# Supplementary material for: Ecology, more than antibiotics consumption, is the major predictor for the global distribution of aminoglycoside-modifying enzymes
Source: eLife. 2023 Feb 14;12:e77015. doi: 10.7554/eLife.77015 (PMC9928423; doi:10.7554/eLife.77015)
Supplement: Source data 1. [file elife-77015-data1.csv]

Source Data 1 – List of genomes that were screened for AMEGs
Genome_ID	Species	Biomes	Sampling_year	IMAGE24_location
GCF_000003135.1	Bifidobacterium longum	NA	NA	NA
GCF_000003215.1	Clostridioides difficile	NA	NA	NA
GCF_000003645.1	Bacillus_A cereus_AD	NA	NA	NA
GCF_000003925.1	Bacillus_A mycoides	NA	NA	NA
GCF_000003955.1	Bacillus_A cereus_P	NA	NA	NA
GCF_000005825.2	Bacillus_S pseudofirmus	NA	NA	NA
GCF_000005845.2	Escherichia flexneri	NA	NA	NA
GCF_000006605.1	Corynebacterium jeikeium	NA	NA	NA
GCF_000006625.1	Ureaplasma parvum	NA	NA	NA
GCF_000006645.1	Yersinia pestis	NA	NA	NA
GCF_000006665.1	Escherichia dysenteriae	NA	NA	NA
GCF_000006685.1	Chlamydia muridarum	NA	NA	NA
GCF_000006725.1	Xylella fastidiosa	NA	NA	NA
GCF_000006745.1	Vibrio cholerae	NA	NA	NA
GCF_000006765.1	Pseudomonas aeruginosa	NA	NA	NA
GCF_000006785.2	Streptococcus pyogenes	NA	NA	NA
GCF_000006825.1	Pasteurella multocida	NA	NA	NA
GCF_000006845.1	Neisseria gonorrhoeae	NA	NA	NA
GCF_000006865.1	Lactococcus lactis	NA	NA	NA
GCF_000006885.1	Streptococcus pneumoniae	NA	NA	NA
GCF_000006905.1	Caulobacter vibrioides	NA	NA	NA
GCF_000006925.2	Escherichia flexneri	NA	NA	NA
GCF_000006945.2	Salmonella enterica	NA	NA	NA
GCF_000006965.1	Sinorhizobium meliloti_B	NA	NA	NA
GCF_000006985.1	Chlorobaculum tepidum	NA	NA	NA
GCF_000007025.1	Rickettsia conorii	NA	NA	NA
GCF_000007045.1	Streptococcus pneumoniae	NA	NA	NA
GCF_000007085.1	Caldanaerobacter subterraneus	NA	NA	NA
GCF_000007105.1	Zymomonas mobilis	NA	NA	NA
GCF_000007125.1	Brucella melitensis	NA	NA	NA
GCF_000007145.1	Xanthomonas campestris	NA	NA	NA
GCF_000007165.1	Xanthomonas citri	NA	NA	NA
GCF_000007205.1	Chlamydophila pneumoniae	NA	NA	NA
GCF_000007245.1	Xylella fastidiosa	NA	NA	NA
GCF_000007265.1	Streptococcus agalactiae	NA	NA	NA
GCF_000007285.1	Streptococcus pyogenes	NA	NA	NA
GCF_000007325.1	Fusobacterium nucleatum	NA	NA	NA
GCF_000007365.1	Buchnera aphidicola_O	NA	NA	NA
GCF_000007385.1	Xanthomonas oryzae	NA	NA	NA
GCF_000007425.1	Streptococcus pyogenes	NA	NA	NA
GCF_000007445.1	Escherichia coli	NA	NA	NA
GCF_000007465.2	Streptococcus mutans	NA	NA	NA
GCF_000007485.1	Tropheryma whipplei	NA	NA	NA
GCF_000007505.1	Brucella melitensis	NA	NA	NA
GCF_000007525.1	Bifidobacterium longum	NA	NA	NA
GCF_000007545.1	Salmonella enterica	NA	NA	NA
GCF_000007565.2	Pseudomonas_E hunanensis	NA	NA	NA
GCF_000007585.1	Porphyromonas gingivalis	NA	NA	NA
GCF_000007605.1	Chlamydophila caviae	NA	NA	NA
GCF_000007625.1	Clostridium_G tetani	NA	NA	NA
GCF_000007645.1	Staphylococcus epidermidis	NA	NA	NA
GCF_000007665.1	Leifsonia xyli_C	NA	NA	NA
GCF_000007685.1	Leptospira interrogans	NA	NA	NA
GCF_000007705.1	Chromobacterium violaceum	NA	NA	NA
GCF_000007725.1	Buchnera aphidicola_H	NA	NA	NA
GCF_000007745.1	Basfia succiniciproducens	NA	NA	NA
GCF_000007765.2	Coxiella burnetii	NA	NA	NA
GCF_000007785.1	Enterococcus faecalis	NA	NA	NA
GCF_000007805.1	Pseudomonas_E avellanae	NA	NA	NA
GCF_000007825.1	Bacillus_A cereus	NA	NA	NA
GCF_000007845.1	Bacillus_A anthracis	NA	NA	NA
GCF_000007865.1	Mycobacterium avium	NA	NA	NA
GCF_000007885.1	Yersinia pestis	NA	NA	NA
GCF_000007905.1	Helicobacter_C hepaticus	NA	NA	NA
GCF_000007925.1	Prochlorococcus marinus	NA	NA	NA
GCF_000007945.1	Haemophilus_B ducreyi	NA	NA	NA
GCF_000007985.2	Geobacter sulfurreducens	NA	NA	NA
GCF_000008005.1	Bacillus_A cereus_AD	NA	NA	NA
GCF_000008025.1	Wolbachia sp000008025	NA	NA	NA
GCF_000008045.1	Rickettsia typhi	NA	NA	NA
GCF_000008065.1	Lactobacillus johnsonii	NA	NA	NA
GCF_000008105.1	Salmonella enterica	NA	NA	NA
GCF_000008125.1	Thermus thermophilus	NA	NA	NA
GCF_000008145.1	Brucella melitensis	NA	NA	NA
GCF_000008165.1	Bacillus_A anthracis	NA	NA	NA
GCF_000008185.1	Treponema_B denticola	NA	NA	NA
GCF_000008205.1	Mesomycoplasma hyopneumoniae	NA	NA	NA
GCF_000008225.1	Mesomycoplasma hyopneumoniae	NA	NA	NA
GCF_000008245.1	Mycoplasmopsis_A synoviae	NA	NA	NA
GCF_000008285.1	Listeria monocytogenes_B	NA	NA	NA
GCF_000008305.1	Mesoplasma florum	NA	NA	NA
GCF_000008325.1	Methylococcus capsulatus	NA	NA	NA
GCF_000008345.1	Cutibacterium acnes	NA	NA	NA
GCF_000008365.1	Mycoplasma_J mobile	NA	NA	NA
GCF_000008385.1	Wolbachia sp000008385	NA	NA	NA
GCF_000008405.1	Mesomycoplasma hyopneumoniae	NA	NA	NA
GCF_000008425.1	Bacillus licheniformis	NA	NA	NA
GCF_000008445.1	Bacillus_A anthracis	NA	NA	NA
GCF_000008465.1	Idiomarina loihiensis	NA	NA	NA
GCF_000008485.1	Legionella pneumophila	NA	NA	NA
GCF_000008505.1	Bacillus_A anthracis	NA	NA	NA
GCF_000008525.1	Helicobacter pylori	NA	NA	NA
GCF_000008545.1	Thermotoga maritima	NA	NA	NA
GCF_000008565.1	Deinococcus radiodurans	NA	NA	NA
GCF_000008585.1	Mycobacterium tuberculosis	NA	NA	NA
GCF_000008625.1	Aquifex aeolicus	NA	NA	NA
GCF_000008685.2	Borreliella burgdorferi	NA	NA	NA
GCF_000008725.1	Chlamydia trachomatis	NA	NA	NA
GCF_000008745.1	Chlamydophila pneumoniae	NA	NA	NA
GCF_000008765.1	Clostridium_S acetobutylicum	NA	NA	NA
GCF_000008785.1	Helicobacter pylori_BU	NA	NA	NA
GCF_000008805.1	Neisseria meningitidis_B	NA	NA	NA
GCF_000008885.1	Wigglesworthia glossinidia_A	NA	NA	NA
GCF_000008925.1	Lactobacillus_B salivarius	NA	NA	NA
GCF_000008945.1	Bifidobacterium longum	NA	NA	NA
GCF_000008985.1	Francisella tularensis	NA	NA	NA
GCF_000009005.1	Staphylococcus aureus	NA	NA	NA
GCF_000009025.1	Dehalococcoides mccartyi_B	NA	NA	NA
GCF_000009045.1	Bacillus subtilis	NA	NA	NA
GCF_000009065.1	Yersinia pestis	NA	NA	NA
GCF_000009085.1	Campylobacter_D jejuni	NA	NA	NA
GCF_000009105.1	Neisseria meningitidis_B	NA	NA	NA
GCF_000009125.1	Ralstonia pseudosolanacearum	NA	NA	NA
GCF_000009145.1	Nitrosomonas europaea	NA	NA	NA
GCF_000009165.1	Xanthomonas perforans	NA	NA	NA
GCF_000009205.2	Clostridioides difficile	NA	NA	NA
GCF_000009225.2	Pseudomonas_E marginalis	NA	NA	NA
GCF_000009245.1	Francisella tularensis	NA	NA	NA
GCF_000009265.1	Rhizobium leguminosarum_L	NA	NA	NA
GCF_000009285.1	Cupriavidus necator	NA	NA	NA
GCF_000009305.1	Helicobacter acinonychis	NA	NA	NA
GCF_000009325.1	Francisella tularensis	NA	NA	NA
GCF_000009345.1	Yersinia enterocolitica	NA	NA	NA
GCF_000009365.1	Alcanivorax borkumensis	NA	NA	NA
GCF_000009385.1	Streptococcus pyogenes	NA	NA	NA
GCF_000009405.1	Staphylococcus carnosus	NA	NA	NA
GCF_000009425.1	Lactococcus lactis_E	NA	NA	NA
GCF_000009445.1	Mycobacterium tuberculosis	NA	NA	NA
GCF_000009465.1	Neisseria meningitidis_B	NA	NA	NA
GCF_000009485.1	Burkholderia cenocepacia	NA	NA	NA
GCF_000009505.1	Salmonella enterica	NA	NA	NA
GCF_000009525.1	Salmonella enterica	NA	NA	NA
GCF_000009545.1	Streptococcus uberis	NA	NA	NA
GCF_000009565.1	Escherichia flexneri	NA	NA	NA
GCF_000009585.1	Staphylococcus aureus	NA	NA	NA
GCF_000009605.1	Buchnera aphidicola_I	NA	NA	NA
GCF_000009625.1	Mesorhizobium japonicum	NA	NA	NA
GCF_000009645.1	Staphylococcus aureus	NA	NA	NA
GCF_000009665.1	Staphylococcus aureus	NA	NA	NA
GCF_000009685.1	Clostridium_P perfringens	NA	NA	NA
GCF_000009705.1	Trichormus sp000009705	NA	NA	NA
GCF_000009725.1	Synechocystis sp000284455	NA	NA	NA
GCF_000009745.1	Vibrio vulnificus	NA	NA	NA
GCF_000009765.2	Streptomyces avermitilis	NA	NA	NA
GCF_000009785.1	Geobacillus thermoleovorans	NA	NA	NA
GCF_000009805.1	Nocardia farcinica	NA	NA	NA
GCF_000009825.1	Bacillus_H rhizosphaerae	NA	NA	NA
GCF_000009865.1	Staphylococcus haemolyticus	NA	NA	NA
GCF_000009885.1	Klebsiella pneumoniae	NA	NA	NA
GCF_000009905.1	Symbiobacterium thermophilum	NA	NA	NA
GCF_000009925.1	Bacteroides fragilis	NA	NA	NA
GCF_000009945.1	Chlamydophila felis	NA	NA	NA
GCF_000009985.1	Magnetospirillum_A magneticum	NA	NA	NA
GCF_000010005.1	Lactobacillus_H reuteri	NA	NA	NA
GCF_000010025.1	Xanthomonas oryzae	NA	NA	NA
GCF_000010045.1	Desulfitobacterium hafniense	NA	NA	NA
GCF_000010065.1	Synechococcus elongatus	NA	NA	NA
GCF_000010085.1	Sodalis glossinidius	NA	NA	NA
GCF_000010105.1	Rhodococcus erythropolis	NA	NA	NA
GCF_000010125.1	Staphylococcus saprophyticus	NA	NA	NA
GCF_000010145.1	Lactobacillus_H fermentum	NA	NA	NA
GCF_000010165.1	Brevibacillus brevis_D	NA	NA	NA
GCF_000010185.1	Finegoldia magna_H	NA	NA	NA
GCF_000010205.1	Orientia tsutsugamushi	NA	NA	NA
GCF_000010225.1	Corynebacterium glutamicum	NA	NA	NA
GCF_000010245.2	Escherichia flexneri	NA	NA	NA
GCF_000010265.1	Clostridium_B kluyveri	NA	NA	NA
GCF_000010285.1	Kocuria rhizophila_A	NA	NA	NA
GCF_000010305.1	Gemmatimonas aurantiaca	NA	NA	NA
GCF_000010325.1	Nitratiruptor sp000010325	NA	NA	NA
GCF_000010345.1	Sulfurovum sp000010345	NA	NA	NA
GCF_000010385.1	Escherichia flexneri	NA	NA	NA
GCF_000010405.1	Vesicomyosocius okutanii	NA	NA	NA
GCF_000010425.1	Bifidobacterium adolescentis	NA	NA	NA
GCF_000010445.1	Staphylococcus aureus	NA	NA	NA
GCF_000010465.1	Staphylococcus aureus	NA	NA	NA
GCF_000010485.1	Escherichia coli	NA	NA	NA
GCF_000010505.1	Porphyromonas gingivalis	NA	NA	NA
GCF_000010525.1	Azorhizobium caulinodans	NA	NA	NA
GCF_000010545.1	Burkholderia multivorans	NA	NA	NA
GCF_000010585.1	Macrococcus caseolyticus	NA	NA	NA
GCF_000010605.1	Streptomyces griseus	NA	NA	NA
GCF_000010625.1	Microcystis aeruginosa_B	NA	NA	NA
GCF_000010645.1	Azobacteroides pseudotrichonymphae_B	NA	NA	NA
GCF_000010665.1	Desulfovibrio_F magneticus	NA	NA	NA
GCF_000010685.1	Mycobacterium tuberculosis	NA	NA	NA
GCF_000010705.1	Streptococcus dysgalactiae	NA	NA	NA
GCF_000010725.1	Azospirillum lipoferum_B	NA	NA	NA
GCF_000010745.1	Escherichia flexneri	NA	NA	NA
GCF_000010765.1	Escherichia flexneri	NA	NA	NA
GCF_000010785.1	Hydrogenobacter thermophilus	NA	NA	NA
GCF_000010805.1	Rhodococcus opacus_C	NA	NA	NA
GCF_000010825.1	Acetobacter pasteurianus	NA	NA	NA
GCF_000010845.1	Acetobacter pasteurianus	NA	NA	NA
GCF_000010865.1	Acetobacter pasteurianus	NA	NA	NA
GCF_000010885.1	Acetobacter pasteurianus	NA	NA	NA
GCF_000010905.1	Acetobacter pasteurianus	NA	NA	NA
GCF_000010925.1	Acetobacter pasteurianus	NA	NA	NA
GCF_000010945.1	Acetobacter pasteurianus	NA	NA	NA
GCF_000010965.1	Acetobacter pasteurianus	NA	NA	NA
GCF_000010985.1	Deferribacter desulfuricans	NA	NA	NA
GCF_000011025.1	Rothia sp001808955	NA	NA	NA
GCF_000011045.1	Lactobacillus_C rhamnosus	NA	NA	NA
GCF_000011065.1	Bacteroides thetaiotaomicron	NA	NA	NA
GCF_000011145.1	Bacillus_M okuhidensis	NA	NA	NA
GCF_000011165.1	Chlamydophila pneumoniae	NA	NA	NA
GCF_000011225.1	Malacoplasma penetrans	NA	NA	NA
GCF_000011245.1	Oceanobacillus iheyensis	NA	NA	NA
GCF_000011265.1	Staphylococcus aureus	NA	NA	NA
GCF_000011285.1	Streptococcus pyogenes	NA	NA	NA
GCF_000011305.1	Corynebacterium efficiens	NA	NA	NA
GCF_000011325.1	Corynebacterium glutamicum	NA	NA	NA
GCF_000011345.1	Thermosynechococcus elongatus	NA	NA	NA
GCF_000011365.1	Bradyrhizobium diazoefficiens	NA	NA	NA
GCF_000011385.1	Gloeobacter violaceus	NA	NA	NA
GCF_000011405.1	Francisella tularensis	NA	NA	NA
GCF_000011445.1	Mycoplasma mycoides	NA	NA	NA
GCF_000011465.1	Prochlorococcus_A marinus_S	NA	NA	NA
GCF_000011485.1	Prochlorococcus_C marinus_B	NA	NA	NA
GCF_000011505.1	Staphylococcus aureus	NA	NA	NA
GCF_000011525.1	Staphylococcus aureus	NA	NA	NA
GCF_000011545.1	Burkholderia mallei	NA	NA	NA
GCF_000011565.1	Protochlamydia amoebophila	NA	NA	NA
GCF_000011605.1	Pectobacterium atrosepticum	NA	NA	NA
GCF_000011625.1	Bacillus_A anthracis	NA	NA	NA
GCF_000011645.1	Bacillus licheniformis	NA	NA	NA
GCF_000011665.1	Streptococcus pyogenes	NA	NA	NA
GCF_000011685.1	Gluconobacter oxydans_C	NA	NA	NA
GCF_000011705.1	Burkholderia mallei	NA	NA	NA
GCF_000011725.1	Helicobacter pylori_C	NA	NA	NA
GCF_000011745.1	Blochmannia pennsylvanicus	NA	NA	NA
GCF_000011765.3	Streptococcus pyogenes	NA	NA	NA
GCF_000011785.1	Histophilus somni	NA	NA	NA
GCF_000011805.1	Aliivibrio fischeri	NA	NA	NA
GCF_000011825.1	Streptococcus thermophilus	NA	NA	NA
GCF_000011845.1	Streptococcus thermophilus	NA	NA	NA
GCF_000011865.1	Campylobacter_D jejuni	NA	NA	NA
GCF_000011885.1	Salmonella enterica	NA	NA	NA
GCF_000011905.1	Dehalococcoides mccartyi	NA	NA	NA
GCF_000011925.1	Staphylococcus epidermidis	NA	NA	NA
GCF_000011945.1	Anaplasma marginale	NA	NA	NA
GCF_000011965.2	Ruegeria_B pomeroyi	NA	NA	NA
GCF_000011985.1	Lactobacillus acidophilus	NA	NA	NA
GCF_000012005.1	Escherichia dysenteriae	NA	NA	NA
GCF_000012045.1	Staphylococcus aureus	NA	NA	NA
GCF_000012065.2	Borrelia hermsii	NA	NA	NA
GCF_000012085.2	Borrelia turicatae	NA	NA	NA
GCF_000012105.1	Xanthomonas campestris	NA	NA	NA
GCF_000012125.1	Chlamydia trachomatis	NA	NA	NA
GCF_000012145.1	Rickettsia felis	NA	NA	NA
GCF_000012165.1	Streptococcus pyogenes	NA	NA	NA
GCF_000012185.1	Haemophilus influenzae	NA	NA	NA
GCF_000012205.1	Pseudomonas_E ficuserectae	NA	NA	NA
GCF_000012225.1	Phytoplasma sp000012225	NA	NA	NA
GCF_000012245.1	Pseudomonas_E syringae_M	NA	NA	NA
GCF_000012265.1	Pseudomonas_E protegens	NA	NA	NA
GCF_000012305.1	Psychrobacter arcticus	NA	NA	NA
GCF_000012325.1	Colwellia psychrerythraea_A	NA	NA	NA
GCF_000012345.1	Pelagibacter ubique_R	NA	NA	NA
GCF_000012365.1	Burkholderia thailandensis	NA	NA	NA
GCF_000012385.1	Rickettsia bellii	NA	NA	NA
GCF_000012405.1	Thermobifida fusca	NA	NA	NA
GCF_000012425.1	Dechloromonas aromatica	NA	NA	NA
GCF_000012445.1	Pseudomonas_E fluorescens_AR	NA	NA	NA
GCF_000012465.1	Prochlorococcus_B marinus_B	NA	NA	NA
GCF_000012485.1	Chlorobium luteolum	NA	NA	NA
GCF_000012505.1	Synechococcus_C sp000012505	NA	NA	NA
GCF_000012525.1	Synechococcus elongatus	NA	NA	NA
GCF_000012565.1	Ehrlichia canis	NA	NA	NA
GCF_000012585.1	Chlorobium chlorochromatii	NA	NA	NA
GCF_000012605.1	Hydrogenovibrio crunogenus	NA	NA	NA
GCF_000012625.1	Synechococcus_C sp000012625	NA	NA	NA
GCF_000012645.1	Prochlorococcus_A marinus_L	NA	NA	NA
GCF_000012665.1	Desulfovibrio_C alaskensis	NA	NA	NA
GCF_000012685.1	Myxococcus xanthus	NA	NA	NA
GCF_000012705.1	Streptococcus agalactiae	NA	NA	NA
GCF_000012725.1	Nitrobacter winogradskyi	NA	NA	NA
GCF_000012745.1	Thiobacillus denitrificans_B	NA	NA	NA
GCF_000012765.1	Mycoplasma capricolum	NA	NA	NA
GCF_000012785.1	Burkholderia mallei	NA	NA	NA
GCF_000012805.1	Nitrosococcus oceani	NA	NA	NA
GCF_000012825.1	Bacteroides_B vulgatus	NA	NA	NA
GCF_000012845.1	Parabacteroides distasonis	NA	NA	NA
GCF_000012865.1	Carboxydothermus hydrogenoformans	NA	NA	NA
GCF_000012885.1	Pelobacter_A carbinolicus	NA	NA	NA
GCF_000012905.2	Rhodobacter_A sphaeroides	NA	NA	NA
GCF_000012925.1	Geobacter metallireducens	NA	NA	NA
GCF_000012945.1	Burkholderia lata	NA	NA	NA
GCF_000012965.1	Sulfurimonas denitrificans	NA	NA	NA
GCF_000012985.1	Hahella chejuensis	NA	NA	NA
GCF_000013005.1	Erythrobacter_C litoralis	NA	NA	NA
GCF_000013025.1	Hyphomonas neptunium	NA	NA	NA
GCF_000013045.1	Salinibacter ruber	NA	NA	NA
GCF_000013065.1	Bacillus_A cereus_AD	NA	NA	NA
GCF_000013085.1	Rhodospirillum rubrum	NA	NA	NA
GCF_000013105.1	Moorella thermoacetica	NA	NA	NA
GCF_000013125.1	Anaplasma phagocytophilum	NA	NA	NA
GCF_000013145.1	Ehrlichia chaffeensis	NA	NA	NA
GCF_000013165.1	Neorickettsia sennetsu	NA	NA	NA
GCF_000013185.1	Baumannia cicadellinicola_D	NA	NA	NA
GCF_000013205.1	JA-3-3Ab sp000013205	Freshwater	2002	USA
GCF_000013225.1	JA-3-3Ab sp000013225	NA	NA	NA
GCF_000013245.1	Helicobacter pylori	NA	NA	NA
GCF_000013265.1	Escherichia coli	NA	NA	NA
GCF_000013285.1	Clostridium_P perfringens	NA	NA	NA
GCF_000013305.1	Escherichia coli	NA	NA	NA
GCF_000013325.1	Novosphingobium aromaticivorans	NA	NA	NA
GCF_000013345.1	Frankia casuarinae	NA	NA	NA
GCF_000013365.1	Rhodopseudomonas palustris_J	NA	NA	NA
GCF_000013385.1	Anaeromyxobacter dehalogenans_B	NA	NA	NA
GCF_000013405.1	Syntrophus aciditrophicus	NA	NA	NA
GCF_000013425.1	Staphylococcus aureus	NA	NA	NA
GCF_000013465.1	Staphylococcus aureus	NA	NA	NA
GCF_000013485.1	Streptococcus pyogenes	NA	NA	NA
GCF_000013505.1	Streptococcus pyogenes	NA	NA	NA
GCF_000013545.1	Streptococcus pyogenes	NA	NA	NA
GCF_000013565.1	EhC01 sp000013565	NA	NA	NA
GCF_000013605.1	Rhodoferax ferrireducens	NA	NA	NA
GCF_000013625.1	Herminiimonas sp000013625	NA	NA	NA
GCF_000013645.1	Paraburkholderia xenovorans	NA	NA	NA
GCF_000013665.1	Saccharophagus degradans	NA	NA	NA
GCF_000013685.1	Rhodopseudomonas pseudopalustris	NA	NA	NA
GCF_000013705.1	Methylobacillus flagellatus	NA	NA	NA
GCF_000013745.1	Rhodopseudomonas palustris_D	NA	NA	NA
GCF_000013765.1	Shewanella denitrificans	NA	NA	NA
GCF_000013785.1	Pseudomonas_A stutzeri	NA	NA	NA
GCF_000013805.1	Yersinia pestis	NA	NA	NA
GCF_000013825.1	Yersinia pestis	NA	NA	NA
GCF_000013865.1	Polaromonas sp000013865	NA	NA	NA
GCF_000013885.1	Nitrobacter hamburgensis	NA	NA	NA
GCF_000013905.1	Psychrobacter cryohalolentis	NA	NA	NA
GCF_000013925.1	Mycobacterium pseudoshottsii	NA	NA	NA
GCF_000013945.1	Leptospira borgpetersenii	NA	NA	NA
GCF_000013965.1	Leptospira borgpetersenii	NA	NA	NA
GCF_000013985.1	Sphingopyxis alaskensis	NA	NA	NA
GCF_000014005.1	Koribacter versatilis	NA	NA	NA
GCF_000014025.1	Aliarcobacter butzleri	NA	NA	NA
GCF_000014045.1	Roseobacter denitrificans	NA	NA	NA
GCF_000014065.1	Tritonibacter sp000014065	NA	NA	NA
GCF_000014085.1	Burkholderia cenocepacia_B	NA	NA	NA
GCF_000014105.1	Neisseria meningitidis_B	NA	NA	NA
GCF_000014125.1	Clostridium_H novyi	NA	NA	NA
GCF_000014145.1	Cytophaga hutchinsonii	NA	NA	NA
GCF_000014165.1	Mycolicibacterium monacense	NA	NA	NA
GCF_000014185.1	Rubrobacter_B xylanophilus	NA	NA	NA
GCF_000014205.1	Streptococcus sanguinis	NA	NA	NA
GCF_000014225.1	Paraglaciecola atlantica	NA	NA	NA
GCF_000014245.1	Chelativorans sp000014245	NA	NA	NA
GCF_000014265.1	Trichodesmium erythraeum	NA	NA	NA
GCF_000014285.2	Granulibacter bethesdensis	NA	NA	NA
GCF_000014345.1	Rickettsia canadensis	NA	NA	NA
GCF_000014365.2	Streptococcus pneumoniae	NA	NA	NA
GCF_000014385.1	Oenococcus oeni	NA	NA	NA
GCF_000014405.1	Lactobacillus delbrueckii	NA	NA	NA
GCF_000014425.1	Lactobacillus gasseri	NA	NA	NA
GCF_000014445.1	Leuconostoc mesenteroides	NA	NA	NA
GCF_000014465.1	Lactobacillus_G brevis	NA	NA	NA
GCF_000014485.1	Streptococcus thermophilus	NA	NA	NA
GCF_000014505.1	Pediococcus pentosaceus	NA	NA	NA
GCF_000014525.1	Lactobacillus_C paracasei	NA	NA	NA
GCF_000014545.1	Lactococcus lactis_E	NA	NA	NA
GCF_000014565.1	Rhodococcus jostii_A	NA	NA	NA
GCF_000014585.1	Synechococcus_C sp000014585	NA	NA	NA
GCF_000014605.1	Francisella tularensis	NA	NA	NA
GCF_000014625.1	Pseudomonas aeruginosa	NA	NA	NA
GCF_000014645.1	Francisella tularensis	NA	NA	NA
GCF_000014665.1	Shewanella sp000014665	NA	NA	NA
GCF_000014685.1	Shewanella sp000014665	NA	NA	NA
GCF_000014705.1	Shewanella frigidimarina	NA	NA	NA
GCF_000014725.1	Syntrophomonas wolfei	NA	NA	NA
GCF_000014745.1	Maricaulis maris	NA	NA	NA
GCF_000014765.1	Nitrosomonas eutropha	NA	NA	NA
GCF_000014785.1	Alkalilimnicola ehrlichii	NA	NA	NA
GCF_000014805.1	Aeromonas hydrophila	NA	NA	NA
GCF_000014825.1	Rhodopseudomonas palustris_B	NA	NA	NA
GCF_000014845.1	Escherichia coli	NA	NA	NA
GCF_000014865.1	Magnetococcus marinus	NA	NA	NA
GCF_000014885.1	Shewanella piezotolerans	NA	NA	NA
GCF_000014905.1	Solibacter usitatus	NA	NA	NA
GCF_000014925.1	Paenarthrobacter aurescens	NA	NA	NA
GCF_000014965.1	Syntrophobacter fumaroxidans	NA	NA	NA
GCF_000014985.1	Mycobacterium avium	NA	NA	NA
GCF_000015005.1	Mycolicibacterium smegmatis	NA	NA	NA
GCF_000015025.1	Acidothermus cellulolyticus	NA	NA	NA
GCF_000015045.1	Pelobacter_C propionicus	NA	NA	NA
GCF_000015065.1	Bacillus_A anthracis	NA	NA	NA
GCF_000015085.1	Campylobacter fetus	NA	NA	NA
GCF_000015105.1	Ruthia magnifica	NA	NA	NA
GCF_000015125.1	Chlorobium phaeobacteroides	NA	NA	NA
GCF_000015165.1	Bradyrhizobium sp000015165	NA	NA	NA
GCF_000015185.1	Shewanella putrefaciens	NA	NA	NA
GCF_000015245.1	Shewanella amazonensis	NA	NA	NA
GCF_000015265.1	Nocardioides sp000015265	NA	NA	NA
GCF_000015285.1	Psychromonas ingrahamii	NA	NA	NA
GCF_000015305.1	Mycolicibacterium vanbaalenii	NA	NA	NA
GCF_000015325.1	Acidovorax_A citrulli	NA	NA	NA
GCF_000015345.1	Dichelobacter nodosus	NA	NA	NA
GCF_000015365.1	Marinobacter hydrocarbonoclasticus	NA	NA	NA
GCF_000015385.1	Lactobacillus helveticus	NA	NA	NA
GCF_000015405.1	Mycolicibacterium monacense	NA	NA	NA
GCF_000015445.1	Bartonella bacilliformis	NA	NA	NA
GCF_000015465.1	Burkholderia mallei	NA	NA	NA
GCF_000015485.1	Desulfovibrio_A vulgaris	NA	NA	NA
GCF_000015505.1	Polaromonas naphthalenivorans	NA	NA	NA
GCF_000015525.1	Campylobacter_D jejuni	NA	NA	NA
GCF_000015545.1	Diaphorobacter sp003248855	NA	NA	NA
GCF_000015565.1	Verminephrobacter eiseniae	NA	NA	NA
GCF_000015585.1	Halorhodospira halophila	NA	NA	NA
GCF_000015605.1	Burkholderia mallei	NA	NA	NA
GCF_000015625.1	Burkholderia mallei	NA	NA	NA
GCF_000015645.1	Prochlorococcus_A marinus_O	NA	NA	NA
GCF_000015665.1	Prochlorococcus_A marinus_P	NA	NA	NA
GCF_000015685.1	Prochlorococcus_B marinus_B	NA	NA	NA
GCF_000015725.1	Methylibium petroleiphilum	NA	NA	NA
GCF_000015745.1	Geobacillus thermodenitrificans	NA	NA	NA
GCF_000015785.1	Bacillus velezensis	NA	NA	NA
GCF_000015845.1	Shewanella baltica	NA	NA	NA
GCF_000015865.1	Ruminiclostridium thermocellum	NA	NA	NA
GCF_000015885.1	Actinobacillus pleuropneumoniae	NA	NA	NA
GCF_000015905.1	Burkholderia mallei	NA	NA	NA
GCF_000015925.1	Burkholderia mallei	NA	NA	NA
GCF_000015965.1	Prochlorococcus_A marinus_E	NA	NA	NA
GCF_000015985.1	Rhodobacter_A sphaeroides	NA	NA	NA
GCF_000016005.1	Mycolicibacterium monacense	NA	NA	NA
GCF_000016045.1	Salmonella enterica	NA	NA	NA
GCF_000016065.1	Shewanella loihica	NA	NA	NA
GCF_000016085.1	Chlorobium phaeovibrioides	NA	NA	NA
GCF_000016105.1	Francisella tularensis	NA	NA	NA
GCF_000016145.1	Mycobacterium tuberculosis	NA	NA	NA
GCF_000016165.1	Desulfotomaculum_H reducens	NA	NA	NA
GCF_000016185.1	Rhodospirillum_A centenum	NA	NA	NA
GCF_000016245.1	Vibrio cholerae	NA	NA	NA
GCF_000016265.1	Rhizobium rhizogenes	NA	NA	NA
GCF_000016285.1	Allorhizobium vitis_A	NA	NA	NA
GCF_000016305.1	Klebsiella pneumoniae	NA	NA	NA
GCF_000016325.1	Lelliottia sp000016325	NA	NA	NA
GCF_000016345.1	Polynucleobacter asymbioticus	NA	NA	NA
GCF_000016365.1	Mycolicibacterium gilvum	NA	NA	NA
GCF_000016405.1	Rhodobacter_A azotoformans	NA	NA	NA
GCF_000016425.1	Micromonospora tropica	NA	NA	NA
GCF_000016445.1	Yersinia pestis	NA	NA	NA
GCF_000016465.1	Haemophilus influenzae	NA	NA	NA
GCF_000016485.1	Haemophilus influenzae	NA	NA	NA
GCF_000016505.1	Clostridium_B kluyveri	NA	NA	NA
GCF_000016545.1	Caldicellulosiruptor saccharolyticus	NA	NA	NA
GCF_000016565.1	Pseudomonas_E mendocina_A	NA	NA	NA
GCF_000016585.1	Shewanella putrefaciens	NA	NA	NA
GCF_000016625.1	Rickettsia aeschlimannii	NA	NA	NA
GCF_000016645.1	Flavobacterium johnsoniae	NA	NA	NA
GCF_000016665.1	Roseiflexus sp000016665	NA	NA	NA
GCF_000016685.1	Actinobacillus pleuropneumoniae	NA	NA	NA
GCF_000016705.1	Dehalococcoides mccartyi_B	NA	NA	NA
GCF_000016725.1	Acidiphilium multivorum	NA	NA	NA
GCF_000016745.1	Geobacter_B uraniireducens	NA	NA	NA
GCF_000016765.1	Rhizorhabdus wittichii	NA	NA	NA
GCF_000016785.1	Thermotoga petrophila	NA	NA	NA
GCF_000016805.1	Staphylococcus aureus	NA	NA	NA
GCF_000016825.1	Lactobacillus_H reuteri	NA	NA	NA
GCF_000016845.1	Brucella melitensis	NA	NA	NA
GCF_000016865.1	Pseudomonas_E hunanensis	NA	NA	NA
GCF_000016885.1	Psychrobacter sp000016885	NA	NA	NA
GCF_000016905.1	Thermosipho melanesiensis	NA	NA	NA
GCF_000016925.1	Mycobacterium tuberculosis	NA	NA	NA
GCF_000016945.1	Yersinia pestis	NA	NA	NA
GCF_000016965.1	Clostridium beijerinckii	NA	NA	NA
GCF_000016985.1	Alkaliphilus_A metalliredigens	NA	NA	NA
GCF_000017005.1	Streptococcus gordonii	NA	NA	NA
GCF_000017025.1	Clostridium_F botulinum	NA	NA	NA
GCF_000017045.1	Clostridium_F botulinum	NA	NA	NA
GCF_000017065.1	Clostridium_F botulinum	NA	NA	NA
GCF_000017085.1	Staphylococcus aureus	NA	NA	NA
GCF_000017105.1	Coxiella burnetii	NA	NA	NA
GCF_000017125.1	Staphylococcus aureus	NA	NA	NA
GCF_000017145.1	Sinorhizobium medicae	NA	NA	NA
GCF_000017205.1	Pseudomonas aeruginosa_A	NA	NA	NA
GCF_000017245.1	Basfia succinogenes	NA	NA	NA
GCF_000017265.1	Phenylobacterium zucineum_A	NA	NA	NA
GCF_000017285.1	Marinomonas sp000017285	NA	NA	NA
GCF_000017305.1	Kineococcus radiotolerans	NA	NA	NA
GCF_000017325.1	Shewanella baltica	NA	NA	NA
GCF_000017405.1	Ochrobactrum anthropi	NA	NA	NA
GCF_000017425.1	Bacillus_A cytotoxicus	NA	NA	NA
GCF_000017445.4	Rickettsia conorii	NA	NA	NA
GCF_000017465.2	Campylobacter_A curvus	NA	NA	NA
GCF_000017485.1	Campylobacter_D jejuni	NA	NA	NA
GCF_000017505.1	Anaeromyxobacter sp000017505	NA	NA	NA
GCF_000017545.1	Fervidobacterium nodosum	NA	NA	NA
GCF_000017565.1	Parvibaculum lavamentivorans	NA	NA	NA
GCF_000017585.1	Campylobacter_B hominis	NA	NA	NA
GCF_000017605.1	Leptospira_A biflexa	NA	NA	NA
GCF_000017645.1	Xanthobacter autotrophicus	NA	NA	NA
GCF_000017665.1	Cronobacter sakazakii	NA	NA	NA
GCF_000017685.1	Leptospira_A biflexa	NA	NA	NA
GCF_000017705.1	Vibrio campbellii	NA	NA	NA
GCF_000017725.2	Campylobacter_A concisus_T	NA	NA	NA
GCF_000017745.1	Escherichia flexneri	NA	NA	NA
GCF_000017765.1	Escherichia flexneri	NA	NA	NA
GCF_000017785.1	Francisella tularensis	NA	NA	NA
GCF_000017805.1	Roseiflexus castenholzii	NA	NA	NA
GCF_000017845.1	Crocosphaera sp000017845	NA	NA	NA
GCF_000017865.1	Pseudothermotoga_B lettingae	NA	NA	NA
GCF_000017885.4	Bacillus pumilus	NA	NA	NA
GCF_000017905.1	Campylobacter_D jejuni	NA	NA	NA
GCF_000017985.1	Escherichia flexneri	NA	NA	NA
GCF_000018005.1	Frankia sp000018005	NA	NA	NA
GCF_000018025.1	Shewanella sediminis	NA	NA	NA
GCF_000018045.1	Citrobacter_B koseri	NA	NA	NA
GCF_000018065.1	Prochlorococcus_A marinus_A	NA	NA	NA
GCF_000018085.1	Serratia proteamaculans_C	NA	NA	NA
GCF_000018105.1	Acaryochloris marina	NA	NA	NA
GCF_000018125.1	Streptococcus pyogenes	NA	NA	NA
GCF_000018145.1	Dinoroseobacter shibae	NA	NA	NA
GCF_000018185.1	Streptococcus suis	NA	NA	NA
GCF_000018205.1	Rickettsia akari	NA	NA	NA
GCF_000018225.1	Rickettsia conorii	NA	NA	NA
GCF_000018245.1	Rickettsia bellii	NA	NA	NA
GCF_000018265.1	Micromonospora arenicola	NA	NA	NA
GCF_000018285.1	Shewanella pealeana	NA	NA	NA
GCF_000018325.1	Alkaliphilus_B oremlandii	NA	NA	NA
GCF_000018345.1	Mycobacterium pseudoshottsii	NA	NA	NA
GCF_000018385.1	Salmonella enterica	NA	NA	NA
GCF_000018405.1	Desulfococcus_A oleovorans	NA	NA	NA
GCF_000018425.1	Desulforudis audaxviator	NA	NA	NA
GCF_000018445.1	Acinetobacter baumannii	NA	NA	NA
GCF_000018505.1	Burkholderia multivorans	NA	NA	NA
GCF_000018525.1	Brucella melitensis	NA	NA	NA
GCF_000018545.1	Sinorhizobium fredii_A	NA	NA	NA
GCF_000018585.1	Prochlorococcus_D marinus_B	NA	NA	NA
GCF_000018605.1	Petrotoga mobilis	NA	NA	NA
GCF_000018625.1	Salmonella enterica_E	NA	NA	NA
GCF_000018665.1	Delftia acidovorans	NA	NA	NA
GCF_000018685.1	Lachnoclostridium phytofermentans	NA	NA	NA
GCF_000018705.1	Salmonella enterica	NA	NA	NA
GCF_000018725.1	Brucella melitensis	NA	NA	NA
GCF_000018745.1	Coxiella burnetii	NA	NA	NA
GCF_000018765.1	Shewanella baltica	NA	NA	NA
GCF_000018785.1	Acholeplasma laidlawii	NA	NA	NA
GCF_000018805.1	Yersinia pestis	NA	NA	NA
GCF_000018825.1	Bacillus_A mycoides	NA	NA	NA
GCF_000018845.1	Methylobacterium extorquens	NA	NA	NA
GCF_000018865.1	Chloroflexus aurantiacus	NA	NA	NA
GCF_000018885.1	Renibacterium salmoninarum	NA	NA	NA
GCF_000018905.1	Brucella melitensis	NA	NA	NA
GCF_000018925.1	Francisella tularensis	NA	NA	NA
GCF_000018945.1	Thermotoga neapolitana	NA	NA	NA
GCF_000018965.1	Streptococcus pneumoniae	NA	NA	NA
GCF_000018985.1	Streptococcus pneumoniae	NA	NA	NA
GCF_000019005.1	Streptococcus pneumoniae	NA	NA	NA
GCF_000019025.1	Streptococcus pneumoniae	NA	NA	NA
GCF_000019045.1	Anoxybacillus flavithermus	NA	NA	NA
GCF_000019065.1	Thermoanaerobacter pseudethanolicus	NA	NA	NA
GCF_000019085.1	Thermoanaerobacter pseudethanolicus	NA	NA	NA
GCF_000019125.1	Pseudomonas_E putida_P	NA	NA	NA
GCF_000019145.1	Caulobacter sp000019145	NA	NA	NA
GCF_000019165.1	Heliobacterium modesticaldum	NA	NA	NA
GCF_000019185.1	Shewanella halifaxensis	NA	NA	NA
GCF_000019205.1	Campylobacter_D lari	NA	NA	NA
GCF_000019225.1	Cellvibrio japonicus	NA	NA	NA
GCF_000019245.4	Lactobacillus_C paracasei	NA	NA	NA
GCF_000019265.1	Streptococcus pneumoniae	NA	NA	NA
GCF_000019285.1	Francisella philomiragia	NA	NA	NA
GCF_000019305.1	Clostridium_F botulinum	NA	NA	NA
GCF_000019325.1	Xylella fastidiosa	NA	NA	NA
GCF_000019345.1	Ureaplasma parvum	NA	NA	NA
GCF_000019365.1	Methylobacterium sp000019365	NA	NA	NA
GCF_000019385.1	Escherichia flexneri	NA	NA	NA
GCF_000019405.1	Histophilus somni	NA	NA	NA
GCF_000019425.1	Escherichia flexneri	NA	NA	NA
GCF_000019445.1	Pseudomonas_E putida_E	NA	NA	NA
GCF_000019465.1	Yersinia pestis	NA	NA	NA
GCF_000019485.1	Limnothrix sp001693275	NA	NA	NA
GCF_000019505.1	Burkholderia cenocepacia_B	NA	NA	NA
GCF_000019525.1	Shewanella woodyi	NA	NA	NA
GCF_000019545.1	Clostridium_F botulinum	NA	NA	NA
GCF_000019565.1	Klebsiella variicola	NA	NA	NA
GCF_000019585.2	Xanthomonas oryzae	NA	NA	NA
GCF_000019625.1	Thermotoga maritima	NA	NA	NA
GCF_000019645.1	Escherichia coli_D	NA	NA	NA
GCF_000019665.1	Methylacidiphilum infernorum	NA	NA	NA
GCF_000019685.1	Borrelia duttonii	NA	NA	NA
GCF_000019705.1	Borrelia duttonii	NA	NA	NA
GCF_000019725.1	Methylobacterium organophilum	NA	NA	NA
GCF_000019745.1	Polynucleobacter necessarius	NA	NA	NA
GCF_000019765.1	Xylella fastidiosa	NA	NA	NA
GCF_000019785.1	Leptothrix cholodnii	NA	NA	NA
GCF_000019825.1	Streptococcus pneumoniae	NA	NA	NA
GCF_000019845.1	Beijerinckia indica	NA	NA	NA
GCF_000019865.1	Coxiella burnetii	NA	NA	NA
GCF_000019885.1	Coxiella burnetii	NA	NA	NA
GCF_000019905.1	Exiguobacterium_A sibiricum	NA	NA	NA
GCF_000019925.1	Burkholderia ambifaria	NA	NA	NA
GCF_000019945.1	Methylobacterium populi	NA	NA	NA
GCF_000019965.1	Opitutus terrae	NA	NA	NA
GCF_000019985.1	Streptococcus pneumoniae	NA	NA	NA
GCF_000020005.1	Natranaerobius thermophilus	NA	NA	NA
GCF_000020025.1	Nostoc punctiforme	NA	NA	NA
GCF_000020045.1	Paraburkholderia_A phymatum	NA	NA	NA
GCF_000020065.1	Metamycoplasma arthritidis	NA	NA	NA
GCF_000020085.1	Yersinia pestis	NA	NA	NA
GCF_000020105.1	Neisseria gonorrhoeae	NA	NA	NA
GCF_000020125.1	Paraburkholderia phytofirmans	NA	NA	NA
GCF_000020145.1	Elusimicrobium minutum	NA	NA	NA
GCF_000020165.1	Clostridium botulinum_B	NA	NA	NA
GCF_000020205.1	Ralstonia pickettii_B	NA	NA	NA
GCF_000020225.1	Akkermansia muciniphila	NA	NA	NA
GCF_000020245.1	Helicobacter pylori_C	NA	NA	NA
GCF_000020265.1	Rhizobium phaseoli	NA	NA	NA
GCF_000020285.1	Clostridium botulinum_A	NA	NA	NA
GCF_000020305.1	Anaplasma marginale	NA	NA	NA
GCF_000020325.1	Sulfurihydrogenibium sp000020325	NA	NA	NA
GCF_000020345.1	Clostridium_F botulinum	NA	NA	NA
GCF_000020365.1	Desulfobacterium_B autotrophicum	NA	NA	NA
GCF_000020385.1	Geobacter_C lovleyi	NA	NA	NA
GCF_000020405.1	Actinobacillus pleuropneumoniae	NA	NA	NA
GCF_000020425.1	Bifidobacterium infantis	NA	NA	NA
GCF_000020445.1	Rhodopseudomonas palustris_F	NA	NA	NA
GCF_000020465.1	Chlorobium limicola	NA	NA	NA
GCF_000020485.1	Halothermothrix orenii	NA	NA	NA
GCF_000020505.1	Chlorobaculum parvum	NA	NA	NA
GCF_000020525.1	Chloroherpeton thalassium	NA	NA	NA
GCF_000020545.1	Chlorobium_A phaeobacteroides	NA	NA	NA
GCF_000020565.1	Amoebophilus asiaticus	NA	NA	NA
GCF_000020585.3	Alteromonas mediterranea	NA	NA	NA
GCF_000020605.1	Agathobacter rectale	NA	NA	NA
GCF_000020625.1	Prosthecochloris aestuarii	NA	NA	NA
GCF_000020645.1	Chlorobium phaeoclathratiforme	NA	NA	NA
GCF_000020665.1	Stenotrophomonas maltophilia_L	NA	NA	NA
GCF_000020685.1	Deinococcus deserti	NA	NA	NA
GCF_000020705.1	Salmonella enterica	NA	NA	NA
GCF_000020725.1	Geobacter_A bemidjiensis	NA	NA	NA
GCF_000020745.1	Salmonella enterica	NA	NA	NA
GCF_000020765.1	Streptococcus equi	NA	NA	NA
GCF_000020785.1	Hydrogenobaculum sp000020785	NA	NA	NA
GCF_000020805.1	Anaeromyxobacter dehalogenans	NA	NA	NA
GCF_000020825.1	Acidithiobacillus ferrooxidans	NA	NA	NA
GCF_000020845.1	Aliivibrio fischeri	NA	NA	NA
GCF_000020865.1	Edwardsiella piscicida	NA	NA	NA
GCF_000020885.1	Salmonella enterica	NA	NA	NA
GCF_000020925.1	Salmonella enterica	NA	NA	NA
GCF_000020945.1	Coprothermobacter proteolyticus	NA	NA	NA
GCF_000020965.1	Dictyoglomus thermophilum	NA	NA	NA
GCF_000020985.1	Thermodesulfovibrio yellowstonii	NA	NA	NA
GCF_000021005.1	Rhodobacter_A sphaeroides	NA	NA	NA
GCF_000021025.1	Laribacter hongkongensis	NA	NA	NA
GCF_000021045.1	Azotobacter vinelandii	NA	NA	NA
GCF_000021065.1	Buchnera aphidicola_I	NA	NA	NA
GCF_000021085.1	Buchnera aphidicola_I	NA	NA	NA
GCF_000021125.1	Escherichia dysenteriae	NA	NA	NA
GCF_000021165.1	Helicobacter pylori	NA	NA	NA
GCF_000021185.1	Listeria monocytogenes_C	NA	NA	NA
GCF_000021205.1	Bacillus_A cereus	NA	NA	NA
GCF_000021225.1	Bacillus_A cereus_AD	NA	NA	NA
GCF_000021245.2	Acinetobacter baumannii	NA	NA	NA
GCF_000021265.1	Ureaplasma urealyticum	NA	NA	NA
GCF_000021285.1	Thermosipho africanus	NA	NA	NA
GCF_000021305.1	Bacillus_A thuringiensis_S	NA	NA	NA
GCF_000021325.1	Gluconacetobacter diazotrophicus	NA	NA	NA
GCF_000021345.1	Rhizobium acidisoli	NA	NA	NA
GCF_000021365.1	Afipia carboxidovorans	NA	NA	NA
GCF_000021385.1	Desulfovibrio_A vulgaris_A	NA	NA	NA
GCF_000021405.1	Borreliella burgdorferi	NA	NA	NA
GCF_000021425.1	Bifidobacterium animalis	NA	NA	NA
GCF_000021445.1	Bacillus_A anthracis	NA	NA	NA
GCF_000021465.1	Helicobacter pylori	NA	NA	NA
GCF_000021485.1	Acidithiobacillus ferrooxidans	NA	NA	NA
GCF_000021525.1	Rickettsia conorii	NA	NA	NA
GCF_000021545.1	Sulfurihydrogenibium azorense	NA	NA	NA
GCF_000021565.1	Persephonella marina	NA	NA	NA
GCF_000021605.1	Vibrio cholerae	NA	NA	NA
GCF_000021625.1	Vibrio cholerae	NA	NA	NA
GCF_000021645.1	Dictyoglomus turgidum	NA	NA	NA
GCF_000021665.1	Shewanella baltica	NA	NA	NA
GCF_000021685.1	Thermomicrobium roseum	NA	NA	NA
GCF_000021705.1	Hamiltonella defensa	NA	NA	NA
GCF_000021725.1	Nautilia profundicola	NA	NA	NA
GCF_000021745.1	Methylocella silvestris	NA	NA	NA
GCF_000021765.1	Thauera aminoaromatica	NA	NA	NA
GCF_000021785.1	Bacillus_A anthracis	NA	NA	NA
GCF_000021805.1	Cyanothece_A sp000021805	NA	NA	NA
GCF_000021825.1	Cyanothece_B sp000021825	NA	NA	NA
GCF_000021845.1	Methylobacterium extorquens	NA	NA	NA
GCF_000021865.1	Rhodobacter capsulatus_B	NA	NA	NA
GCF_000021885.1	Glaesserella parasuis	NA	NA	NA
GCF_000021905.1	Desulfatibacillum aliphaticivorans	NA	NA	NA
GCF_000021925.1	Desulfitobacterium hafniense	NA	NA	NA
GCF_000021945.1	Chloroflexus aggregans	NA	NA	NA
GCF_000021985.1	Thioalkalivibrio_A sulfidiphilus	NA	NA	NA
GCF_000022005.1	Caulobacter vibrioides	NA	NA	NA
GCF_000022025.1	Pseudarthrobacter chlorophenolicus	NA	NA	NA
GCF_000022045.1	Cyanothece sp000022045	NA	NA	NA
GCF_000022065.1	Ruminiclostridium_A cellulolyticum	NA	NA	NA
GCF_000022085.1	Methylobacterium nodulans	NA	NA	NA
GCF_000022105.1	Brachyspira hyodysenteriae	NA	NA	NA
GCF_000022125.1	Desulfovibrio desulfuricans_A	NA	NA	NA
GCF_000022145.1	Anaeromyxobacter dehalogenans	NA	NA	NA
GCF_000022165.1	Salmonella enterica	NA	NA	NA
GCF_000022185.1	Chloroflexus aurantiacus	NA	NA	NA
GCF_000022225.1	Escherichia dysenteriae	NA	NA	NA
GCF_000022245.1	Escherichia flexneri	NA	NA	NA
GCF_000022265.1	Geobacter_B daltonii	NA	NA	NA
GCF_000022285.1	Wolbachia sp000008025	NA	NA	NA
GCF_000022305.1	Diaphorobacter sp003248855	NA	NA	NA
GCF_000022325.1	Caldicellulosiruptor bescii	NA	NA	NA
GCF_000022345.1	Escherichia flexneri	NA	NA	NA
GCF_000022505.1	Bacillus_A anthracis	NA	NA	NA
GCF_000022525.1	Neorickettsia risticii	NA	NA	NA
GCF_000022565.1	Acidobacterium capsulatum	NA	NA	NA
GCF_000022585.1	Vibrio cholerae	NA	NA	NA
GCF_000022605.2	Blattabacterium sp000022605	NA	NA	NA
GCF_000022625.1	Brucella melitensis	NA	NA	NA
GCF_000022645.2	Burkholderia glumae	NA	NA	NA
GCF_000022665.1	Escherichia flexneri	NA	NA	NA
GCF_000022685.1	Methylobacterium extorquens	NA	NA	NA
GCF_000022705.1	Bifidobacterium animalis	NA	NA	NA
GCF_000022725.1	Bartonella grahamii	NA	NA	NA
GCF_000022745.1	Brucella melitensis	NA	NA	NA
GCF_000022765.1	Clostridium_F botulinum	NA	NA	NA
GCF_000022785.1	Rickettsia prowazekii	NA	NA	NA
GCF_000022805.1	Yersinia pestis	NA	NA	NA
GCF_000022825.1	Yersinia pestis	NA	NA	NA
GCF_000022845.1	Yersinia pestis	NA	NA	NA
GCF_000022865.1	Bacillus_A anthracis	NA	NA	NA
GCF_000022885.2	Edwardsiella ictaluri	NA	NA	NA
GCF_000022905.1	Corynebacterium aurimucosum	NA	NA	NA
GCF_000022925.1	Listeria monocytogenes	NA	NA	NA
GCF_000022985.1	Aggregatibacter aphrophilus	NA	NA	NA
GCF_000023005.1	Rickettsia conorii	NA	NA	NA
GCF_000023025.1	Teredinibacter turnerae_B	NA	NA	NA
GCF_000023045.1	Exiguobacterium profundum	NA	NA	NA
GCF_000023065.1	Tolumonas auensis	NA	NA	NA
GCF_000023085.1	Lactobacillus_F plantarum	NA	NA	NA
GCF_000023105.1	Beutenbergia cavernae	NA	NA	NA
GCF_000023125.1	Dyadobacter fermentans	Agrosystems	1998	USA
GCF_000023145.1	Corynebacterium kroppenstedtii	NA	NA	NA
GCF_000023165.1	Mycoplasma mycoides_A	NA	NA	NA
GCF_000023185.1	Rhizobium leguminosarum_J	NA	NA	NA
GCF_000023205.1	Micrococcus luteus	NA	NA	NA
GCF_000023225.1	Desulfomicrobium baculatum	NA	NA	NA
GCF_000023245.1	Actinosynnema mirum	NA	NA	NA
GCF_000023265.1	Acidimicrobium ferrooxidans	Freshwater	1993	Western Europe
GCF_000023285.1	Capnocytophaga ochracea	NA	NA	NA
GCF_000023305.1	Francisella tularensis	NA	NA	NA
GCF_000023325.1	Kosmotoga olearia	NA	NA	NA
GCF_000023345.1	Variovorax paradoxus	NA	NA	NA
GCF_000023365.1	Escherichia flexneri	NA	NA	NA
GCF_000023385.1	Parageobacillus galactosidasius	NA	NA	NA
GCF_000023405.1	Brachybacterium faecium	NA	NA	NA
GCF_000023425.1	Ralstonia pickettii_B	NA	NA	NA
GCF_000023445.1	Desulfovibrio_H salexigens	NA	NA	NA
GCF_000023465.1	Zunongwangia profunda	NA	NA	NA
GCF_000023585.1	Paenibacillus_C sp000023585	NA	NA	NA
GCF_000023605.1	Pectobacterium carotovorum_B	NA	NA	NA
GCF_000023625.1	Mycobacterium tuberculosis	NA	NA	NA
GCF_000023645.1	Geobacter_A sp000023645	NA	NA	NA
GCF_000023665.1	Escherichia flexneri	NA	NA	NA
GCF_000023685.1	Mycoplasma mycoides_A	NA	NA	NA
GCF_000023705.1	Methylotenera mobilis	NA	NA	NA
GCF_000023725.1	Chryseobacterium_A sp000023725	NA	NA	NA
GCF_000023745.1	Methylovorus glucosotrophus	NA	NA	NA
GCF_000023765.2	Liberibacter asiaticus	NA	NA	NA
GCF_000023785.1	Hirschia baltica	NA	NA	NA
GCF_000023805.1	Helicobacter pylori_C	NA	NA	NA
GCF_000023825.1	Pedobacter heparinus	NA	NA	NA
GCF_000023845.1	Cryptobacterium curtum	NA	NA	NA
GCF_000023865.1	Saccharomonospora viridis	NA	NA	NA
GCF_000023885.1	Slackia heliotrinireducens	NA	NA	NA
GCF_000023905.1	Leptotrichia buccalis	NA	NA	NA
GCF_000023925.1	Kytococcus sedentarius	NA	NA	NA
GCF_000024005.1	Chitinophaga pinensis	NA	NA	NA
GCF_000024025.1	Catenulispora acidiphila	Wild flora and fauna	2006	Western Europe
GCF_000024045.1	Cyanothece_A sp000021805	NA	NA	NA
GCF_000024065.1	Jonesia denitrificans	NA	NA	NA
GCF_000024085.1	Kangiella koreensis	NA	NA	NA
GCF_000024105.1	Anaerococcus prevotii	NA	NA	NA
GCF_000024125.1	Robiginitalea biformata	NA	NA	NA
GCF_000024145.1	Chlamydophila pneumoniae	NA	NA	NA
GCF_000024165.1	Accumulibacter phosphatis_C	Sludge and waste	2004	USA
GCF_000024205.1	Desulfotomaculum_F acetoxidans	NA	NA	NA
GCF_000024225.1	Lancefieldella parvula	NA	NA	NA
GCF_000024245.1	Zymomonas mobilis	NA	NA	NA
GCF_000024265.1	Eggerthella lenta	NA	NA	NA
GCF_000024285.1	Alicyclobacillus acidocaldarius	NA	NA	NA
GCF_000024325.1	Desulfohalobium retbaense	NA	NA	NA
GCF_000024345.1	Kribbella flavida	NA	NA	NA
GCF_000024365.1	Nakamurella multipartita	NA	NA	NA
GCF_000024385.1	Thermomonospora curvata	NA	NA	NA
GCF_000024405.1	Sebaldella termitidis	NA	NA	NA
GCF_000024425.1	Meiothermus ruber	NA	NA	NA
GCF_000024445.1	Bifidobacterium dentium	NA	NA	NA
GCF_000024465.1	Puniceispirillum marinum	NA	NA	NA
GCF_000024485.1	Treponema pallidum	NA	NA	NA
GCF_000024505.1	Anaplasma centrale	NA	NA	NA
GCF_000024545.1	Stackebrandtia nassauensis	NA	NA	NA
GCF_000024565.1	Streptobacillus moniliformis	NA	NA	NA
GCF_000024585.1	Staphylococcus aureus	NA	NA	NA
GCF_000024605.1	Ammonifex degensii	NA	NA	NA
GCF_000024645.1	Pectobacterium parmentieri	NA	NA	NA
GCF_000024665.1	Fibrobacter succinogenes	NA	NA	NA
GCF_000024685.1	Paenibacillus lautus	NA	NA	NA
GCF_000024705.1	Geobacillus thermoleovorans	NA	NA	NA
GCF_000024725.1	Nitrosococcus halophilus	NA	NA	NA
GCF_000024765.1	Halothiobacillus neapolitanus	NA	NA	NA
GCF_000024785.1	Gordonia bronchialis	NA	NA	NA
GCF_000024805.1	Haliangium ochraceum	NA	NA	NA
GCF_000024825.1	Vibrio diabolicus	NA	NA	NA
GCF_000024845.1	Rhodothermus marinus	NA	NA	NA
GCF_000024865.1	Streptosporangium roseum	NA	NA	NA
GCF_000024885.1	Sulfurospirillum deleyianum	NA	NA	NA
GCF_000024905.1	Thermanaerovibrio acidaminovorans	NA	NA	NA
GCF_000024925.1	Sanguibacter keddieii	Farms and cattle	1995	Western Europe
GCF_000024945.1	Veillonella parvula	NA	NA	NA
GCF_000024965.1	Xylanimonas cellulosilytica	NA	NA	NA
GCF_000024985.1	Sphaerobacter thermophilus	NA	NA	NA
GCF_000025005.1	Thermobaculum terrenum	NA	NA	NA
GCF_000025025.1	Dehalococcoides mccartyi_A	NA	NA	NA
GCF_000025045.1	Lactococcus lactis	NA	NA	NA
GCF_000025065.1	Dickeya zeae	NA	NA	NA
GCF_000025085.1	Staphylococcus lugdunensis	NA	NA	NA
GCF_000025105.1	Thermotoga petrophila	NA	NA	NA
GCF_000025125.1	Atelocyanobacterium thalassa_B	NA	NA	NA
GCF_000025145.1	Staphylococcus aureus	NA	NA	NA
GCF_000025165.1	Escherichia dysenteriae	NA	NA	NA
GCF_000025185.1	Pirellula staleyi	NA	NA	NA
GCF_000025205.1	Bifidobacterium vaginale_G	NA	NA	NA
GCF_000025225.2	Mageeibacillus indolicus	NA	NA	NA
GCF_000025245.1	Bifidobacterium animalis	NA	NA	NA
GCF_000025265.1	Conexibacter woesei	NA	NA	NA
GCF_000025305.1	Acidaminococcus fermentans	NA	NA	NA
GCF_000025345.1	Geodermatophilus obscurus	NA	NA	NA
GCF_000025365.1	Mycoplasmoides gallisepticum	NA	NA	NA
GCF_000025385.1	Mycoplasmoides gallisepticum	NA	NA	NA
GCF_000025405.2	Pantoea ananatis	NA	NA	NA
GCF_000025425.1	Campylobacter_D jejuni	NA	NA	NA
GCF_000025465.1	Klebsiella variicola	NA	NA	NA
GCF_000025485.1	Allochromatium vinosum	NA	NA	NA
GCF_000025545.1	Thioalkalivibrio sp000025545	NA	NA	NA
GCF_000025565.1	Enterobacter cloacae	NA	NA	NA
GCF_000025585.1	Dehalococcoides mccartyi_B	NA	NA	NA
GCF_000025605.1	Thermocrinis albus	NA	NA	NA
GCF_000025645.1	Thermoanaerobacter thermocopriae	NA	NA	NA
GCF_000025705.1	Sideroxydans lithotrophicus	NA	NA	NA
GCF_000025725.1	Denitrovibrio acetiphilus	NA	NA	NA
GCF_000025745.1	Escherichia coli	NA	NA	NA
GCF_000025765.1	Cutibacterium acnes	NA	NA	NA
GCF_000025805.1	Bacillus_C megaterium	NA	NA	NA
GCF_000025825.1	Bacillus_C megaterium	NA	NA	NA
GCF_000025845.1	Mycoplasmopsis_A crocodyli	NA	NA	NA
GCF_000025885.1	Aminobacterium colombiense	NA	NA	NA
GCF_000025905.1	Coraliomargarita akajimensis	NA	NA	NA
GCF_000025925.1	Prevotella ruminicola	NA	NA	NA
GCF_000025945.1	Desulfotalea psychrophila	NA	NA	NA
GCF_000025965.1	Aromatoleum aromaticum	NA	NA	NA
GCF_000025985.1	Bacteroides fragilis	NA	NA	NA
GCF_000026005.1	Ehrlichia ruminantium	NA	NA	NA
GCF_000026025.1	Chlamydophila abortus	NA	NA	NA
GCF_000026065.1	Lactobacillus_D sakei	NA	NA	NA
GCF_000026085.1	Pseudoalteromonas nigrifaciens	NA	NA	NA
GCF_000026105.1	Pseudomonas_E entomophila	NA	NA	NA
GCF_000026125.1	Herminiimonas arsenicoxydans	NA	NA	NA
GCF_000026145.1	Bradyrhizobium sp000026145	NA	NA	NA
GCF_000026185.1	Erwinia tasmaniensis	NA	NA	NA
GCF_000026205.1	Phytoplasma mali	NA	NA	NA
GCF_000026225.1	Escherichia fergusonii	NA	NA	NA
GCF_000026245.1	Escherichia flexneri	NA	NA	NA
GCF_000026265.1	Escherichia flexneri	NA	NA	NA
GCF_000026285.1	Escherichia coli	NA	NA	NA
GCF_000026305.1	Escherichia coli	NA	NA	NA
GCF_000026325.1	Escherichia coli_D	NA	NA	NA
GCF_000026345.1	Escherichia coli_D	NA	NA	NA
GCF_000026405.1	Leuconostoc citreum	NA	NA	NA
GCF_000026445.2	Mycobacterium pseudoshottsii	NA	NA	NA
GCF_000026485.1	Lactobacillus_C paracasei	NA	NA	NA
GCF_000026505.1	Lactobacillus_C rhamnosus	NA	NA	NA
GCF_000026525.1	Lactobacillus_C rhamnosus	NA	NA	NA
GCF_000026545.1	Escherichia coli	NA	NA	NA
GCF_000026565.1	Salmonella enterica	NA	NA	NA
GCF_000026605.1	Streptococcus equi	Farms and cattle	2000	Western Europe
GCF_000026645.1	Pseudomonas aeruginosa	NA	NA	NA
GCF_000026665.1	Streptococcus pneumoniae	NA	NA	NA
GCF_000026685.1	Mycobacterium leprae	NA	NA	NA
GCF_000026705.1	Listeria monocytogenes_B	NA	NA	NA
GCF_000026725.1	Streptococcus suis	Clinical samples	2005	China+
GCF_000026745.1	Streptococcus suis	Clinical samples	2004	Southeastern Asia
GCF_000026765.1	Mesomycoplasma conjunctivae	NA	NA	NA
GCF_000026905.1	Chlamydia trachomatis	NA	NA	NA
GCF_000026925.1	Chlamydia trachomatis	NA	NA	NA
GCF_000026965.1	Neisseria meningitidis_B	NA	NA	NA
GCF_000026985.1	Erwinia pyrifoliae	NA	NA	NA
GCF_000027025.1	Salmonella enterica	Clinical samples	2004	Southern Africa
GCF_000027045.1	Staphylococcus aureus	NA	NA	NA
GCF_000027065.2	Cronobacter turicensis	NA	NA	NA
GCF_000027085.1	Citrobacter_A rodentium	NA	NA	NA
GCF_000027125.1	Escherichia coli_D	NA	NA	NA
GCF_000027145.1	Listeria seeligeri	NA	NA	NA
GCF_000027165.1	Streptococcus mitis_AR	NA	NA	NA
GCF_000027185.1	Streptococcus gallolyticus	NA	NA	NA
GCF_000027205.1	Erwinia amylovora	NA	NA	NA
GCF_000027225.1	Xenorhabdus bovienii_C	NA	NA	NA
GCF_000027265.1	Erwinia pyrifoliae	NA	NA	NA
GCF_000027305.1	Haemophilus influenzae	NA	NA	NA
GCF_000027325.1	Mycoplasmoides genitalium	NA	NA	NA
GCF_000027345.1	Mycoplasmoides pneumoniae	NA	NA	NA
GCF_000039765.1	Vibrio vulnificus	NA	NA	NA
GCF_000043285.1	Blochmannia floridanus	NA	NA	NA
GCF_000046685.1	Bartonella quintana	NA	NA	NA
GCF_000046705.1	Bartonella henselae	NA	NA	NA
GCF_000046845.1	Acinetobacter baylyi	NA	NA	NA
GCF_000047365.1	Yersinia pestis	NA	NA	NA
GCF_000048645.1	Legionella pneumophila	NA	NA	NA
GCF_000048665.1	Legionella pneumophila	NA	NA	NA
GCF_000050405.1	Ehrlichia ruminantium	NA	NA	NA
GCF_000050425.1	Ehrlichia ruminantium	NA	NA	NA
GCF_000054005.1	Brucella melitensis	NA	NA	NA
GCF_000055785.1	Chromohalobacter salexigens	NA	NA	NA
GCF_000055945.1	Lawsonia intracellularis	NA	NA	NA
GCF_000056065.1	Lactobacillus delbrueckii	NA	NA	NA
GCF_000058485.1	Frankia alni	NA	NA	NA
GCF_000060285.1	Listeria welshimeri	NA	NA	NA
GCF_000060345.1	Gramella forsetii	NA	NA	NA
GCF_000061505.1	Azoarcus_B olearius	NA	NA	NA
GCF_000062885.1	Saccharopolyspora erythraea	NA	NA	NA
GCF_000063485.1	Clavibacter michiganensis	NA	NA	NA
GCF_000063505.1	Synechococcus_C sp000063505	NA	NA	NA
GCF_000063525.1	RCC307 sp000063525	NA	NA	NA
GCF_000063545.1	Orientia tsutsugamushi	NA	NA	NA
GCF_000063585.1	Clostridium_F botulinum	NA	NA	NA
GCF_000063605.1	Mycoplasmopsis agalactiae	NA	NA	NA
GCF_000064305.2	Flavobacterium psychrophilum	NA	NA	NA
GCF_000067045.1	Gluconacetobacter diazotrophicus	NA	NA	NA
GCF_000067165.1	Sorangium cellulosum_B	NA	NA	NA
GCF_000067205.1	Bordetella_A petrii	NA	NA	NA
GCF_000068525.2	Chlamydia trachomatis	NA	NA	NA
GCF_000068585.1	Chlamydia trachomatis	NA	NA	NA
GCF_000069185.1	Mycobacteroides abscessus	NA	NA	NA
GCF_000069225.1	Clavibacter sepedonicus	NA	NA	NA
GCF_000069245.1	Acinetobacter baumannii	NA	NA	NA
GCF_000069785.1	Cupriavidus taiwanensis	NA	NA	NA
GCF_000069925.1	Phytoplasma australiense	NA	NA	NA
GCF_000069945.1	Corynebacterium urealyticum	NA	NA	NA
GCF_000069965.1	Proteus mirabilis	NA	NA	NA
GCF_000070465.1	Bordetella avium	NA	NA	NA
GCF_000070605.1	Xanthomonas campestris	NA	NA	NA
GCF_000072485.1	Stenotrophomonas maltophilia	NA	NA	NA
GCF_000073005.1	Wolbachia sp000376585	NA	NA	NA
GCF_000083545.1	Methylobacterium extorquens	NA	NA	NA
GCF_000083565.1	Neisseria meningitidis_B	NA	NA	NA
GCF_000085225.1	Clostridioides difficile	NA	NA	NA
GCF_000085865.1	Metamycoplasma hominis	NA	NA	NA
GCF_000087965.2	Xanthomonas_A albilineans	NA	NA	NA
GCF_000089865.1	Mycoplasmopsis agalactiae	NA	NA	NA
GCF_000090405.2	Salinibacter ruber	NA	NA	NA
GCF_000090875.1	Neisseria sp000090875	NA	NA	NA
GCF_000090945.1	Anaerosphaera sp000468535	NA	NA	NA
GCF_000090965.1	Buchnera aphidicola_F	NA	NA	NA
GCF_000091005.1	Escherichia flexneri	NA	NA	NA
GCF_000091125.1	Sphingobium japonicum	NA	NA	NA
GCF_000091305.1	Streptomyces scabiei	NA	NA	NA
GCF_000091325.1	Shewanella violacea	NA	NA	NA
GCF_000091345.1	Helicobacter pylori	NA	NA	NA
GCF_000091405.1	Lactobacillus johnsonii	NA	NA	NA
GCF_000091465.1	Vibrio tasmaniensis	NA	NA	NA
GCF_000091545.1	Thermus thermophilus	NA	NA	NA
GCF_000091565.1	Erwinia amylovora	NA	NA	NA
GCF_000091645.1	Streptococcus mutans	NA	NA	NA
GCF_000091725.1	Propionibacterium freudenreichii	NA	NA	NA
GCF_000091765.1	Lactobacillus crispatus	NA	NA	NA
GCF_000091785.1	Legionella longbeachae	NA	NA	NA
GCF_000091905.1	Streptococcus suis	NA	NA	NA
GCF_000091985.1	Helicobacter_H mustelae	NA	NA	NA
GCF_000092025.1	Agrobacterium fabrum_B	NA	NA	NA
GCF_000092045.1	Rhizobium etli	NA	NA	NA
GCF_000092105.1	Planctopirus limnophila	NA	NA	NA
GCF_000092125.1	Meiothermus_B silvanus	NA	NA	NA
GCF_000092165.1	Bacillus_A cereus	NA	NA	NA
GCF_000092205.1	Desulfurivibrio alkaliphilus	NA	NA	NA
GCF_000092225.1	Tsukamurella paurometabola	NA	NA	NA
GCF_000092245.1	Arcobacter nitrofigilis	NA	NA	NA
GCF_000092265.1	Moraxella catarrhalis	NA	NA	NA
GCF_000092285.1	Caulobacter segnis	NA	NA	NA
GCF_000092325.1	Bifidobacterium longum	NA	NA	NA
GCF_000092345.1	Clostridium_F botulinum	NA	NA	NA
GCF_000092365.1	Arcanobacterium haemolyticum	NA	NA	NA
GCF_000092385.1	Streptomyces milbemycinicus	NA	NA	NA
GCF_000092405.1	Syntrophothermus lipocalidus	NA	NA	NA
GCF_000092425.1	Truepera radiovictrix	NA	NA	NA
GCF_000092445.1	Geobacillus thermoleovorans	NA	NA	NA
GCF_000092485.1	Chlamydia trachomatis	NA	NA	NA
GCF_000092505.1	Leuconostoc kimchii	NA	NA	NA
GCF_000092545.1	Legionella pneumophila	NA	NA	NA
GCF_000092565.1	Leptospira interrogans	NA	NA	NA
GCF_000092585.1	Mycoplasmoides gallisepticum	NA	NA	NA
GCF_000092605.1	Thiomonas arsenitoxydans	NA	NA	NA
GCF_000092625.1	Legionella pneumophila	NA	NA	NA
GCF_000092645.1	Thermobispora bispora	NA	NA	NA
GCF_000092665.1	Chlamydia trachomatis	NA	NA	NA
GCF_000092685.1	Chlamydia trachomatis	NA	NA	NA
GCF_000092705.1	Chlamydia trachomatis	NA	NA	NA
GCF_000092725.1	Chlamydia trachomatis	NA	NA	NA
GCF_000092745.1	Chlamydia trachomatis	NA	NA	NA
GCF_000092765.1	Bifidobacterium animalis	NA	NA	NA
GCF_000092785.1	Waddlia chondrophila	NA	NA	NA
GCF_000092805.1	Chlamydia trachomatis	NA	NA	NA
GCF_000092825.1	Segniliparus rotundus	NA	NA	NA
GCF_000092845.1	Brachyspira murdochii	Farms and cattle	1992	Canada
GCF_000092865.1	Cellulomonas flavigena	NA	NA	NA
GCF_000092885.1	Paraburkholderia sp000092885	NA	NA	NA
GCF_000092905.1	Kyrpidia tusciae	NA	NA	NA
GCF_000092925.1	Starkeya novella	NA	NA	NA
GCF_000092945.1	Thermincola ferriacetica	NA	NA	NA
GCF_000092965.1	Thermoanaerobacter thermocopriae	NA	NA	NA
GCF_000092985.1	Nocardiopsis dassonvillei	NA	NA	NA
GCF_000093005.1	Chlamydia trachomatis	NA	NA	NA
GCF_000093025.1	Methylotenera versatilis	NA	NA	NA
GCF_000093065.1	Riesia pediculicola	NA	NA	NA
GCF_000093085.1	Salisediminibacterium selenitireducens	NA	NA	NA
GCF_000093125.2	Listeria monocytogenes	NA	NA	NA
GCF_000093145.3	Comamonas_B thiooxydans	NA	NA	NA
GCF_000093165.1	Blattabacterium sp000334405	NA	NA	NA
GCF_000093185.1	Helicobacter pylori_C	NA	NA	NA
GCF_000142965.1	Prevotella oris	NA	NA	NA
GCF_000143085.1	Nitrosococcus watsonii	NA	NA	NA
GCF_000143145.1	Hyphomicrobium denitrificans	NA	NA	NA
GCF_000143165.1	Dehalogenimonas lykanthroporepellens	NA	NA	NA
GCF_000143205.1	Lactococcus lactis_E	NA	NA	NA
GCF_000143225.1	Herbaspirillum seropedicae	NA	NA	NA
GCF_000143585.1	Rothia dentocariosa	NA	NA	NA
GCF_000143605.1	Bacillus_A anthracis	NA	NA	NA
GCF_000143625.1	Regiella insecticola	NA	NA	NA
GCF_000143645.1	Lactobacillus gasseri_A	NA	NA	NA
GCF_000143685.1	Clostridium_B ljungdahlii	NA	NA	NA
GCF_000143705.1	Corynebacterium pseudotuberculosis	NA	NA	NA
GCF_000143725.1	Brachyspira pilosicoli	NA	NA	NA
GCF_000143745.1	Lactobacillus_F plantarum	NA	NA	NA
GCF_000143765.1	Sphingobacterium spiritivorum	NA	NA	NA
GCF_000143785.1	Chryseobacterium gleum	NA	NA	NA
GCF_000143825.1	Corynebacterium genitalium	NA	NA	NA
GCF_000143845.1	Olsenella uli	NA	NA	NA
GCF_000143865.1	Mycoplasma mycoides	NA	NA	NA
GCF_000143885.2	Gordonia sp000143885	NA	NA	NA
GCF_000143945.1	Mycoplasmoides pneumoniae	NA	NA	NA
GCF_000143965.1	Desulfarculus baarsii	NA	NA	NA
GCF_000143985.1	Sediminispirochaeta smaragdinae	NA	NA	NA
GCF_000144005.1	Cutibacterium acnes	NA	NA	NA
GCF_000144025.1	Cutibacterium acnes	NA	NA	NA
GCF_000144045.1	Cutibacterium acnes	NA	NA	NA
GCF_000144065.1	Cutibacterium acnes	NA	NA	NA
GCF_000144085.1	Cutibacterium humerusii	NA	NA	NA
GCF_000144105.1	Cutibacterium acnes	NA	NA	NA
GCF_000144125.1	Cutibacterium acnes	NA	NA	NA
GCF_000144145.1	Cutibacterium acnes	NA	NA	NA
GCF_000144165.1	Cutibacterium acnes	NA	NA	NA
GCF_000144185.1	Cutibacterium acnes	NA	NA	NA
GCF_000144205.1	Cutibacterium acnes	NA	NA	NA
GCF_000144225.1	Cutibacterium acnes	NA	NA	NA
GCF_000144245.1	Cutibacterium acnes	NA	NA	NA
GCF_000144265.1	Cutibacterium acnes	NA	NA	NA
GCF_000144285.1	Cutibacterium acnes	NA	NA	NA
GCF_000144305.1	Cutibacterium acnes	NA	NA	NA
GCF_000144325.1	Cutibacterium acnes	NA	NA	NA
GCF_000144345.1	Cutibacterium acnes	NA	NA	NA
GCF_000144365.1	Cutibacterium acnes	NA	NA	NA
GCF_000144385.1	Cutibacterium acnes	NA	NA	NA
GCF_000144405.1	Prevotella melaninogenica	NA	NA	NA
GCF_000144425.1	Cutibacterium acnes	NA	NA	NA
GCF_000144445.1	Cutibacterium acnes	NA	NA	NA
GCF_000144465.1	Cutibacterium acnes	NA	NA	NA
GCF_000144485.1	Cutibacterium acnes	NA	NA	NA
GCF_000144505.1	Cutibacterium acnes	NA	NA	NA
GCF_000144525.1	Cutibacterium acnes	NA	NA	NA
GCF_000144545.1	Cutibacterium acnes	NA	NA	NA
GCF_000144565.1	Cutibacterium acnes	NA	NA	NA
GCF_000144585.1	Cutibacterium acnes	NA	NA	NA
GCF_000144605.1	Brevundimonas subvibrioides	NA	NA	NA
GCF_000144625.1	Hungatella saccharolyticum	NA	NA	NA
GCF_000144645.1	Thermosediminibacter oceani	NA	NA	NA
GCF_000144675.1	Corynebacterium pseudotuberculosis	NA	NA	NA
GCF_000144695.1	Acetohalobium arabaticum	NA	NA	NA
GCF_000144715.1	Cutibacterium acnes	NA	NA	NA
GCF_000144735.1	Cutibacterium acnes	NA	NA	NA
GCF_000144755.1	Cutibacterium acnes	NA	NA	NA
GCF_000144775.1	Cutibacterium acnes	NA	NA	NA
GCF_000144795.1	Cutibacterium acnes	NA	NA	NA
GCF_000144815.1	Cutibacterium acnes	NA	NA	NA
GCF_000144835.1	Cutibacterium acnes	NA	NA	NA
GCF_000144855.1	Cutibacterium acnes	NA	NA	NA
GCF_000144875.1	Cutibacterium acnes	NA	NA	NA
GCF_000144895.1	Cutibacterium acnes	NA	NA	NA
GCF_000144935.1	Corynebacterium pseudotuberculosis	NA	NA	NA
GCF_000144955.1	Staphylococcus aureus	NA	NA	NA
GCF_000144975.1	Parasutterella excrementihominis	NA	NA	NA
GCF_000144995.1	Neisseria meningitidis_B	Human samples	2007	Western Europe
GCF_000145015.1	Neisseria meningitidis_B	Human samples	2009	Western Europe
GCF_000145035.1	Butyrivibrio proteoclasticus	NA	NA	NA
GCF_000145055.1	Cutibacterium acnes	NA	NA	NA
GCF_000145075.1	Cutibacterium humerusii	NA	NA	NA
GCF_000145095.1	Cutibacterium acnes	NA	NA	NA
GCF_000145115.1	Cutibacterium acnes	NA	NA	NA
GCF_000145135.1	Cutibacterium acnes	NA	NA	NA
GCF_000145155.1	Cutibacterium acnes	NA	NA	NA
GCF_000145175.1	Cutibacterium acnes	NA	NA	NA
GCF_000145195.1	Cutibacterium acnes	NA	NA	NA
GCF_000145215.1	Caldicellulosiruptor obsidiansis	NA	NA	NA
GCF_000145235.1	Micromonospora aurantiaca	NA	NA	NA
GCF_000145255.1	Gallionella capsiferriformans	NA	NA	NA
GCF_000145275.1	Clostridium_K cellulovorans	NA	NA	NA
GCF_000145315.2	Desulfovibrio fairfieldensis	NA	NA	NA
GCF_000145335.1	Cutibacterium acnes	NA	NA	NA
GCF_000145355.1	Cutibacterium acnes	NA	NA	NA
GCF_000145375.1	Cutibacterium acnes	NA	NA	NA
GCF_000145415.1	Cutibacterium humerusii	NA	NA	NA
GCF_000145435.1	Cutibacterium acnes	NA	NA	NA
GCF_000145455.1	Cutibacterium acnes	NA	NA	NA
GCF_000145475.1	Cutibacterium acnes	NA	NA	NA
GCF_000145495.1	Cutibacterium acnes	NA	NA	NA
GCF_000145515.1	Cutibacterium acnes	NA	NA	NA
GCF_000145535.1	Cutibacterium acnes	NA	NA	NA
GCF_000145555.1	Cutibacterium acnes	NA	NA	NA
GCF_000145575.1	Cutibacterium acnes	NA	NA	NA
GCF_000145595.1	Staphylococcus aureus	NA	NA	NA
GCF_000145615.1	Thermoanaerobacterium thermosaccharolyticum	NA	NA	NA
GCF_000145685.1	Pseudomonas_E ficuserectae	NA	NA	NA
GCF_000145705.1	Mesomycoplasma hyorhinis	NA	NA	NA
GCF_000145745.1	Pseudomonas_E avellanae	NA	NA	NA
GCF_000145865.1	Pseudomonas_E avellanae	NA	NA	NA
GCF_000145885.1	Pseudomonas_E avellanae	NA	NA	NA
GCF_000145925.1	Pseudomonas_E syringae_M	NA	NA	NA
GCF_000145945.2	Pseudomonas_E ficuserectae	NA	NA	NA
GCF_000146025.2	Endomicrobium_A trichonymphae	NA	NA	NA
GCF_000146065.2	Cloacimonas acidaminovorans	NA	NA	NA
GCF_000146165.2	Shewanella oneidensis	NA	NA	NA
GCF_000146185.1	Lachnospira eligens	NA	NA	NA
GCF_000146285.1	Mobiluncus curtisii	NA	NA	NA
GCF_000146305.1	Edwardsiella piscicida	NA	NA	NA
GCF_000146325.1	Pediococcus acidilactici	NA	NA	NA
GCF_000146345.1	Peptoniphilus_B duerdenii	NA	NA	NA
GCF_000146365.1	Centipeda sp001189555	NA	NA	NA
GCF_000146385.1	Staphylococcus aureus	NA	NA	NA
GCF_000146405.1	Streptococcus pasteurianus	NA	NA	NA
GCF_000146485.1	Corynebacterium accolens	NA	NA	NA
GCF_000146505.1	Fibrobacter succinogenes	NA	NA	NA
GCF_000146525.1	Streptococcus gallolyticus	NA	NA	NA
GCF_000146565.1	Bacillus marinus	NA	NA	NA
GCF_000146585.1	Streptococcus mitis_AZ	NA	NA	NA
GCF_000146655.1	Neisseria meningitidis_B	NA	NA	NA
GCF_000146675.1	Prevotella marshii	NA	NA	NA
GCF_000146715.1	Streptococcus pyogenes	NA	NA	NA
GCF_000146735.1	Escherichia flexneri	NA	NA	NA
GCF_000146755.1	Streptococcus oralis_T	NA	NA	NA
GCF_000146775.1	Bifidobacterium dentium	NA	NA	NA
GCF_000146835.1	Campylobacter_D coli	NA	NA	NA
GCF_000146875.3	Paenibacillus polymyxa_B	NA	NA	NA
GCF_000146895.1	Mobiluncus mulieris	NA	NA	NA
GCF_000146975.1	Streptococcus pneumoniae	Clinical samples	2003	Western Europe
GCF_000147055.1	Dickeya dadantii	NA	NA	NA
GCF_000147075.1	Spirochaeta_A thermophila_A	NA	NA	NA
GCF_000147095.1	Streptococcus pneumoniae	NA	NA	NA
GCF_000147145.1	Cutibacterium acnes	NA	NA	NA
GCF_000147215.1	Enterococcus faecalis	NA	NA	NA
GCF_000147235.1	Enterococcus_B faecium	NA	NA	NA
GCF_000147255.1	Enterococcus faecalis	NA	NA	NA
GCF_000147275.1	Enterococcus faecalis	NA	NA	NA
GCF_000147295.1	Enterococcus faecalis	NA	NA	NA
GCF_000147315.1	Enterococcus_B faecium	NA	NA	NA
GCF_000147335.1	Cyanothece_B sp000147335	NA	NA	NA
GCF_000147355.1	Sulfurimonas autotrophica	NA	NA	NA
GCF_000147455.1	Enterococcus faecalis	NA	NA	NA
GCF_000147475.1	Enterococcus faecalis	NA	NA	NA
GCF_000147495.1	Enterococcus faecalis	NA	NA	NA
GCF_000147515.1	Enterococcus faecalis	NA	NA	NA
GCF_000147535.1	Enterococcus faecalis	NA	NA	NA
GCF_000147555.1	Enterococcus faecalis	NA	NA	NA
GCF_000147575.1	Enterococcus faecalis	NA	NA	NA
GCF_000147595.1	Enterococcus faecalis	NA	NA	NA
GCF_000147675.1	Peptostreptococcus stomatis	NA	NA	NA
GCF_000147695.2	Thermoanaerobacter wiegelii	NA	NA	NA
GCF_000147715.2	Mesotoga prima	NA	NA	NA
GCF_000147735.2	Shewanella baltica	NA	NA	NA
GCF_000147755.1	Escherichia flexneri	NA	NA	NA
GCF_000147775.2	Sinorhizobium meliloti_B	NA	NA	NA
GCF_000147795.2	Sinorhizobium meliloti_B	NA	NA	NA
GCF_000147815.2	Streptomyces violaceusniger	NA	NA	NA
GCF_000147835.2	Sphingobium chlorophenolicum	NA	NA	NA
GCF_000147855.2	Escherichia flexneri	NA	NA	NA
GCF_000147905.1	Enterococcus faecalis	NA	NA	NA
GCF_000147925.1	Enterococcus faecalis	NA	NA	NA
GCF_000147985.1	Enterococcus faecalis	NA	NA	NA
GCF_000148005.1	Enterococcus faecalis	NA	NA	NA
GCF_000148025.1	Enterococcus_B faecium	NA	NA	NA
GCF_000148045.1	Enterococcus faecalis	NA	NA	NA
GCF_000148065.1	Enterococcus faecalis	NA	NA	NA
GCF_000148085.1	Enterococcus faecalis	NA	NA	NA
GCF_000148105.1	Enterococcus faecalis	NA	NA	NA
GCF_000148125.1	Enterococcus faecalis	NA	NA	NA
GCF_000148145.1	Enterococcus_B faecium	NA	NA	NA
GCF_000148165.1	Enterococcus faecalis	NA	NA	NA
GCF_000148185.1	Enterococcus faecalis	NA	NA	NA
GCF_000148205.1	Enterococcus faecalis	NA	NA	NA
GCF_000148225.1	Enterococcus faecalis	NA	NA	NA
GCF_000148245.1	Enterococcus faecalis	NA	NA	NA
GCF_000148265.1	Enterococcus faecalis	NA	NA	NA
GCF_000148285.1	Enterococcus_B faecium	NA	NA	NA
GCF_000148305.1	Enterococcus faecalis	NA	NA	NA
GCF_000148325.1	Enterococcus_B faecium	NA	NA	NA
GCF_000148365.1	Escherichia coli	NA	NA	NA
GCF_000148405.1	Xylella fastidiosa	NA	NA	NA
GCF_000148425.1	Thermoanaerobacter pseudethanolicus	NA	NA	NA
GCF_000148445.1	Enterococcus faecalis	NA	NA	NA
GCF_000148465.1	Streptomyces clavuligerus	NA	NA	NA
GCF_000148485.1	Mobiluncus mulieris	NA	NA	NA
GCF_000148505.1	Streptococcus mitis_AK	NA	NA	NA
GCF_000148525.1	Streptococcus mitis_H	NA	NA	NA
GCF_000148545.1	Streptococcus mitis_C	NA	NA	NA
GCF_000148565.1	Streptococcus oralis	NA	NA	NA
GCF_000148585.1	Streptococcus mitis	NA	NA	NA
GCF_000148605.1	Escherichia coli	NA	NA	NA
GCF_000148625.1	Mycoplasmopsis fermentans	NA	NA	NA
GCF_000148645.1	Ferrimonas balearica	NA	NA	NA
GCF_000148665.1	Helicobacter pylori_BU	NA	NA	NA
GCF_000148685.1	Paraburkholderia sp000148685	NA	NA	NA
GCF_000148705.1	Campylobacter_D jejuni	NA	NA	NA
GCF_000148725.1	Labrenzia sp000148725	NA	NA	NA
GCF_000148745.1	Pseudomonas aeruginosa	NA	NA	NA
GCF_000148815.2	Lactobacillus_F plantarum	NA	NA	NA
GCF_000148855.1	Helicobacter pylori	NA	NA	NA
GCF_000148875.1	Helicobacter pylori_C	NA	NA	NA
GCF_000148895.1	Helicobacter pylori_C	NA	NA	NA
GCF_000148915.1	Helicobacter pylori_C	NA	NA	NA
GCF_000148935.1	Pantoea vagans_B	NA	NA	NA
GCF_000148975.1	Streptococcus pseudopneumoniae_M	NA	NA	NA
GCF_000148995.1	Listeria grayi	NA	NA	NA
GCF_000149015.1	Staphylococcus aureus	NA	NA	NA
GCF_000149065.1	Lactobacillus iners	NA	NA	NA
GCF_000149085.1	Lactobacillus iners	NA	NA	NA
GCF_000149105.1	Lactobacillus iners	NA	NA	NA
GCF_000149125.1	Lactobacillus iners	NA	NA	NA
GCF_000149145.1	Lactobacillus iners	NA	NA	NA
GCF_000149165.1	Bifidobacterium dentium	NA	NA	NA
GCF_000152065.2	Corynebacterium pseudotuberculosis	NA	NA	NA
GCF_000152105.1	Mycobacterium tuberculosis	NA	NA	NA
GCF_000152145.1	Oscillochloris trichoides	NA	NA	NA
GCF_000152165.1	Neisseria meningitidis_B	NA	NA	NA
GCF_000152185.1	Dermacoccus nishinomiyaensis	NA	NA	NA
GCF_000152245.2	Eubacterium callanderi	NA	NA	NA
GCF_000152285.1	Burkholderia thailandensis	NA	NA	NA
GCF_000152305.1	Burkholderia mallei	NA	NA	NA
GCF_000152325.1	Burkholderia mallei	NA	NA	NA
GCF_000152345.1	Burkholderia mallei	NA	NA	NA
GCF_000152365.1	Burkholderia mallei	NA	NA	NA
GCF_000152385.1	Burkholderia mallei	NA	NA	NA
GCF_000152405.1	Burkholderia mallei	NA	NA	NA
GCF_000152425.1	Vibrio cholerae	NA	NA	NA
GCF_000152445.1	Vibrio cholerae	NA	NA	NA
GCF_000152465.2	Vibrio cholerae	NA	NA	NA
GCF_000152485.1	Vibrio diabolicus	NA	NA	NA
GCF_000152525.1	Pseudomonas aeruginosa	NA	NA	NA
GCF_000152545.1	Pseudomonas aeruginosa	NA	NA	NA
GCF_000152585.1	Burkholderia dolosa	NA	NA	NA
GCF_000152605.1	Sulfitobacter pontiacus	NA	NA	NA
GCF_000152625.1	Roseovarius nubinhibens	NA	NA	NA
GCF_000152645.1	Sulfitobacter pontiacus	NA	NA	NA
GCF_000152685.2	Burkholderia mallei	NA	NA	NA
GCF_000152705.1	Knoellia sp000152705	NA	NA	NA
GCF_000152725.1	Pseudooceanicola batsensis	NA	NA	NA
GCF_000152745.1	Oceanicaulis sp000152745	NA	NA	NA
GCF_000152765.1	Vibrio splendidus	NA	NA	NA
GCF_000152785.1	Yoonia vestfoldensis_A	NA	NA	NA
GCF_000152805.1	Maritimibacter alkaliphilus	NA	NA	NA
GCF_000152825.2	Parvularcula bermudensis	NA	NA	NA
GCF_000152845.1	Roseovarius sp000152845	NA	NA	NA
GCF_000152865.1	Erythrobacter sp000152865	NA	NA	NA
GCF_000152885.1	Idiomarina baltica	NA	NA	NA
GCF_000152905.1	Nitrobacter sp000152905	NA	NA	NA
GCF_000152925.2	Dokdonia donghaensis	NA	NA	NA
GCF_000152945.2	Polaribacter sp000152945	NA	NA	NA
GCF_000152965.1	Pseudophaeobacter sp000152965	NA	NA	NA
GCF_000152985.1	Leeuwenhoekiella blandensis	NA	NA	NA
GCF_000153005.1	Vibrio tasmaniensis	NA	NA	NA
GCF_000153025.1	Marinomonas sp000153025	NA	NA	NA
GCF_000153045.1	WH-5701 sp000153045	NA	NA	NA
GCF_000153065.1	Synechococcus_C sp000153065	NA	NA	NA
GCF_000153085.1	Burkholderia mallei	NA	NA	NA
GCF_000153105.1	Blastopirellula marina	NA	NA	NA
GCF_000153125.2	Congregibacter litoralis	NA	NA	NA
GCF_000153145.1	Salinibacterium sp000153145	NA	NA	NA
GCF_000153165.2	Maribacter_A sp000153165	NA	NA	NA
GCF_000153185.1	Reinekea blandensis	NA	NA	NA
GCF_000153205.1	Nitrococcus mobilis	NA	NA	NA
GCF_000153225.1	Polaribacter irgensii	NA	NA	NA
GCF_000153245.1	Pseudoalteromonas tunicata	NA	NA	NA
GCF_000153265.1	Photobacterium angustum	NA	NA	NA
GCF_000153285.1	Synechococcus_C sp000153285	NA	NA	NA
GCF_000153305.1	Oceanicola granulosus	NA	NA	NA
GCF_000153325.1	Photobacterium sp000153325	NA	NA	NA
GCF_000153365.1	Bacillus_AB infantis	NA	NA	NA
GCF_000153385.1	Nonlabens sp000153385	NA	NA	NA
GCF_000153405.2	Psychromonas sp000153405	NA	NA	NA
GCF_000153425.1	Photobacterium profundum_B	NA	NA	NA
GCF_000153445.1	HTCC2207 sp000153445	NA	NA	NA
GCF_000153465.1	Aurantimonas manganoxydans	NA	NA	NA
GCF_000153485.2	Psychroflexus torquis	NA	NA	NA
GCF_000153505.1	Vibrio alginolyticus	NA	NA	NA
GCF_000153525.1	Pelagibacter ubique_R	NA	NA	NA
GCF_000153545.1	Sphingobium sp000153545	NA	NA	NA
GCF_000153565.1	Bermanella marisrubri	NA	NA	NA
GCF_000153605.1	Paenibacillus_H larvae	NA	NA	NA
GCF_000153625.3	Fusobacterium polymorphum	NA	NA	NA
GCF_000153645.1	Mannheimia haemolytica	NA	NA	NA
GCF_000153665.1	Staphylococcus aureus	NA	NA	NA
GCF_000153685.2	Mycobacterium tuberculosis	NA	NA	NA
GCF_000153705.1	Fulvimarina pelagi	NA	NA	NA
GCF_000153725.1	Salipiger bermudensis	NA	NA	NA
GCF_000153745.1	Amylibacter_A sp000153745	NA	NA	NA
GCF_000153765.1	Mariprofundus ferrooxydans	NA	NA	NA
GCF_000153785.2	Vibrio cholerae	NA	NA	NA
GCF_000153805.1	Synechococcus_C sp000153805	NA	NA	NA
GCF_000153825.1	Synechococcus_C sp000153825	NA	NA	NA
GCF_000153865.1	Vibrio cholerae	NA	NA	NA
GCF_000153885.1	Eubacterium_G ventriosum	NA	NA	NA
GCF_000153905.1	Blautia_A obeum	NA	NA	NA
GCF_000153925.1	Faecalicatena torques	NA	NA	NA
GCF_000153945.1	Vibrio cholerae	NA	NA	NA
GCF_000153965.1	Vibrio cholerae	NA	NA	NA
GCF_000153985.2	Vibrio cholerae	NA	NA	NA
GCF_000154005.2	Vibrio cholerae	NA	NA	NA
GCF_000154025.1	Vibrio campbellii	NA	NA	NA
GCF_000154065.1	Dorea longicatena	NA	NA	NA
GCF_000154085.1	Bifidobacterium adolescentis	NA	NA	NA
GCF_000154105.1	Parabacteroides merdae	NA	NA	NA
GCF_000154125.1	Bacteroides ovatus	NA	NA	NA
GCF_000154145.1	Francisella tularensis	NA	NA	NA
GCF_000154165.1	Francisella tularensis	NA	NA	NA
GCF_000154185.1	Francisella tularensis	NA	NA	NA
GCF_000154205.1	Bacteroides uniformis	NA	NA	NA
GCF_000154225.1	Pauljensenia odontolyticus_A	NA	NA	NA
GCF_000154245.1	Coprococcus sp000154245	NA	NA	NA
GCF_000154265.1	Francisella tularensis	NA	NA	NA
GCF_000154285.1	Absiella dolichum	NA	NA	NA
GCF_000154305.1	Anaerostipes caccae	NA	NA	NA
GCF_000154325.1	Ruminiclostridium_E siraeum	NA	NA	NA
GCF_000154345.1	Clostridium_A leptum	NA	NA	NA
GCF_000154365.1	Clostridium_M bolteae	NA	NA	NA
GCF_000154385.1	Faecalibacterium prausnitzii_K	NA	NA	NA
GCF_000154405.1	Parvimonas micra	NA	NA	NA
GCF_000154425.1	Coprococcus eutactus	NA	NA	NA
GCF_000154445.1	Intestinibacter bartlettii	NA	NA	NA
GCF_000154465.1	Alistipes putredinis	NA	NA	NA
GCF_000154485.1	Erysipelatoclostridium ramosum	NA	NA	NA
GCF_000154505.1	Dorea scindens	NA	NA	NA
GCF_000154525.1	Bacteroides stercoris	NA	NA	NA
GCF_000154545.1	Anaerostipes hadrus	NA	NA	NA
GCF_000154565.1	Anaerotruncus colihominis	NA	NA	NA
GCF_000154585.2	Mycobacterium tuberculosis	NA	NA	NA
GCF_000154605.2	Mycobacterium tuberculosis	NA	NA	NA
GCF_000154625.1	Clostridioides difficile	NA	NA	NA
GCF_000154645.1	Clostridioides difficile	Clinical samples	1988	USA
GCF_000154665.1	Clostridioides difficile	Clinical samples	2004	Canada
GCF_000154685.1	Clostridioides difficile	Clinical samples	2005	Canada
GCF_000154705.2	Hoeflea phototrophica	NA	NA	NA
GCF_000154725.1	Kordia algicida	NA	NA	NA
GCF_000154745.2	Phaeobacter inhibens	NA	NA	NA
GCF_000154765.2	Phaeobacter inhibens	NA	NA	NA
GCF_000154785.2	Roseobacter litoralis	NA	NA	NA
GCF_000154805.1	Erysipelatoclostridium spiroforme	NA	NA	NA
GCF_000154825.1	Anaerofustis stercorihominis	NA	NA	NA
GCF_000154845.1	Bacteroides_A coprocola	NA	NA	NA
GCF_000154865.1	Providencia stuartii_B	NA	NA	NA
GCF_000154885.1	Streptomyces sp000412265	NA	NA	NA
GCF_000154905.1	Streptomyces sp000154905	NA	NA	NA
GCF_000154945.1	Streptomyces pristinaespiralis	NA	NA	NA
GCF_000154965.1	Streptomyces sviceus	NA	NA	NA
GCF_000154985.1	Streptococcus infantarius	NA	NA	NA
GCF_000155025.1	Clostridioides difficile	NA	NA	NA
GCF_000155045.1	Clostridioides difficile	NA	NA	NA
GCF_000155065.1	Clostridioides difficile	NA	NA	NA
GCF_000155085.1	Clostridium_F botulinum_A	NA	NA	NA
GCF_000155105.1	Escherichia albertii	NA	NA	NA
GCF_000155125.1	Escherichia dysenteriae	NA	NA	NA
GCF_000155205.1	Faecalicatena lactaris	NA	NA	NA
GCF_000155325.1	Bacillus subtilis	NA	NA	NA
GCF_000155355.1	Bacillus subtilis	NA	NA	NA
GCF_000155375.1	Bacillus subtilis	NA	NA	NA
GCF_000155395.1	Bifidobacterium bifidum	NA	NA	NA
GCF_000155415.1	Bifidobacterium longum	NA	NA	NA
GCF_000155435.1	Clostridium_M sp000155435	NA	NA	NA
GCF_000155455.1	Helicobacter_D canadensis	NA	NA	NA
GCF_000155475.1	Helicobacter_C cinaedi	NA	NA	NA
GCF_000155495.1	Helicobacter_D pullorum	NA	NA	NA
GCF_000155515.2	Lactobacillus_C paracasei	NA	NA	NA
GCF_000155535.1	Francisella tularensis	NA	NA	NA
GCF_000155555.1	Coleofasciculus chthonoplastes	NA	NA	NA
GCF_000155575.1	Brevundimonas sp000155575	NA	NA	NA
GCF_000155595.1	Phormidesmis sp000155595	NA	NA	NA
GCF_000155615.1	Alcanivorax sp000155615	NA	NA	NA
GCF_000155635.1	PCC7001 sp000155635	NA	NA	NA
GCF_000155655.1	Nitrosococcus oceani	NA	NA	NA
GCF_000155675.2	Octadecabacter antarcticus	NA	NA	NA
GCF_000155695.1	DG1235 sp000155695	NA	NA	NA
GCF_000155715.1	HTCC5015 sp000155715	NA	NA	NA
GCF_000155735.2	Octadecabacter arcticus	NA	NA	NA
GCF_000155755.1	Francisella tularensis	NA	NA	NA
GCF_000155775.1	Glaciecola sp000155775	NA	NA	NA
GCF_000155795.1	Mycobacterium tuberculosis	NA	NA	NA
GCF_000155815.1	Bacteroides eggerthii	NA	NA	NA
GCF_000155855.1	Bacteroides_F pectinophilus	NA	NA	NA
GCF_000155875.1	Coprococcus_B comes	NA	NA	NA
GCF_000155895.1	Pelagibacter sp000155895	NA	NA	NA
GCF_000155915.2	Lactobacillus jensenii	NA	NA	NA
GCF_000155935.2	Lactobacillus gasseri	NA	NA	NA
GCF_000155955.1	Mitsuokella multacida	NA	NA	NA
GCF_000155975.1	Citrobacter portucalensis_A	NA	NA	NA
GCF_000155995.1	Enterobacter cancerogenus	NA	NA	NA
GCF_000156015.1	Butyrivibrio_A crossotus	NA	NA	NA
GCF_000156055.1	Clostridium_U hiranonis	NA	NA	NA
GCF_000156075.1	Bacteroides_B dorei	NA	NA	NA
GCF_000156095.1	Sulfurimonas gotlandica	NA	NA	NA
GCF_000156115.1	Planktotalea sp000156115	NA	NA	NA
GCF_000156135.1	Leisingera daeponensis	NA	NA	NA
GCF_000156155.1	BACL14 sp000156155	NA	NA	NA
GCF_000156175.1	Collinsella intestinalis	NA	NA	NA
GCF_000156195.1	Bacteroides finegoldii	NA	NA	NA
GCF_000156215.1	Collinsella stercoris	NA	NA	NA
GCF_000156235.1	Pseudovibrio denitrificans	NA	NA	NA
GCF_000156255.1	Phaeobacter italicus	NA	NA	NA
GCF_000156275.2	Caldanaerobacter subterraneus	NA	NA	NA
GCF_000156295.1	Halioglobus sp000156295	NA	NA	NA
GCF_000156335.1	Sulfitobacter sp000156335	NA	NA	NA
GCF_000156355.1	Methylophaga thiooxydans	NA	NA	NA
GCF_000156375.1	Desulfovibrio piger	NA	NA	NA
GCF_000156395.1	Providencia rustigianii	NA	NA	NA
GCF_000156415.1	Francisella tularensis	NA	NA	NA
GCF_000156435.1	Streptomyces viridosporus	NA	NA	NA
GCF_000156455.1	Streptomyces filamentosus	NA	NA	NA
GCF_000156475.1	Streptomyces albidoflavus	NA	NA	NA
GCF_000156495.1	Parabacteroides johnsonii	NA	NA	NA
GCF_000156515.1	Dorea hylemonae	NA	NA	NA
GCF_000156535.1	Roseburia intestinalis	NA	NA	NA
GCF_000156555.1	Acinetobacter haemolyticus	NA	NA	NA
GCF_000156575.1	Anaerococcus lactolyticus	NA	NA	NA
GCF_000156595.1	Corynebacterium glucuronolyticum	NA	NA	NA
GCF_000156615.2	Corynebacterium pseudogenitalium	NA	NA	NA
GCF_000156635.1	Bifidobacterium angulatum	NA	NA	NA
GCF_000156655.1	Holdemanella biformis	NA	NA	NA
GCF_000156675.1	Blautia hansenii	NA	NA	NA
GCF_000156695.2	Streptomyces filamentosus	NA	NA	NA
GCF_000156715.1	Francisella philomiragia	NA	NA	NA
GCF_000156735.1	Wolbachia sp000376585	NA	NA	NA
GCF_000156755.1	Neisseria gonorrhoeae	NA	NA	NA
GCF_000156775.1	Neisseria gonorrhoeae	NA	NA	NA
GCF_000156795.1	Neisseria gonorrhoeae	NA	NA	NA
GCF_000156815.1	Neisseria gonorrhoeae	NA	NA	NA
GCF_000156835.2	Neisseria gonorrhoeae	NA	NA	NA
GCF_000156855.2	Neisseria gonorrhoeae	NA	NA	NA
GCF_000156875.1	Neisseria gonorrhoeae	NA	NA	NA
GCF_000156895.1	Neisseria gonorrhoeae	NA	NA	NA
GCF_000156915.1	Neisseria gonorrhoeae	NA	NA	NA
GCF_000156935.1	Neisseria gonorrhoeae	NA	NA	NA
GCF_000156955.1	Neisseria gonorrhoeae	NA	NA	NA
GCF_000156975.1	Neisseria gonorrhoeae	NA	NA	NA
GCF_000157015.1	Bacteroides fragilis_A	NA	NA	NA
GCF_000157035.2	Parabacteroides distasonis	NA	NA	NA
GCF_000157055.1	Bacteroides ovatus	NA	NA	NA
GCF_000157075.2	Bacteroides_B dorei	NA	NA	NA
GCF_000157095.2	Bacteroides xylanisolvens	NA	NA	NA
GCF_000157115.2	Escherichia coli	NA	NA	NA
GCF_000157135.1	Enterococcus faecalis	NA	NA	NA
GCF_000157155.1	Enterococcus faecalis	NA	NA	NA
GCF_000157175.1	Enterococcus faecalis	NA	NA	NA
GCF_000157195.1	Enterococcus faecalis	NA	NA	NA
GCF_000157215.1	Enterococcus_D casseliflavus	NA	NA	NA
GCF_000157235.1	Enterococcus faecalis	NA	NA	NA
GCF_000157255.1	Enterococcus_D gallinarum	NA	NA	NA
GCF_000157275.1	Enterococcus faecalis	NA	NA	NA
GCF_000157295.1	Enterococcus_D casseliflavus	NA	NA	NA
GCF_000157315.1	Enterococcus faecalis	NA	NA	NA
GCF_000157335.1	Enterococcus faecalis	NA	NA	NA
GCF_000157355.2	Enterococcus_D casseliflavus	NA	NA	NA
GCF_000157375.1	Enterococcus faecalis	NA	NA	NA
GCF_000157395.1	Enterococcus faecalis	NA	NA	NA
GCF_000157415.1	Enterococcus faecalis	NA	NA	NA
GCF_000157435.1	Enterococcus_B faecium	NA	NA	NA
GCF_000157455.1	Enterococcus faecalis	NA	NA	NA
GCF_000157475.1	Enterococcus faecalis	NA	NA	NA
GCF_000157495.1	Enterococcus faecalis	NA	NA	NA
GCF_000157515.1	Enterococcus faecalis	NA	NA	NA
GCF_000157535.1	Enterococcus_B faecium	NA	NA	NA
GCF_000157555.1	Enterococcus_B faecium	NA	NA	NA
GCF_000157575.1	Enterococcus_B faecium_B	NA	NA	NA
GCF_000157595.1	Enterococcus_B faecium	NA	NA	NA
GCF_000157615.1	Enterococcus_B faecium	NA	NA	NA
GCF_000157635.1	Enterococcus_B faecium_B	NA	NA	NA
GCF_000157655.1	Enterococcus_B faecium_B	NA	NA	NA
GCF_000157675.1	Brucella melitensis	NA	NA	NA
GCF_000157695.1	Brucella melitensis	NA	NA	NA
GCF_000157715.1	Brucella melitensis	NA	NA	NA
GCF_000157735.1	Brucella melitensis	NA	NA	NA
GCF_000157755.1	Brucella melitensis	NA	NA	NA
GCF_000157775.1	Brucella melitensis	NA	NA	NA
GCF_000157795.1	Brucella melitensis	NA	NA	NA
GCF_000157815.1	Brucella melitensis	NA	NA	NA
GCF_000157835.1	Brucella melitensis	NA	NA	NA
GCF_000157855.1	Brucella melitensis	NA	NA	NA
GCF_000157875.1	Brucella melitensis	NA	NA	NA
GCF_000157895.3	Mycobacterium kansasii	NA	NA	NA
GCF_000157915.1	Bacteroides_A coprophilus	NA	NA	NA
GCF_000157935.1	Prevotella copri	NA	NA	NA
GCF_000157955.1	Gemmiger variabile	NA	NA	NA
GCF_000157975.1	Blautia_A hydrogenotrophica	NA	NA	NA
GCF_000157995.1	Holdemania filiformis	NA	NA	NA
GCF_000158015.1	Bifidobacterium breve	NA	NA	NA
GCF_000158035.1	Bacteroides cellulosilyticus	NA	NA	NA
GCF_000158055.1	Providencia rettgeri_D	NA	NA	NA
GCF_000158075.1	Clostridium_M asparagiforme	NA	NA	NA
GCF_000158115.1	Vibrio sinaloensis_A	NA	NA	NA
GCF_000158135.1	Ruegeria sp000158135	NA	NA	NA
GCF_000158155.1	Congregibacter sp000158155	NA	NA	NA
GCF_000158175.1	Luminiphilus syltensis	NA	NA	NA
GCF_000158195.2	Fusobacterium_A mortiferum	NA	NA	NA
GCF_000158215.3	Fusobacterium periodonticum_D	NA	NA	NA
GCF_000158235.1	Fusobacterium_C gonidiaformans	NA	NA	NA
GCF_000158255.2	Fusobacterium vincentii	NA	NA	NA
GCF_000158275.2	Fusobacterium animalis	NA	NA	NA
GCF_000158315.2	Fusobacterium_A ulcerans	NA	NA	NA
GCF_000158335.2	Bacteroides_B dorei	NA	NA	NA
GCF_000158355.2	Citrobacter portucalensis	NA	NA	NA
GCF_000158375.2	Clostridium tertium	NA	NA	NA
GCF_000158395.1	Escherichia flexneri	NA	NA	NA
GCF_000158415.2	Escherichia flexneri	NA	NA	NA
GCF_000158435.2	Helicobacter_A rappini	NA	NA	NA
GCF_000158455.1	Helicobacter_D winghamensis	NA	NA	NA
GCF_000158475.2	Oxalobacter formigenes_B	NA	NA	NA
GCF_000158495.1	Oxalobacter formigenes_A	NA	NA	NA
GCF_000158515.2	Bacteroides_B vulgatus	NA	NA	NA
GCF_000158535.2	Fusobacterium animalis	NA	NA	NA
GCF_000158555.2	Erysipelatoclostridium ramosum	NA	NA	NA
GCF_000158575.1	Stenotrophomonas maltophilia_AJ	NA	NA	NA
GCF_000158595.1	Prochlorococcus_A marinus_A	NA	NA	NA
GCF_000158615.1	Eikenella corrodens	NA	NA	NA
GCF_000158635.1	Corynebacterium matruchotii	NA	NA	NA
GCF_000158655.1	Massilioclostridium methylpentosum	NA	NA	NA
GCF_000158675.1	Brucella melitensis	NA	NA	NA
GCF_000158695.1	Brucella melitensis	NA	NA	NA
GCF_000158715.1	Brucella melitensis	NA	NA	NA
GCF_000158735.1	Brucella melitensis	NA	NA	NA
GCF_000158755.1	Brucella melitensis	NA	NA	NA
GCF_000158775.1	Brucella melitensis	NA	NA	NA
GCF_000158795.1	Brucella melitensis	NA	NA	NA
GCF_000158815.1	Micromonospora sp000158815	NA	NA	NA
GCF_000158835.2	Fusobacterium_C gonidiaformans	NA	NA	NA
GCF_000158855.1	Streptomyces sp000213055	NA	NA	NA
GCF_000158875.1	Amycolatopsis sp002796545	NA	NA	NA
GCF_000158895.1	Streptomyces sp000158895	NA	NA	NA
GCF_000158915.1	Streptomyces himastatinicus	NA	NA	NA
GCF_000158935.1	Streptomyces coelicolor	NA	NA	NA
GCF_000158955.1	Streptomyces viridochromogenes_B	NA	NA	NA
GCF_000158975.1	Streptomyces griseoflavus	NA	NA	NA
GCF_000158995.1	Brucella melitensis	NA	NA	NA
GCF_000159015.1	Gleimia coleocanis	NA	NA	NA
GCF_000159035.1	Actinomyces urogenitalis	NA	NA	NA
GCF_000159055.1	Clostridium_Q saccharolyticum	NA	NA	NA
GCF_000159075.2	Bacteroides ovatus	NA	NA	NA
GCF_000159095.1	Anaerococcus tetradius	NA	NA	NA
GCF_000159115.1	Corynebacterium accolens	NA	NA	NA
GCF_000159135.1	Corynebacterium striatum	NA	NA	NA
GCF_000159155.2	Bifidobacterium vaginale	NA	NA	NA
GCF_000159175.1	Lactobacillus_G hilgardii	NA	NA	NA
GCF_000159195.1	Lactobacillus_G hilgardii	NA	NA	NA
GCF_000159215.1	Lactobacillus_H fermentum	NA	NA	NA
GCF_000159235.2	Fannyhessea vaginae	NA	NA	NA
GCF_000159255.1	Enterococcus faecalis	NA	NA	NA
GCF_000159275.1	Enterococcus faecalis	NA	NA	NA
GCF_000159295.1	Escherichia coli	NA	NA	NA
GCF_000159315.1	Lactobacillus_G hilgardii	NA	NA	NA
GCF_000159335.1	Lactobacillus jensenii_A	NA	NA	NA
GCF_000159355.1	Lactobacillus johnsonii	NA	NA	NA
GCF_000159375.2	Lactobacillus_B ruminis	NA	NA	NA
GCF_000159395.1	Lactobacillus_B salivarius	NA	NA	NA
GCF_000159415.1	Lactobacillus ultunensis	NA	NA	NA
GCF_000159435.1	Lactobacillus_H vaginalis	NA	NA	NA
GCF_000159455.2	Lactobacillus_H reuteri	NA	NA	NA
GCF_000159475.2	Lactobacillus_H reuteri	NA	NA	NA
GCF_000159495.1	Lactobacillus_C paracasei	NA	NA	NA
GCF_000159515.1	Sphingobacterium spiritivorum_A	NA	NA	NA
GCF_000159535.2	Staphylococcus aureus	NA	NA	NA
GCF_000159555.1	Staphylococcus aureus	NA	NA	NA
GCF_000159575.1	Staphylococcus epidermidis	NA	NA	NA
GCF_000159595.1	Corynebacterium glucuronolyticum	NA	NA	NA
GCF_000159615.1	Lactobacillus_H reuteri	NA	NA	NA
GCF_000159635.1	Corynebacterium lipophiloflavum	NA	NA	NA
GCF_000159655.1	Enterococcus faecalis	NA	NA	NA
GCF_000159675.1	Enterococcus_B faecium_B	NA	NA	NA
GCF_000159695.1	Finegoldia magna_F	NA	NA	NA
GCF_000159715.1	Lactobacillus acidophilus	NA	NA	NA
GCF_000159755.1	Mycobacterium tuberculosis	NA	NA	NA
GCF_000159775.1	Mycobacterium tuberculosis	NA	NA	NA
GCF_000159795.2	Xanthomonas vasicola	NA	NA	NA
GCF_000159835.2	Pseudomonas_E ficuserectae	NA	NA	NA
GCF_000159855.2	Bacteroides fragilis	NA	NA	NA
GCF_000159875.2	Bacteroides thetaiotaomicron	NA	NA	NA
GCF_000159895.2	Escherichia flexneri	NA	NA	NA
GCF_000159915.2	Fusobacterium_A varium_B	NA	NA	NA
GCF_000159935.1	Neisseria gonorrhoeae	NA	NA	NA
GCF_000159955.1	Paenibacillus_A sp000159955	NA	NA	NA
GCF_000159975.2	Blautia_A wexlerae	NA	NA	NA
GCF_000159995.1	Alloprevotella tannerae	NA	NA	NA
GCF_000160015.1	Veillonella dispar	NA	NA	NA
GCF_000160035.2	Catonella morbi	NA	NA	NA
GCF_000160055.1	Dialister invisus	NA	NA	NA
GCF_000160075.2	Abiotrophia defectiva	NA	NA	NA
GCF_000160095.1	Hungatella hathewayi	NA	NA	NA
GCF_000160115.1	Shuttleworthia satelles	NA	NA	NA
GCF_000160135.1	Oribacterium sp000160135	NA	NA	NA
GCF_000160155.1	Enterococcus faecalis	NA	NA	NA
GCF_000160175.1	Lactobacillus_C rhamnosus	NA	NA	NA
GCF_000160195.1	Staphylococcus aureus	NA	NA	NA
GCF_000160215.1	Staphylococcus caprae	NA	NA	NA
GCF_000160235.1	Staphylococcus epidermidis	NA	NA	NA
GCF_000160255.1	Brucella melitensis	NA	NA	NA
GCF_000160275.1	Brucella melitensis	NA	NA	NA
GCF_000160295.1	Brucella melitensis	NA	NA	NA
GCF_000160315.2	Enterococcus_B faecium	NA	NA	NA
GCF_000160335.2	Staphylococcus aureus	NA	NA	NA
GCF_000160355.1	Staphylococcus aureus	NA	NA	NA
GCF_000160375.1	Staphylococcus aureus	NA	NA	NA
GCF_000160395.1	Staphylococcus aureus	NA	NA	NA
GCF_000160415.1	Staphylococcus aureus	NA	NA	NA
GCF_000160435.1	Kingella_B oralis	NA	NA	NA
GCF_000160455.2	Acetomicrobium hydrogeniformans	NA	NA	NA
GCF_000160475.1	Fusobacterium periodonticum	NA	NA	NA
GCF_000160495.1	Selenomonas sputigena	NA	NA	NA
GCF_000160515.1	Lactobacillus crispatus	NA	NA	NA
GCF_000160535.1	Prevotella bergensis	NA	NA	NA
GCF_000160555.1	Centipeda noxia	NA	NA	NA
GCF_000160575.1	Weissella paramesenteroides	NA	NA	NA
GCF_000160595.1	Leuconostoc mesenteroides	NA	NA	NA
GCF_000160615.1	Mobiluncus mulieris	NA	NA	NA
GCF_000160635.1	Oribacterium sinus	NA	NA	NA
GCF_000160655.1	Cardiobacterium hominis	NA	NA	NA
GCF_000160675.1	Granulicatella adiacens	NA	NA	NA
GCF_000160695.1	Centipeda flueggei	NA	NA	NA
GCF_000160715.1	Lactobacillus_H reuteri	NA	NA	NA
GCF_000160735.1	Rickettsia buchneri	NA	NA	NA
GCF_000160755.1	Proteus mirabilis	NA	NA	NA
GCF_000160775.2	Aeromicrobium marinum	NA	NA	NA
GCF_000160795.1	Corynebacterium efficiens	NA	NA	NA
GCF_000160815.2	Erysipelothrix rhusiopathiae	NA	NA	NA
GCF_000160835.1	Lactobacillus_H antri	NA	NA	NA
GCF_000160855.1	Lactobacillus helveticus	NA	NA	NA
GCF_000160875.1	Lactobacillus iners	NA	NA	NA
GCF_000160895.1	Bacillus_A thuringiensis_J	NA	NA	NA
GCF_000160915.1	Bacillus_A anthracis	NA	NA	NA
GCF_000160935.1	Bacillus_A thuringiensis_J	NA	NA	NA
GCF_000160955.1	Bacillus_A wiedmannii	NA	NA	NA
GCF_000160975.1	Bacillus_A mycoides	NA	NA	NA
GCF_000161015.1	Bacillus_A cereus_T	NA	NA	NA
GCF_000161035.1	Bacillus_A cereus	NA	NA	NA
GCF_000161055.1	Bacillus_A cereus	NA	NA	NA
GCF_000161075.1	Bacillus_A cereus_AD	NA	NA	NA
GCF_000161095.1	Bacillus_A mycoides	NA	NA	NA
GCF_000161115.1	Bacillus_A cereus	NA	NA	NA
GCF_000161135.1	Bacillus_A anthracis	NA	NA	NA
GCF_000161155.1	Bacillus_A toyonensis	NA	NA	NA
GCF_000161175.1	Bacillus_A cereus	NA	NA	NA
GCF_000161195.1	Bacillus_A toyonensis	NA	NA	NA
GCF_000161215.1	Bacillus_A toyonensis	NA	NA	NA
GCF_000161235.1	Bacillus_A anthracis	NA	NA	NA
GCF_000161255.1	Bacillus_A cereus_S	NA	NA	NA
GCF_000161275.1	Bacillus_A thuringiensis_J	NA	NA	NA
GCF_000161295.1	Bacillus_A toyonensis	NA	NA	NA
GCF_000161315.1	Bacillus_A thuringiensis_J	NA	NA	NA
GCF_000161335.1	Bacillus_A mycoides	NA	NA	NA
GCF_000161355.1	Bacillus_A cereus	NA	NA	NA
GCF_000161375.1	Bacillus_A cereus_AX	NA	NA	NA
GCF_000161395.1	Bacillus_A cereus_P	NA	NA	NA
GCF_000161415.1	Bacillus_A pseudomycoides	NA	NA	NA
GCF_000161435.1	Bacillus_A pseudomycoides	NA	NA	NA
GCF_000161455.1	Bacillus_A pseudomycoides	NA	NA	NA
GCF_000161495.1	Bacillus_A thuringiensis	NA	NA	NA
GCF_000161515.1	Bacillus_A thuringiensis	NA	NA	NA
GCF_000161555.1	Bacillus_A cereus	NA	NA	NA
GCF_000161575.1	Bacillus_A thuringiensis_J	NA	NA	NA
GCF_000161595.1	Bacillus_A anthracis	NA	NA	NA
GCF_000161615.1	Bacillus_A thuringiensis	NA	NA	NA
GCF_000161635.1	Bacillus_A anthracis	NA	NA	NA
GCF_000161655.1	Bacillus_A anthracis	NA	NA	NA
GCF_000161675.1	Bacillus_A thuringiensis_K	NA	NA	NA
GCF_000161695.1	Bacillus_A anthracis	NA	NA	NA
GCF_000161715.1	Bacillus_A thuringiensis_S	NA	NA	NA
GCF_000161735.1	Bacillus_A thuringiensis_S	NA	NA	NA
GCF_000161755.1	Salipiger thiooxidans	NA	NA	NA
GCF_000161775.1	Ruegeria lacuscaerulensis	NA	NA	NA
GCF_000161795.2	Synechococcus_C sp000161795	NA	NA	NA
GCF_000161815.1	Tritonibacter mobile	NA	NA	NA
GCF_000161835.1	R2A62 sp000161835	NA	NA	NA
GCF_000161855.1	Enterococcus_B faecium	NA	NA	NA
GCF_000161875.1	Enterococcus faecalis	NA	NA	NA
GCF_000161895.2	Lactobacillus jensenii_A	NA	NA	NA
GCF_000161915.2	Lactobacillus crispatus	NA	NA	NA
GCF_000161935.1	Lactobacillus_H coleohominis	NA	NA	NA
GCF_000161955.2	Streptococcus gordonii	NA	NA	NA
GCF_000161975.1	Eubacterium_N saphenum	NA	NA	NA
GCF_000161995.1	Jonquetella anthropi	NA	NA	NA
GCF_000162015.1	Faecalibacterium prausnitzii_C	NA	NA	NA
GCF_000162035.1	Acinetobacter calcoaceticus	NA	NA	NA
GCF_000162055.1	Acinetobacter johnsonii	NA	NA	NA
GCF_000162075.1	Acinetobacter junii	NA	NA	NA
GCF_000162095.1	Acinetobacter fasciculus	NA	NA	NA
GCF_000162115.1	Acinetobacter radioresistens	NA	NA	NA
GCF_000162135.1	Bacteroides fragilis	NA	NA	NA
GCF_000162155.1	Bacteroides xylanisolvens	NA	NA	NA
GCF_000162175.1	Parabacteroides distasonis	NA	NA	NA
GCF_000162195.1	Bacteroides_B dorei	NA	NA	NA
GCF_000162215.1	Bacteroides uniformis	NA	NA	NA
GCF_000162235.2	Fusobacterium vincentii	NA	NA	NA
GCF_000162255.1	Lactobacillus crispatus	NA	NA	NA
GCF_000162275.1	Parabacteroides distasonis	NA	NA	NA
GCF_000162295.1	Acinetobacter baumannii	NA	NA	NA
GCF_000162315.1	Lactobacillus crispatus	NA	NA	NA
GCF_000162335.1	Lactobacillus jensenii	NA	NA	NA
GCF_000162355.2	Fusobacterium animalis	NA	NA	NA
GCF_000162375.2	Acinetobacter nosocomialis	NA	NA	NA
GCF_000162395.1	Lactobacillus_H fermentum	NA	NA	NA
GCF_000162415.1	Prevotella conceptionensis	NA	NA	NA
GCF_000162435.1	Lactobacillus jensenii_A	NA	NA	NA
GCF_000162455.1	Prevotella buccae	NA	NA	NA
GCF_000162475.2	Granulicatella elegans	NA	NA	NA
GCF_000162495.1	Streptococcus dentisani	NA	NA	NA
GCF_000162515.1	Bacteroides thetaiotaomicron	NA	NA	NA
GCF_000162535.1	Parabacteroides distasonis	NA	NA	NA
GCF_000162555.1	Bacteroides ovatus	NA	NA	NA
GCF_000162575.1	Helicobacter_D canadensis	NA	NA	NA
GCF_000162595.1	Staphylococcus aureus	NA	NA	NA
GCF_000162615.1	Staphylococcus aureus	NA	NA	NA
GCF_000162635.1	Staphylococcus aureus	NA	NA	NA
GCF_000162655.1	Staphylococcus aureus	NA	NA	NA
GCF_000162675.1	Staphylococcus aureus	NA	NA	NA
GCF_000162695.1	Staphylococcus aureus	NA	NA	NA
GCF_000162715.1	Staphylococcus aureus	NA	NA	NA
GCF_000162735.1	Staphylococcus aureus	NA	NA	NA
GCF_000162755.2	Legionella drancourtii	NA	NA	NA
GCF_000162775.1	Streptomyces sp000383935	NA	NA	NA
GCF_000162795.1	Staphylococcus aureus	NA	NA	NA
GCF_000162815.1	Staphylococcus aureus	NA	NA	NA
GCF_000162835.1	Staphylococcus aureus	NA	NA	NA
GCF_000162855.1	Staphylococcus aureus	NA	NA	NA
GCF_000162875.1	Slackia exigua	NA	NA	NA
GCF_000162895.1	F0332 sp001652275	NA	NA	NA
GCF_000162915.1	Prevotella oris	NA	NA	NA
GCF_000162935.1	Prevotella veroralis	NA	NA	NA
GCF_000162955.1	Leptotrichia hofstadii	NA	NA	NA
GCF_000162975.1	Mycobacterium tuberculosis	NA	NA	NA
GCF_000162995.1	Mycobacterium tuberculosis	NA	NA	NA
GCF_000163015.1	Mycobacterium tuberculosis	NA	NA	NA
GCF_000163035.1	Prevotella melaninogenica	NA	NA	NA
GCF_000163055.2	Prevotella sp000163055	NA	NA	NA
GCF_000163075.1	Klebsiella variicola	NA	NA	NA
GCF_000163095.1	Pediococcus acidilactici	NA	NA	NA
GCF_000163115.1	Brucella melitensis	NA	NA	NA
GCF_000163135.1	Brucella melitensis	NA	NA	NA
GCF_000163155.1	Escherichia flexneri	NA	NA	NA
GCF_000163175.1	Escherichia dysenteriae	NA	NA	NA
GCF_000163195.1	Escherichia coli_D	NA	NA	NA
GCF_000163215.1	Escherichia coli_D	NA	NA	NA
GCF_000163235.1	Escherichia coli_D	NA	NA	NA
GCF_000163255.1	Pseudomonas_E ficuserectae	NA	NA	NA
GCF_000163275.1	Pseudomonas_E ficuserectae	NA	NA	NA
GCF_000163295.1	Anaerococcus vaginalis	NA	NA	NA
GCF_000163335.1	Staphylococcus aureus	NA	NA	NA
GCF_000163355.2	Acinetobacter baumannii	NA	NA	NA
GCF_000163375.2	Acinetobacter baumannii	NA	NA	NA
GCF_000163395.2	Acinetobacter baumannii	NA	NA	NA
GCF_000163415.1	Pauljensenia odontolyticus_A	NA	NA	NA
GCF_000163435.1	Corynebacterium jeikeium	NA	NA	NA
GCF_000163455.1	Klebsiella pneumoniae	NA	NA	NA
GCF_000163475.1	Pasteurella dagmatis	NA	NA	NA
GCF_000163495.1	Prevotella loescheii	NA	NA	NA
GCF_000163515.2	Absiella sp000163515	NA	NA	NA
GCF_000163535.1	Neisseria gonorrhoeae	NA	NA	NA
GCF_000163555.2	HIMB114 sp000163555	NA	NA	NA
GCF_000163575.1	Staphylococcus aureus	NA	NA	NA
GCF_000163595.1	Serratia_B odorifera	NA	NA	NA
GCF_000163615.3	Aggregatibacter actinomycetemcomitans	NA	NA	NA
GCF_000163635.1	Acinetobacter pittii	NA	NA	NA
GCF_000163655.1	Parabacteroides distasonis	NA	NA	NA
GCF_000163675.1	Bacteroides xylanisolvens	NA	NA	NA
GCF_000163695.1	F0058 sp000163695	NA	NA	NA
GCF_000163715.1	Veillonella parvula_A	NA	NA	NA
GCF_000163735.1	Veillonella parvula_A	NA	NA	NA
GCF_000163755.1	Scardovia inopinata	NA	NA	NA
GCF_000163775.2	Simonsiella muelleri	NA	NA	NA
GCF_000163795.1	Enterococcus faecalis	NA	NA	NA
GCF_000163815.1	Enterococcus faecalis	NA	NA	NA
GCF_000163835.1	Parascardovia denticolens	NA	NA	NA
GCF_000163875.1	Streptomyces clavuligerus	NA	NA	NA
GCF_000163895.2	Filifactor alocis	NA	NA	NA
GCF_000163915.2	Fusobacterium vincentii	NA	NA	NA
GCF_000163935.1	Fusobacterium periodonticum_B	NA	NA	NA
GCF_000163955.1	Edwardsiella tarda	NA	NA	NA
GCF_000163975.1	Campylobacter_D jejuni	NA	NA	NA
GCF_000164015.3	Pseudomonas_E ficuserectae	NA	NA	NA
GCF_000164035.1	Achromobacter piechaudii	NA	NA	NA
GCF_000164055.1	Acinetobacter haemolyticus	NA	NA	NA
GCF_000164075.1	Staphylococcus epidermidis	NA	NA	NA
GCF_000164095.1	Streptococcus oralis	NA	NA	NA
GCF_000164115.1	Corynebacterium ammoniagenes	NA	NA	NA
GCF_000164135.1	Mycobacterium parascrofulaceum	NA	NA	NA
GCF_000164155.2	Rhodococcus hoagii	NA	NA	NA
GCF_000164175.1	Clostridioides difficile	NA	NA	NA
GCF_000164195.1	Escherichia coli_D	NA	NA	NA
GCF_000164215.1	Escherichia flexneri	NA	NA	NA
GCF_000164235.1	Escherichia flexneri	NA	NA	NA
GCF_000164255.1	Escherichia flexneri	NA	NA	NA
GCF_000164275.1	Escherichia flexneri	NA	NA	NA
GCF_000164295.1	Escherichia coli	NA	NA	NA
GCF_000164315.1	Escherichia coli_D	NA	NA	NA
GCF_000164335.1	Escherichia flexneri	NA	NA	NA
GCF_000164355.1	Escherichia coli_D	NA	NA	NA
GCF_000164375.1	Escherichia flexneri	NA	NA	NA
GCF_000164395.1	Komagataeibacter hansenii	NA	NA	NA
GCF_000164415.1	Escherichia coli	NA	NA	NA
GCF_000164435.1	Escherichia coli	NA	NA	NA
GCF_000164455.1	Escherichia flexneri	NA	NA	NA
GCF_000164475.1	Escherichia flexneri	NA	NA	NA
GCF_000164495.1	Escherichia coli	NA	NA	NA
GCF_000164515.1	Escherichia flexneri	NA	NA	NA
GCF_000164535.1	Escherichia coli	NA	NA	NA
GCF_000164555.1	Escherichia flexneri	NA	NA	NA
GCF_000164575.1	Escherichia coli	NA	NA	NA
GCF_000164595.1	Escherichia coli	NA	NA	NA
GCF_000164615.1	Escherichia coli	NA	NA	NA
GCF_000164635.1	Roseomonas cervicalis	NA	NA	NA
GCF_000164655.1	Clostridioides difficile	NA	NA	NA
GCF_000164675.2	Streptococcus parasanguinis	NA	NA	NA
GCF_000164695.2	Rothia dentocariosa	NA	NA	NA
GCF_000164715.1	Staphylococcus aureus	NA	NA	NA
GCF_000164865.1	Enterobacter_B lignolyticus	NA	NA	NA
GCF_000164885.1	Ketogulonicigenium vulgare	NA	NA	NA
GCF_000164905.1	Hydrogenobacter thermophilus	NA	NA	NA
GCF_000164925.1	Escherichia dysenteriae	NA	NA	NA
GCF_000164965.1	Bifidobacterium bifidum	NA	NA	NA
GCF_000164985.3	Paenibacillus polymyxa_C	NA	NA	NA
GCF_000165065.1	Absiella sp000165065	NA	NA	NA
GCF_000165085.1	Ralstonia pickettii	NA	NA	NA
GCF_000165125.1	Vibrio caribbeanicus	NA	NA	NA
GCF_000165465.1	Halanaerobium praevalens	NA	NA	NA
GCF_000165485.1	Stigmatella aurantiaca_A	NA	NA	NA
GCF_000165505.1	Ilyobacter polytropus	NA	NA	NA
GCF_000165525.1	Haemophilus influenzae	NA	NA	NA
GCF_000165575.1	Haemophilus influenzae	NA	NA	NA
GCF_000165595.2	Borreliella afzelii	NA	NA	NA
GCF_000165615.1	Bifidobacterium vaginale_C	NA	NA	NA
GCF_000165635.1	Bifidobacterium vaginale	NA	NA	NA
GCF_000165655.1	Escherichia flexneri	NA	NA	NA
GCF_000165675.1	Leuconostoc_A fallax	NA	NA	NA
GCF_000165695.1	Mycobacterium tuberculosis	NA	NA	NA
GCF_000165715.2	Rubinisphaera brasiliensis	NA	NA	NA
GCF_000165735.1	Anaeroglobus micronuciformis	NA	NA	NA
GCF_000165775.1	Lactobacillus helveticus	NA	NA	NA
GCF_000165795.1	Aminomonas paucivorans	NA	NA	NA
GCF_000165815.1	Erwinia pyrifoliae	NA	NA	NA
GCF_000165835.1	Achromobacter xylosoxidans_B	NA	NA	NA
GCF_000165885.1	Lactobacillus crispatus	NA	NA	NA
GCF_000165905.1	Bifidobacterium bifidum	NA	NA	NA
GCF_000165925.1	Bacillus atrophaeus	NA	NA	NA
GCF_000166035.1	Faecalibacterium prausnitzii_D	NA	NA	NA
GCF_000166055.1	Rhodomicrobium vannielii	NA	NA	NA
GCF_000166075.1	Parageobacillus thermoglucosidasius	NA	NA	NA
GCF_000166115.1	Desulfovibrio_A vulgaris	NA	NA	NA
GCF_000166135.1	Frankia inefficax	NA	NA	NA
GCF_000166195.2	Mucilaginibacter paludis	NA	NA	NA
GCF_000166275.1	Algoriphagus machipongonensis	NA	NA	NA
GCF_000166315.1	Bifidobacterium longum	NA	NA	NA
GCF_000166335.1	Caldicellulosiruptor owensensis	NA	NA	NA
GCF_000166355.1	Caldicellulosiruptor hydrothermalis	NA	NA	NA
GCF_000166395.1	Leadbetterella byssophila	NA	NA	NA
GCF_000166415.1	Halanaerobium hydrogeniformans	NA	NA	NA
GCF_000166455.1	Vibrio cholerae	NA	NA	NA
GCF_000166475.1	Vibrio cholerae	Human samples	2010	Rest Central America
GCF_000166495.1	Vibrio cholerae	Human samples	2010	Rest Central America
GCF_000166515.1	Pseudomonas_E fluorescens_C	NA	NA	NA
GCF_000166535.2	Escherichia flexneri	NA	NA	NA
GCF_000166555.1	Escherichia flexneri	NA	NA	NA
GCF_000166575.1	Escherichia flexneri	NA	NA	NA
GCF_000166595.1	Escherichia flexneri	NA	NA	NA
GCF_000166615.1	Escherichia flexneri	NA	NA	NA
GCF_000166635.1	Borreliella burgdorferi	NA	NA	NA
GCF_000166655.1	Borreliella burgdorferi	NA	NA	NA
GCF_000166695.1	Caldicellulosiruptor lactoaceticus	NA	NA	NA
GCF_000166715.1	Leuconostoc gelidum	NA	NA	NA
GCF_000166735.1	Leuconostoc inhae	NA	NA	NA
GCF_000166775.1	Caldicellulosiruptor kronotskyensis	NA	NA	NA
GCF_000166795.1	Lactobacillus_E coryniformis	NA	NA	NA
GCF_000166815.1	Enterococcus_B faecium	NA	NA	NA
GCF_000166835.1	Xylella fastidiosa	NA	NA	NA
GCF_000166855.2	Xylella fastidiosa	NA	NA	NA
GCF_000166895.2	Bifidobacterium longum	NA	NA	NA
GCF_000166935.1	Rickettsia conorii	NA	NA	NA
GCF_000167095.1	Actinobacillus pleuropneumoniae	NA	NA	NA
GCF_000167135.1	Listeria monocytogenes	NA	NA	NA
GCF_000167155.1	Listeria monocytogenes_B	NA	NA	NA
GCF_000167195.1	Crocosphaera watsonii	NA	NA	NA
GCF_000167235.1	Bacillus_A anthracis	NA	NA	NA
GCF_000167255.1	Bacillus_A anthracis	NA	NA	NA
GCF_000167275.1	Bacillus_A anthracis	NA	NA	NA
GCF_000167295.1	Bacillus_A anthracis	NA	NA	NA
GCF_000167315.1	Bacillus_A anthracis	NA	NA	NA
GCF_000167335.1	Bacillus_A anthracis	NA	NA	NA
GCF_000167355.1	Desulfuromonas acetoxidans	NA	NA	NA
GCF_000167375.1	Streptococcus suis	NA	NA	NA
GCF_000167395.1	Campylobacter_D upsaliensis	NA	NA	NA
GCF_000167415.1	Campylobacter_D coli	NA	NA	NA
GCF_000167475.1	Wolbachia sp000008025	NA	NA	NA
GCF_000167575.1	Brevibacterium aurantiacum	NA	NA	NA
GCF_000167595.1	Mycoplasmoides genitalium	NA	NA	NA
GCF_000167615.1	Streptococcus pneumoniae	NA	NA	NA
GCF_000167635.1	Burkholderia mallei	NA	NA	NA
GCF_000167655.1	Ehrlichia chaffeensis	NA	NA	NA
GCF_000167735.1	Streptococcus agalactiae	NA	NA	NA
GCF_000167755.1	Streptococcus agalactiae	NA	NA	NA
GCF_000167815.1	Escherichia flexneri	NA	NA	NA
GCF_000167835.1	Escherichia coli	NA	NA	NA
GCF_000167855.1	Escherichia flexneri	NA	NA	NA
GCF_000167875.1	Escherichia flexneri	NA	NA	NA
GCF_000167895.3	Escherichia flexneri	NA	NA	NA
GCF_000167915.2	Escherichia flexneri	NA	NA	NA
GCF_000167935.2	Vibrio cholerae	NA	NA	NA
GCF_000167955.1	Ralstonia solanacearum	NA	NA	NA
GCF_000167975.1	Yersinia bercovieri	NA	NA	NA
GCF_000167995.1	Yersinia mollaretii	NA	NA	NA
GCF_000168015.1	Yersinia frederiksenii	NA	NA	NA
GCF_000168035.1	Yersinia intermedia	NA	NA	NA
GCF_000168055.1	Stigmatella aurantiaca_A	NA	NA	NA
GCF_000168075.1	Escherichia flexneri	NA	NA	NA
GCF_000168095.1	Escherichia flexneri	NA	NA	NA
GCF_000168115.1	Campylobacter_D jejuni	NA	NA	NA
GCF_000168135.1	Campylobacter_D jejuni	NA	NA	NA
GCF_000168175.1	Campylobacter_D jejuni	NA	NA	NA
GCF_000168195.1	Campylobacter_D jejuni	NA	NA	NA
GCF_000168255.1	Lactobacillus_H reuteri	NA	NA	NA
GCF_000168295.1	Rickettsiella grylli	NA	NA	NA
GCF_000168315.3	Xanthomonas oryzae	NA	NA	NA
GCF_000168335.1	Pseudomonas aeruginosa	NA	NA	NA
GCF_000168355.3	Streptococcus suis	NA	NA	NA
GCF_000168395.1	Listeria monocytogenes_B	NA	NA	NA
GCF_000168415.1	Listeria monocytogenes_B	NA	NA	NA
GCF_000168475.1	Listeria monocytogenes_C	NA	NA	NA
GCF_000168515.1	Listeria monocytogenes_B	NA	NA	NA
GCF_000168535.1	Listeria monocytogenes	NA	NA	NA
GCF_000168555.1	Listeria monocytogenes_B	NA	NA	NA
GCF_000168575.2	Listeria monocytogenes	NA	NA	NA
GCF_000168595.2	Listeria monocytogenes	NA	NA	NA
GCF_000168615.1	Listeria monocytogenes	NA	NA	NA
GCF_000168635.2	Listeria monocytogenes	NA	NA	NA
GCF_000168655.1	Listeria monocytogenes	NA	NA	NA
GCF_000168695.2	Listeria monocytogenes	NA	NA	NA
GCF_000168715.1	Chlorobium ferrooxidans	NA	NA	NA
GCF_000168775.2	Francisella tularensis	NA	NA	NA
GCF_000168815.1	Listeria monocytogenes_B	NA	NA	NA
GCF_000168835.1	Yersinia pestis	Wild flora and fauna	2001	USA
GCF_000168855.1	Comamonas_B testosteroni_B	NA	NA	NA
GCF_000168875.3	Coxiella burnetii	NA	NA	NA
GCF_000168895.2	Vibrio cholerae	NA	NA	NA
GCF_000168915.2	Vibrio cholerae	NA	NA	NA
GCF_000168935.2	Vibrio cholerae	NA	NA	NA
GCF_000168955.1	Oenococcus oeni	NA	NA	NA
GCF_000168975.1	Labrenzia aggregata	NA	NA	NA
GCF_000168995.1	BACL14 sp000168995	NA	NA	NA
GCF_000169015.1	Bacteroides caccae	NA	NA	NA
GCF_000169035.1	Collinsella aerofaciens	NA	NA	NA
GCF_000169055.1	Pseudoalteromonas marina	NA	NA	NA
GCF_000169075.1	Oceanicoccus sp000169075	NA	NA	NA
GCF_000169095.1	Lyngbya sp000169095	NA	NA	NA
GCF_000169115.1	Luminiphilus sp000169115	NA	NA	NA
GCF_000169135.1	Nodularia spumigena	NA	NA	NA
GCF_000169155.1	Thermosinus carboxydivorans	NA	NA	NA
GCF_000169175.1	Microscilla marina	NA	NA	NA
GCF_000169195.2	Bacillus_E coagulans_A	NA	NA	NA
GCF_000169215.2	Shewanella putrefaciens	NA	NA	NA
GCF_000169235.1	Dorea formicigenerans	NA	NA	NA
GCF_000169255.2	Pseudoflavonifractor capillosus	NA	NA	NA
GCF_000169315.1	Lysinibacillus fusiformis	NA	NA	NA
GCF_000169335.1	Crocosphaera sp000169335	NA	NA	NA
GCF_000169355.1	Flavobacterium sp000169355	NA	NA	NA
GCF_000169375.1	Marinobacter sp000169375	NA	NA	NA
GCF_000169395.1	HTCC2150 sp000169395	NA	NA	NA
GCF_000169415.1	Sagittula stellata	NA	NA	NA
GCF_000169435.1	Yoonia sp000169435	NA	NA	NA
GCF_000169455.1	Pseudophaeobacter sp000169455	NA	NA	NA
GCF_000169475.1	Faecalicatena gnavus	NA	NA	NA
GCF_000169495.2	Coxiella burnetii	NA	NA	NA
GCF_000169535.1	Ureaplasma urealyticum	NA	NA	NA
GCF_000169555.1	Ureaplasma urealyticum	NA	NA	NA
GCF_000169575.2	Ureaplasma urealyticum	NA	NA	NA
GCF_000169595.1	Ureaplasma urealyticum	NA	NA	NA
GCF_000169615.1	Yersinia pestis	NA	NA	NA
GCF_000169635.1	Yersinia pestis	NA	NA	NA
GCF_000169655.1	Yersinia pestis	NA	NA	NA
GCF_000169675.1	Yersinia pestis	NA	NA	NA
GCF_000169695.1	Yersinia pestis	NA	NA	NA
[truncated: 158,989 more rows]
