# Supplementary material for: Ecology, more than antibiotics consumption, is the major predictor for the global distribution of aminoglycoside-modifying enzymes
Source: eLife. 2023 Feb 14;12:e77015. doi: 10.7554/eLife.77015 (PMC9928423; doi:10.7554/eLife.77015)
Supplement: Source data 2. [file elife-77015-data2.csv]

genome_id	contig_id	frame	alignment_start	alignment_end	hmmer_Evalue	accuracy	Protein_length	CHG	Plasmid	Prophage	ICE	Integron	Transposon	spectrum_Zarate_2018	spectrum_Feldgarden_2019
GCF_000011145	NC_002570.2	2	112820	113098	2.0999999999999999e-75	0.95	279	ANTa	no	no	no	no	no	streptomycin	streptomycin
GCF_000195855	NC_002677.1	3	1013068	1013245	5.8000000000000005e-86	0.99	178	AACc	no	no	no	no	no	dibekacin, neomycin, sisomicin, tobramycin, netilmicin
GCF_000006905	NC_002696.2	2	1270050	1270193	5.2e-51	0.97	144	AACf1	no	no	no	no	no
GCF_000008485	NC_002942.5	2	799535	799810	6.4e-69	0.95	276	ANTa	no	no	no	no	no	streptomycin	streptomycin
GCF_000011505	NC_002952.2	-3	953691	953943	1.1e-182	1.0	253	ANTb	no	no	no	no	yes	kanamycin, tobramycin, isepamicin, amikacin, neomycin, dibekacin
GCF_000011925	NC_002976.3	-3	333677	333854	9.4e-109	0.99	178	AACg	no	yes	no	no	yes	kanamycin, isepamicin, netilmicin, amikacin, sisomicin, tobramycin, dibekacin	amikacin
GCF_000006965	NC_003047.1	1	826885	826963	2.3e-38	0.98	79	AACi	no	no	no	no	no	netilmicin, amikacin, dibekacin, tobramycin, sisomicin	gentamicin
GCF_000006945	NC_003197.2	1	569118	569261	1.1e-67	0.99	144	AACf1	no	no	no	no	no
GCF_000195995	NC_003198.1	-3	1136901	1137044	8.7e-67	0.99	144	AACf1	no	no	no	no	no
GCF_000009705	NC_003276.1	1	18145	18316	6e-50	0.96	172	ANTd	yes	no	no	no	no	tobramycin, kanamycin, gentamicin, dibekacin, sisomicin	gentamicin, kanamycin
GCF_000012265	NC_004129.6	3	2186230	2186373	4.3e-57	0.96	144	AACf1	no	no	no	no	no
GCF_000007545	NC_004631.1	1	527616	527759	3.1e-67	0.99	144	AACf1	no	no	no	no	no
GCF_000007785	NC_004669.1	1	16382	16559	3.7e-110	0.99	178	AACg	yes	no	no	no	yes	netilmicin, amikacin, sisomicin, kanamycin, tobramycin, dibekacin, isepamicin	amikacin
GCF_000008505	NC_005957.1	-1	821217	821390	3e-52	0.98	174	AACg	no	no	no	no	no	isepamicin, tobramycin, kanamycin, amikacin, netilmicin, sisomicin, dibekacin
GCF_000046845	NC_005966.1	1	555452	555631	4.6000000000000004e-80	1.0	180	AACj	no	no	no	no	no	neomycin, netilmicin, sisomicin, dibekacin, tobramycin
GCF_000011705	NC_006349.2	3	658206	658350	7.5e-46	0.95	145	AACf1	no	no	no	no	no
GCF_000011545	NC_006351.1	-3	940923	941067	1.1e-45	0.95	145	AACf1	no	no	no	no	no
GCF_000048645	NC_006368.1	2	789785	790060	2.1999999999999998e-69	0.95	276	ANTa	no	no	no	no	no	streptomycin	streptomycin
GCF_000048665	NC_006369.1	3	570082	570410	2.8e-215	1.0	329	APHd1	no	no	yes	no	no	spectinomycin
GCF_000011885	NC_006511.1	-2	1087208	1087351	2.5000000000000003e-67	0.99	144	AACf1	no	no	no	no	no
GCF_000009825	NC_006582.1	3	310079	310355	3.6e-137	0.99	277	ANTa	no	no	no	no	no	streptomycin	streptomycin
GCF_000009825	NC_006582.1	3	1260531	1260803	8e-95	0.97	273	ANTa	no	no	no	no	no	streptomycin	streptomycin
GCF_000011925	NC_006663.1	-3	5763	6039	7.5e-178	1.0	277	ANTa	yes	no	no	no	yes	streptomycin	streptomycin
GCF_000008105	NC_006905.1	3	573505	573648	2.2e-66	0.99	144	AACf1	no	no	no	no	no
GCF_000009865	NC_007168.1	-2	342813	342990	1.9e-108	0.99	178	AACg	no	no	no	no	yes	amikacin, kanamycin, sisomicin, tobramycin, netilmicin, dibekacin, isepamicin	amikacin
GCF_000012985	NC_007645.1	1	1067031	1067172	1.4e-40	0.98	142	AACf1	no	no	no	no	no	tobramycin, netilmicin, gentamicin, kanamycin, dibekacin, sisomicin
GCF_000092045	NC_007761.1	3	378890	379151	5.5000000000000004e-101	0.97	262	AACb	no	no	no	no	no
GCF_000092045	NC_007761.1	1	1040325	1040580	2.6e-76	0.97	256	APHf	no	no	no	no	no
GCF_000010045	NC_007907.1	2	519364	519642	4.1e-74	0.95	279	ANTa	no	no	no	no	no	streptomycin	streptomycin
GCF_000013665	NC_007912.1	1	777876	778025	4.6e-66	0.98	150	AACa	no	no	no	yes	no	sisomicin, gentamicin, fortimicin	gentamicin
GCF_000026105	NC_008027.1	-2	533986	534129	8.399999999999999e-55	0.97	144	AACf1	no	no	no	no	no
GCF_000009265	NC_008380.1	1	417515	417776	1.4e-104	0.98	262	AACb	no	no	no	no	no
GCF_000009265	NC_008380.1	3	1202883	1203138	3.7e-76	0.96	256	APHf	no	no	no	no	no
GCF_000014805	NC_008570.1	1	1024441	1024583	1.5e-58	0.98	143	AACf1	no	no	no	no	no	tobramycin, dibekacin, amikacin, isepamicin, netilmicin, kanamycin, sisomicin
GCF_000015005	NC_008596.1	-3	2159134	2159332	4.1e-88	0.98	199	AACc	no	no	no	no	no	dibekacin, netilmicin, tobramycin, sisomicin, neomycin
GCF_000203895	NC_008687.1	2	110358	110627	1.4999999999999998e-147	0.99	270	AACh	no	no	yes	no	no	tobramycin, dibekacin, netilmicin, sisomicin, gentamicin	gentamicin
GCF_000015305	NC_008726.1	-3	2051531	2051713	8.400000000000001e-73	0.98	183	AACc	no	no	no	no	no	tobramycin, netilmicin, neomycin, sisomicin, dibekacin
GCF_000015465	NC_008784.1	3	272180	272324	5.5e-46	0.95	145	AACf1	no	no	no	no	no
GCF_000015605	NC_008835.1	2	381949	382093	3.6e-46	0.95	145	AACf1	no	no	no	no	no
GCF_000015625	NC_009079.1	3	667868	668012	3.7e-46	0.95	145	AACf1	no	no	no	no	no
GCF_000016045	NC_009140.1	3	42362	42642	1.3000000000000002e-124	0.99	281	AACb	yes	no	no	yes	no
GCF_000016365	NC_009338.1	3	126617	126799	3.9e-76	0.98	183	AACc	no	no	no	no	no	netilmicin, dibekacin, sisomicin, tobramycin, neomycin
GCF_000016805	NC_009477.1	1	7759	7936	8.200000000000001e-111	0.99	178	AACg	yes	no	no	no	yes	dibekacin, sisomicin, isepamicin, amikacin, netilmicin, kanamycin, tobramycin	amikacin
GCF_000092545	NC_009494.2	1	827293	827568	3e-69	0.95	276	ANTa	no	no	no	no	no	streptomycin	streptomycin
GCF_000017125	NC_009619.1	3	2822	2999	9.4e-111	0.99	178	AACg	yes	no	no	no	yes	sisomicin, isepamicin, dibekacin, kanamycin, netilmicin, amikacin, tobramycin	amikacin
GCF_000016985	NC_009633.1	1	773487	773629	2.8e-40	0.97	143	AACf1	no	no	no	no	no	tobramycin, netilmicin, isepamicin, dibekacin, amikacin, kanamycin, sisomicin
GCF_000017145	NC_009636.1	3	764697	764775	6.9e-37	0.98	79	AACi	no	no	no	no	no	sisomicin, amikacin, dibekacin, netilmicin, tobramycin	gentamicin
GCF_000016305	NC_009650.1	1	6283	6477	8.9e-132	0.99	195	AACe1	yes	no	no	yes	yes	isepamicin, kanamycin, netilmicin, amikacin, dibekacin, tobramycin, sisomicin	amikacin
GCF_000016305	NC_009651.1	-1	16795	16971	1.3e-125	0.99	177	ANTd	yes	no	no	yes	yes	sisomicin, dibekacin, tobramycin, gentamicin, kanamycin	kanamycin, gentamicin
GCF_000017205	NC_009656.1	-1	908981	909173	3.8999999999999995e-129	0.99	193	AACe1	no	no	no	no	no	netilmicin, isepamicin, tobramycin, kanamycin, dibekacin, sisomicin, amikacin	amikacin
GCF_000010445	NC_009782.1	-1	946197	946449	1.1e-182	1.0	253	ANTb	no	no	yes	no	yes	amikacin, neomycin, tobramycin, kanamycin, isepamicin, dibekacin
GCF_000014845	NC_009838.1	3	32534	32814	1.8e-124	0.99	281	AACb	yes	no	no	yes	yes		gentamicin
GCF_000018105	NC_009925.1	2	1460279	1460440	3.4999999999999998e-46	0.96	162	AACd	no	no	no	no	no
GCF_000018105	NC_009926.1	-2	98219	98483	2.3999999999999998e-91	0.97	265	AACb	yes	no	no	no	no
GCF_000018105	NC_009927.1	-2	4126	4390	9.8e-92	0.97	265	AACb	yes	no	no	no	no
GCF_000069185	NC_010397.1	2	1492936	1493110	1.2999999999999998e-69	0.97	175	AACc	no	no	no	no	no	neomycin, tobramycin, dibekacin, netilmicin, sisomicin
GCF_000069245	NC_010410.1	-2	103965	104140	5.9e-100	0.99	176	AACa	no	no	no	yes	no	fortimicin, gentamicin, sisomicin
GCF_000069245	NC_010410.1	-3	91900	92076	5.200000000000001e-124	0.99	177	ANTd	no	no	no	yes	no	kanamycin, dibekacin, gentamicin, tobramycin, sisomicin
GCF_000069245	NC_010410.1	-3	69474	69653	4.4e-128	1.0	180	AACj	no	no	no	no	no	netilmicin, neomycin, sisomicin, dibekacin, tobramycin
GCF_000069245	NC_010410.1	-1	89440	89612	5.9e-45	0.95	173	AACg	no	no	no	no	no	sisomicin, kanamycin, amikacin, dibekacin, netilmicin, isepamicin, tobramycin
GCF_000069785	NC_010530.1	2	614579	614845	2.3e-143	0.99	267	AACh	no	no	no	no	no	gentamicin, tobramycin, netilmicin, sisomicin, dibekacin	gentamicin
GCF_000018445	NC_010611.1	3	74038	74217	1e-118	1.0	180	AACj	no	no	no	no	no	tobramycin, dibekacin, sisomicin, neomycin, netilmicin
GCF_000018445	NC_010611.1	3	83607	83802	7.2e-131	0.99	196	AACe1	no	no	no	yes	no	dibekacin, sisomicin, isepamicin, kanamycin, amikacin, tobramycin, netilmicin
GCF_000072485	NC_010943.1	1	715292	715614	7.9e-46	0.95	323	APHd2	no	no	no	no	no	spectinomycin
GCF_000020265	NC_010994.1	3	394565	394827	6.800000000000001e-106	0.98	263	AACb	no	no	no	no	no
GCF_000020265	NC_010994.1	1	1052437	1052687	3.8000000000000004e-74	0.95	251	APHf	no	no	no	no	no
GCF_000016045	NC_011080.1	2	567904	568047	8.399999999999999e-68	0.99	144	AACf1	no	no	no	no	no
GCF_000020705	NC_011083.1	2	585148	585291	7.2e-67	0.99	144	AACf1	no	no	no	no	no
GCF_000020745	NC_011094.1	1	559360	559503	4.4e-68	0.99	144	AACf1	no	no	no	no	no
GCF_000020885	NC_011149.1	-1	1098049	1098192	3.3999999999999998e-68	0.99	144	AACf1	no	no	no	no	no
GCF_000020925	NC_011205.1	-2	1060576	1060719	2.1e-67	0.99	144	AACf1	no	no	no	no	no
GCF_000009525	NC_011274.1	-2	1027145	1027288	1.6e-67	0.99	144	AACf1	no	no	no	no	no
GCF_000009505	NC_011294.1	-1	1053131	1053274	1.6e-67	0.99	144	AACf1	no	no	no	no	no
GCF_000021345	NC_011369.1	3	924590	924845	1.1e-76	0.97	256	APHf	no	no	no	no	no	streptomycin
GCF_000021245	NC_011586.2	1	104207	104382	4.3e-100	0.99	176	AACa	no	no	no	yes	no	gentamicin, fortimicin, sisomicin
GCF_000021245	NC_011586.2	3	77288	77467	1.2e-121	1.0	180	AACj	no	no	no	no	no	tobramycin, neomycin, sisomicin, netilmicin, dibekacin
GCF_000021925	NC_011830.1	1	881346	881624	4.1e-74	0.95	279	ANTa	no	no	no	no	no	streptomycin	streptomycin
GCF_000026685	NC_011896.1	2	1013024	1013201	5.8000000000000005e-86	0.99	178	AACc	no	no	no	no	no	neomycin, netilmicin, dibekacin, sisomicin, tobramycin
GCF_000022005	NC_011916.1	1	1278711	1278854	4.9e-51	0.97	144	AACf1	no	no	no	no	no
GCF_000013065	NC_011973.1	1	9598	9874	1.4000000000000001e-123	0.99	277	ANTa	yes	no	no	no	yes	streptomycin	streptomycin
GCF_000010585	NC_011996.1	3	14724	14901	1e-109	0.99	178	AACg	yes	no	yes	no	yes	amikacin, tobramycin, isepamicin, netilmicin, sisomicin, kanamycin, dibekacin	amikacin
GCF_000018385	NC_012125.1	-2	887320	887463	7.2e-67	0.99	144	AACf1	no	no	no	no	no
GCF_000010165	NC_012491.1	2	800864	801141	2.4e-142	0.99	278	ANTa	no	no	no	no	no	streptomycin	streptomycin
GCF_000021445	NC_012581.1	3	501352	501525	4.9e-52	0.98	174	AACg	no	no	no	no	no	kanamycin, amikacin, isepamicin, netilmicin, tobramycin, dibekacin, sisomicin
GCF_000020605	NC_012781.1	2	195727	195867	7.6e-46	0.96	141	AACf1	no	no	no	no	no	amikacin, sisomicin, netilmicin, dibekacin, tobramycin, isepamicin, kanamycin
GCF_000023185	NC_012850.1	2	994810	995065	1.4e-70	0.95	256	APHf	no	no	no	no	no	streptomycin
GCF_000026725	NC_012924.1	3	309395	309671	6.2000000000000004e-170	1.0	277	ANTa	no	no	yes	no	no	streptomycin	streptomycin
GCF_000024685	NC_013406.1	1	62716	62886	1.4e-43	0.95	171	AACg	no	no	no	no	no	kanamycin, tobramycin, dibekacin, sisomicin, netilmicin, isepamicin, amikacin
GCF_000091785	NC_013861.1	1	385892	386222	7.2e-72	0.96	331	APHd1	no	no	no	no	no	spectinomycin
GCF_000092285	NC_014100.1	2	1478948	1479093	3.4e-52	0.97	146	AACf1	no	no	no	no	no
GCF_000092625	NC_014125.1	1	822629	822904	3e-69	0.95	276	ANTa	no	no	no	no	no	streptomycin	streptomycin
GCF_000092125	NC_014212.1	1	814824	814962	1.9e-43	0.96	139	AACf1	no	no	no	no	no	netilmicin, tobramycin, dibekacin, sisomicin, kanamycin, gentamicin
GCF_000252955	NC_014228.1	2	1029843	1030107	2.6e-72	0.96	265	AACb	no	no	no	no	no		gentamicin
GCF_000196735	NC_014551.1	3	236071	236346	6.7e-133	0.99	276	ANTa	no	no	no	no	no	streptomycin	streptomycin
GCF_000164985	NC_014622.2	1	433647	433924	1.7e-140	0.99	278	ANTa	no	no	no	no	no	streptomycin
GCF_000164885	NC_014625.1	1	428033	428290	1.1999999999999999e-91	0.96	258	AACb	no	no	no	no	no		gentamicin
GCF_000165835	NC_014640.1	2	895523	895665	2.9e-53	0.96	143	AACf1	no	no	no	no	no	netilmicin, kanamycin, isepamicin, amikacin, sisomicin, tobramycin, dibekacin
GCF_000166075	NC_014650.1	2	624027	624294	2.2e-70	0.96	268	ANTa	no	no	no	no	no	streptomycin	streptomycin
GCF_000184435	NC_014814.1	-1	1717146	1717328	2.8e-76	0.98	183	AACc	no	no	no	no	no	netilmicin, tobramycin, sisomicin, dibekacin, neomycin
GCF_000185965	NC_014924.1	1	290394	290535	8.3000000000000005e-50	0.97	142	AACf1	no	no	no	no	no
GCF_000185885	NC_014925.1	-3	360572	360749	4.7e-109	0.99	178	AACg	no	no	no	no	no	netilmicin, tobramycin, sisomicin, amikacin, isepamicin, kanamycin, dibekacin	amikacin
GCF_000199675	NC_014960.1	1	899817	900059	6.3e-49	0.96	243	ANTb	no	no	no	no	no	neomycin, isepamicin, amikacin, kanamycin, tobramycin, dibekacin
GCF_000212415	NC_015500.1	1	406276	406537	6.2e-72	0.96	262	ANTa	no	no	no	no	no	streptomycin	streptomycin
GCF_000214155	NC_015576.1	-3	1460512	1460693	1.1e-70	0.96	182	AACc	no	no	no	no	no	tobramycin, dibekacin, netilmicin, neomycin, sisomicin
GCF_000214355	NC_015577.1	2	118104	118380	3e-110	0.99	277	ANTa	no	no	no	no	no	streptomycin	streptomycin
GCF_000147795	NC_015590.1	2	764401	764479	4.3e-38	0.98	79	AACi	no	no	no	no	no	amikacin, dibekacin, tobramycin, netilmicin, sisomicin	gentamicin
GCF_000218915	NC_015690.1	2	855499	855671	1.3e-45	0.96	173	AACg	no	no	no	no	no	netilmicin, amikacin, sisomicin, kanamycin, tobramycin, isepamicin, dibekacin
GCF_000218915	NC_015690.1	2	1321515	1321779	7.6e-61	0.97	265	ANTa	no	no	no	no	no	streptomycin
GCF_000253035	NC_015702.1	3	571111	571439	3.4e-112	0.98	329	APHd1	no	no	no	no	no	spectinomycin
GCF_000237205	NC_015713.1	3	560592	560920	9.4e-118	0.97	329	APHd1	no	no	no	no	no	spectinomycin
GCF_000270285	NC_015738.1	3	933022	933295	5.8e-143	1.0	274	ANTa	no	no	no	no	no	streptomycin	streptomycin
GCF_000252995	NC_015761.1	1	530170	530312	3.7e-63	0.98	143	AACf1	no	no	no	no	no
GCF_000269985	NC_016109.1	1	2568346	2568522	8e-57	0.97	177	AACc	no	no	no	no	no	sisomicin, neomycin, netilmicin, dibekacin, tobramycin
GCF_000176115	NC_016110.1	3	33969	34266	1e-150	0.99	298	APHb	yes	no	no	no	no
GCF_000176115	NC_016114.1	1	1549425	1549702	3.9e-118	0.98	278	AACb	no	no	no	no	no
GCF_000092385	NC_016582.1	1	3594064	3594240	9.4e-65	0.98	177	AACc	no	no	no	no	no	dibekacin, neomycin, netilmicin, sisomicin, tobramycin
GCF_000230895	NC_016604.1	2	496150	496331	8e-85	0.99	182	AACc	no	no	no	no	no	tobramycin, netilmicin, dibekacin, sisomicin, neomycin
GCF_000283695	NC_016784.1	2	243265	243540	8.1e-132	0.99	276	ANTa	no	no	no	no	no	streptomycin	streptomycin
GCF_000234745	NC_016808.1	3	112066	112242	6.2e-125	0.99	177	ANTd	no	no	no	yes	no	dibekacin, kanamycin, tobramycin, gentamicin, sisomicin	kanamycin, gentamicin
GCF_000210855	NC_016810.1	3	554737	554880	2.2e-67	0.99	144	AACf1	no	no	no	no	no
GCF_000239175	NC_016811.1	2	786826	787101	6.5e-69	0.95	276	ANTa	no	no	no	no	no	streptomycin	streptomycin
GCF_000245535	NC_016832.1	2	526599	526742	6.2e-67	0.99	144	AACf1	no	no	no	no	no
GCF_000240185	NC_016839.1	1	14717	14949	7.1e-151	0.99	233	AACh	yes	no	no	no	no	gentamicin, tobramycin, netilmicin, sisomicin, dibekacin	gentamicin
GCF_000027025	NC_016854.1	1	566625	566768	5.3999999999999995e-68	0.99	144	AACf1	no	no	no	no	no
GCF_000022165	NC_016856.1	3	572445	572588	8.599999999999999e-68	0.99	144	AACf1	no	no	no	no	no
GCF_000188735	NC_016857.1	3	554737	554880	2.2e-67	0.99	144	AACf1	no	no	no	no	no
GCF_000283735	NC_016860.1	2	568350	568493	1.6e-67	0.99	144	AACf1	no	no	no	no	no
GCF_000283735	NC_016861.1	-1	21630	21915	8.39999999999999e-185	1.0	286	AACh	yes	no	yes	no	yes
GCF_000213635	NC_016863.1	2	555176	555319	8.299999999999999e-68	0.99	144	AACf1	no	no	no	no	no
GCF_000245495	NC_016912.1	2	409783	409835	1.7e-41	0.99	53	ANTe	no	no	no	no	no	kanamycin, isepamicin, tobramycin, amikacin, neomycin, dibekacin
GCF_000304555	NC_016934.1	-2	1367712	1367892	3.3e-105	0.99	181	AACc	no	no	no	no	no	tobramycin, dibekacin, neomycin, netilmicin, sisomicin
GCF_000250655	NC_016935.1	1	1038675	1038847	2.9999999999999997e-47	0.96	173	AACg	no	no	no	no	no	kanamycin, netilmicin, dibekacin, sisomicin, tobramycin, isepamicin, amikacin
GCF_000252875	NC_017046.1	3	554698	554841	1.1e-67	0.99	144	AACf1	no	no	no	no	no
GCF_000284395	NC_017061.1	2	231549	231824	1.5e-132	0.99	276	ANTa	no	no	no	no	no	streptomycin	streptomycin
GCF_000284255	NC_017075.1	2	221154	221298	2.1999999999999997e-53	0.96	145	AACf1	no	no	no	no	no
GCF_000188215	NC_017162.1	3	561650	561825	6.2e-100	0.99	176	AACa	no	no	no	yes	yes	gentamicin, sisomicin, fortimicin
GCF_000188215	NC_017162.1	1	75399	75578	4.4000000000000004e-125	1.0	180	AACj	no	no	no	no	no	dibekacin, sisomicin, tobramycin, netilmicin, neomycin
GCF_000188215	NC_017162.1	2	415784	415944	3.7e-86	0.99	161	AACd	no	no	no	no	yes	isepamicin, sisomicin, kanamycin, amikacin, dibekacin, tobramycin, netilmicin
GCF_000226275	NC_017171.2	2	486019	486198	1.4000000000000001e-123	1.0	180	AACj	no	no	no	no	no	netilmicin, sisomicin, dibekacin, neomycin, tobramycin
GCF_000195515	NC_017188.1	2	217179	217454	6.4e-133	0.99	276	ANTa	no	no	no	no	no	streptomycin	streptomycin
GCF_000204275	NC_017190.1	1	231242	231517	1.4e-132	0.99	276	ANTa	no	no	no	no	no	streptomycin	streptomycin
GCF_000221645	NC_017191.1	3	219186	219461	6.4e-133	0.99	276	ANTa	no	no	no	no	no	streptomycin	streptomycin
GCF_000223215	NC_017243.1	3	439932	440088	9.5e-52	0.95	157	AACd	no	no	no	no	no	kanamycin, netilmicin, sisomicin, amikacin, dibekacin, isepamicin, tobramycin
GCF_000027045	NC_017331.1	-2	277415	277592	1.3000000000000001e-108	0.99	178	AACg	no	yes	no	no	yes	tobramycin, netilmicin, sisomicin, isepamicin, dibekacin, kanamycin, amikacin	amikacin
GCF_000009585	NC_017335.1	2	62	338	2.8e-115	0.99	277	ANTa	yes	no	no	no	no	streptomycin
GCF_000145595	NC_017341.1	1	703916	704093	4.6e-109	0.99	178	AACg	no	no	no	no	yes	dibekacin, sisomicin, tobramycin, kanamycin, amikacin, netilmicin, isepamicin	amikacin
GCF_000223375	NC_017384.1	3	292803	293060	1.1999999999999999e-91	0.96	258	AACb	no	no	no	no	no		gentamicin
GCF_000237325	NC_017542.1	2	433208	433485	1.8e-140	0.99	278	ANTa	no	no	no	no	no	streptomycin
GCF_000284555	NC_017549.1	3	632035	632196	2.3e-84	0.99	162	AACd	no	no	no	yes	yes	tobramycin, isepamicin, kanamycin, amikacin, netilmicin, sisomicin, dibekacin
GCF_000231905	NC_017621.1	2	184676	184815	6.4e-37	0.96	140	AACf1	no	no	no	no	no
GCF_000258365	NC_017623.1	2	814986	815129	4.7e-67	0.99	144	AACf1	no	no	no	no	no
GCF_000258535	NC_017672.3	3	1050841	1051013	4.3e-47	0.96	173	AACg	no	no	no	no	no	dibekacin, tobramycin, amikacin, sisomicin, netilmicin, isepamicin, kanamycin
GCF_000258535	NC_017672.3	2	760292	760556	5.8e-62	0.97	265	ANTa	no	no	no	no	no	streptomycin
GCF_000259175	NC_017731.1	3	1235608	1235785	2.7000000000000002e-89	0.99	178	AACc	no	no	no	no	no	tobramycin, dibekacin, netilmicin, sisomicin, neomycin
GCF_000245355	NC_017765.1	2	2510480	2510655	7.699999999999999e-53	0.98	176	AACc	no	no	no	no	no	netilmicin, neomycin, tobramycin, sisomicin, dibekacin
GCF_000237145	NC_017803.1	1	2184082	2184256	2.2e-50	0.96	175	AACc	no	no	no	no	no	netilmicin, tobramycin, neomycin, sisomicin, dibekacin
GCF_000260515	NC_017832.1	-1	929633	929777	6.300000000000001e-44	0.95	145	AACf1	no	no	no	no	no
GCF_000187205	NC_017847.1	2	888391	888566	6.300000000000001e-100	0.99	176	AACa	no	no	no	yes	yes	fortimicin, sisomicin, gentamicin	gentamicin
GCF_000187205	NC_017847.1	2	459330	459522	1.5e-129	0.99	193	AACe1	no	no	no	yes	yes	sisomicin, amikacin, isepamicin, dibekacin, netilmicin, kanamycin, tobramycin	amikacin
GCF_000262385	NC_017912.1	2	230954	231229	1.5e-132	0.99	276	ANTa	no	no	no	no	no	streptomycin	streptomycin
GCF_000266905	NC_018027.1	-2	1771389	1771568	1.9e-77	0.98	180	AACc	no	no	no	no	no	netilmicin, dibekacin, neomycin, tobramycin, sisomicin
GCF_000271325	NC_018065.1	2	754658	754800	2.4e-47	0.97	143	AACf1	no	no	no	no	no	tobramycin, netilmicin, amikacin, isepamicin, kanamycin, dibekacin, sisomicin
GCF_000271405	NC_018081.1	2	477788	477950	5.8e-61	0.98	163	AACd	no	no	no	no	no
GCF_000306865	NC_018139.1	1	767485	767760	2.7e-69	0.95	276	ANTa	no	no	no	no	no	streptomycin	streptomycin
GCF_000306845	NC_018140.1	3	821354	821629	1.3999999999999998e-68	0.95	276	ANTa	no	no	no	no	no	streptomycin	streptomycin
GCF_000277775	NC_018150.2	-2	1393874	1394048	1.3e-70	0.97	175	AACc	no	no	no	no	no	tobramycin, sisomicin, neomycin, netilmicin, dibekacin
GCF_000283295	NC_018289.1	-1	2158597	2158795	4.1e-88	0.98	199	AACc	no	no	no	no	no	neomycin, tobramycin, dibekacin, netilmicin, sisomicin
GCF_000292415	NC_018491.1	3	1313368	1313541	4.8999999999999995e-49	0.98	174	AACg	no	no	no	no	no	sisomicin, netilmicin, dibekacin, tobramycin, kanamycin, amikacin, isepamicin
GCF_000292455	NC_018500.1	1	310841	311013	4.9e-51	0.97	173	AACg	no	no	no	no	no	netilmicin, isepamicin, kanamycin, amikacin, sisomicin, dibekacin, tobramycin
GCF_000294635	NC_018529.1	-2	934880	935024	1.0000000000000001e-45	0.95	145	AACf1	no	no	no	no	no
GCF_000300005	NC_018691.1	1	434718	434866	4.4e-66	0.97	149	AACa	no	no	no	no	no	fortimicin, gentamicin, sisomicin	gentamicin
GCF_000304415	NC_018700.1	1	722579	722657	3.2000000000000003e-38	0.98	79	AACi	no	no	no	no	no	sisomicin, amikacin, tobramycin, netilmicin, dibekacin	gentamicin
GCF_000253235	NC_018750.1	2	2169721	2169783	3.6e-45	0.99	63	APHe	no	no	no	no	no
GCF_000253235	NC_018750.1	3	1873285	1873460	1.6e-46	0.95	176	AACc	no	no	no	no	no
GCF_000316685	NC_019680.1	-3	915618	915767	1.3e-63	0.97	150	AACa	no	no	no	no	no	sisomicin, gentamicin, fortimicin	gentamicin
GCF_000317105	NC_019693.1	2	2324698	2324857	8.9e-50	0.95	160	AACd	no	no	no	no	no
GCF_000317145	NC_019697.1	2	827531	827674	1.1e-44	0.98	144	AACf1	no	no	no	no	no
GCF_000317475	NC_019729.1	-1	980181	980339	7.6e-52	0.96	159	AACd	no	no	no	no	no
GCF_000317495	NC_019753.1	-3	1635941	1636083	3.7e-45	0.98	143	AACf1	no	no	no	no	no
GCF_000320385	NC_019845.2	2	818633	818711	4e-38	0.98	79	AACi	no	no	no	no	no	netilmicin, sisomicin, amikacin, tobramycin, dibekacin	gentamicin
GCF_000321395	NC_019896.1	1	496808	497086	3.3e-154	0.99	279	ANTa	no	no	no	no	no	streptomycin
GCF_000227705	NC_019897.1	2	373432	373708	2.8e-78	0.98	277	ANTa	no	no	no	no	no	streptomycin	streptomycin
GCF_000325725	NC_019906.1	2	24606	24782	3.9000000000000005e-126	0.99	177	ANTd	yes	no	yes	yes	no	tobramycin, gentamicin, kanamycin, dibekacin, sisomicin	kanamycin, gentamicin
GCF_000325725	NC_019906.1	-3	15679	15871	3.3e-131	0.99	193	AACe1	yes	no	yes	yes	no	isepamicin, dibekacin, amikacin, tobramycin, kanamycin, netilmicin, sisomicin	amikacin
GCF_000328805	NC_019950.1	-2	1370639	1370819	3.3e-105	0.99	181	AACc	no	no	no	no	no	neomycin, dibekacin, sisomicin, tobramycin, netilmicin
GCF_000328785	NC_019951.1	-1	1398848	1399028	3.3e-105	0.99	181	AACc	no	no	no	no	no	sisomicin, neomycin, netilmicin, dibekacin, tobramycin
GCF_000328825	NC_019952.1	-1	1402819	1402999	7.7e-105	0.99	181	AACc	no	no	no	no	no	tobramycin, dibekacin, sisomicin, neomycin, netilmicin
GCF_000328845	NC_019965.1	-2	1367976	1368156	3.3e-105	0.99	181	AACc	no	no	no	no	no	neomycin, tobramycin, dibekacin, netilmicin, sisomicin
GCF_000317145	NC_020053.1	2	69513	69692	2.8e-107	0.97	180	AACe1	yes	no	no	yes	no
GCF_000331105	NC_020054.1	-1	310588	310731	1.2999999999999998e-43	0.96	144	AACf1	no	no	no	no	no
GCF_000330885	NC_020062.1	2	204822	205075	5.3e-76	0.95	254	APHf	yes	no	no	no	no	streptomycin
GCF_000334515	NC_020180.1	1	43477	43670	7.7e-131	0.99	194	AACe1	yes	no	no	yes	no	sisomicin, kanamycin, dibekacin, amikacin, netilmicin, tobramycin, isepamicin	amikacin
GCF_000336445	NC_020210.1	3	583923	584189	9.600000000000001e-74	0.96	267	ANTa	no	no	no	no	no	streptomycin	streptomycin
GCF_000336425	NC_020211.1	1	1539662	1539804	5.2e-59	0.99	143	AACf1	no	no	no	no	no
GCF_000338755	NC_020238.1	2	974805	974977	6e-52	0.97	173	AACg	no	no	no	no	no	kanamycin, dibekacin, tobramycin, isepamicin, netilmicin, amikacin, sisomicin
GCF_000341425	NC_020307.1	-3	1328135	1328277	1.5e-67	0.99	143	AACf1	no	no	no	no	no
GCF_000347615	NC_020521.1	2	607120	607448	1.3e-202	1.0	329	APHd1	no	no	no	no	no	spectinomycin
GCF_000346065	NC_020528.1	1	826743	826821	2.3e-38	0.98	79	AACi	no	no	no	no	no	tobramycin, sisomicin, netilmicin, amikacin, dibekacin	gentamicin
GCF_000340845	NC_020895.1	1	2408462	2408637	6.799999999999999e-53	0.98	176	AACc	no	no	no	no	no	neomycin, sisomicin, netilmicin, dibekacin, tobramycin
GCF_000363915	NC_020994.1	-3	12559	12750	1.2e-129	0.99	192	AACe1	yes	no	yes	yes	no	netilmicin, isepamicin, tobramycin, dibekacin, sisomicin, kanamycin, amikacin
GCF_000376665	NC_021081.1	-3	1009267	1009407	5.9e-46	0.98	141	AACf1	no	no	no	no	no
GCF_000380325	NC_021151.1	2	307545	307688	2.1e-67	0.99	144	AACf1	no	no	no	no	no
GCF_000385905	NC_021176.1	1	527616	527759	3.1e-67	0.99	144	AACf1	no	no	no	no	no
GCF_000397205	NC_021237.1	2	2117511	2117654	5.2e-56	0.96	144	AACf1	no	no	no	no	no
GCF_000400635	NC_021252.1	1	2897260	2897431	4.2999999999999997e-61	0.98	172	AACc	no	no	no	no	no	netilmicin, neomycin, dibekacin, sisomicin, tobramycin
GCF_000445035	NC_021282.1	1	1482724	1482898	4.1999999999999996e-70	0.97	175	AACc	no	no	no	no	no	sisomicin, tobramycin, neomycin, dibekacin, netilmicin
GCF_000401555	NC_021290.1	3	1094332	1094474	2.6e-58	0.98	143	AACf1	no	no	no	no	no	amikacin, sisomicin, isepamicin, netilmicin, tobramycin, kanamycin, dibekacin
GCF_000404245	NC_021350.1	-1	599681	600009	8.7e-203	0.99	329	APHd1	no	no	no	no	no	spectinomycin
GCF_000404245	NC_021350.1	2	816993	817268	5.3e-69	0.95	276	ANTa	no	no	no	no	no	streptomycin
GCF_000408885	NC_021362.1	1	73070	73333	9.7e-102	0.96	264	ANTa	no	no	no	no	no	streptomycin	streptomycin
GCF_000412775	NC_021554.1	-3	936313	936565	7.9e-182	1.0	253	ANTb	no	no	yes	no	yes	tobramycin, amikacin, kanamycin, isepamicin, dibekacin, neomycin
GCF_000418345	NC_021670.1	-2	237809	237986	1.4e-107	0.99	178	AACg	no	no	no	no	yes	kanamycin, amikacin, sisomicin, dibekacin, tobramycin, isepamicin, netilmicin	amikacin
GCF_000419385	NC_021726.1	3	77587	77766	3.9000000000000004e-123	1.0	180	AACj	no	no	no	no	no	tobramycin, netilmicin, neomycin, sisomicin, dibekacin
GCF_000419385	NC_021728.1	1	568	760	6.6e-132	0.99	193	AACe1	yes	no	no	yes	yes	netilmicin, sisomicin, isepamicin, amikacin, dibekacin, tobramycin, kanamycin
GCF_000419425	NC_021729.1	3	76569	76748	5.4e-123	1.0	180	AACj	no	no	no	no	no	tobramycin, sisomicin, neomycin, netilmicin, dibekacin
GCF_000419425	NC_021732.1	2	944	1136	8.7e-132	0.99	193	AACe1	yes	no	no	yes	yes	isepamicin, amikacin, sisomicin, kanamycin, dibekacin, tobramycin, netilmicin
GCF_000419405	NC_021733.1	2	81117	81296	5.600000000000001e-124	1.0	180	AACj	no	no	no	no	no	sisomicin, neomycin, dibekacin, netilmicin, tobramycin
GCF_000430105	NC_021810.1	3	1167970	1168113	9.7e-67	0.99	144	AACf1	no	no	no	no	no
GCF_000430105	NC_021811.1	3	22943	23228	1.2e-184	1.0	286	AACh	yes	no	yes	no	yes
GCF_000430085	NC_021812.2	1	729722	729865	7.2e-67	0.99	144	AACf1	no	no	no	no	no
GCF_000430085	NC_021813.2	2	27839	28119	1.8e-124	0.99	281	AACb	yes	no	yes	yes	no
GCF_000430145	NC_021814.1	-1	1002783	1002926	2.1e-67	0.99	144	AACf1	no	no	no	no	no
GCF_000430165	NC_021820.1	3	984658	984801	4.099999999999999e-68	0.99	144	AACf1	no	no	no	no	no
GCF_000439415	NC_021844.1	-3	803028	803171	3.9000000000000005e-67	0.99	144	AACf1	no	no	no	no	no
GCF_000439255	NC_021870.1	2	551769	551911	7.2e-63	0.98	143	AACf1	no	no	no	no	no
GCF_000439695	NC_021877.1	-2	22293	22437	1.1e-45	0.95	145	AACf1	no	no	no	no	no
GCF_000442415	NC_021902.1	1	909515	909658	3e-68	0.99	144	AACf1	no	no	no	no	no
GCF_000442435	NC_021905.1	2	377587	377848	7.8e-102	0.97	262	AACb	no	no	no	no	no
GCF_000442435	NC_021905.1	2	1000330	1000585	2.6e-76	0.97	256	APHf	no	no	no	no	no
GCF_000444445	NC_021984.1	1	474393	474536	4e-67	0.99	144	AACf1	no	no	no	no	no
GCF_000455565	NC_022075.1	3	249596	249871	4.1e-132	0.99	276	ANTa	no	no	no	no	no	streptomycin	streptomycin
GCF_000455585	NC_022081.1	3	235944	236219	4e-132	0.99	276	ANTa	no	no	no	no	no	streptomycin	streptomycin
GCF_000462995	NC_022221.1	3	486401	486544	1.7e-67	0.99	144	AACf1	no	no	no	no	no
GCF_000626655	NC_022344.1	-1	14098	14293	3.2e-132	0.99	196	AACe1	yes	no	no	yes	no	isepamicin, amikacin, tobramycin, kanamycin, netilmicin, sisomicin, dibekacin	amikacin
GCF_000473275	NC_022525.1	2	557508	557651	5.4e-67	0.99	144	AACf1	no	no	no	no	no
GCF_000493375	NC_022530.1	3	236201	236476	3.2e-132	0.99	276	ANTa	no	no	no	no	no	streptomycin	streptomycin
GCF_000493535	NC_022544.1	1	551913	552056	1e-67	0.99	144	AACf1	no	no	no	no	no
GCF_000493675	NC_022569.1	3	562548	562691	1.1e-67	0.99	144	AACf1	no	no	no	no	no
GCF_000484545	NC_022594.1	1	2058608	2058783	6.300000000000001e-100	0.99	176	AACa	no	no	no	no	no	gentamicin, fortimicin, sisomicin	gentamicin
GCF_000493755	NC_022651.1	-1	25301	25496	5.6e-129	0.99	196	AACe1	yes	no	yes	yes	yes	tobramycin, sisomicin, netilmicin, isepamicin, kanamycin, amikacin, dibekacin	amikacin
GCF_000504125	NC_022878.1	1	217507	217668	1e-55	0.98	162	AACd	no	no	no	no	no
GCF_000503895	NC_022997.1	1	1216755	1216910	2.2e-58	0.96	156	AACa	no	no	no	no	no	sisomicin, gentamicin, fortimicin	gentamicin
GCF_000317305	NC_023036.2	-1	1579007	1579188	1.9999999999999998e-84	0.97	182	AACc	no	no	no	no	no	netilmicin, dibekacin, tobramycin, neomycin, sisomicin
GCF_000508265	NC_023073.1	2	235463	235738	7.5e-132	0.99	276	ANTa	no	no	no	no	no	streptomycin	streptomycin
GCF_000166815	NZ_AAAK03000130.1	2	366	529	7.4e-82	0.99	164	AACd	no	no	no	no	no
GCF_000167255	NZ_AAEO01000018.1	1	16457	16733	2.8e-84	0.97	277	ANTa	no	no	no	no	no	streptomycin	streptomycin
GCF_000167295	NZ_AAEQ01000035.3	1	166253	166426	2.5e-51	0.98	174	AACg	no	no	no	no	no	tobramycin, isepamicin, sisomicin, kanamycin, amikacin, dibekacin, netilmicin
GCF_000167635	NZ_AAHO01000010.1	2	23671	23815	3e-45	0.95	145	AACf1	no	no	no	no	no
GCF_000153365	NZ_AAOX01000010.1	2	5749	6026	7.3e-122	0.99	278	ANTa	no	no	yes	no	no	streptomycin
GCF_000169315	NZ_AAXV01000028.1	1	6014	6155	2.4e-50	0.97	142	AACf1	no	no	no	no	no	sisomicin, isepamicin, kanamycin, amikacin, dibekacin, netilmicin, tobramycin
GCF_000169715	NZ_AAYX01000006.1	1	26836	26980	2.3e-45	0.95	145	AACf1	no	no	no	no	no
GCF_000169875	NZ_AAZP01000047.1	-2	3332	3476	1.5e-45	0.95	145	AACf1	no	no	no	no	no
GCF_000170195	NZ_ABAK02000001.1	1	344006	344149	2.5000000000000003e-67	0.99	144	AACf1	no	no	no	no	no
GCF_000170215	NZ_ABAM02000001.1	3	722425	722568	5.699999999999999e-68	0.99	144	AACf1	no	no	no	no	no
GCF_000170235	NZ_ABAN01000003.3	-2	47621	47764	1.3e-65	0.99	144	AACf1	no	no	no	no	no
GCF_000170255	NZ_ABAO01000017.1	3	11079	11222	7.499999999999999e-68	0.99	144	AACf1	no	no	no	no	no
GCF_000170355	NZ_ABBF01000473.1	-1	3667	3810	1.7e-50	0.97	144	AACf1	no	no	no	no	no
GCF_000170375	NZ_ABBG01000315.1	-2	4379	4522	6.3e-50	0.97	144	AACf1	no	no	no	no	no
GCF_000170595	NZ_ABBR01000534.1	-2	2197	2341	3.5e-45	0.95	145	AACf1	no	no	no	no	no
GCF_000170915	NZ_ABCT01000001.1	2	68258	68427	1.5e-64	0.97	170	ANTd	no	no	no	no	no	kanamycin, dibekacin, tobramycin, gentamicin, sisomicin	kanamycin, gentamicin
GCF_000181615	NZ_ABDA02000008.1	1	10445	10617	1.7e-52	0.97	173	AACg	no	no	no	no	no	amikacin, tobramycin, sisomicin, kanamycin, netilmicin, dibekacin, isepamicin
GCF_000181675	NZ_ABDN02000001.1	2	236756	236929	1.2e-51	0.98	174	AACg	no	no	no	no	no	dibekacin, isepamicin, kanamycin, tobramycin, sisomicin, amikacin, netilmicin
GCF_000171255	NZ_ABEH02000002.1	3	121696	121838	1.1e-67	0.99	143	AACf1	no	no	no	no	no
GCF_000171275	NZ_ABEI01000002.1	2	71176	71319	2.5000000000000003e-67	0.99	144	AACf1	no	no	no	no	no
GCF_000171295	NZ_ABEJ01000003.1	2	72537	72680	6.3e-68	0.99	144	AACf1	no	no	no	no	no
GCF_000171315	NZ_ABEL01000002.1	1	98107	98250	1.4e-66	0.99	144	AACf1	no	no	no	no	no
GCF_000171415	NZ_ABEW01000001.1	-2	117641	117784	1.0000000000000001e-66	0.99	144	AACf1	no	no	no	no	no
GCF_000171435	NZ_ABFA01000089.1	-3	663	939	1.4e-176	1.0	277	ANTa	yes	no	no	no	no	streptomycin	streptomycin
GCF_000171495	NZ_ABFF01000004.1	3	66892	67035	1.8e-67	0.99	144	AACf1	no	no	no	no	no
GCF_000171515	NZ_ABFG01000001.1	-1	50284	50427	2.2e-67	0.99	144	AACf1	no	no	no	no	no
GCF_000171535	NZ_ABFH02000001.1	-2	644015	644300	4.3e-183	1.0	286	AACh	no	yes	no	no	no
GCF_000171535	NZ_ABFH02000002.1	-1	481795	481938	4.199999999999999e-68	0.99	144	AACf1	no	no	no	no	no
GCF_000171635	NZ_ABFV01000152.1	3	1048	1292	2.9999999999999997e-96	0.99	245	APHg	no	no	no	no	yes	spectinomycin
GCF_000181915	NZ_ABKF01000002.1	2	10230	10403	8e-52	0.98	174	AACg	no	no	no	no	no	netilmicin, amikacin, tobramycin, kanamycin, dibekacin, isepamicin, sisomicin
GCF_000219895	NZ_ABLB01000001.1	2	10266	10439	1e-51	0.98	174	AACg	no	no	no	no	no	isepamicin, netilmicin, tobramycin, kanamycin, amikacin, dibekacin, sisomicin
GCF_000181975	NZ_ABLC01000220.1	3	1844	2081	7.099999999999999e-62	0.95	238	APHf	no	no	no	no	no	streptomycin
GCF_000182015	NZ_ABLK01000253.1	-3	1626	1863	4.2e-62	0.95	238	APHf	no	no	no	no	no	streptomycin
GCF_000172615	NZ_ABQA01000128.1	3	2454	2617	4.900000000000001e-80	0.99	164	AACd	no	no	no	no	no
GCF_000172655	NZ_ABQI01000013.1	1	4349	4512	8.000000000000001e-81	0.99	164	AACd	no	no	no	no	no
GCF_000172655	NZ_ABQI01000026.1	3	131	400	1.0000000000000001e-112	0.99	270	ANTa	yes	no	no	no	yes
GCF_000172655	NZ_ABQI01000027.1	3	5	281	1.5e-170	1.0	277	ANTa	yes	no	no	no	yes
GCF_000172675	NZ_ABQJ01000079.1	1	26529	26692	2.7e-80	0.99	164	AACd	no	no	no	no	no
GCF_000172855	NZ_ABSA01000025.1	2	46	298	1.2e-183	1.0	253	ANTb	yes	no	no	no	yes	kanamycin, tobramycin, dibekacin, amikacin, isepamicin, neomycin
GCF_000172855	NZ_ABSA01000105.1	2	132	309	1.6e-110	0.99	178	AACg	yes	no	no	no	no	netilmicin, tobramycin, kanamycin, amikacin, dibekacin, isepamicin, sisomicin
GCF_000173075	NZ_ABVL01000046.1	-3	1118	1261	5.8e-39	0.96	144	AACf1	no	no	no	no	no
GCF_000173555	NZ_ABYK01000002.1	1	12084	12243	2.0999999999999998e-47	0.95	160	AACd	no	no	no	no	no
GCF_000156695	NZ_ABYX02000001.1	2	2574485	2574767	3.7000000000000004e-125	0.99	283	AACb	no	no	no	no	no
GCF_000173695	NZ_ACBF01000008.1	2	59316	59459	1.1e-67	0.99	144	AACf1	no	no	no	no	no
GCF_000182195	NZ_ACCE01000006.1	3	56259	56403	8.4e-46	0.95	145	AACf1	no	no	no	no	no
GCF_000174195	NZ_ACFY01000051.1	1	6805	7078	2.1999999999999998e-142	1.0	274	ANTa	no	no	no	no	no	streptomycin	streptomycin
GCF_000160315	NZ_ACJQ02000008.1	3	4828	5104	2.1999999999999997e-177	1.0	277	ANTa	yes	no	yes	no	yes	streptomycin	streptomycin
GCF_000160315	NZ_ACJQ02000014.1	1	15818	15995	1.2e-109	0.99	178	AACg	no	no	no	no	yes	netilmicin, tobramycin, isepamicin, amikacin, sisomicin, dibekacin, kanamycin	amikacin
GCF_000182445	NZ_ACKA01000022.1	1	27337	27481	4e-44	0.95	145	AACf1	no	no	no	no	no
GCF_000174455	NZ_ACKC01000002.1	-2	48	300	3.1e-184	1.0	253	ANTb	yes	no	no	no	yes	isepamicin, tobramycin, kanamycin, dibekacin, amikacin, neomycin
GCF_000174475	NZ_ACKD01000047.1	-3	45	297	5.9e-184	1.0	253	ANTb	yes	no	no	no	yes	tobramycin, dibekacin, neomycin, kanamycin, isepamicin, amikacin
GCF_000174495	NZ_ACKE01000028.1	1	48	300	4.8e-184	1.0	253	ANTb	yes	no	no	no	yes	kanamycin, amikacin, isepamicin, dibekacin, tobramycin, neomycin
GCF_000174515	NZ_ACKF01000048.1	3	47	299	4.8e-184	1.0	253	ANTb	yes	no	no	no	yes	neomycin, isepamicin, dibekacin, tobramycin, kanamycin, amikacin
GCF_000174635	NZ_ACKL01000028.1	3	47	299	4.9e-184	1.0	253	ANTb	yes	no	no	no	yes	neomycin, tobramycin, isepamicin, kanamycin, dibekacin, amikacin
GCF_000174835	NZ_ACNO01000001.1	1	245072	245336	1.4000000000000001e-74	0.97	265	APHc	no	no	no	no	no	paromomycin, neomycin, ribostamycin
GCF_000174895	NZ_ACOK01000087.1	1	12590	12763	4.4999999999999996e-70	0.98	174	AACg	no	no	no	no	no	netilmicin, amikacin, isepamicin, sisomicin, kanamycin, dibekacin, tobramycin
GCF_000174935	NZ_ACOS01000123.1	3	2490	2653	4.4e-81	0.99	164	AACd	no	no	no	no	no
GCF_000174955	NZ_ACOT01000004.1	3	47	299	4.5e-184	1.0	253	ANTb	yes	no	no	no	yes	amikacin, neomycin, tobramycin, dibekacin, kanamycin, isepamicin
GCF_000175015	NZ_ACOX02000002.1	2	42060	42337	8e-80	0.98	278	ANTa	no	no	no	no	no	streptomycin	streptomycin
GCF_000175075	NZ_ACPC01000014.1	1	25641	25814	1.4e-42	0.95	174	AACg	no	no	no	no	no	dibekacin, sisomicin, netilmicin, kanamycin, amikacin, tobramycin, isepamicin
GCF_000182645	NZ_ACQA01000001.1	3	651429	651568	1.2e-51	0.96	140	AACf1	no	no	no	no	no
GCF_000175415	NZ_ACSK03000196.1	1	5568	5727	5.1e-50	0.95	160	AACd	no	no	no	no	no
GCF_000175475	NZ_ACSN01000072.1	-2	135	312	1.1000000000000001e-110	0.99	178	AACg	yes	no	no	no	no	isepamicin, sisomicin, amikacin, dibekacin, netilmicin, tobramycin, kanamycin	amikacin
GCF_000175495	NZ_ACSO01000036.1	3	47	299	2.2e-183	1.0	253	ANTb	yes	no	no	no	yes	kanamycin, dibekacin, amikacin, tobramycin, isepamicin, neomycin
GCF_000176195	NZ_ACZQ01000138.1	1	451	703	3.3e-183	1.0	253	ANTb	no	no	no	no	yes	amikacin, isepamicin, tobramycin, neomycin, kanamycin, dibekacin
GCF_000176295	NZ_ACZZ01000016.1	1	4686	4849	5.3e-76	0.98	164	AACd	no	no	no	no	no
GCF_000177715	NZ_ADHA01000871.1	2	50	229	2.1e-130	1.0	180	AACj	no	no	no	no	no	sisomicin, tobramycin, netilmicin, dibekacin, neomycin
GCF_000177735	NZ_ADHB01000602.1	2	1	172	5.6e-99	0.99	172	AACa	yes	no	no	yes	no	sisomicin, fortimicin, gentamicin	gentamicin
GCF_000193415	NZ_ADHJ01000006.1	1	8128	8298	1.1e-43	0.95	171	AACg	no	no	no	no	no	tobramycin, sisomicin, kanamycin, dibekacin, isepamicin, amikacin, netilmicin
GCF_000178015	NZ_ADJJ01000033.1	3	187	439	1.2e-183	1.0	253	ANTb	yes	no	no	no	yes	neomycin, kanamycin, tobramycin, isepamicin, amikacin, dibekacin
GCF_000178135	NZ_ADJR01000026.1	1	27848	27990	8.099999999999999e-49	0.98	143	AACf1	no	no	no	no	no	kanamycin, netilmicin, isepamicin, dibekacin, amikacin, tobramycin, sisomicin
GCF_000178175	NZ_ADKN01000019.1	3	7898	8175	1.8e-80	0.98	278	ANTa	no	no	no	no	no	streptomycin	streptomycin
GCF_000178235	NZ_ADMM01000049.1	1	38422	38585	1.6000000000000001e-80	0.99	164	AACd	no	no	no	no	no
GCF_000179075	NZ_ADWQ01000050.1	-1	2776	2952	8.700000000000001e-125	0.99	177	ANTd	no	no	no	yes	no	dibekacin, sisomicin, gentamicin, tobramycin, kanamycin	gentamicin, kanamycin
GCF_000179095	NZ_ADWR01000067.1	2	415	695	7.8e-124	0.99	281	AACb	no	no	no	no	no		gentamicin
GCF_000179135	NZ_ADWT01000006.1	2	2704	2880	6.3e-124	0.99	177	ANTd	no	no	no	yes	no	tobramycin, gentamicin, sisomicin, dibekacin, kanamycin	gentamicin, kanamycin
GCF_000179175	NZ_ADWV01000045.1	-3	1155	1435	2.4000000000000003e-124	0.99	281	AACb	yes	no	no	yes	no		gentamicin
GCF_000239095	NZ_AEDZ01000365.1	1	2463	2626	3.8000000000000003e-81	0.99	164	AACd	no	no	no	no	no
GCF_000331005	NZ_AEJB01000122.1	3	2735	2912	2.6e-53	0.97	178	AACc	no	no	no	no	no
GCF_000331005	NZ_AEJB01000339.1	1	1839	2130	6.3e-89	0.96	292	APHb	no	no	no	no	no
GCF_000317595	NZ_AEJC01000532.1	1	3714	3992	6.7e-92	0.96	279	APHb	no	no	no	no	no
GCF_000189655	NZ_AEOX01000035.1	3	125	304	9.9e-124	1.0	180	AACj	no	no	no	no	no	dibekacin, neomycin, netilmicin, sisomicin, tobramycin
GCF_000189675	NZ_AEOY01000021.1	1	44	223	1.8e-119	1.0	180	AACj	no	no	no	no	no	netilmicin, tobramycin, neomycin, dibekacin, sisomicin
GCF_000189395	NZ_AEPB01000018.1	2	6035	6273	8.9e-41	0.97	239	ANTb	no	no	no	no	no	amikacin, dibekacin, kanamycin, isepamicin, tobramycin, neomycin
GCF_000184475	NZ_AEPK01000068.1	3	3309	3484	6.4e-101	0.99	176	AACa	no	no	no	yes	yes	sisomicin, fortimicin, gentamicin	gentamicin
GCF_000184515	NZ_AEPM01000056.1	1	361	537	1.5000000000000002e-125	0.99	177	ANTd	yes	no	no	yes	yes	dibekacin, gentamicin, kanamycin, tobramycin, sisomicin	kanamycin, gentamicin
GCF_000192025	NZ_AEQV01000139.1	2	2273	2411	8.9e-47	0.96	139	AACf1	no	no	no	no	no
GCF_000187785	NZ_AERV01000014.1	2	202459	202602	3.2e-67	0.99	144	AACf1	no	no	no	no	no
GCF_000186645	NZ_AERY01000058.1	1	1112	1287	5.2e-101	0.99	176	AACa	yes	no	no	yes	yes	gentamicin, fortimicin, sisomicin
GCF_000186645	NZ_AERY01000108.1	1	44	223	1.7e-123	1.0	180	AACj	no	no	no	no	no	netilmicin, dibekacin, sisomicin, tobramycin, neomycin
GCF_000188335	NZ_AESH01000022.1	2	18145	18287	1e-68	0.99	143	AACf1	no	no	no	no	no
GCF_000188375	NZ_AESJ01000031.1	3	74092	74234	1.4999999999999998e-68	0.99	143	AACf1	no	no	no	no	no
GCF_000188395	NZ_AESK01000022.1	2	58844	58986	1.4999999999999998e-68	0.99	143	AACf1	no	no	no	no	no
GCF_000188415	NZ_AESL01000005.1	3	58776	58918	9.7e-69	0.99	143	AACf1	no	no	no	no	no
GCF_000188435	NZ_AESM01000004.1	-3	74068	74210	1.3999999999999998e-68	0.99	143	AACf1	no	no	no	no	no
GCF_000188455	NZ_AESN01000089.1	1	25889	26031	1.4999999999999998e-68	0.99	143	AACf1	no	no	no	no	no
GCF_000188475	NZ_AESO01000060.1	-1	30290	30432	2.2e-68	0.99	143	AACf1	no	no	no	no	no
GCF_000188495	NZ_AESP01000021.1	2	35365	35507	3e-68	0.99	143	AACf1	no	no	no	no	no
GCF_000188515	NZ_AESQ01000041.1	-2	50397	50539	2.0999999999999997e-68	0.99	143	AACf1	no	no	no	no	no
GCF_000238555	NZ_AESR01000040.1	1	60157	60299	3e-67	0.99	143	AACf1	no	no	no	no	no
GCF_000238515	NZ_AEST01000004.1	-3	59994	60136	1.7999999999999998e-68	0.99	143	AACf1	no	no	no	no	no
GCF_000238495	NZ_AESU01000043.1	2	26928	27070	1.3999999999999998e-68	0.99	143	AACf1	no	no	no	no	no
GCF_000188535	NZ_AESV01000006.1	-2	26344	26486	1e-68	0.99	143	AACf1	no	no	no	no	no
GCF_000238475	NZ_AESW01000046.1	-1	22840	22982	6.2e-69	0.99	143	AACf1	no	no	no	no	no
GCF_000238455	NZ_AESX01000025.1	-1	41696	41838	1.8e-67	0.99	143	AACf1	no	no	no	no	no
GCF_000238435	NZ_AESY01000032.1	1	29312	29455	2.2e-68	0.99	144	AACf1	no	no	no	no	no
GCF_000188555	NZ_AESZ01000008.1	-1	161254	161396	2.0999999999999997e-68	0.99	143	AACf1	no	no	no	no	no
GCF_000188575	NZ_AETA01000025.1	-2	74089	74231	1.6999999999999999e-68	0.99	143	AACf1	no	no	no	no	no
GCF_000188595	NZ_AETB01000033.1	1	74069	74211	1.7999999999999998e-68	0.99	143	AACf1	no	no	no	no	no
GCF_000188615	NZ_AETC01000014.1	-2	161351	161493	2.4e-68	0.99	143	AACf1	no	no	no	no	no
GCF_000188635	NZ_AETD01000028.1	3	161289	161431	2.6e-68	0.99	143	AACf1	no	no	no	no	no
GCF_000188655	NZ_AETE01000033.1	-1	74075	74217	1.7999999999999998e-68	0.99	143	AACf1	no	no	no	no	no
GCF_000188915	NZ_AETG01000020.1	-1	346	488	1.1999999999999998e-69	0.99	143	AACf1	no	no	no	no	no
GCF_000188935	NZ_AETH01000032.1	-1	8130	8272	4.999999999999999e-69	0.99	143	AACf1	no	no	no	no	no
GCF_000188975	NZ_AETJ01000018.1	1	4856	4998	2.9e-69	0.99	143	AACf1	no	no	no	no	no
GCF_000188995	NZ_AETK01000006.1	3	9407	9549	1.4e-69	0.99	143	AACf1	no	no	no	no	no
GCF_000189015	NZ_AETL01000177.1	-3	4424	4566	3.6999999999999997e-69	0.99	143	AACf1	no	no	no	no	no
GCF_000189035	NZ_AETM01000166.1	-2	4271	4413	2.2999999999999998e-69	0.99	143	AACf1	no	no	no	no	no
GCF_000189055	NZ_AETN01000008.1	1	57083	57225	1.1e-68	0.99	143	AACf1	no	no	no	no	no
GCF_000189075	NZ_AETO01000019.1	3	74068	74210	1.1e-68	0.99	143	AACf1	no	no	no	no	no
GCF_000189095	NZ_AETP01000026.1	3	74103	74245	1.3e-68	0.99	143	AACf1	no	no	no	no	no
GCF_000189115	NZ_AETQ01000027.1	-2	58918	59060	1.3999999999999998e-68	0.99	143	AACf1	no	no	no	no	no
GCF_000189135	NZ_AETR01000094.1	-1	9849	9991	3.1e-69	0.99	143	AACf1	no	no	no	no	no
GCF_000189155	NZ_AETS01000021.1	-2	31247	31389	1.3e-68	0.99	143	AACf1	no	no	no	no	no
GCF_000189175	NZ_AETT01000044.1	-1	1844	1986	2.4999999999999997e-69	0.99	143	AACf1	no	no	no	no	no
GCF_000189195	NZ_AETU01000088.1	2	25330	25472	1e-68	0.99	143	AACf1	no	no	no	no	no
GCF_000189215	NZ_AETV01000014.1	-2	74101	74243	1.2e-68	0.99	143	AACf1	no	no	no	no	no
GCF_000189235	NZ_AETW01000025.1	-2	9884	10026	7.3e-69	0.99	143	AACf1	no	no	no	no	no
GCF_000235645	NZ_AEUN01000498.1	3	6784	7047	1.2e-48	0.96	264	ANTa	no	no	no	no	no	streptomycin	streptomycin
GCF_000215775	NZ_AEVV03000013.1	1	2371	2529	1.8e-91	0.99	159	AACa	no	no	no	yes	no	fortimicin, gentamicin, sisomicin	gentamicin
GCF_000215775	NZ_AEVV03000013.1	1	2562	2754	1.5000000000000001e-130	0.99	193	AACe1	no	no	no	yes	no	isepamicin, tobramycin, dibekacin, sisomicin, amikacin, kanamycin, netilmicin	amikacin
GCF_000190375	NZ_AEWG01000143.1	1	11162	11306	1.1e-52	0.97	145	AACf1	no	no	no	no	no
GCF_000204455	NZ_AEXS01000025.1	3	4639	4875	1.8e-42	0.97	237	ANTb	no	no	no	no	no	kanamycin, neomycin, dibekacin, tobramycin, amikacin, isepamicin
GCF_000204455	NZ_AEXS01000055.1	1	12777	13049	4.9e-111	0.97	273	ANTa	no	no	no	no	no	streptomycin
GCF_000298315	NZ_AEYE02000003.1	3	56862	57007	4.2e-51	0.97	146	AACf1	no	no	no	no	no
GCF_000292525	NZ_AEYF01000040.1	1	69381	69518	5.8999999999999996e-49	0.95	138	AACf1	no	no	no	no	no
GCF_000231325	NZ_AEYY01000027.1	3	4629	4905	2.4e-170	1.0	277	ANTa	no	no	no	no	yes
GCF_000231325	NZ_AEYY01000044.1	1	18726	18863	1.4e-36	0.96	138	AACf1	no	no	no	no	no
GCF_000194195	NZ_AEYZ01000049.1	3	3234	3487	8.3e-76	0.96	254	APHf	no	no	no	no	yes
GCF_000194195	NZ_AEYZ01000365.1	3	1015	1277	5.6e-104	0.98	263	AACb	no	no	no	no	no
GCF_000194235	NZ_AEZL02000020.1	2	1866	2146	4.2000000000000005e-123	0.99	281	AACb	no	no	no	yes	no		gentamicin
GCF_001642285	NZ_AFAS01000237.1	-2	366	651	2.6000000000000003e-184	1.0	286	AACh	yes	no	no	no	no	tobramycin, sisomicin, gentamicin, netilmicin, dibekacin	gentamicin
GCF_001642295	NZ_AFAV01000164.1	-1	36	231	2.8999999999999995e-129	0.99	196	AACe1	yes	no	no	yes	no	amikacin, netilmicin, tobramycin, isepamicin, sisomicin, dibekacin, kanamycin
GCF_001642295	NZ_AFAV01000202.1	-2	370	710	6.800000000000001e-249	1.0	341	APHa	yes	no	no	no	no	hygromycin
GCF_001642295	NZ_AFAV01000202.1	-2	108	186	2.2e-55	0.99	79	AACi	yes	no	no	no	no	netilmicin, sisomicin, dibekacin, amikacin, tobramycin
GCF_000215005	NZ_AFCZ02000002.1	2	31540	31719	5.1e-123	1.0	180	AACj	no	no	no	no	no	dibekacin, netilmicin, tobramycin, neomycin, sisomicin
GCF_000214965	NZ_AFDA02000002.1	3	121138	121317	5.9e-122	1.0	180	AACj	no	no	no	no	no	dibekacin, netilmicin, neomycin, tobramycin, sisomicin
GCF_000214985	NZ_AFDB02000002.1	3	499492	499671	4.7e-123	1.0	180	AACj	no	no	no	no	no	dibekacin, sisomicin, netilmicin, neomycin, tobramycin
GCF_000278625	NZ_AFDK01000002.1	3	1010136	1010315	6.2e-123	1.0	180	AACj	no	no	no	no	no	neomycin, netilmicin, dibekacin, tobramycin, sisomicin
GCF_000278665	NZ_AFDL01000004.1	2	280768	280947	5.1e-122	1.0	180	AACj	no	no	no	no	no	netilmicin, neomycin, dibekacin, tobramycin, sisomicin
GCF_000278685	NZ_AFDM01000001.1	3	33647	33807	3.4000000000000003e-87	0.99	161	AACd	no	no	no	yes	yes	amikacin, sisomicin, isepamicin, tobramycin, kanamycin, netilmicin, dibekacin
GCF_000278685	NZ_AFDM01000009.1	2	240571	240750	5.4e-123	1.0	180	AACj	no	no	no	no	no	netilmicin, dibekacin, sisomicin, neomycin, tobramycin
GCF_000286615	NZ_AFDN01000002.1	2	168336	168511	1.2e-100	0.99	176	AACa	no	no	no	yes	no	fortimicin, gentamicin, sisomicin
GCF_000286615	NZ_AFDN01000002.1	1	144137	144316	3.3e-122	1.0	180	AACj	no	no	no	no	no	dibekacin, neomycin, tobramycin, netilmicin, sisomicin
GCF_000278605	NZ_AFDO01000006.1	1	343101	343280	1.5000000000000002e-124	1.0	180	AACj	no	no	no	no	no	tobramycin, neomycin, sisomicin, netilmicin, dibekacin
GCF_000238775	NZ_AFEJ01000297.1	-2	11266	11427	2.1e-46	0.96	162	AACd	no	no	no	no	no
GCF_000238775	NZ_AFEJ01000341.1	-1	2460	2724	5.999999999999999e-91	0.97	265	AACb	no	no	no	no	no
GCF_000213315	NZ_AFHW01000076.1	2	1753	2006	4.7999999999999996e-82	0.97	254	ANTb	no	no	no	no	no	tobramycin, kanamycin, isepamicin, neomycin, dibekacin, amikacin
GCF_000213315	NZ_AFHW01000144.1	2	11558	11834	2.7e-107	0.98	277	ANTa	no	no	no	no	no	streptomycin
GCF_000215425	NZ_AFNP01000061.1	1	135	312	8.9e-111	0.99	178	AACg	yes	no	no	no	no	tobramycin, isepamicin, netilmicin, amikacin, kanamycin, dibekacin, sisomicin	amikacin
GCF_000219665	NZ_AFSD01000002.1	2	8641	8781	1.6e-51	0.96	141	AACf1	no	no	no	no	no
GCF_000275785	NZ_AFSU01000047.1	2	28169	28444	1.1e-131	0.99	276	ANTa	no	no	no	no	no	streptomycin	streptomycin
GCF_000222225	NZ_AFSZ01000023.1	2	1	171	5.300000000000001e-100	0.99	171	AACa	no	no	no	yes	no	sisomicin, fortimicin, gentamicin
GCF_000222225	NZ_AFSZ01000063.1	1	44	223	3.2e-120	1.0	180	AACj	no	no	no	no	no	tobramycin, neomycin, netilmicin, dibekacin, sisomicin
GCF_000222245	NZ_AFTA01000017.1	3	37	197	9.300000000000001e-89	0.99	161	AACd	no	no	no	no	no	amikacin, sisomicin, dibekacin, isepamicin, kanamycin, tobramycin, netilmicin
GCF_000222245	NZ_AFTA01000018.1	2	1	157	4.3e-91	0.99	157	AACa	no	no	no	yes	no	fortimicin, gentamicin, sisomicin
GCF_000222245	NZ_AFTA01000064.1	2	44	223	1.2e-123	1.0	180	AACj	no	no	no	no	no	tobramycin, netilmicin, sisomicin, neomycin, dibekacin
GCF_000222265	NZ_AFTB01000019.1	3	44	204	2.2e-88	0.99	161	AACd	no	no	no	no	no	isepamicin, dibekacin, amikacin, sisomicin, netilmicin, kanamycin, tobramycin
GCF_000222445	NZ_AFVQ02000205.1	3	4924	5203	3.8000000000000004e-80	0.95	280	ANTa	no	no	no	no	no	streptomycin	streptomycin
GCF_000231075	NZ_AFWY03000050.1	2	15282	15454	1.3000000000000002e-57	0.97	173	AACc	no	no	no	no	no	netilmicin, sisomicin, neomycin, dibekacin, tobramycin
GCF_000223435	NZ_AFXH01000117.1	1	57	250	8.8e-128	0.99	194	AACe1	yes	no	no	yes	yes	tobramycin, amikacin, sisomicin, netilmicin, kanamycin, dibekacin, isepamicin	amikacin
GCF_000223925	NZ_AFXI01000001.1	-2	1207032	1207226	5.5e-131	0.99	195	AACe1	no	no	yes	yes	no	kanamycin, amikacin, tobramycin, sisomicin, dibekacin, netilmicin, isepamicin	amikacin
GCF_000223945	NZ_AFXJ01000001.1	3	1056755	1056949	2.7e-131	0.99	195	AACe1	no	no	yes	yes	no	isepamicin, amikacin, netilmicin, tobramycin, sisomicin, dibekacin, kanamycin	amikacin
GCF_000223965	NZ_AFXK01000001.1	-2	1179983	1180177	2.6e-131	0.99	195	AACe1	no	no	yes	yes	no	netilmicin, kanamycin, dibekacin, isepamicin, tobramycin, amikacin, sisomicin	amikacin
GCF_000224395	NZ_AFYG01000090.1	-1	428	693	6e-188	1.0	266	APHf	yes	no	no	no	no	streptomycin
GCF_000411795	NZ_AFYW01000007.1	-1	87763	87906	6.2e-67	0.99	144	AACf1	no	no	no	no	no
GCF_000411815	NZ_AFYX01000005.1	-1	126187	126330	8.8e-67	0.99	144	AACf1	no	no	no	no	no
GCF_000411835	NZ_AFYY01000005.1	-2	87744	87887	5.5e-67	0.99	144	AACf1	no	no	no	no	no
GCF_000411855	NZ_AFYZ01000007.1	-1	126272	126415	6.4e-67	0.99	144	AACf1	no	no	no	no	no
GCF_000411875	NZ_AFZA01000007.1	-2	126460	126603	6.4e-67	0.99	144	AACf1	no	no	no	no	no
GCF_000240505	NZ_AGAQ01000111.1	3	8372	8549	1.6e-78	0.99	178	AACc	no	no	no	no	no	sisomicin, tobramycin, netilmicin, dibekacin, neomycin
GCF_000224945	NZ_AGBD01000808.1	3	61	290	8.3e-103	0.99	230	APHh	no	no	no	no	no		gentamicin, amikacin
GCF_000225525	NZ_AGBF01000002.1	1	45657	45962	7.9e-161	0.99	306	APHb	no	no	no	no	no
GCF_000230465	NZ_AGFH01000004.1	3	955	1131	2.1000000000000003e-123	0.99	177	ANTd	yes	no	no	yes	no	gentamicin, dibekacin, kanamycin, sisomicin, tobramycin	kanamycin, gentamicin
GCF_000230755	NZ_AGFW01000003.1	1	123499	123777	1e-155	0.99	279	ANTa	no	no	no	no	no	streptomycin
GCF_000230915	NZ_AGIP01000024.1	2	7235	7470	7.1e-41	0.96	236	ANTb	no	no	no	no	no	isepamicin, kanamycin, neomycin, dibekacin, amikacin, tobramycin
GCF_000230915	NZ_AGIP01000026.1	2	7709	7973	1.5999999999999998e-109	0.98	265	ANTa	no	no	no	no	no	streptomycin
GCF_000230935	NZ_AGIQ01000002.1	-3	383043	383225	3.3000000000000003e-81	0.98	183	AACc	no	no	no	no	no	sisomicin, neomycin, dibekacin, tobramycin, netilmicin
GCF_000259895	NZ_AGNH01000220.1	1	6576	6856	6.5e-100	0.97	281	APHb	no	no	no	no	no
GCF_000238575	NZ_AGNS01000038.1	3	6	282	5.000000000000001e-75	0.98	277	ANTa	no	no	no	no	no	streptomycin	streptomycin
GCF_000278385	NZ_AGQP01000006.1	3	37333	37506	2.9e-52	0.98	174	AACg	no	no	no	no	no	kanamycin, isepamicin, dibekacin, netilmicin, tobramycin, amikacin, sisomicin
GCF_000231155	NZ_AGQU01000007.1	-1	25515	25689	7.8e-71	0.97	175	AACc	no	no	no	no	no	netilmicin, dibekacin, neomycin, tobramycin, sisomicin
GCF_000239675	NZ_AGRP01000039.1	3	50	302	9.300000000000001e-184	1.0	253	ANTb	yes	no	no	no	yes	isepamicin, dibekacin, tobramycin, amikacin, kanamycin, neomycin
GCF_000770885	NZ_AGSS01000114.1	2	61	240	1.7e-123	1.0	180	AACj	no	no	no	no	no	tobramycin, netilmicin, sisomicin, neomycin, dibekacin
GCF_000233935	NZ_AGSZ01000633.1	-2	1772	1954	8.5e-84	0.97	183	AACc	no	no	no	no	no	dibekacin, netilmicin, neomycin, tobramycin, sisomicin
GCF_000220005	NZ_AGTD01000004.1	1	6954	7294	6.300000000000001e-249	1.0	341	APHa	yes	no	no	no	yes	hygromycin
GCF_000220005	NZ_AGTD01000004.1	1	6692	6770	1.4999999999999999e-55	0.99	79	AACi	yes	no	no	no	yes	sisomicin, netilmicin, dibekacin, amikacin, tobramycin
GCF_000260275	NZ_AGUA01000041.1	1	135	312	1.5e-110	0.99	178	AACg	yes	no	no	no	no	amikacin, sisomicin, netilmicin, tobramycin, dibekacin, isepamicin, kanamycin	amikacin
GCF_000234585	NZ_AGVE01000023.1	3	15570	15745	6.599999999999999e-82	0.99	176	AACc	no	no	no	no	no	tobramycin, netilmicin, neomycin, sisomicin, dibekacin
GCF_000259815	NZ_AGVS01000443.1	-1	5173	5317	1.6999999999999998e-43	0.95	145	AACf1	no	no	no	no	no
GCF_000236945	NZ_AGVV01000004.1	3	13813	14098	3.2e-169	1.0	286	AACh	no	no	no	no	no	dibekacin, netilmicin, tobramycin, sisomicin, gentamicin	gentamicin
GCF_000241685	NZ_AHAH01000003.1	1	165	341	3.5e-126	0.99	177	ANTd	no	no	no	yes	yes	gentamicin, sisomicin, dibekacin, tobramycin, kanamycin	gentamicin, kanamycin
GCF_000241705	NZ_AHAI01000005.1	1	550	721	1.6999999999999998e-47	0.95	172	AACg	yes	no	no	no	no	sisomicin, isepamicin, kanamycin, dibekacin, netilmicin, amikacin, tobramycin
GCF_000241725	NZ_AHAJ01000027.1	2	669	848	5e-126	1.0	180	AACj	no	no	no	no	no	neomycin, tobramycin, sisomicin, dibekacin, netilmicin
GCF_000239055	NZ_AHAR01000016.1	3	40678	40852	1.1999999999999999e-70	0.97	175	AACc	no	no	no	no	no	dibekacin, netilmicin, neomycin, tobramycin, sisomicin
GCF_000239035	NZ_AHAS01000018.1	3	40463	40637	3.2e-70	0.97	175	AACc	no	no	no	no	no	netilmicin, tobramycin, sisomicin, dibekacin, neomycin
GCF_000237045	NZ_AHAY01000232.1	3	1233	1376	8.8e-54	0.98	144	AACf1	no	no	no	no	no	amikacin, kanamycin, sisomicin, isepamicin, netilmicin, tobramycin, dibekacin
GCF_000242715	NZ_AHBF01000060.1	2	21803	22092	6.8e-97	0.96	290	APHb	no	no	no	no	no
GCF_000262815	NZ_AHBK01000097.1	2	145	397	1.5e-183	1.0	253	ANTb	yes	no	no	no	yes	tobramycin, isepamicin, neomycin, amikacin, kanamycin, dibekacin
GCF_000262835	NZ_AHBL01000074.1	1	153	405	1.1e-183	1.0	253	ANTb	yes	no	no	no	yes	amikacin, kanamycin, isepamicin, tobramycin, dibekacin, neomycin
GCF_000262835	NZ_AHBL01000082.1	1	270	447	1.9999999999999998e-110	0.99	178	AACg	yes	no	no	no	yes	sisomicin, netilmicin, tobramycin, amikacin, dibekacin, kanamycin, isepamicin
GCF_000262895	NZ_AHBO01000001.1	-2	214	466	1.2e-183	1.0	253	ANTb	yes	no	no	no	yes	dibekacin, isepamicin, amikacin, neomycin, kanamycin, tobramycin
GCF_000262935	NZ_AHBQ01000058.1	2	206	458	1.5999999999999999e-183	1.0	253	ANTb	yes	no	no	no	yes	isepamicin, tobramycin, kanamycin, amikacin, dibekacin, neomycin
GCF_000262935	NZ_AHBQ01000086.1	1	145	322	1.5e-110	0.99	178	AACg	yes	no	no	no	no	kanamycin, sisomicin, amikacin, dibekacin, tobramycin, isepamicin, netilmicin
GCF_000262955	NZ_AHBR01000063.1	2	259	436	1.6e-110	0.99	178	AACg	yes	no	no	no	yes	sisomicin, amikacin, isepamicin, tobramycin, dibekacin, netilmicin, kanamycin	amikacin
GCF_000262995	NZ_AHBT01000002.1	-3	170	422	7.999999999999999e-184	1.0	253	ANTb	yes	no	no	no	yes	amikacin, isepamicin, dibekacin, kanamycin, neomycin, tobramycin
GCF_000236985	NZ_AHBX01000154.1	1	2006	2286	2.3000000000000002e-125	0.99	281	AACb	no	no	no	no	no
GCF_000241835	NZ_AHGS01001530.1	1	2647	2924	5.8e-99	0.97	278	APHb	no	no	no	no	yes
GCF_000240785	NZ_AHHR01000042.1	-3	161312	161454	3.3e-68	0.99	143	AACf1	no	no	no	no	no
GCF_000240805	NZ_AHHS01000126.1	-3	75	217	9.699999999999999e-70	0.99	143	AACf1	no	no	no	no	no
GCF_000240825	NZ_AHHT01000035.1	-2	58775	58917	1.6999999999999999e-68	0.99	143	AACf1	no	no	no	no	no
GCF_000240845	NZ_AHHU01000012.1	3	43744	43886	1.1e-68	0.99	143	AACf1	no	no	no	no	no
GCF_000240865	NZ_AHHV01000008.1	-2	148773	148915	2.5e-68	0.99	143	AACf1	no	no	no	no	no
GCF_000240885	NZ_AHHW01000003.1	-3	3409	3551	4.1e-69	0.99	143	AACf1	no	no	no	no	no
GCF_000240245	NZ_AHHX01000129.1	3	5993	6173	1.1e-103	0.99	181	AACc	no	no	no	no	no	tobramycin, sisomicin, netilmicin, dibekacin, neomycin
GCF_000248395	NZ_AHIE01000053.1	1	1	157	9.999999999999999e-92	0.99	157	AACa	no	no	no	no	no	sisomicin, gentamicin, fortimicin	gentamicin
GCF_000242795	NZ_AHIK01000034.1	2	154883	155025	2.5e-68	0.99	143	AACf1	no	no	no	no	no
GCF_000259735	NZ_AHJA01000087.1	-1	6191	6335	1.1e-43	0.95	145	AACf1	no	no	no	no	no
GCF_000259755	NZ_AHJB01000179.1	-1	4442	4586	1.1e-44	0.95	145	AACf1	no	no	no	no	no
GCF_000259775	NZ_AHJC01000178.1	-3	4425	4569	7.8e-45	0.95	145	AACf1	no	no	no	no	no
GCF_000268285	NZ_AHJU02000012.1	1	9583	9845	5.4e-106	0.98	263	AACb	no	no	no	no	no		gentamicin
GCF_000242475	NZ_AHJV01000029.1	3	663	939	4.1e-177	1.0	277	ANTa	no	no	no	no	no	streptomycin	streptomycin
GCF_000242575	NZ_AHKA01000032.1	-3	663	939	3.6e-177	1.0	277	ANTa	no	no	no	no	no	streptomycin	streptomycin
GCF_000248495	NZ_AHKD01000003.1	-3	1278	1455	1.5e-110	0.99	178	AACg	yes	no	no	no	yes	dibekacin, tobramycin, isepamicin, kanamycin, amikacin, netilmicin, sisomicin	amikacin
GCF_000248595	NZ_AHKE01000001.1	-2	5758	6010	3.3e-182	1.0	253	ANTb	no	no	no	no	yes	kanamycin, amikacin, isepamicin, dibekacin, neomycin, tobramycin
GCF_000245555	NZ_AHKH01000062.1	1	4950	5200	6.100000000000001e-74	0.97	251	ANTb	no	no	no	no	no	amikacin, isepamicin, tobramycin, neomycin, kanamycin, dibekacin
GCF_000245555	NZ_AHKH01000178.1	1	7311	7589	4.6e-143	0.99	279	ANTa	no	no	no	no	no	streptomycin
GCF_000346255	NZ_AHKL01000032.1	3	79757	80034	3.3e-139	0.99	278	ANTa	no	no	no	no	no	streptomycin	streptomycin
GCF_000245635	NZ_AHKX01000010.1	2	135	312	1.1000000000000001e-110	0.99	178	AACg	yes	no	no	no	no	isepamicin, kanamycin, tobramycin, sisomicin, netilmicin, dibekacin, amikacin
GCF_000245635	NZ_AHKX01000025.1	3	76	328	6.1e-185	1.0	253	ANTb	yes	no	no	no	no	kanamycin, dibekacin, tobramycin, amikacin, neomycin, isepamicin
GCF_000245675	NZ_AHKZ01000065.1	-3	663	939	6.1999999999999995e-177	1.0	277	ANTa	no	no	no	no	no	streptomycin	streptomycin
GCF_000247025	NZ_AHLA01000053.1	2	135	312	1.1000000000000001e-110	0.99	178	AACg	yes	no	no	no	no	dibekacin, kanamycin, amikacin, isepamicin, tobramycin, netilmicin, sisomicin
GCF_000247025	NZ_AHLA01000067.1	-2	48	300	8.7e-184	1.0	253	ANTb	yes	no	no	no	yes	amikacin, kanamycin, tobramycin, dibekacin, isepamicin, neomycin
GCF_000247065	NZ_AHLC01000030.1	-1	135	312	7.700000000000001e-111	0.99	178	AACg	yes	no	no	no	no	kanamycin, dibekacin, tobramycin, isepamicin, sisomicin, netilmicin, amikacin	amikacin
GCF_000247145	NZ_AHLG01000043.1	-2	135	312	9.999999999999999e-111	0.99	178	AACg	yes	no	no	no	no	dibekacin, tobramycin, amikacin, netilmicin, isepamicin, sisomicin, kanamycin
GCF_000247145	NZ_AHLG01000044.1	2	48	300	7.8e-184	1.0	253	ANTb	yes	no	no	no	yes	dibekacin, amikacin, neomycin, kanamycin, tobramycin, isepamicin
GCF_000247275	NZ_AHLL01000004.1	2	155	407	1.1e-183	1.0	253	ANTb	yes	no	no	no	yes	isepamicin, neomycin, dibekacin, amikacin, kanamycin, tobramycin
GCF_000247375	NZ_AHLR01000039.1	-2	48	300	1.3e-183	1.0	253	ANTb	yes	no	no	no	no	amikacin, neomycin, dibekacin, isepamicin, kanamycin, tobramycin
GCF_000247375	NZ_AHLR01000081.1	-2	300	477	3.3e-110	0.99	178	AACg	yes	no	no	no	yes	dibekacin, netilmicin, sisomicin, kanamycin, amikacin, tobramycin, isepamicin
GCF_000339415	NZ_AHSN01000013.1	2	762	1038	7.2e-176	1.0	277	ANTa	no	no	no	no	no	streptomycin	streptomycin
GCF_000272635	NZ_AHTK01000033.1	-2	57503	57646	3.8e-67	0.99	144	AACf1	no	no	no	no	no
GCF_000272655	NZ_AHTL01000040.1	3	57552	57695	3.8e-67	0.99	144	AACf1	no	no	no	no	no
GCF_000272675	NZ_AHTM01000048.1	3	57543	57686	4.5e-67	0.99	144	AACf1	no	no	no	no	no
GCF_000272535	NZ_AHTN01000026.1	1	159086	159229	6.8e-67	0.99	144	AACf1	no	no	no	no	no
GCF_000272555	NZ_AHTO01000051.1	1	57556	57699	2.5000000000000003e-67	0.99	144	AACf1	no	no	no	no	no
GCF_000272575	NZ_AHTP01000011.1	-3	57372	57515	8.9e-66	0.99	144	AACf1	no	no	no	no	no
GCF_000272695	NZ_AHTQ01000015.1	1	57399	57542	1.2e-67	0.99	144	AACf1	no	no	no	no	no
GCF_000272595	NZ_AHTR01000015.1	-1	43269	43412	7e-66	0.99	144	AACf1	no	no	no	no	no
GCF_000272615	NZ_AHTS01000021.1	3	73609	73752	4.8e-67	0.99	144	AACf1	no	no	no	no	no
GCF_000272915	NZ_AHUB01000019.1	-3	17428	17571	2.5000000000000003e-67	0.99	144	AACf1	no	no	no	no	no
GCF_000272935	NZ_AHUC01000028.1	3	57413	57556	6.7999999999999995e-68	0.99	144	AACf1	no	no	no	no	no
GCF_000272955	NZ_AHUD01000024.1	-2	7507	7650	7.099999999999999e-68	0.99	144	AACf1	no	no	no	no	no
GCF_000272975	NZ_AHUE01000058.1	3	57114	57257	1.3000000000000001e-67	0.99	144	AACf1	no	no	no	no	no
GCF_000272855	NZ_AHUF01000024.1	2	98379	98522	2.9e-67	0.99	144	AACf1	no	no	no	no	no
GCF_000272875	NZ_AHUG01000006.1	3	68342	68485	1.4e-67	0.99	144	AACf1	no	no	no	no	no
GCF_000335835	NZ_AHUI01000016.1	-1	8234	8377	8.099999999999999e-68	0.99	144	AACf1	no	no	no	no	no
GCF_000336015	NZ_AHUJ01000010.1	1	12130	12273	9.7e-68	0.99	144	AACf1	no	no	no	no	no
GCF_000336035	NZ_AHUK01000019.1	2	19360	19503	1.3000000000000001e-67	0.99	144	AACf1	no	no	no	no	no
GCF_000336055	NZ_AHUL01000096.1	1	628	771	1.6e-67	0.99	144	AACf1	no	no	no	no	no
GCF_000336075	NZ_AHUM01000172.1	-3	65	208	2.5999999999999997e-69	0.99	144	AACf1	no	no	no	no	no
GCF_000335855	NZ_AHUN01000152.1	3	4537	4680	9.9e-68	0.99	144	AACf1	no	no	no	no	no
GCF_000335895	NZ_AHUQ01000045.1	-2	56944	57087	6.5e-67	0.99	144	AACf1	no	no	no	no	no
GCF_000336115	NZ_AHUR01000069.1	1	1626	1769	7e-68	0.99	144	AACf1	no	no	no	no	no
GCF_000335915	NZ_AHUS01000003.1	3	58417	58560	2.8e-67	0.99	144	AACf1	no	no	no	no	no
GCF_000335935	NZ_AHUT01000053.1	-3	102983	103126	3.8e-67	0.99	144	AACf1	no	no	no	no	no
GCF_000336135	NZ_AHUU01000069.1	2	11789	11932	8.8e-68	0.99	144	AACf1	no	no	no	no	no
GCF_000335955	NZ_AHUW01000016.1	2	8387	8529	4.4e-68	0.99	143	AACf1	no	no	no	no	no
GCF_000335975	NZ_AHUX01000083.1	3	25888	26030	1.4999999999999998e-68	0.99	143	AACf1	no	no	no	no	no
GCF_000336175	NZ_AHUY01000034.1	-3	59296	59439	1.2e-67	0.99	144	AACf1	no	no	no	no	no
GCF_000259995	NZ_AHVC01000039.1	2	265	442	2.7000000000000004e-110	0.99	178	AACg	yes	no	no	no	yes	dibekacin, sisomicin, amikacin, kanamycin, netilmicin, tobramycin, isepamicin	amikacin
GCF_000248755	NZ_AHVF01000003.1	-1	6228	6480	3.3e-182	1.0	253	ANTb	no	no	yes	no	yes	kanamycin, tobramycin, amikacin, isepamicin, neomycin, dibekacin
GCF_000248635	NZ_AHVG01000006.1	-1	121	373	3.1e-184	1.0	253	ANTb	yes	no	no	no	yes	amikacin, dibekacin, neomycin, kanamycin, tobramycin, isepamicin
GCF_000248955	NZ_AHVL01000001.1	-3	5518	5770	1.5999999999999999e-183	1.0	253	ANTb	no	no	yes	no	yes	neomycin, dibekacin, tobramycin, isepamicin, amikacin, kanamycin
GCF_000248955	NZ_AHVL01000014.1	-3	1801	1978	2.2000000000000002e-110	0.99	178	AACg	yes	no	no	no	yes	amikacin, isepamicin, sisomicin, kanamycin, netilmicin, tobramycin, dibekacin
GCF_000248675	NZ_AHVQ01000001.1	-2	5167	5419	2.9000000000000002e-182	1.0	253	ANTb	no	no	no	no	yes	dibekacin, neomycin, isepamicin, amikacin, kanamycin, tobramycin
GCF_000248675	NZ_AHVQ01000002.1	3	12992	13169	8.100000000000001e-110	0.99	178	AACg	yes	no	yes	no	yes	kanamycin, sisomicin, netilmicin, dibekacin, tobramycin, isepamicin, amikacin
GCF_000248875	NZ_AHVS01000001.1	-1	4962	5214	3.3e-182	1.0	253	ANTb	no	no	yes	no	yes	tobramycin, amikacin, dibekacin, neomycin, isepamicin, kanamycin
GCF_000248775	NZ_AHVU01000001.1	-1	6545	6797	3.3e-182	1.0	253	ANTb	no	no	no	no	yes	isepamicin, amikacin, tobramycin, neomycin, kanamycin, dibekacin
GCF_000248775	NZ_AHVU01000002.1	-1	7256	7433	5.5e-110	0.99	178	AACg	yes	no	no	no	yes	kanamycin, isepamicin, amikacin, dibekacin, tobramycin, netilmicin, sisomicin
GCF_000248835	NZ_AHVV01000005.1	-1	86409	86661	4.7000000000000004e-182	1.0	253	ANTb	no	no	no	no	yes	amikacin, tobramycin, kanamycin, isepamicin, neomycin, dibekacin
GCF_000248795	NZ_AHVW01000009.1	1	2062	2239	2.5e-110	0.99	178	AACg	yes	no	no	no	yes	dibekacin, isepamicin, kanamycin, netilmicin, sisomicin, tobramycin, amikacin	amikacin
GCF_000248615	NZ_AHVX01000020.1	-3	6204	6456	1e-181	1.0	253	ANTb	no	no	yes	no	yes	tobramycin, dibekacin, kanamycin, isepamicin, neomycin, amikacin
GCF_000401575	NZ_AHZI01000035.1	2	672	948	1e-176	1.0	277	ANTa	no	no	no	no	no	streptomycin	streptomycin
GCF_000401475	NZ_AHZL01000101.1	3	143	320	1.5e-110	0.99	178	AACg	yes	no	no	no	no	dibekacin, tobramycin, kanamycin, amikacin, sisomicin, netilmicin, isepamicin	amikacin
GCF_000260015	NZ_AICH01000066.1	2	135	312	2.4e-110	0.99	178	AACg	yes	no	no	no	no	tobramycin, isepamicin, kanamycin, netilmicin, sisomicin, amikacin, dibekacin	amikacin
GCF_000260015	NZ_AICH01000124.1	-2	685	961	1.3e-176	1.0	277	ANTa	no	no	no	no	no	streptomycin	streptomycin
GCF_000260055	NZ_AICJ01000023.1	-1	288	465	1.5e-110	0.99	178	AACg	yes	no	no	no	yes	sisomicin, tobramycin, dibekacin, netilmicin, amikacin, isepamicin, kanamycin	amikacin
GCF_000248195	NZ_AIED01000006.1	1	195	374	3.3e-92	1.0	180	AACj	no	no	no	no	no
GCF_000248195	NZ_AIED01000028.1	3	13690	13833	8e-71	0.99	144	AACf1	no	no	no	no	no
GCF_000248275	NZ_AIEH01000062.1	1	444	636	2.6e-130	0.99	193	AACe1	yes	no	no	yes	yes	kanamycin, amikacin, isepamicin, dibekacin, netilmicin, tobramycin, sisomicin	amikacin
GCF_000248315	NZ_AIEJ01000004.1	2	187	366	1.1e-104	1.0	180	AACj	no	no	no	no	no	tobramycin, netilmicin, neomycin, dibekacin, sisomicin
GCF_000248575	NZ_AIEP01000003.1	1	60	237	4.8e-110	0.99	178	AACg	yes	no	no	no	no	netilmicin, sisomicin, isepamicin, kanamycin, dibekacin, tobramycin, amikacin	amikacin
GCF_000265445	NZ_AIPP01000133.1	2	5348	5601	1.6000000000000001e-74	0.98	254	ANTb	no	no	no	no	no	tobramycin, amikacin, dibekacin, isepamicin, neomycin, kanamycin
GCF_000478305	NZ_AITP01000009.1	3	68537	68700	1.3e-80	0.99	164	AACd	no	no	no	no	no
GCF_000257145	NZ_AJFF01000014.1	1	5092	5234	1.9e-50	0.96	143	AACf1	no	no	no	no	no	amikacin, isepamicin, dibekacin, netilmicin, kanamycin, tobramycin, sisomicin
GCF_000252805	NZ_AJFG01000062.1	-2	2129	2409	2.8000000000000004e-124	0.99	281	AACb	yes	no	no	yes	no		gentamicin
GCF_000257725	NZ_AJFJ01000061.1	-2	18296	18477	6.399999999999999e-85	0.99	182	AACc	no	no	no	no	no	neomycin, netilmicin, tobramycin, sisomicin, dibekacin
GCF_000257225	NZ_AJGF01000003.1	-2	28944	29118	1.7999999999999998e-69	0.97	175	AACc	no	no	no	no	no	neomycin, tobramycin, dibekacin, sisomicin, netilmicin
GCF_000257245	NZ_AJGG01000032.1	2	21497	21671	3.1e-69	0.97	175	AACc	no	no	no	no	no	sisomicin, dibekacin, netilmicin, neomycin, tobramycin
GCF_000256015	NZ_AJGK01000113.1	-1	14923	15066	8e-67	0.99	144	AACf1	no	no	no	no	no
GCF_000516455	NZ_AJGM01000153.1	3	6516	6696	2.8e-103	0.99	181	AACc	no	no	no	no	no	netilmicin, tobramycin, dibekacin, neomycin, sisomicin
GCF_000516395	NZ_AJGO01000050.1	2	6378	6558	3.2e-103	0.99	181	AACc	no	no	no	no	no	sisomicin, tobramycin, neomycin, dibekacin, netilmicin
GCF_000256625	NZ_AJGW01000012.1	1	83291	83434	9.8e-67	0.99	144	AACf1	no	no	no	no	no
GCF_000256625	NZ_AJGW01000026.1	-2	57	342	5.9e-185	1.0	286	AACh	yes	no	no	no	no
GCF_000284755	NZ_AJGX01000001.1	-1	82239	82382	2.2e-66	0.99	144	AACf1	no	no	no	no	no
GCF_000284755	NZ_AJGX01000038.1	2	57	342	8.1e-185	1.0	286	AACh	yes	no	no	no	no
GCF_000284775	NZ_AJGY01000142.1	2	57	342	1.4e-184	1.0	286	AACh	yes	no	no	no	no	dibekacin, gentamicin, tobramycin, sisomicin, netilmicin	gentamicin
GCF_000284795	NZ_AJGZ01000025.1	1	83292	83435	1.7e-66	0.99	144	AACf1	no	no	no	no	no
GCF_000284795	NZ_AJGZ01000048.1	2	57	342	9.999999999999999e-185	1.0	286	AACh	yes	no	no	no	no
GCF_000284815	NZ_AJHA01000012.1	3	417	682	8.7e-188	1.0	266	APHf	yes	no	no	no	no
GCF_000284815	NZ_AJHA01000076.1	-3	62005	62148	2.0000000000000002e-66	0.99	144	AACf1	no	no	no	no	no
GCF_000257945	NZ_AJJR01000013.1	2	393	645	2.4e-184	1.0	253	ANTb	no	no	no	no	yes	neomycin, dibekacin, amikacin, tobramycin, isepamicin, kanamycin
GCF_000257945	NZ_AJJR01000030.1	-3	12	64	9.999999999999999e-43	0.99	53	ANTe	yes	no	no	no	no	isepamicin, neomycin, kanamycin, tobramycin, dibekacin, amikacin
GCF_000257965	NZ_AJJS01000040.1	-1	542	794	7.500000000000001e-184	1.0	253	ANTb	yes	no	no	no	yes	isepamicin, neomycin, tobramycin, dibekacin, kanamycin, amikacin
GCF_000463035	NZ_AJKD01000039.1	3	271	448	1.1000000000000001e-110	0.99	178	AACg	yes	no	no	no	yes	sisomicin, amikacin, netilmicin, kanamycin, dibekacin, tobramycin, isepamicin	amikacin
GCF_000317245	NZ_AJLJ01000250.1	-1	4267	4410	8.1e-46	0.98	144	AACf1	no	no	no	no	no
GCF_000317205	NZ_AJLK01000114.1	2	9242	9384	3.2999999999999997e-46	0.98	143	AACf1	no	no	no	no	no
GCF_000280745	NZ_AJLX01000035.1	-1	145	322	9.1e-111	0.99	178	AACg	yes	no	no	no	no	sisomicin, amikacin, netilmicin, kanamycin, isepamicin, dibekacin, tobramycin	amikacin
GCF_000280745	NZ_AJLX01000048.1	-1	678	954	3.3999999999999996e-177	1.0	277	ANTa	yes	no	no	no	no	streptomycin	streptomycin
GCF_000260615	NZ_AJLY02000061.1	2	15082	15256	8.8e-70	0.97	175	AACc	no	no	no	no	no	netilmicin, sisomicin, neomycin, dibekacin, tobramycin
GCF_000260595	NZ_AJLZ01000001.1	-3	271679	271853	1.4e-69	0.97	175	AACc	no	no	no	no	no	dibekacin, neomycin, netilmicin, tobramycin, sisomicin
GCF_000260575	NZ_AJMA01000007.1	-1	28357	28531	4.6e-70	0.97	175	AACc	no	no	no	no	no	neomycin, dibekacin, tobramycin, netilmicin, sisomicin
GCF_000259135	NZ_AJPQ01000164.1	-2	353	693	6.600000000000001e-249	1.0	341	APHa	yes	no	no	no	no	hygromycin
GCF_000259135	NZ_AJPQ01000164.1	-2	91	169	2.2999999999999998e-55	0.99	79	AACi	yes	no	no	no	no	sisomicin, netilmicin, dibekacin, amikacin, tobramycin
GCF_000261525	NZ_AJPW01000531.1	1	3785	4042	2e-89	0.96	258	APHf	no	no	no	no	yes	streptomycin
GCF_000296975	NZ_AJQX01000024.1	2	2473	2636	3.4e-80	0.99	164	AACd	no	no	no	no	no
GCF_000296895	NZ_AJQZ01000004.1	1	4384	4547	4.7000000000000005e-80	0.99	164	AACd	no	no	no	no	no
GCF_000296935	NZ_AJRD01000010.1	2	4383	4546	4.5e-80	0.99	164	AACd	no	no	no	no	no
GCF_000302675	NZ_AJRF02000006.1	2	4383	4546	8.200000000000001e-81	0.99	164	AACd	no	no	no	no	no
GCF_000261085	NZ_AJSC01000005.1	-3	25530	25704	5.899999999999999e-70	0.97	175	AACc	no	no	no	no	no	netilmicin, tobramycin, dibekacin, neomycin, sisomicin
GCF_000261105	NZ_AJSD01000026.1	-2	5474	5648	2.3e-70	0.97	175	AACc	no	no	no	no	no	netilmicin, sisomicin, tobramycin, dibekacin, neomycin
GCF_000261125	NZ_AJSE01000003.1	-2	33621	33795	4.1999999999999996e-70	0.97	175	AACc	no	no	no	no	no	tobramycin, neomycin, netilmicin, dibekacin, sisomicin
GCF_000259405	NZ_AJST01000001.1	2	174381	174656	6.1e-133	0.99	276	ANTa	no	no	no	no	no	streptomycin	streptomycin
GCF_000262635	NZ_AJTD01000131.1	-2	303	446	5.3999999999999995e-68	0.99	144	AACf1	no	no	no	no	no
GCF_000262615	NZ_AJTE01000155.1	-3	7735	7878	8.6e-67	0.99	144	AACf1	no	no	no	no	no
GCF_000306055	NZ_AJTL01000152.1	1	3089	3227	2.9e-47	0.96	139	AACf1	no	no	no	no	yes
GCF_000292755	NZ_AJTU01000002.1	1	197895	198038	1.4e-67	0.99	144	AACf1	no	no	no	no	no
GCF_000261985	NZ_AJVD01000002.1	-1	97181	97324	6.700000000000001e-67	0.99	144	AACf1	no	no	no	no	no
GCF_000263955	NZ_AJVT01000087.1	3	353	693	4.1e-248	1.0	341	APHa	no	no	no	no	no	hygromycin
GCF_000263955	NZ_AJVT01000087.1	3	91	169	1.1999999999999999e-54	0.99	79	AACi	no	no	no	no	no	tobramycin, netilmicin, sisomicin, amikacin, dibekacin
GCF_000267565	NZ_AJXA01000034.1	2	39894	40037	1.9000000000000001e-66	0.99	144	AACf1	no	no	no	no	no
GCF_000275905	NZ_AJXF01000028.1	-3	1679	1818	3.9e-57	0.95	140	AACf1	no	no	no	no	no
GCF_000286375	NZ_AJXM01000138.1	3	4213	4355	9.7e-51	0.98	143	AACf1	no	no	no	no	no	isepamicin, sisomicin, dibekacin, tobramycin, kanamycin, amikacin, netilmicin
GCF_000281255	NZ_AJZV01000094.1	3	168	360	2.4e-131	0.99	193	AACe1	yes	no	no	yes	no	sisomicin, tobramycin, dibekacin, amikacin, kanamycin, netilmicin, isepamicin	amikacin
GCF_000281395	NZ_AJZW01000119.1	3	170	362	2.6e-131	0.99	193	AACe1	yes	no	no	yes	no	kanamycin, sisomicin, isepamicin, amikacin, dibekacin, netilmicin, tobramycin	amikacin
GCF_000281275	NZ_AJZX01000112.1	1	166	358	2.7e-131	0.99	193	AACe1	yes	no	no	yes	no	amikacin, kanamycin, dibekacin, isepamicin, tobramycin, sisomicin, netilmicin	amikacin
GCF_000281295	NZ_AJZY01000104.1	2	172	364	2.5e-131	0.99	193	AACe1	yes	no	no	yes	no	amikacin, tobramycin, netilmicin, dibekacin, isepamicin, sisomicin, kanamycin	amikacin
GCF_000281415	NZ_AJZZ01000101.1	1	166	358	2.7e-131	0.99	193	AACe1	yes	no	no	yes	no	isepamicin, netilmicin, dibekacin, amikacin, tobramycin, sisomicin, kanamycin	amikacin
GCF_000281315	NZ_AKAB01000047.1	2	4618	4810	3.9999999999999995e-130	0.99	193	AACe1	yes	no	no	no	yes	isepamicin, netilmicin, dibekacin, amikacin, sisomicin, tobramycin, kanamycin	amikacin
GCF_000281595	NZ_AKAG01000105.1	2	153	345	2.7e-131	0.99	193	AACe1	yes	no	no	yes	no	sisomicin, isepamicin, tobramycin, amikacin, kanamycin, dibekacin, netilmicin	amikacin
GCF_000281615	NZ_AKAJ01000128.1	3	151	343	3.1e-131	0.99	193	AACe1	yes	no	no	yes	no	isepamicin, netilmicin, dibekacin, sisomicin, amikacin, tobramycin, kanamycin	amikacin
GCF_000281515	NZ_AKAM01000064.1	1	4615	4807	5.7000000000000006e-130	0.99	193	AACe1	yes	no	no	no	yes	amikacin, netilmicin, sisomicin, isepamicin, dibekacin, tobramycin, kanamycin	amikacin
GCF_000281635	NZ_AKAN01000228.1	3	124	316	4.5e-131	0.99	193	AACe1	yes	no	no	yes	no	tobramycin, isepamicin, sisomicin, amikacin, dibekacin, kanamycin, netilmicin	amikacin
GCF_000276765	NZ_AKAW01000043.1	-2	57	342	3e-184	1.0	286	AACh	no	no	no	no	no	tobramycin, dibekacin, netilmicin, sisomicin, gentamicin	gentamicin
GCF_000276865	NZ_AKAX01000395.1	2	17	193	6.4e-126	0.99	177	ANTd	yes	no	no	no	no	tobramycin, gentamicin, sisomicin, kanamycin, dibekacin	kanamycin, gentamicin
GCF_000278465	NZ_AKFW01000002.1	3	165517	165660	7.4e-67	0.99	144	AACf1	no	no	no	no	no
GCF_000278485	NZ_AKFX01000002.1	-1	165518	165661	6.5e-67	0.99	144	AACf1	no	no	no	no	no
GCF_000278505	NZ_AKFY01000002.1	-1	30745	30888	6.3e-67	0.99	144	AACf1	no	no	no	no	no
GCF_000278525	NZ_AKFZ01000001.1	-2	170985	171128	1.2e-66	0.99	144	AACf1	no	no	no	no	no
GCF_000278545	NZ_AKGA01000001.1	-3	154728	154871	7.100000000000001e-67	0.99	144	AACf1	no	no	no	no	no
GCF_000269685	NZ_AKGC01000026.1	-1	155	332	6.7e-111	0.99	178	AACg	yes	no	no	no	no	kanamycin, amikacin, isepamicin, sisomicin, dibekacin, tobramycin, netilmicin
GCF_000269685	NZ_AKGC01000028.1	-2	68	320	3.8e-184	1.0	253	ANTb	no	no	no	no	no	tobramycin, kanamycin, amikacin, dibekacin, isepamicin, neomycin
GCF_000276445	NZ_AKGN01000021.1	-3	4530	4782	3.8e-183	1.0	253	ANTb	no	no	no	no	yes	isepamicin, neomycin, tobramycin, amikacin, dibekacin, kanamycin
GCF_000276425	NZ_AKGO01000095.1	1	470	722	5e-184	1.0	253	ANTb	no	no	no	no	yes	neomycin, tobramycin, kanamycin, amikacin, isepamicin, dibekacin
GCF_000276405	NZ_AKGP01000121.1	-3	466	718	5.5e-184	1.0	253	ANTb	no	no	no	no	yes	tobramycin, dibekacin, kanamycin, neomycin, isepamicin, amikacin
GCF_000276345	NZ_AKGS01000061.1	-2	244	496	7.2e-183	1.0	253	ANTb	yes	no	no	no	yes	kanamycin, neomycin, dibekacin, isepamicin, amikacin, tobramycin
GCF_000276165	NZ_AKHB01000010.1	1	89	341	2.9e-183	1.0	253	ANTb	no	no	yes	no	no	amikacin, tobramycin, isepamicin, kanamycin, neomycin, dibekacin
GCF_000276125	NZ_AKHD01000061.1	-3	202	454	8.7e-184	1.0	253	ANTb	yes	no	no	no	yes	tobramycin, kanamycin, isepamicin, amikacin, dibekacin, neomycin
GCF_000276125	NZ_AKHD01000066.1	-3	293	470	1.8e-110	0.99	178	AACg	yes	no	no	no	yes	tobramycin, sisomicin, amikacin, netilmicin, isepamicin, kanamycin, dibekacin
GCF_000276105	NZ_AKHE01000164.1	2	303	480	4.4000000000000005e-110	0.99	178	AACg	yes	no	no	no	yes	sisomicin, kanamycin, amikacin, dibekacin, netilmicin, isepamicin, tobramycin
GCF_000276105	NZ_AKHE01000165.1	-1	201	453	5.6e-184	1.0	253	ANTb	no	no	no	no	no	isepamicin, kanamycin, neomycin, amikacin, dibekacin, tobramycin
GCF_000276085	NZ_AKHF01000054.1	-1	271	448	1.4e-110	0.99	178	AACg	yes	no	no	no	no	dibekacin, netilmicin, sisomicin, kanamycin, amikacin, isepamicin, tobramycin
GCF_000276085	NZ_AKHF01000117.1	2	182	434	1.5999999999999999e-183	1.0	253	ANTb	yes	no	no	no	yes	isepamicin, tobramycin, amikacin, kanamycin, neomycin, dibekacin
GCF_000276065	NZ_AKHG01000039.1	3	285	462	1.6e-110	0.99	178	AACg	yes	no	no	no	yes	tobramycin, sisomicin, amikacin, kanamycin, isepamicin, netilmicin, dibekacin	amikacin
GCF_000276045	NZ_AKHH01000047.1	3	494	671	3e-110	0.99	178	AACg	yes	no	no	no	yes	tobramycin, isepamicin, amikacin, sisomicin, netilmicin, kanamycin, dibekacin	amikacin
GCF_000275985	NZ_AKHK01000054.1	1	246	423	1.2e-110	0.99	178	AACg	yes	no	no	no	yes	sisomicin, netilmicin, tobramycin, isepamicin, kanamycin, dibekacin, amikacin	amikacin
GCF_000275965	NZ_AKHL01000018.1	3	274	451	2.1e-110	0.99	178	AACg	yes	no	no	no	yes	kanamycin, tobramycin, amikacin, isepamicin, sisomicin, dibekacin, netilmicin	amikacin
GCF_000282855	NZ_AKIC01000118.1	2	8910	9053	8e-67	0.99	144	AACf1	no	no	no	no	no
GCF_000282075	NZ_AKIX01000050.1	1	20455	20708	8.4e-80	0.99	254	ANTb	no	no	no	no	no	kanamycin, isepamicin, amikacin, dibekacin, neomycin, tobramycin
GCF_000282075	NZ_AKIX01000119.1	3	4467	4638	1.8999999999999998e-47	0.95	172	AACg	no	no	no	no	no	isepamicin, amikacin, dibekacin, netilmicin, tobramycin, kanamycin, sisomicin
GCF_000282535	NZ_AKJC01000157.1	3	4369	4607	4.6e-76	0.95	239	APHf	no	no	no	no	no
GCF_000282535	NZ_AKJC01000306.1	3	3802	3945	2.7e-56	0.97	144	AACf1	no	no	no	no	no
GCF_000282435	NZ_AKJH01000163.1	-3	7387	7530	3.3e-54	0.97	144	AACf1	no	no	no	no	no	kanamycin, sisomicin, netilmicin, isepamicin, amikacin, tobramycin, dibekacin
GCF_000282415	NZ_AKJI01000109.1	3	7627	7770	1.5e-54	0.97	144	AACf1	no	no	no	no	no	sisomicin, isepamicin, dibekacin, amikacin, tobramycin, netilmicin, kanamycin
GCF_000282275	NZ_AKJP02000010.1	-3	2008	2266	5e-73	0.95	259	APHf	no	no	no	no	no	streptomycin
GCF_000282175	NZ_AKJU01000106.1	-1	801	944	2.4999999999999997e-55	0.98	144	AACf1	no	no	no	no	no
GCF_000282015	NZ_AKKB01000097.1	2	3521	3774	2.1e-77	0.98	254	ANTb	no	no	no	no	no	tobramycin, dibekacin, amikacin, kanamycin, neomycin, isepamicin
GCF_000281955	NZ_AKKF01000164.1	3	2005	2261	6.599999999999999e-90	0.95	257	APHf	no	no	no	no	no	streptomycin
GCF_000271125	NZ_AKTU01000008.1	2	464884	465058	1.9e-69	0.97	175	AACc	no	no	no	no	no	netilmicin, sisomicin, tobramycin, dibekacin, neomycin
GCF_000271245	NZ_AKTV01000006.1	1	823064	823238	2.2999999999999998e-69	0.97	175	AACc	no	no	no	no	no	tobramycin, neomycin, sisomicin, netilmicin, dibekacin
GCF_000271265	NZ_AKTW01000005.1	2	464720	464894	1.7999999999999998e-69	0.97	175	AACc	no	no	no	no	no	neomycin, tobramycin, netilmicin, dibekacin, sisomicin
GCF_000271205	NZ_AKTX01000007.1	3	692255	692429	7.3e-70	0.97	175	AACc	no	no	no	no	no	neomycin, sisomicin, dibekacin, netilmicin, tobramycin
GCF_000271225	NZ_AKTY01000006.1	1	552867	553041	5.0999999999999996e-70	0.97	175	AACc	no	no	no	no	no	dibekacin, sisomicin, tobramycin, neomycin, netilmicin
GCF_000271065	NZ_AKTZ01000012.1	2	429198	429372	6.499999999999999e-70	0.97	175	AACc	no	no	no	no	no	dibekacin, netilmicin, tobramycin, sisomicin, neomycin
GCF_000271085	NZ_AKUA01000006.1	2	466195	466369	5e-70	0.97	175	AACc	no	no	no	no	no	tobramycin, dibekacin, neomycin, sisomicin, netilmicin
GCF_000271005	NZ_AKUB01000007.1	3	455814	455988	1.0999999999999999e-69	0.97	175	AACc	no	no	no	no	no	dibekacin, tobramycin, neomycin, sisomicin, netilmicin
GCF_000271025	NZ_AKUC01000007.1	2	566611	566785	7e-70	0.97	175	AACc	no	no	no	no	no	netilmicin, dibekacin, tobramycin, sisomicin, neomycin
GCF_000271045	NZ_AKUD01000004.1	1	844732	844906	5.8e-70	0.97	175	AACc	no	no	no	no	no	sisomicin, neomycin, dibekacin, tobramycin, netilmicin
GCF_000270985	NZ_AKUE01000005.1	3	664979	665153	2.2999999999999998e-69	0.97	175	AACc	no	no	no	no	no	neomycin, netilmicin, sisomicin, tobramycin, dibekacin
GCF_000270865	NZ_AKUF01000008.1	2	439503	439677	1.9e-69	0.97	175	AACc	no	no	no	no	no	sisomicin, dibekacin, tobramycin, netilmicin, neomycin
GCF_000271185	NZ_AKUG01000006.1	1	439501	439675	1.6e-69	0.97	175	AACc	no	no	no	no	no	netilmicin, tobramycin, sisomicin, dibekacin, neomycin
GCF_000271145	NZ_AKUH01000016.1	1	102896	103070	2e-69	0.97	175	AACc	no	no	no	no	no	neomycin, netilmicin, dibekacin, tobramycin, sisomicin
GCF_000271165	NZ_AKUI01000004.1	2	15830	16004	2.9000000000000003e-71	0.97	175	AACc	no	no	no	no	no	neomycin, tobramycin, dibekacin, sisomicin, netilmicin
GCF_000271285	NZ_AKUJ01000002.1	1	1275447	1275621	2.3e-70	0.97	175	AACc	no	no	no	no	no	sisomicin, neomycin, tobramycin, netilmicin, dibekacin
GCF_000270885	NZ_AKUK01000013.1	1	32819	32993	3.8e-70	0.97	175	AACc	no	no	no	no	no	dibekacin, neomycin, sisomicin, netilmicin, tobramycin
GCF_000308015	NZ_AKUL01000004.1	3	762846	763020	3.3e-70	0.97	175	AACc	no	no	no	no	no	neomycin, tobramycin, dibekacin, sisomicin, netilmicin
GCF_000270905	NZ_AKUM01000006.1	1	383137	383311	2.9e-70	0.97	175	AACc	no	no	no	no	no	sisomicin, dibekacin, tobramycin, neomycin, netilmicin
GCF_000270945	NZ_AKUN01000007.1	2	249849	250023	3.8999999999999995e-70	0.97	175	AACc	no	no	no	no	no	neomycin, dibekacin, sisomicin, netilmicin, tobramycin
GCF_000270925	NZ_AKUO01000009.1	1	421149	421323	4.6e-70	0.97	175	AACc	no	no	no	no	no	netilmicin, neomycin, sisomicin, dibekacin, tobramycin
GCF_000271105	NZ_AKUP01000020.1	3	217880	218054	3.2999999999999995e-69	0.97	175	AACc	no	no	no	no	no	dibekacin, neomycin, sisomicin, netilmicin, tobramycin
GCF_000270965	NZ_AKUQ01000011.1	2	356155	356329	4.4999999999999996e-70	0.97	175	AACc	no	no	no	no	no	neomycin, tobramycin, dibekacin, netilmicin, sisomicin
GCF_000270645	NZ_AKUR01000012.1	1	438770	438944	3.1e-69	0.97	175	AACc	no	no	no	no	no	tobramycin, netilmicin, dibekacin, sisomicin, neomycin
GCF_000270605	NZ_AKUS01000008.1	1	529521	529695	2.2999999999999998e-69	0.97	175	AACc	no	no	no	no	no	dibekacin, netilmicin, sisomicin, neomycin, tobramycin
GCF_000270745	NZ_AKUT01000010.1	2	953087	953261	4.2e-69	0.97	175	AACc	no	no	no	no	no	sisomicin, netilmicin, neomycin, dibekacin, tobramycin
GCF_000270765	NZ_AKUU01000008.1	2	421175	421349	6.4e-70	0.97	175	AACc	no	no	no	no	no	dibekacin, sisomicin, neomycin, netilmicin, tobramycin
GCF_000270805	NZ_AKUV01000009.1	3	383089	383263	3.5e-70	0.97	175	AACc	no	no	no	no	no	neomycin, sisomicin, netilmicin, dibekacin, tobramycin
GCF_000270785	NZ_AKUW01000012.1	3	383123	383297	5.899999999999999e-70	0.97	175	AACc	no	no	no	no	no	netilmicin, dibekacin, neomycin, sisomicin, tobramycin
GCF_000270825	NZ_AKUX01000012.1	2	235986	236160	2.1999999999999998e-69	0.97	175	AACc	no	no	no	no	no	dibekacin, neomycin, netilmicin, sisomicin, tobramycin
GCF_000270845	NZ_AKUY01000032.1	2	229589	229763	3.3999999999999996e-69	0.97	175	AACc	no	no	no	no	no	sisomicin, tobramycin, dibekacin, netilmicin, neomycin
GCF_000270585	NZ_AKUZ01000017.1	3	235971	236145	3.3999999999999996e-69	0.97	175	AACc	no	no	no	no	no	neomycin, sisomicin, tobramycin, netilmicin, dibekacin
GCF_000270705	NZ_AKVA01000011.1	1	220312	220486	2e-69	0.97	175	AACc	no	no	no	no	no	neomycin, tobramycin, netilmicin, sisomicin, dibekacin
GCF_000270565	NZ_AKVB01000011.1	2	215854	216028	2.1e-69	0.97	175	AACc	no	no	no	no	no	neomycin, sisomicin, netilmicin, tobramycin, dibekacin
GCF_000270725	NZ_AKVC01000010.1	3	215828	216002	2e-69	0.97	175	AACc	no	no	no	no	no	neomycin, sisomicin, tobramycin, netilmicin, dibekacin
GCF_000270685	NZ_AKVD01000006.1	2	465067	465241	1.1999999999999998e-69	0.97	175	AACc	no	no	no	no	no	dibekacin, tobramycin, sisomicin, netilmicin, neomycin
GCF_000270625	NZ_AKVE01000007.1	2	465068	465242	2.3999999999999996e-69	0.97	175	AACc	no	no	no	no	no	dibekacin, neomycin, sisomicin, netilmicin, tobramycin
GCF_000270665	NZ_AKVF01000005.1	1	686864	687038	4e-70	0.97	175	AACc	no	no	no	no	no	dibekacin, neomycin, sisomicin, netilmicin, tobramycin
GCF_000299315	NZ_AKVP01000012.1	1	20346	20613	2.6e-100	0.96	268	APHb	no	no	no	no	no
GCF_000280595	NZ_AKVR01000009.1	1	22036	22210	3.2999999999999995e-69	0.97	175	AACc	no	no	no	no	no	neomycin, tobramycin, dibekacin, netilmicin, sisomicin
GCF_000280615	NZ_AKVT01000018.1	-2	13663	13837	1.6e-69	0.97	175	AACc	no	no	no	no	no	dibekacin, tobramycin, sisomicin, neomycin, netilmicin
GCF_000280635	NZ_AKVU01000001.1	2	13623	13797	5.999999999999999e-70	0.97	175	AACc	no	no	no	no	no	netilmicin, tobramycin, neomycin, dibekacin, sisomicin
GCF_000601395	NZ_AKYN01000060.1	1	8888	9031	2.3e-67	0.99	144	AACf1	no	no	no	no	no
GCF_000601395	NZ_AKYN01000099.1	3	1052	1332	3.1000000000000002e-124	0.99	281	AACb	yes	no	no	yes	no
GCF_000700785	NZ_AKYO01000066.1	1	127936	128079	1.8e-66	0.99	144	AACf1	no	no	no	no	no
GCF_000463175	NZ_AKYQ01000116.1	1	6726	6906	3.5e-104	0.99	181	AACc	no	no	no	no	no	sisomicin, dibekacin, neomycin, netilmicin, tobramycin
GCF_000523395	NZ_AKYX01000168.1	-3	35	211	2.5e-126	0.99	177	ANTd	yes	no	no	yes	no	sisomicin, tobramycin, dibekacin, gentamicin, kanamycin	gentamicin, kanamycin
GCF_000297315	NZ_AKZF01000315.1	1	5058	5314	2e-80	0.95	257	APHf	no	no	no	no	no	streptomycin
GCF_000297335	NZ_AKZG01000097.1	3	5841	6097	5.7e-81	0.95	257	APHf	no	no	no	no	no	streptomycin
GCF_000282875	NZ_AKZO01000030.1	-1	23442	23585	1.1e-66	0.99	144	AACf1	no	no	no	no	no
GCF_000287475	NZ_AKZR01000156.1	-1	1493	1571	7.799999999999999e-39	0.98	79	AACi	no	no	no	no	no	amikacin, tobramycin, sisomicin, dibekacin, netilmicin	gentamicin
GCF_000278645	NZ_ALAL01000012.1	3	2142	2321	4.6000000000000004e-123	1.0	180	AACj	no	no	no	no	no	dibekacin, neomycin, netilmicin, sisomicin, tobramycin
GCF_000508325	NZ_ALAN01000015.1	2	20609	20781	3.6e-49	0.96	173	AACg	no	no	no	no	no	netilmicin, tobramycin, isepamicin, kanamycin, dibekacin, amikacin, sisomicin
GCF_000508325	NZ_ALAN01000073.1	3	339	618	5.4e-74	0.96	280	ANTa	no	no	no	no	no	streptomycin
GCF_002081505	NZ_ALBR01000029.1	2	1373	1546	1.6e-50	0.97	174	AACg	no	no	no	no	no	netilmicin, sisomicin, kanamycin, isepamicin, amikacin, tobramycin, dibekacin
GCF_000294755	NZ_ALEF01000025.1	3	24629	24767	1.7e-48	0.95	139	AACf1	no	no	no	no	no	kanamycin, tobramycin, netilmicin, isepamicin, dibekacin, sisomicin, amikacin
GCF_000280075	NZ_ALEI01000031.1	-1	81115	81258	1.6e-66	0.99	144	AACf1	no	no	no	no	no
GCF_000280095	NZ_ALEJ01000038.1	1	6326	6469	3.1e-67	0.99	144	AACf1	no	no	no	no	no
GCF_000280115	NZ_ALEK01000025.1	-3	56956	57099	1.4e-66	0.99	144	AACf1	no	no	no	no	no
GCF_000280135	NZ_ALEL01000014.1	-2	56976	57119	4.8e-67	0.99	144	AACf1	no	no	no	no	no
GCF_000280155	NZ_ALEM01000029.1	-2	162549	162692	1.1e-66	0.99	144	AACf1	no	no	no	no	no
GCF_000280175	NZ_ALEN01000020.1	-3	162522	162665	8.6e-67	0.99	144	AACf1	no	no	no	no	no
GCF_000280195	NZ_ALEO01000036.1	-2	56960	57103	9.7e-67	0.99	144	AACf1	no	no	no	no	no
GCF_000280215	NZ_ALEP01000021.1	1	162492	162635	9.100000000000001e-67	0.99	144	AACf1	no	no	no	no	no
GCF_000280235	NZ_ALEQ01000015.1	3	56971	57114	7.3e-67	0.99	144	AACf1	no	no	no	no	no
GCF_000280255	NZ_ALER01000037.1	-3	56937	57080	5.6e-67	0.99	144	AACf1	no	no	no	no	no
GCF_000280275	NZ_ALES01000028.1	-2	162528	162671	1.1e-66	0.99	144	AACf1	no	no	no	no	no
GCF_000280295	NZ_ALET01000007.1	1	34011	34154	3.7e-67	0.99	144	AACf1	no	no	no	no	no
GCF_000280335	NZ_ALEV01000012.1	-2	56982	57125	4.2e-67	0.99	144	AACf1	no	no	no	no	no
GCF_000280355	NZ_ALEW01000021.1	-1	258145	258288	2.1e-66	0.99	144	AACf1	no	no	no	no	no
GCF_000280375	NZ_ALEX01000020.1	1	162534	162677	8.6e-67	0.99	144	AACf1	no	no	no	no	no
GCF_000280395	NZ_ALEY01000012.1	-2	9451	9594	2.6000000000000002e-67	0.99	144	AACf1	no	no	no	no	no
GCF_000280415	NZ_ALEZ01000028.1	1	33758	33901	4.5e-67	0.99	144	AACf1	no	no	no	no	no
GCF_000280455	NZ_ALFB01000025.1	2	162572	162715	9.9e-67	0.99	144	AACf1	no	no	no	no	no
GCF_000280475	NZ_ALFC01000034.1	-2	56346	56489	4.9e-67	0.99	144	AACf1	no	no	no	no	no
GCF_000328985	NZ_ALFD01000338.1	2	576	719	3.6999999999999996e-68	0.99	144	AACf1	no	no	no	no	no
GCF_000329025	NZ_ALFF01000016.1	-1	20554	20697	2.6000000000000002e-67	0.99	144	AACf1	no	no	no	no	no
GCF_000329045	NZ_ALFG01000021.1	-2	258115	258258	1.3e-66	0.99	144	AACf1	no	no	no	no	no
GCF_000329065	NZ_ALFH01000028.1	2	251583	251726	2.6e-66	0.99	144	AACf1	no	no	no	no	no
GCF_000329085	NZ_ALFI01000028.1	2	258060	258203	1.6e-66	0.99	144	AACf1	no	no	no	no	no
GCF_000329105	NZ_ALFJ01000022.1	2	56951	57094	1.3e-66	0.99	144	AACf1	no	no	no	no	no
GCF_000329125	NZ_ALFK01000019.1	1	162555	162698	1.6e-66	0.99	144	AACf1	no	no	no	no	no
GCF_000329145	NZ_ALFL01000019.1	3	258142	258285	1.9000000000000001e-66	0.99	144	AACf1	no	no	no	no	no
GCF_000329165	NZ_ALFM01000013.1	-3	8751	8894	2.5000000000000003e-67	0.99	144	AACf1	no	no	no	no	no
GCF_000329185	NZ_ALFN01000043.1	3	56988	57131	6.700000000000001e-67	0.99	144	AACf1	no	no	no	no	no
GCF_000329205	NZ_ALFO01000021.1	-3	162531	162674	1.5e-66	0.99	144	AACf1	no	no	no	no	no
GCF_000329225	NZ_ALFP01000018.1	1	162619	162762	1.5e-66	0.99	144	AACf1	no	no	no	no	no
GCF_000329245	NZ_ALFQ01000034.1	2	26914	27057	8.8e-67	0.99	144	AACf1	no	no	no	no	no
GCF_000329265	NZ_ALFR01000018.1	-3	258151	258294	1.8e-66	0.99	144	AACf1	no	no	no	no	no
GCF_000329285	NZ_ALFS01000040.1	-2	162463	162606	9.300000000000001e-67	0.99	144	AACf1	no	no	no	no	no
GCF_000329305	NZ_ALFT01000021.1	3	258084	258227	1.3e-66	0.99	144	AACf1	no	no	no	no	no
GCF_000329325	NZ_ALFU01000016.1	-1	258185	258328	1.4e-66	0.99	144	AACf1	no	no	no	no	no
GCF_000329345	NZ_ALFV01000024.1	-3	162543	162686	1.9000000000000001e-66	0.99	144	AACf1	no	no	no	no	no
GCF_000329385	NZ_ALFX01000025.1	-3	258156	258299	1.5e-66	0.99	144	AACf1	no	no	no	no	no
GCF_000329405	NZ_ALFY01000023.1	1	162457	162600	1.3e-66	0.99	144	AACf1	no	no	no	no	no
GCF_000329425	NZ_ALFZ01000035.1	-3	97190	97333	9.9e-67	0.99	144	AACf1	no	no	no	no	no
GCF_000329445	NZ_ALGA01000051.1	1	9246	9389	1.6e-67	0.99	144	AACf1	no	no	no	no	no
GCF_000329465	NZ_ALGB01000035.1	-2	97164	97307	9.7e-67	0.99	144	AACf1	no	no	no	no	no
GCF_000329485	NZ_ALGC01000053.1	2	97232	97375	8.200000000000001e-67	0.99	144	AACf1	no	no	no	no	no
GCF_000329505	NZ_ALGD01000036.1	1	57007	57150	4.3e-67	0.99	144	AACf1	no	no	no	no	no
GCF_000329525	NZ_ALGE01000013.1	1	32784	32927	3.8e-67	0.99	144	AACf1	no	no	no	no	no
GCF_000329545	NZ_ALGF01000048.1	2	165714	165857	9.500000000000001e-67	0.99	144	AACf1	no	no	no	no	no
GCF_000329565	NZ_ALGG01000021.1	-2	258146	258289	1.9000000000000001e-66	0.99	144	AACf1	no	no	no	no	no
GCF_000329585	NZ_ALGH01000049.1	1	162404	162547	1.2e-66	0.99	144	AACf1	no	no	no	no	no
GCF_000329605	NZ_ALGI01000021.1	-3	163328	163471	1.5e-66	0.99	144	AACf1	no	no	no	no	no
GCF_000329625	NZ_ALGJ01000035.1	2	56967	57110	5.2000000000000004e-67	0.99	144	AACf1	no	no	no	no	no
GCF_000329645	NZ_ALGK01000009.1	-2	5131	5274	3.5e-67	0.99	144	AACf1	no	no	no	no	no
GCF_000329665	NZ_ALGL01000047.1	2	56985	57128	5.9e-67	0.99	144	AACf1	no	no	no	no	no
GCF_000329685	NZ_ALGM01000066.1	-1	16233	16376	3.4e-67	0.99	144	AACf1	no	no	no	no	no
GCF_000329705	NZ_ALGN01000033.1	-3	155565	155708	1.3e-66	0.99	144	AACf1	no	no	no	no	no
GCF_000329725	NZ_ALGO01000041.1	3	56956	57099	6.2e-67	0.99	144	AACf1	no	no	no	no	no
GCF_000329745	NZ_ALGP01000041.1	3	42894	43037	5.5e-67	0.99	144	AACf1	no	no	no	no	no
GCF_000329765	NZ_ALGQ01000015.1	2	9792	9935	4.1000000000000004e-67	0.99	144	AACf1	no	no	no	no	no
GCF_000329785	NZ_ALGR01000004.1	-2	4947	5090	1.4e-67	0.99	144	AACf1	no	no	no	no	no
GCF_000329805	NZ_ALGS01000014.1	2	4094	4237	4.2e-67	0.99	144	AACf1	no	no	no	no	no
GCF_000329825	NZ_ALGT01000048.1	-1	89959	90102	7.4e-67	0.99	144	AACf1	no	no	no	no	no
GCF_000329845	NZ_ALGU01000010.1	1	20899	21042	2.7e-67	0.99	144	AACf1	no	no	no	no	no
GCF_000329885	NZ_ALGW01000009.1	-3	42907	43050	4.7e-67	0.99	144	AACf1	no	no	no	no	no
GCF_000329905	NZ_ALGX01000019.1	-2	43056	43199	6.3e-67	0.99	144	AACf1	no	no	no	no	no
GCF_000329925	NZ_ALGY01000020.1	-2	42816	42959	5.4e-67	0.99	144	AACf1	no	no	no	no	no
GCF_000329945	NZ_ALGZ01000047.1	2	4525	4668	4e-67	0.99	144	AACf1	no	no	no	no	no
GCF_000329965	NZ_ALHA01000021.1	3	24494	24637	1.2e-66	0.99	144	AACf1	no	no	no	no	no
GCF_000329985	NZ_ALHB01000004.1	-2	8063	8206	1.3000000000000001e-67	0.99	144	AACf1	no	no	no	no	no
GCF_000330045	NZ_ALHE01000049.1	1	17843	17986	2e-67	0.99	144	AACf1	no	no	no	no	no
GCF_000330065	NZ_ALHF01000116.1	3	7543	7686	2e-67	0.99	144	AACf1	no	no	no	no	no
GCF_000330085	NZ_ALHG01000054.1	1	56952	57095	8.8e-67	0.99	144	AACf1	no	no	no	no	no
GCF_000330105	NZ_ALHH01000039.1	-1	33741	33884	5.2000000000000004e-67	0.99	144	AACf1	no	no	no	no	no
GCF_000330125	NZ_ALHI01000043.1	-2	4154	4297	9.1e-68	0.99	144	AACf1	no	no	no	no	no
GCF_000330145	NZ_ALHJ01000046.1	1	7460	7603	1.1e-67	0.99	144	AACf1	no	no	no	no	no
GCF_000330165	NZ_ALHK01000077.1	-3	5978	6121	1.3000000000000001e-67	0.99	144	AACf1	no	no	no	no	no
GCF_000330185	NZ_ALHL01000097.1	-1	8218	8361	5.3000000000000004e-67	0.99	144	AACf1	no	no	no	no	no
GCF_000330245	NZ_ALHO01000045.1	3	56975	57118	6.5e-67	0.99	144	AACf1	no	no	no	no	no
GCF_000330265	NZ_ALHP01000059.1	1	13093	13236	6.1e-67	0.99	144	AACf1	no	no	no	no	no
GCF_000330285	NZ_ALHQ01000158.1	-2	8556	8699	3.7e-67	0.99	144	AACf1	no	no	no	no	no
GCF_000330305	NZ_ALHR01000016.1	1	24143	24286	3.5e-67	0.99	144	AACf1	no	no	no	no	no
GCF_000330325	NZ_ALHS01000106.1	2	1196	1339	6.7999999999999995e-68	0.99	144	AACf1	no	no	no	no	no
GCF_000330345	NZ_ALHT01000020.1	2	13125	13268	4.2e-67	0.99	144	AACf1	no	no	no	no	no
GCF_000330385	NZ_ALHV01000001.1	-3	9573	9716	2.7e-67	0.99	144	AACf1	no	no	no	no	no
GCF_000330425	NZ_ALHX01000033.1	-3	6224	6367	7.399999999999999e-68	0.99	144	AACf1	no	no	no	no	no
GCF_000330445	NZ_ALHY01000181.1	-2	9689	9832	3.7999999999999996e-68	0.99	144	AACf1	no	no	no	no	no
GCF_000330525	NZ_ALHZ01000970.1	2	1353	1496	2.5000000000000003e-67	0.99	144	AACf1	no	no	no	no	no
GCF_000330465	NZ_ALIB01000104.1	-3	6794	6937	2e-67	0.99	144	AACf1	no	no	no	no	no
GCF_000330565	NZ_ALIC01000008.1	3	8505	8648	3.5e-67	0.99	144	AACf1	no	no	no	no	no
GCF_000330585	NZ_ALID01000034.1	3	42885	43028	1.5e-66	0.99	144	AACf1	no	no	no	no	no
GCF_000286535	NZ_ALII01000016.1	1	43165	43344	2.7e-123	1.0	180	AACj	no	no	no	no	no	dibekacin, netilmicin, sisomicin, neomycin, tobramycin
GCF_000283055	NZ_ALIO01000199.1	-1	2701	2957	8.1e-81	0.96	257	APHf	no	no	no	no	no	streptomycin
GCF_000283075	NZ_ALIP01000156.1	1	21729	21871	2e-48	0.97	143	AACf1	no	no	no	no	no
GCF_000283455	NZ_ALIS01000239.1	3	7	199	1.9e-131	0.99	193	AACe1	yes	no	no	no	no	tobramycin, dibekacin, netilmicin, amikacin, isepamicin, kanamycin, sisomicin	amikacin
GCF_000282975	NZ_ALJC01000059.1	2	4	180	1.3e-127	0.99	177	ANTd	yes	no	no	no	no	gentamicin, kanamycin, tobramycin, dibekacin, sisomicin	gentamicin, kanamycin
GCF_000440375	NZ_ALKX01000029.1	1	2723	2996	1.6000000000000002e-158	1.0	274	ANTa	no	no	no	no	yes	streptomycin	streptomycin
GCF_000440455	NZ_ALLB01000025.1	3	6627	6765	7.6e-37	0.96	139	AACf1	no	no	no	no	no
GCF_000440455	NZ_ALLB01000034.1	2	8089	8362	1.1e-157	1.0	274	ANTa	no	no	no	no	no
GCF_000440695	NZ_ALLN01000129.1	2	12708	12846	5.6e-37	0.96	139	AACf1	no	no	no	no	no
GCF_000440895	NZ_ALLX01000004.1	3	6479	6616	9.7e-37	0.95	138	AACf1	no	no	no	no	no
GCF_000440955	NZ_ALMA01000010.1	3	24465	24741	2.1999999999999998e-169	1.0	277	ANTa	no	no	no	no	no	streptomycin	streptomycin
GCF_000441035	NZ_ALME01000044.1	2	23949	24225	3.3e-176	1.0	277	ANTa	no	no	no	no	no	streptomycin	streptomycin
GCF_000441115	NZ_ALMI01000082.1	2	1213	1390	1.3000000000000001e-108	0.99	178	AACg	no	no	no	no	yes	kanamycin, dibekacin, amikacin, sisomicin, isepamicin, tobramycin, netilmicin	amikacin
GCF_000441115	NZ_ALMI01000082.1	3	746	1022	2.4999999999999998e-169	1.0	277	ANTa	no	no	no	no	no	streptomycin	streptomycin
GCF_000441275	NZ_ALMQ01000048.1	2	1213	1390	6.7e-108	0.99	178	AACg	no	no	no	no	yes	sisomicin, dibekacin, netilmicin, tobramycin, kanamycin, isepamicin, amikacin	amikacin
GCF_000441275	NZ_ALMQ01000048.1	3	746	1022	1e-169	1.0	277	ANTa	no	no	no	no	no	streptomycin	streptomycin
GCF_000441295	NZ_ALMR01000010.1	3	44770	44908	2.6000000000000002e-37	0.95	139	AACf1	no	no	no	no	no
GCF_000441315	NZ_ALMS01000082.1	2	687	963	4.6000000000000005e-170	1.0	277	ANTa	yes	no	no	no	no	streptomycin	streptomycin
GCF_000441375	NZ_ALMW01000005.1	2	5901	6174	7.2e-143	1.0	274	ANTa	no	no	no	no	no
GCF_000441375	NZ_ALMW01000007.1	2	44738	44876	2.2e-37	0.95	139	AACf1	no	no	no	no	no
GCF_000440095	NZ_ALMX01000098.1	1	4973	5110	3.5e-37	0.96	138	AACf1	no	no	no	no	no
GCF_000441415	NZ_ALNB01000005.1	2	10693	10831	3.3e-36	0.96	139	AACf1	no	no	no	no	no
GCF_000440175	NZ_ALNF01000010.1	3	17879	18017	1.2e-36	0.96	139	AACf1	no	no	no	no	no
GCF_000440175	NZ_ALNF01000017.1	1	10412	10589	8.8e-109	0.99	178	AACg	no	no	no	no	no
GCF_000441475	NZ_ALNH01000025.1	2	12944	13081	6e-37	0.96	138	AACf1	no	no	no	no	no
GCF_000297635	NZ_ALNP01000013.1	3	57001	57282	6.5000000000000005e-111	0.96	282	APHb	no	no	no	no	no
GCF_000297635	NZ_ALNP01000035.1	2	10272	10449	1.3000000000000002e-60	0.96	178	AACc	no	no	no	no	no
GCF_000292545	NZ_ALOH01000143.1	1	27	312	2.8e-185	1.0	286	AACh	yes	no	no	no	yes	tobramycin, gentamicin, sisomicin, dibekacin, netilmicin	gentamicin
GCF_000292365	NZ_ALOV01000006.1	2	29559	29702	8.3e-60	0.98	144	AACf1	no	no	no	no	no
GCF_000292385	NZ_ALOW01000024.1	3	69	248	1.5e-108	1.0	180	AACj	no	no	no	no	no	neomycin, netilmicin, sisomicin, dibekacin, tobramycin
GCF_000293075	NZ_ALPN01000003.1	3	41624	41767	1.6e-67	0.99	144	AACf1	no	no	no	no	no
GCF_000293055	NZ_ALPO01000017.1	1	21263	21406	3.3e-68	0.99	144	AACf1	no	no	no	no	no
GCF_000293095	NZ_ALPP01000005.1	-3	45381	45524	8.499999999999999e-68	0.99	144	AACf1	no	no	no	no	no
GCF_000293115	NZ_ALPQ01000007.1	1	26599	26742	2.7e-67	0.99	144	AACf1	no	no	no	no	no
GCF_000290555	NZ_ALPS01000347.1	2	3282	3458	1.5000000000000002e-124	0.99	177	ANTd	yes	no	no	yes	no	tobramycin, kanamycin, gentamicin, dibekacin, sisomicin	kanamycin, gentamicin
GCF_000292245	NZ_ALPT02000059.1	1	6998	7171	1e-52	0.95	174	AACg	no	no	no	no	no	amikacin, tobramycin, isepamicin, dibekacin, sisomicin, kanamycin, netilmicin
GCF_000332855	NZ_ALPW01000005.1	1	61	240	1.2e-123	1.0	180	AACj	no	no	no	no	no	dibekacin, neomycin, sisomicin, tobramycin, netilmicin
GCF_000332855	NZ_ALPW01000130.1	1	56	216	1.1e-88	0.99	161	AACd	yes	no	no	no	no	kanamycin, amikacin, dibekacin, tobramycin, sisomicin, netilmicin, isepamicin
GCF_000287955	NZ_ALSB01000021.1	2	183568	183841	2.3e-142	1.0	274	ANTa	no	yes	no	no	no	streptomycin	streptomycin
GCF_000288475	NZ_ALUQ01000031.1	2	2443	2719	3.8999999999999997e-177	1.0	277	ANTa	yes	no	no	no	yes	streptomycin	streptomycin
GCF_000288515	NZ_ALUS01000001.1	3	2440	2716	4e-177	1.0	277	ANTa	yes	no	no	no	yes	streptomycin	streptomycin
GCF_000336335	NZ_ALWE01000033.1	2	156	333	8e-111	0.99	178	AACg	yes	no	no	no	no	tobramycin, kanamycin, sisomicin, isepamicin, amikacin, dibekacin, netilmicin	amikacin
GCF_000336275	NZ_ALWF01000042.1	3	155	332	6.7e-111	0.99	178	AACg	yes	no	no	no	no	kanamycin, dibekacin, sisomicin, isepamicin, amikacin, netilmicin, tobramycin	amikacin
GCF_000336295	NZ_ALWG01000032.1	2	156	333	5.5000000000000006e-111	0.99	178	AACg	yes	no	no	no	no	kanamycin, netilmicin, isepamicin, tobramycin, amikacin, sisomicin, dibekacin	amikacin
GCF_000336315	NZ_ALWH01000023.1	2	156	333	6.1e-111	0.99	178	AACg	yes	no	no	no	no	amikacin, sisomicin, netilmicin, tobramycin, dibekacin, kanamycin, isepamicin	amikacin
GCF_000293945	NZ_AMBV01000014.1	-2	61113	61256	7.3e-67	0.99	144	AACf1	no	no	no	no	no
GCF_000293965	NZ_AMBW01000043.1	2	53896	54039	5.9e-67	0.99	144	AACf1	no	no	no	no	no
GCF_000293925	NZ_AMBX01000058.1	1	127942	128085	1.4e-66	0.99	144	AACf1	no	no	no	no	no
GCF_000409585	NZ_AMCA01000265.1	2	8314	8592	7.7e-155	0.99	279	ANTa	no	no	no	no	no	streptomycin
GCF_000298255	NZ_AMCK01000014.1	3	4680	4822	1.5e-46	0.96	143	AACf1	no	no	no	no	no	dibekacin, kanamycin, tobramycin, netilmicin, amikacin, sisomicin, isepamicin
GCF_000305215	NZ_AMDE01000057.1	3	184	363	3.5e-129	1.0	180	AACj	no	no	no	no	no	sisomicin, tobramycin, dibekacin, netilmicin, neomycin
GCF_000305255	NZ_AMDQ01000042.1	1	6	182	4.8e-123	0.99	177	ANTd	yes	no	no	no	no	tobramycin, kanamycin, gentamicin, dibekacin, sisomicin	gentamicin, kanamycin
GCF_000305255	NZ_AMDQ01000119.1	2	1386	1561	5.6000000000000004e-101	0.99	176	AACa	yes	no	no	yes	yes	gentamicin, sisomicin, fortimicin	gentamicin
GCF_000305295	NZ_AMDR01000006.1	2	4893	5069	3.3e-123	0.99	177	ANTd	yes	no	no	yes	yes	gentamicin, sisomicin, tobramycin, kanamycin, dibekacin
GCF_000305295	NZ_AMDR01000054.1	3	67	246	2.1000000000000003e-123	1.0	180	AACj	no	no	no	no	no	netilmicin, tobramycin, neomycin, sisomicin, dibekacin
GCF_000312825	NZ_AMDX02000090.1	-2	44544	44687	4.1000000000000004e-67	0.99	144	AACf1	no	no	no	no	no
GCF_000314915	NZ_AMDY02000003.1	1	44402	44545	3.4e-67	0.99	144	AACf1	no	no	no	no	no
GCF_000312845	NZ_AMDZ02000007.1	1	44544	44687	3.3e-67	0.99	144	AACf1	no	no	no	no	no
GCF_000319795	NZ_AMEA02000002.1	1	44544	44687	2.5000000000000003e-67	0.99	144	AACf1	no	no	no	no	no
GCF_000312865	NZ_AMEB02000099.1	1	44544	44687	2.4e-67	0.99	144	AACf1	no	no	no	no	no
GCF_000312885	NZ_AMEC02000074.1	-1	44355	44498	3e-67	0.99	144	AACf1	no	no	no	no	no
GCF_000312745	NZ_AMED02000050.1	-1	44544	44687	2.9e-67	0.99	144	AACf1	no	no	no	no	no
GCF_000312905	NZ_AMEE02000073.1	1	44418	44561	3.7e-67	0.99	144	AACf1	no	no	no	no	no
GCF_000312765	NZ_AMEF02000069.1	1	44544	44687	2.5000000000000003e-67	0.99	144	AACf1	no	no	no	no	no
GCF_000312785	NZ_AMEG02000117.1	-1	44544	44687	8.900000000000001e-67	0.99	144	AACf1	no	no	no	no	no
GCF_000312805	NZ_AMEH02000070.1	2	3395	3538	2.9e-67	0.99	144	AACf1	no	no	no	no	no
GCF_000304655	NZ_AMEJ01000018.1	2	110	286	1.8e-125	0.99	177	ANTd	yes	no	no	yes	yes	tobramycin, gentamicin, sisomicin, kanamycin, dibekacin	gentamicin, kanamycin
GCF_000304655	NZ_AMEJ01000018.1	3	2374	2565	1.5999999999999998e-129	0.99	192	AACe1	yes	no	no	yes	yes	amikacin, tobramycin, kanamycin, sisomicin, netilmicin, dibekacin, isepamicin	amikacin
GCF_000305275	NZ_AMFL01000015.1	3	258	437	1.2000000000000001e-122	1.0	180	AACj	no	no	no	no	no	dibekacin, neomycin, netilmicin, sisomicin, tobramycin
GCF_000297235	NZ_AMFM01000063.1	-3	321	497	1.2e-125	0.99	177	ANTd	yes	no	no	yes	yes	kanamycin, gentamicin, sisomicin, tobramycin, dibekacin	kanamycin, gentamicin
GCF_000335575	NZ_AMFR01000020.1	3	312	491	8.5e-102	1.0	180	AACj	no	no	no	no	no	netilmicin, neomycin, tobramycin, dibekacin, sisomicin
GCF_000309135	NZ_AMFT01000037.1	3	584	763	7.6e-124	1.0	180	AACj	no	no	no	no	no	dibekacin, sisomicin, netilmicin, tobramycin, neomycin
GCF_000309115	NZ_AMFV01000045.1	2	764	940	3.9000000000000004e-123	0.99	177	ANTd	yes	no	no	yes	no	kanamycin, gentamicin, tobramycin, sisomicin, dibekacin	kanamycin, gentamicin
GCF_000335655	NZ_AMFX01000002.1	2	1847	2026	1.4e-125	1.0	180	AACj	no	no	no	no	no	netilmicin, neomycin, tobramycin, dibekacin, sisomicin
GCF_000309155	NZ_AMFY01000044.1	1	1887	2066	1.1e-122	1.0	180	AACj	no	no	no	no	no	dibekacin, tobramycin, neomycin, sisomicin, netilmicin
GCF_000335675	NZ_AMFZ01000100.1	3	910	1085	2.1e-101	0.99	176	AACa	yes	no	no	yes	no	fortimicin, sisomicin, gentamicin	gentamicin
GCF_000335595	NZ_AMGA01000016.1	1	1859	2038	3.4e-124	1.0	180	AACj	no	no	no	no	no	netilmicin, dibekacin, sisomicin, tobramycin, neomycin
GCF_000297515	NZ_AMGE01000062.1	1	1386	1561	1.7e-101	0.99	176	AACa	no	no	no	yes	no	sisomicin, gentamicin, fortimicin	gentamicin
GCF_000297595	NZ_AMGH01000032.1	1	432	608	6.8e-126	0.99	177	ANTd	yes	no	no	yes	yes	tobramycin, sisomicin, dibekacin, gentamicin, kanamycin	kanamycin, gentamicin
GCF_000297595	NZ_AMGH01000044.1	3	366	557	1.9999999999999998e-130	0.99	192	AACe1	yes	no	no	yes	no	isepamicin, tobramycin, dibekacin, amikacin, netilmicin, kanamycin, sisomicin	amikacin
GCF_000299655	NZ_AMGR01000006.1	3	58	237	9.1e-124	1.0	180	AACj	no	no	no	no	no	sisomicin, neomycin, dibekacin, tobramycin, netilmicin
GCF_000299655	NZ_AMGR01000023.1	3	1143	1335	4.6e-131	0.99	193	AACe1	yes	no	no	yes	no	netilmicin, sisomicin, kanamycin, tobramycin, dibekacin, amikacin, isepamicin
GCF_000299675	NZ_AMGS01000010.1	3	106	285	1.1e-123	1.0	180	AACj	no	no	no	no	no	neomycin, dibekacin, tobramycin, netilmicin, sisomicin
GCF_000299675	NZ_AMGS01000026.1	3	1143	1335	5.4e-131	0.99	193	AACe1	yes	no	no	yes	no	dibekacin, netilmicin, isepamicin, amikacin, sisomicin, kanamycin, tobramycin
GCF_000301175	NZ_AMHB01000138.1	1	1	174	3.4e-102	0.99	174	AACa	yes	no	no	no	no	fortimicin, gentamicin, sisomicin	gentamicin
GCF_000301195	NZ_AMHD01000206.1	2	50	229	1.7e-123	1.0	180	AACj	no	no	no	no	no	netilmicin, sisomicin, dibekacin, neomycin, tobramycin
GCF_000301215	NZ_AMHE01000003.1	2	59	238	1.9e-123	1.0	180	AACj	no	no	no	no	no	tobramycin, dibekacin, netilmicin, neomycin, sisomicin
GCF_000301235	NZ_AMHF01000058.1	3	53	232	7.9e-122	1.0	180	AACj	no	no	no	no	no	dibekacin, tobramycin, sisomicin, neomycin, netilmicin
GCF_000301875	NZ_AMHH01000258.1	3	59	238	4.2e-122	1.0	180	AACj	no	no	no	no	yes	netilmicin, neomycin, sisomicin, tobramycin, dibekacin
GCF_000301915	NZ_AMHK01000115.1	3	73	252	1.8e-119	1.0	180	AACj	no	no	no	no	no	sisomicin, dibekacin, netilmicin, tobramycin, neomycin
GCF_000301315	NZ_AMHL01000131.1	1	57	236	1.5000000000000002e-125	1.0	180	AACj	no	no	no	no	no	neomycin, sisomicin, dibekacin, tobramycin, netilmicin
GCF_000301935	NZ_AMHM01000040.1	1	123	302	1.7e-123	1.0	180	AACj	no	no	no	no	no	netilmicin, tobramycin, sisomicin, dibekacin, neomycin
GCF_000301955	NZ_AMHO01000082.1	1	57	236	2.4e-125	1.0	180	AACj	no	no	no	no	no	sisomicin, netilmicin, neomycin, dibekacin, tobramycin
GCF_000301955	NZ_AMHO01000193.1	3	316	491	1.4000000000000001e-101	0.99	176	AACa	yes	no	no	no	no	fortimicin, sisomicin, gentamicin
GCF_000301975	NZ_AMHQ01000102.1	3	19	195	9.4e-126	0.99	177	ANTd	yes	no	no	yes	no	kanamycin, sisomicin, dibekacin, gentamicin, tobramycin	gentamicin, kanamycin
GCF_000301995	NZ_AMHS01000048.1	2	50	229	6.500000000000001e-124	1.0	180	AACj	no	no	no	no	no	tobramycin, sisomicin, neomycin, netilmicin, dibekacin
GCF_000301995	NZ_AMHS01000066.1	3	372	532	2.5e-88	0.99	161	AACd	yes	no	no	yes	no	tobramycin, netilmicin, amikacin, dibekacin, kanamycin, isepamicin, sisomicin
GCF_000302015	NZ_AMHT01000156.1	2	59	238	5.3000000000000004e-123	1.0	180	AACj	no	no	no	no	no	dibekacin, netilmicin, neomycin, sisomicin, tobramycin
GCF_000302035	NZ_AMHW01000133.1	2	69	248	7.2e-122	1.0	180	AACj	no	no	no	no	no	sisomicin, dibekacin, netilmicin, neomycin, tobramycin
GCF_000302035	NZ_AMHW01000155.1	3	240	416	1.3000000000000001e-122	0.99	177	ANTd	no	no	no	no	no	dibekacin, gentamicin, sisomicin, kanamycin, tobramycin
GCF_000301415	NZ_AMHY01000046.1	3	1	166	4.2999999999999995e-115	1.0	166	ANTd	no	no	no	no	no	kanamycin, tobramycin, sisomicin, gentamicin, dibekacin	gentamicin, kanamycin
GCF_000301435	NZ_AMHZ01000057.1	2	69	248	3.9999999999999997e-122	1.0	180	AACj	no	no	no	no	no	tobramycin, neomycin, dibekacin, netilmicin, sisomicin
GCF_000302135	NZ_AMID01000009.1	3	47	226	1.2e-120	1.0	180	AACj	no	no	no	no	no	tobramycin, dibekacin, neomycin, sisomicin, netilmicin
GCF_000302155	NZ_AMIE01000074.1	2	1801	1977	2.7000000000000003e-125	0.99	177	ANTd	yes	no	no	yes	no	dibekacin, kanamycin, gentamicin, sisomicin, tobramycin	kanamycin, gentamicin
GCF_000301455	NZ_AMIF01000142.1	1	54	233	2.9e-125	1.0	180	AACj	no	no	no	no	no	netilmicin, tobramycin, dibekacin, neomycin, sisomicin
GCF_000301475	NZ_AMIG01000088.1	1	50	229	3.0000000000000004e-125	1.0	180	AACj	no	no	no	no	no	dibekacin, netilmicin, tobramycin, neomycin, sisomicin
GCF_000301495	NZ_AMIH01000619.1	3	12	204	3.6e-132	0.99	193	AACe1	yes	no	no	no	no	isepamicin, netilmicin, sisomicin, dibekacin, tobramycin, kanamycin, amikacin	amikacin
GCF_000302175	NZ_AMIL01000244.1	2	582	758	3.0000000000000004e-125	0.99	177	ANTd	yes	no	no	yes	no	dibekacin, sisomicin, tobramycin, gentamicin, kanamycin	kanamycin, gentamicin
GCF_000301575	NZ_AMIM01000068.1	2	332	524	1.8e-130	0.99	193	AACe1	yes	no	no	yes	no	netilmicin, isepamicin, sisomicin, amikacin, dibekacin, tobramycin, kanamycin	amikacin
GCF_000302195	NZ_AMIO01000076.1	3	337	529	1.9999999999999998e-130	0.99	193	AACe1	yes	no	no	yes	no	tobramycin, amikacin, isepamicin, netilmicin, sisomicin, kanamycin, dibekacin	amikacin
GCF_000301615	NZ_AMIP01000081.1	1	339	531	2.8e-130	0.99	193	AACe1	yes	no	no	yes	no	netilmicin, amikacin, kanamycin, dibekacin, sisomicin, tobramycin, isepamicin	amikacin
GCF_000302215	NZ_AMIQ01000069.1	2	65	244	1.3000000000000001e-123	1.0	180	AACj	no	no	no	no	no	dibekacin, netilmicin, tobramycin, sisomicin, neomycin
GCF_000302235	NZ_AMIR01000018.1	2	62	242	8.4e-122	0.99	181	AACj	no	no	no	no	no	dibekacin, neomycin, netilmicin, tobramycin, sisomicin
GCF_000302255	NZ_AMIS01000148.1	3	396	572	5.6000000000000005e-123	0.99	177	ANTd	yes	no	no	yes	no	dibekacin, gentamicin, kanamycin, tobramycin, sisomicin	kanamycin, gentamicin
GCF_000301655	NZ_AMIU01000030.1	1	50	229	1.1000000000000001e-125	1.0	180	AACj	no	no	no	no	no	tobramycin, dibekacin, neomycin, netilmicin, sisomicin
GCF_000301675	NZ_AMIY01000005.1	1	36	215	8.3e-97	1.0	180	AACj	no	no	no	no	no	neomycin, tobramycin, dibekacin, netilmicin, sisomicin
GCF_000301695	NZ_AMIZ01000041.1	1	48	227	5.4e-107	1.0	180	AACj	no	no	no	no	no	tobramycin, netilmicin, dibekacin, neomycin, sisomicin
GCF_000302315	NZ_AMJA01000094.1	3	5723	5865	4.4e-68	0.98	143	AACf1	no	no	no	no	no
GCF_000309035	NZ_AMJB01000211.1	1	6430	6572	1.5e-67	0.99	143	AACf1	no	no	no	no	no
GCF_000302415	NZ_AMJM01000097.1	2	9910	10054	8.6e-72	0.99	145	AACf1	no	no	no	no	no
GCF_000301275	NZ_AMJO01000180.1	2	59	238	2.1000000000000003e-123	1.0	180	AACj	no	no	no	no	no	netilmicin, neomycin, tobramycin, dibekacin, sisomicin
GCF_000961995	NZ_AMLQ01000015.1	-2	6920	7063	4.5e-67	0.99	144	AACf1	no	no	no	no	no
GCF_000603285	NZ_AMLR01000023.1	2	95578	95721	1.4e-66	0.99	144	AACf1	no	no	no	no	no
GCF_000603285	NZ_AMLR01000031.1	3	417	682	4e-188	1.0	266	APHf	yes	no	no	no	no
GCF_000962005	NZ_AMLS01000228.1	2	73	216	6.7999999999999995e-68	0.99	144	AACf1	no	no	no	no	no
GCF_000603305	NZ_AMLU01000012.1	1	62902	63045	1.0000000000000001e-66	0.99	144	AACf1	no	no	no	no	no
GCF_000603325	NZ_AMLV01000023.1	1	75158	75301	8.8e-67	0.99	144	AACf1	no	no	no	no	no
GCF_000962015	NZ_AMLW01000098.1	-1	8205	8348	3.7e-67	0.99	144	AACf1	no	no	no	no	no
GCF_000699625	NZ_AMLX01000014.1	-1	38883	39026	7.4e-67	0.99	144	AACf1	no	no	no	no	no
GCF_000962025	NZ_AMLY01000063.1	3	4681	4824	5.5e-67	0.99	144	AACf1	no	no	no	no	no
GCF_000962075	NZ_AMLZ01000021.1	-1	59060	59203	4.4e-67	0.99	144	AACf1	no	no	no	no	no
GCF_000962085	NZ_AMMA01000037.1	-2	18338	18481	4.1000000000000004e-67	0.99	144	AACf1	no	no	no	no	no
GCF_000603345	NZ_AMMB01000114.1	2	23591	23734	1.0000000000000001e-66	0.99	144	AACf1	no	no	no	no	no
GCF_000603345	NZ_AMMB01000118.1	1	2334	2614	4.0000000000000006e-124	0.99	281	AACb	yes	no	no	yes	no
GCF_000603345	NZ_AMMB01000145.1	-3	295	471	5.1e-126	0.99	177	ANTd	yes	no	no	yes	no
GCF_000603365	NZ_AMMC01000034.1	-1	35710	35853	1.0000000000000001e-66	0.99	144	AACf1	no	no	no	no	no
GCF_000962115	NZ_AMMD01000099.1	-3	1937	2080	6.2e-67	0.99	144	AACf1	no	no	no	no	no
GCF_000962125	NZ_AMME01000515.1	2	1156	1299	1.4e-67	0.99	144	AACf1	no	no	no	no	no
GCF_000962165	NZ_AMMF01000224.1	-1	7604	7747	5.9e-67	0.99	144	AACf1	no	no	no	no	no
GCF_000962145	NZ_AMMG01000130.1	-3	8652	8795	4.1000000000000004e-67	0.99	144	AACf1	no	no	no	no	no
GCF_000962175	NZ_AMMH01000112.1	-2	2431	2574	1.1e-67	0.99	144	AACf1	no	no	no	no	no
GCF_000962205	NZ_AMMI01000022.1	-1	786	929	5.1e-68	0.99	144	AACf1	no	no	no	no	no
GCF_000962205	NZ_AMMI01000063.1	-1	13138	13418	7.4e-123	0.99	281	AACb	yes	no	no	yes	no
GCF_000603385	NZ_AMMJ02000003.1	2	127997	128140	8.6e-67	0.99	144	AACf1	no	no	no	no	no
GCF_000962235	NZ_AMMM01000258.1	-3	560	703	1.5e-67	0.99	144	AACf1	no	no	no	no	no
GCF_000962275	NZ_AMMN01000044.1	-2	141	284	7.699999999999999e-68	0.99	144	AACf1	no	no	no	no	no
GCF_000962305	NZ_AMMO01000276.1	2	1690	1833	8.8e-68	0.99	144	AACf1	no	no	no	no	no
GCF_000962295	NZ_AMMR01000041.1	-1	3324	3467	1.1e-67	0.99	144	AACf1	no	no	no	no	no
GCF_000962315	NZ_AMMS01000217.1	-3	24158	24438	7.800000000000001e-123	0.99	281	AACb	yes	no	yes	yes	no
GCF_000962315	NZ_AMMS01000252.1	-3	341	484	4.299999999999999e-68	0.99	144	AACf1	no	no	no	no	no
GCF_000603445	NZ_AMMT01000227.1	-2	5150	5293	2.1e-67	0.99	144	AACf1	no	no	no	no	no
GCF_000603445	NZ_AMMT01000239.1	-3	24152	24432	6.8e-123	0.99	281	AACb	yes	no	yes	yes	no
GCF_000962355	NZ_AMMU01000240.1	-1	423	566	9.4e-68	0.99	144	AACf1	no	no	no	no	no
GCF_000603465	NZ_AMMV01000264.1	3	479	622	6.8999999999999995e-68	0.99	144	AACf1	no	no	no	no	no
GCF_000603485	NZ_AMMW01000047.1	-1	1149	1292	1.6e-67	0.99	144	AACf1	no	no	no	no	no
GCF_000603485	NZ_AMMW01000113.1	2	7063	7343	4e-123	0.99	281	AACb	yes	no	no	yes	no
GCF_000486065	NZ_AMMX01000007.1	-2	418	683	4.8e-188	1.0	266	APHf	yes	no	no	no	no	streptomycin
GCF_000486085	NZ_AMMY01000029.1	3	24159	24439	1.6000000000000002e-123	0.99	281	AACb	yes	no	yes	yes	no
GCF_000486085	NZ_AMMY01000061.1	-3	127967	128110	2.1e-66	0.99	144	AACf1	no	no	no	no	no
GCF_000603505	NZ_AMMZ01000023.1	1	24153	24433	2.4e-123	0.99	281	AACb	yes	no	yes	yes	no		gentamicin
GCF_000603525	NZ_AMNA01000007.1	1	5936	6079	1.5e-67	0.99	144	AACf1	no	no	no	no	no
GCF_000603525	NZ_AMNA01000008.1	-3	25061	25341	3.2000000000000005e-123	0.99	281	AACb	yes	no	yes	yes	no
GCF_000603545	NZ_AMNC01000025.1	2	57	342	8.1e-185	1.0	286	AACh	yes	no	no	no	no
GCF_000603545	NZ_AMNC01000036.1	-2	8723	8866	1e-67	0.99	144	AACf1	no	no	no	no	no
GCF_000603565	NZ_AMND01000035.1	-3	417	682	1.0999999999999999e-187	1.0	266	APHf	yes	no	no	no	no
GCF_000603565	NZ_AMND01000036.1	-3	2623	2766	5.1000000000000005e-67	0.99	144	AACf1	no	no	no	no	no
GCF_000603585	NZ_AMNE01000027.1	3	24154	24434	1.7e-123	0.99	281	AACb	yes	no	yes	yes	no
GCF_000603585	NZ_AMNE01000043.1	-2	16623	16766	7.100000000000001e-67	0.99	144	AACf1	no	no	no	no	no
GCF_000603605	NZ_AMNF01000051.1	-3	271	414	2.8999999999999996e-68	0.99	144	AACf1	no	no	no	no	no
GCF_000603605	NZ_AMNF01000061.1	-2	57	342	1.1e-184	1.0	286	AACh	yes	no	no	no	no
GCF_000603625	NZ_AMNG01000131.1	2	6145	6288	5.8e-67	0.99	144	AACf1	no	no	no	no	no
GCF_000603625	NZ_AMNG01000143.1	2	57	342	2.3e-184	1.0	286	AACh	yes	no	no	no	no
GCF_000603645	NZ_AMNH01000012.1	2	57	342	1.9e-184	1.0	286	AACh	yes	no	no	no	no
GCF_000603645	NZ_AMNH01000052.1	2	5126	5269	2.3e-67	0.99	144	AACf1	no	no	no	no	no
GCF_000603665	NZ_AMNI01000134.1	-2	57	342	1.9e-184	1.0	286	AACh	yes	no	no	no	no	dibekacin, netilmicin, sisomicin, gentamicin, tobramycin	gentamicin
GCF_000603685	NZ_AMNJ01000003.1	-1	5053	5196	8.8e-68	0.99	144	AACf1	no	no	no	no	no
GCF_000603685	NZ_AMNJ01000053.1	2	57	342	8.8e-185	1.0	286	AACh	yes	no	no	no	no
GCF_000603705	NZ_AMNK01000089.1	2	1137	1417	1e-123	0.99	281	AACb	yes	no	no	yes	no
GCF_000603705	NZ_AMNK01000096.1	3	9519	9662	7.9e-67	0.99	144	AACf1	no	no	no	no	no
GCF_000603705	NZ_AMNK01000108.1	3	417	682	6.799999999999999e-188	1.0	266	APHf	yes	no	no	no	no
GCF_000603725	NZ_AMNL01000061.1	-3	3902	4045	6.700000000000001e-67	0.99	144	AACf1	no	no	no	no	no
GCF_000603725	NZ_AMNL01000089.1	-3	417	682	5.4e-188	1.0	266	APHf	yes	no	no	no	no
GCF_000603745	NZ_AMNM01000087.1	3	30	173	3e-67	0.99	144	AACf1	no	no	no	no	no
GCF_000603745	NZ_AMNM01000127.1	3	39	304	2.6e-188	1.0	266	APHf	yes	no	no	no	no
GCF_000603765	NZ_AMNN01000081.1	-1	1136	1416	1.1e-123	0.99	281	AACb	yes	no	no	yes	no
GCF_000603765	NZ_AMNN01000098.1	3	430	573	1.4e-67	0.99	144	AACf1	no	no	no	no	no
GCF_000603785	NZ_AMNO01000010.1	-3	24154	24434	2.3000000000000002e-123	0.99	281	AACb	yes	no	yes	yes	no
GCF_000603785	NZ_AMNO01000044.1	-1	18762	18905	6.8e-67	0.99	144	AACf1	no	no	no	no	no
GCF_000603805	NZ_AMNP01000064.1	3	205	470	7.5e-188	1.0	266	APHf	yes	no	no	no	no
GCF_000603805	NZ_AMNP01000122.1	-1	9508	9651	4.5e-67	0.99	144	AACf1	no	no	no	no	no
GCF_000603805	NZ_AMNP01000229.1	-2	24154	24434	4.4e-123	0.99	281	AACb	yes	no	no	yes	no
GCF_000603825	NZ_AMNQ01000088.1	3	760	903	4.8e-68	0.99	144	AACf1	no	no	no	no	no
GCF_000603845	NZ_AMNR01000061.1	1	2913	3056	7.499999999999999e-68	0.99	144	AACf1	no	no	no	no	no
GCF_000603845	NZ_AMNR01000106.1	3	417	682	6.999999999999999e-188	1.0	266	APHf	yes	no	no	no	no
GCF_000603865	NZ_AMNS01000031.1	-2	57	342	2.2e-184	1.0	286	AACh	yes	no	no	no	no	sisomicin, gentamicin, netilmicin, tobramycin, dibekacin	gentamicin
GCF_000603885	NZ_AMNT01000057.1	2	57	342	2.8e-184	1.0	286	AACh	yes	no	no	no	no
GCF_000603885	NZ_AMNT01000128.1	-1	35172	35315	1.3e-66	0.99	144	AACf1	no	no	no	no	no
GCF_000603905	NZ_AMNU01000030.1	-1	3804	3947	1.9e-67	0.99	144	AACf1	no	no	no	no	no
GCF_000603905	NZ_AMNU01000127.1	-2	57	342	2.7e-184	1.0	286	AACh	yes	no	no	no	no
GCF_000962435	NZ_AMNZ01000046.1	2	19111	19254	7.2e-67	0.99	144	AACf1	no	no	no	no	no
GCF_000962605	NZ_AMOA01000075.1	-1	24833	24976	4.4e-67	0.99	144	AACf1	no	no	no	no	no
GCF_000962445	NZ_AMOB01000154.1	2	1125	1268	9.7e-68	0.99	144	AACf1	no	no	no	no	no
GCF_000962625	NZ_AMOC01000059.1	-3	38086	38229	7.7e-67	0.99	144	AACf1	no	no	no	no	no
GCF_000962655	NZ_AMOD01000052.1	-1	2534	2814	4.1e-124	0.99	281	AACb	yes	no	no	yes	no		gentamicin
GCF_000962475	NZ_AMOE01000023.1	-1	2428	2571	1.5e-67	0.99	144	AACf1	no	no	no	no	no
GCF_000962485	NZ_AMOF01000057.1	2	14526	14669	2.1e-67	0.99	144	AACf1	no	no	no	no	no
GCF_000962515	NZ_AMOG01000126.1	-2	6186	6329	1.9e-67	0.99	144	AACf1	no	no	no	no	no
GCF_000962525	NZ_AMOH01000039.1	2	83290	83433	5.6e-67	0.99	144	AACf1	no	no	no	no	no
GCF_000962675	NZ_AMOI01000145.1	-1	7568	7711	6.700000000000001e-67	0.99	144	AACf1	no	no	no	no	no
GCF_000962685	NZ_AMOJ01000028.1	2	41029	41172	5.6e-67	0.99	144	AACf1	no	no	no	no	no
GCF_000962695	NZ_AMOL01000035.1	-2	17383	17526	4.5e-67	0.99	144	AACf1	no	no	no	no	no
GCF_000962725	NZ_AMOM01000082.1	-1	31697	31840	6.8e-67	0.99	144	AACf1	no	no	no	no	no
GCF_000962555	NZ_AMON01000058.1	-1	13698	13841	6.6e-67	0.99	144	AACf1	no	no	no	no	no
GCF_000307735	NZ_AMPR02000257.1	1	5176	5254	4.5e-38	0.99	79	AACi	no	no	no	no	no	dibekacin, netilmicin, sisomicin, tobramycin, amikacin	gentamicin
GCF_000307675	NZ_AMQU01000007.1	3	136443	136720	4.8e-136	0.99	278	ANTa	no	no	no	no	no	streptomycin
GCF_000300375	NZ_AMRA01000013.1	-1	19433	19613	3.8e-83	0.98	181	AACc	no	no	no	no	no	dibekacin, tobramycin, neomycin, netilmicin, sisomicin
GCF_000313345	NZ_AMRO01000025.1	-2	15940	16206	1.6e-72	0.96	267	ANTa	no	no	no	no	no	streptomycin	streptomycin
GCF_000316015	NZ_AMRS01000004.1	-2	43299	43442	1.3000000000000001e-67	0.99	144	AACf1	no	no	no	no	no
GCF_002895535	NZ_AMRY01000011.1	1	1101	1347	1.3e-79	0.95	247	APHf	no	no	no	no	no	streptomycin
GCF_000315995	NZ_AMSN01000027.1	1	15975	16118	6.8e-67	0.99	144	AACf1	no	no	no	no	no
GCF_000313935	NZ_AMSS01000072.1	1	175	354	1.4e-90	1.0	180	AACj	no	no	no	no	no	tobramycin, sisomicin, dibekacin, neomycin, netilmicin
GCF_000309175	NZ_AMSX01000037.1	3	1212	1391	4.0999999999999997e-120	1.0	180	AACj	no	no	no	no	no	neomycin, netilmicin, tobramycin, sisomicin, dibekacin
GCF_000307695	NZ_AMTC01000004.1	1	696	972	4.1e-175	1.0	277	ANTa	no	no	no	no	no	streptomycin	streptomycin
GCF_000307695	NZ_AMTC01000057.1	-2	282	459	3.2e-110	0.99	178	AACg	yes	no	no	no	yes	tobramycin, isepamicin, sisomicin, dibekacin, kanamycin, netilmicin, amikacin	amikacin
GCF_002025565	NZ_AMVN01000026.1	-1	6222	6478	7.000000000000001e-81	0.95	257	APHf	no	no	no	no	no	streptomycin
GCF_002025525	NZ_AMVO01000080.1	2	6466	6722	8.1e-81	0.95	257	APHf	no	no	no	no	no	streptomycin
GCF_002025555	NZ_AMVP01000017.1	-1	6582	6838	6.2e-81	0.95	257	APHf	no	no	no	no	no	streptomycin
GCF_002025515	NZ_AMVQ01000025.1	-1	6582	6838	8.000000000000001e-81	0.95	257	APHf	no	no	no	no	no	streptomycin
GCF_000468995	NZ_AMXT02000066.1	2	9184	9460	7e-87	0.97	277	ANTa	no	no	no	no	no	streptomycin	streptomycin
GCF_000313755	NZ_AMZB01000138.1	-2	10386	10530	5.3e-52	0.97	145	AACf1	no	no	no	no	no
GCF_000314615	NZ_AMZS01000035.1	1	72263	72406	1e-69	0.99	144	AACf1	no	no	no	no	no
GCF_000314635	NZ_AMZT01000041.1	1	244	423	2.4e-123	1.0	180	AACj	no	no	no	no	no	tobramycin, dibekacin, netilmicin, neomycin, sisomicin
GCF_000314655	NZ_AMZU01000093.1	1	77	256	4.4e-123	1.0	180	AACj	no	no	no	no	no	netilmicin, sisomicin, neomycin, dibekacin, tobramycin
GCF_000341265	NZ_ANAE01000091.1	3	1275	1574	1.6999999999999999e-84	0.96	300	APHb	no	no	no	no	no
GCF_000341265	NZ_ANAE01000127.1	3	17746	17986	2.2e-68	0.96	241	APHg	no	no	no	no	no
GCF_000330705	NZ_ANAM01000006.1	1	131261	131401	8.7e-43	0.96	141	AACf1	no	no	no	no	no	sisomicin, amikacin, tobramycin, kanamycin, isepamicin, netilmicin, dibekacin
GCF_000309525	NZ_ANAU01000003.1	2	597	770	1.2e-51	0.98	174	AACg	no	no	no	no	no	isepamicin, sisomicin, kanamycin, tobramycin, amikacin, netilmicin, dibekacin
GCF_000341105	NZ_ANBB01000013.1	3	35544	35847	3.4000000000000003e-128	0.99	304	APHb	no	no	no	no	no
GCF_000341165	NZ_ANBG01000372.1	1	215	390	1.5e-60	0.97	176	AACc	no	no	no	no	no	netilmicin, dibekacin, sisomicin, tobramycin, neomycin
GCF_001582015	NZ_ANBO01000001.1	-3	169637	169818	1.2e-84	0.99	182	AACc	no	no	no	no	no	sisomicin, dibekacin, neomycin, netilmicin, tobramycin
GCF_000342445	NZ_ANBV01000005.1	2	37927	38154	2.6000000000000002e-37	0.95	228	ANTb	no	no	no	no	no	kanamycin, dibekacin, tobramycin, isepamicin, neomycin, amikacin
GCF_000311045	NZ_ANES01000057.1	3	2793	3066	4.9e-143	1.0	274	ANTa	no	no	no	no	no	streptomycin	streptomycin
GCF_000331225	NZ_ANFY01000005.1	1	94299	94561	6.5e-95	0.98	263	AACb	no	no	no	no	no		gentamicin
GCF_000319755	NZ_ANGA01000068.1	3	1016	1188	1.3e-53	0.97	173	AACg	no	no	no	no	no	sisomicin, dibekacin, isepamicin, netilmicin, amikacin, kanamycin, tobramycin
GCF_000321325	NZ_ANGL01000074.1	1	9744	9886	1.8e-43	0.98	143	AACf1	no	no	no	no	no	netilmicin, tobramycin, dibekacin, sisomicin, amikacin, kanamycin, isepamicin
GCF_000314205	NZ_ANGU01000018.1	2	1946	2088	1.6e-45	0.98	143	AACf1	no	no	no	no	no	netilmicin, sisomicin, tobramycin, dibekacin, amikacin, isepamicin, kanamycin
GCF_000314225	NZ_ANGV01000206.1	2	1063	1205	1.3e-45	0.98	143	AACf1	no	no	no	no	no	netilmicin, isepamicin, sisomicin, tobramycin, amikacin, kanamycin, dibekacin
GCF_000376525	NZ_ANHR01000036.1	1	1456	1599	9.7e-67	0.99	144	AACf1	no	no	no	no	no
GCF_000340415	NZ_ANMG01000048.1	1	5230	5401	1.8e-62	0.98	172	AACc	no	no	no	no	no	neomycin, sisomicin, tobramycin, netilmicin, dibekacin
GCF_000524625	NZ_ANMP01000001.1	1	7908	8185	1.7e-80	0.98	278	ANTa	no	no	no	no	no	streptomycin	streptomycin
GCF_000342065	NZ_ANNC01000013.1	2	192	371	2.3000000000000002e-123	1.0	180	AACj	no	no	no	no	no	netilmicin, dibekacin, tobramycin, neomycin, sisomicin
GCF_000342065	NZ_ANNC01000053.1	2	1277	1452	1.1000000000000001e-101	0.99	176	AACa	yes	no	no	yes	no	fortimicin, gentamicin, sisomicin
GCF_002002625	NZ_ANNP01000014.1	1	56079	56409	1.2e-202	0.99	331	APHd1	no	no	no	no	no	spectinomycin
GCF_002002645	NZ_ANNQ01000014.1	3	181332	181660	5.7e-202	0.99	329	APHd1	no	no	no	no	no	spectinomycin
GCF_002002645	NZ_ANNQ01000020.1	2	10710	10985	1.7999999999999998e-69	0.95	276	ANTa	no	no	no	no	no	streptomycin
GCF_000478385	NZ_ANOI01000001.1	1	421369	421546	5.099999999999999e-109	0.99	178	AACg	no	no	no	no	no	netilmicin, kanamycin, sisomicin, isepamicin, amikacin, dibekacin, tobramycin	amikacin
GCF_000330625	NZ_ANOT01000035.1	3	61178	61321	6e-68	0.99	144	AACf1	no	no	no	no	no
GCF_000330645	NZ_ANOU01000059.1	2	162216	162359	1.3000000000000001e-67	0.99	144	AACf1	no	no	no	no	no
GCF_000331185	NZ_ANSJ01000021.1	1	18607	18865	4.700000000000001e-72	0.96	259	APHc	no	no	no	no	no
GCF_000331185	NZ_ANSJ01000030.1	3	15093	15395	2.6e-153	0.98	303	APHb	no	no	no	no	no
GCF_000331185	NZ_ANSJ01000058.1	3	10825	10996	3.1e-63	0.98	172	AACc	no	no	no	no	no
GCF_000326345	NZ_ANYC01000103.1	2	44	329	5e-186	1.0	286	AACh	yes	no	no	no	no	netilmicin, gentamicin, sisomicin, dibekacin, tobramycin	gentamicin
GCF_000326365	NZ_ANYE01000138.1	2	66	351	7.700000000000001e-186	1.0	286	AACh	yes	no	no	no	no	gentamicin, tobramycin, sisomicin, dibekacin, netilmicin	gentamicin
GCF_000328345	NZ_AOBR01000044.1	2	3043	3296	4.4e-77	0.98	254	ANTb	no	no	no	no	no	neomycin, dibekacin, amikacin, isepamicin, tobramycin, kanamycin
GCF_000349285	NZ_AOCV01000053.1	3	1	184	1.0999999999999999e-127	0.99	184	AACe1	yes	no	no	no	no	netilmicin, dibekacin, amikacin, tobramycin, kanamycin, isepamicin, sisomicin	amikacin
GCF_000341985	NZ_AODW01000007.1	3	47	226	2.7e-120	1.0	180	AACj	no	no	no	no	no	sisomicin, neomycin, tobramycin, dibekacin, netilmicin
GCF_000342105	NZ_AOFM01000014.1	3	23361	23635	2.8e-108	0.98	275	ANTa	no	no	no	no	no	streptomycin	streptomycin
GCF_000513755	NZ_AOFO01000007.1	2	37253	37528	1.8e-132	0.99	276	ANTa	no	no	no	no	no	streptomycin	streptomycin
GCF_000364505	NZ_AOFU01000008.1	-2	156	333	6.1e-111	0.99	178	AACg	yes	no	no	no	no	dibekacin, isepamicin, netilmicin, kanamycin, tobramycin, sisomicin, amikacin	amikacin
GCF_000353895	NZ_AOGD01000003.1	1	107	286	1.2e-123	1.0	180	AACj	no	no	no	no	no	neomycin, sisomicin, netilmicin, dibekacin, tobramycin
GCF_000332835	NZ_AOGE01000019.1	3	9109	9248	1.2e-51	0.96	140	AACf1	no	no	no	no	no
GCF_000332835	NZ_AOGE01000124.1	2	1135	1419	2.3999999999999998e-181	1.0	285	AACh	no	no	no	no	no
GCF_000344865	NZ_AOGG01000003.1	1	151163	151306	3.3e-67	0.99	144	AACf1	no	no	no	no	no
GCF_000344885	NZ_AOGH01000006.1	-3	57484	57627	1.2e-65	0.99	144	AACf1	no	no	no	no	no
GCF_000344885	NZ_AOGH01000047.1	-1	842	1037	2.4e-129	0.99	196	AACe1	yes	no	no	yes	yes
GCF_000344845	NZ_AOGI01000003.1	-1	221559	221702	2.8e-67	0.99	144	AACf1	no	no	no	no	no
GCF_000344825	NZ_AOGJ01000001.1	1	57463	57606	1.3000000000000001e-67	0.99	144	AACf1	no	no	no	no	no
GCF_000349245	NZ_AOGO01000058.1	1	7060	7236	6.6e-125	0.99	177	ANTd	yes	no	no	yes	no	gentamicin, kanamycin, sisomicin, tobramycin, dibekacin	gentamicin, kanamycin
GCF_000349265	NZ_AOGQ01000019.1	3	1320	1512	1.4e-130	0.99	193	AACe1	yes	no	no	no	yes	sisomicin, netilmicin, amikacin, dibekacin, tobramycin, kanamycin, isepamicin	amikacin
GCF_000347975	NZ_AOGU01000015.1	-1	4434	4578	1.4e-46	0.95	145	AACf1	no	no	no	no	no
GCF_000510915	NZ_AOHN01000013.1	-2	51044	51282	4e-77	0.96	239	APHf	no	no	no	no	no	streptomycin
GCF_000342345	NZ_AOHP01000080.1	3	16438	16729	2.5e-95	0.97	292	APHb	no	no	no	no	no
GCF_000416385	NZ_AOHQ01000141.1	3	21706	21887	1.3e-84	0.96	182	AACc	no	no	no	no	no	tobramycin, dibekacin, netilmicin, sisomicin, neomycin
GCF_000342145	NZ_AOIH01000060.1	-2	397	588	2.5e-131	0.99	192	AACe1	no	no	no	yes	no	isepamicin, dibekacin, kanamycin, sisomicin, tobramycin, amikacin, netilmicin	amikacin
GCF_000342145	NZ_AOIH01000067.1	-2	11	187	1.7e-124	0.99	177	ANTd	no	no	no	no	no	kanamycin, gentamicin, sisomicin, dibekacin, tobramycin	kanamycin, gentamicin
GCF_000511155	NZ_AOJA01000039.1	1	60999	61254	3.8e-75	0.95	256	APHf	no	no	no	no	no	streptomycin
GCF_000372545	NZ_AOMG02000031.1	3	5990	6170	3.4e-103	0.99	181	AACc	no	no	no	no	no	dibekacin, tobramycin, netilmicin, neomycin, sisomicin
GCF_000419295	NZ_AOPX01000001.1	1	26289	26469	5.0999999999999996e-95	0.99	181	AACc	no	no	no	no	no	neomycin, sisomicin, dibekacin, tobramycin, netilmicin
GCF_000414115	NZ_AOPZ01000307.1	1	1031	1276	5.8e-110	0.98	246	APHg	no	no	no	no	yes	spectinomycin
GCF_000350485	NZ_AORV01000031.1	-3	30444	30714	9.8e-75	0.97	271	ANTa	no	no	no	no	no	streptomycin	streptomycin
GCF_000342125	NZ_AORZ01000035.1	1	15547	15827	8.8e-51	0.97	281	APHb	no	no	no	no	no
GCF_000342125	NZ_AORZ01000090.1	3	2900	3207	2.7e-106	0.97	308	APHb	no	no	no	no	no
GCF_000350465	NZ_AOSM01000115.1	2	17007	17171	2.3e-64	0.97	165	AACd	no	no	no	no	no
GCF_000359725	NZ_AOSP01000099.1	1	56	216	1.1e-88	0.99	161	AACd	yes	no	no	no	no	tobramycin, isepamicin, sisomicin, amikacin, dibekacin, netilmicin, kanamycin
GCF_001447405	NZ_AOTC01000106.1	-1	385	725	1.2e-248	1.0	341	APHa	yes	no	no	no	no	hygromycin
GCF_001447405	NZ_AOTC01000106.1	-1	123	201	3.8e-55	0.99	79	AACi	yes	no	no	no	no	amikacin, dibekacin, sisomicin, tobramycin, netilmicin
GCF_000350505	NZ_AOUG01000045.1	-2	56985	57129	1.6e-45	0.95	145	AACf1	no	no	no	no	no
GCF_000486105	NZ_AOXC01000026.1	-1	58479	58622	1.7e-67	0.99	144	AACf1	no	no	no	no	no
GCF_000486125	NZ_AOXD01000109.1	3	4292	4435	1.8999999999999998e-68	0.99	144	AACf1	no	no	no	no	no
GCF_000486145	NZ_AOXE01000008.1	-2	18850	18993	5.7e-66	0.99	144	AACf1	no	no	no	no	no
GCF_000486185	NZ_AOXG01000047.1	1	260724	260867	1.2e-66	0.99	144	AACf1	no	no	no	no	no
GCF_000486205	NZ_AOXH01000064.1	-2	6087	6230	4e-68	0.99	144	AACf1	no	no	no	no	no
GCF_000486225	NZ_AOXI01000023.1	-3	55983	56126	4.7e-66	0.99	144	AACf1	no	no	no	no	no
GCF_000486245	NZ_AOXJ01000101.1	-3	1782	1925	5.5e-67	0.99	144	AACf1	no	no	no	no	no
GCF_000486265	NZ_AOXK01000314.1	-1	1822	1965	3.4999999999999997e-68	0.99	144	AACf1	no	no	no	no	no
GCF_000486305	NZ_AOXM01000257.1	-2	3753	3896	7.199999999999999e-69	0.99	144	AACf1	no	no	no	no	no
GCF_000486325	NZ_AOXN01000012.1	3	3400	3543	6.1e-68	0.99	144	AACf1	no	no	no	no	no
GCF_000486385	NZ_AOXQ01000239.1	-1	635	778	3.2e-69	0.99	144	AACf1	no	no	no	no	no
GCF_000486465	NZ_AOXU01000016.1	2	37570	37713	1.8e-67	0.99	144	AACf1	no	no	no	no	no
GCF_000486485	NZ_AOXV01000033.1	-2	1517	1660	5.4e-69	0.99	144	AACf1	no	no	no	no	no
GCF_000486505	NZ_AOXW01000006.1	-1	34235	34378	1.3e-68	0.99	144	AACf1	no	no	no	no	no
GCF_000486545	NZ_AOXY01000026.1	2	58229	58372	1.3000000000000001e-67	0.99	144	AACf1	no	no	no	no	no
GCF_000486565	NZ_AOXZ01000055.1	-3	558	701	3.7999999999999996e-68	0.99	144	AACf1	no	no	no	no	no
GCF_000486605	NZ_AOYB01000097.1	-1	25735	25878	6.8e-67	0.99	144	AACf1	no	no	no	no	no
GCF_000486625	NZ_AOYC01000057.1	2	25478	25621	3.1e-68	0.99	144	AACf1	no	no	no	no	no
GCF_000486665	NZ_AOYE01000014.1	1	44495	44638	1.9e-67	0.99	144	AACf1	no	no	no	no	no
GCF_000486705	NZ_AOYG01000086.1	-1	60116	60259	7.4e-67	0.99	144	AACf1	no	no	no	no	no
GCF_000486745	NZ_AOYI01000001.1	-2	136352	136495	8.5e-67	0.99	144	AACf1	no	no	no	no	no
GCF_000486835	NZ_AOYN01000004.1	-2	16	159	2.6e-68	0.99	144	AACf1	no	no	no	no	no
GCF_000486875	NZ_AOYP01000068.1	-3	37401	37544	3.7999999999999996e-68	0.99	144	AACf1	no	no	no	no	no
GCF_000486895	NZ_AOYQ01000057.1	-2	3401	3544	1.3e-68	0.99	144	AACf1	no	no	no	no	no
GCF_000486955	NZ_AOYT01000040.1	3	58468	58611	4.6e-68	0.99	144	AACf1	no	no	no	no	no
GCF_000486975	NZ_AOYU01000011.1	2	60113	60256	6e-68	0.99	144	AACf1	no	no	no	no	no
GCF_000487075	NZ_AOYZ01000018.1	-1	14153	14296	1.1e-67	0.99	144	AACf1	no	no	no	no	no
GCF_000487095	NZ_AOZA01000076.1	-1	51541	51684	3.1e-67	0.99	144	AACf1	no	no	no	no	no
GCF_000487115	NZ_AOZB01000110.1	-2	26265	26407	9.9e-68	0.99	143	AACf1	no	no	no	no	no
GCF_000487135	NZ_AOZC01000053.1	2	5925	6068	1.4999999999999998e-68	0.99	144	AACf1	no	no	no	no	no
GCF_000487175	NZ_AOZE01000026.1	-1	47930	48073	1.9e-67	0.99	144	AACf1	no	no	no	no	no
GCF_000487215	NZ_AOZG01000013.1	3	103036	103179	4.8e-68	0.99	144	AACf1	no	no	no	no	no
GCF_000487275	NZ_AOZJ01000075.1	-2	9916	10059	9.2e-67	0.99	144	AACf1	no	no	no	no	no
GCF_000487335	NZ_AOZM01000002.1	1	43858	44001	2.1e-67	0.99	144	AACf1	no	no	no	no	no
GCF_000487355	NZ_AOZN01000044.1	-3	82247	82390	4.9e-68	0.99	144	AACf1	no	no	no	no	no
GCF_000487375	NZ_AOZO01000025.1	2	16400	16543	2.0999999999999997e-68	0.99	144	AACf1	no	no	no	no	no
GCF_000487395	NZ_AOZP01000128.1	3	1264	1407	2.8999999999999996e-68	0.99	144	AACf1	no	no	no	no	no
GCF_000487435	NZ_AOZR01000120.1	1	2140	2283	1.2e-68	0.99	144	AACf1	no	no	no	no	no
GCF_000487475	NZ_AOZU01000065.1	3	63034	63177	1.4e-67	0.99	144	AACf1	no	no	no	no	no
GCF_000487495	NZ_AOZV01000048.1	-2	162012	162155	1.2e-67	0.99	144	AACf1	no	no	no	no	no
GCF_000487555	NZ_AOZY01000039.1	1	45920	46063	1.1e-67	0.99	144	AACf1	no	no	no	no	no
GCF_000523045	NZ_AP012496.1	3	1116694	1116946	1.5e-182	1.0	253	ANTb	no	no	no	no	no	amikacin, isepamicin, kanamycin, dibekacin, neomycin, tobramycin
GCF_000828775	NZ_AP013063.1	3	1292621	1292763	3.9e-59	0.98	143	AACf1	no	no	no	no	no
GCF_000828795	NZ_AP013357.1	1	466747	466939	5.400000000000001e-130	0.99	193	AACe1	no	no	no	yes	yes	sisomicin, tobramycin, amikacin, dibekacin, kanamycin, netilmicin, isepamicin	amikacin
GCF_000828695	NZ_AP014522.1	2	2104852	2104995	6.200000000000001e-57	0.96	144	AACf1	no	no	no	no	no
GCF_000497265	NZ_AP014547.1	3	1487249	1487423	1.4e-70	0.97	175	AACc	no	no	no	no	no	dibekacin, sisomicin, neomycin, netilmicin, tobramycin
GCF_000828595	NZ_AP014565.1	1	610754	610897	1.1e-67	0.99	144	AACf1	no	no	no	no	no
GCF_003584725	NZ_AP014567.1	3	1013041	1013218	5.8000000000000005e-86	0.99	178	AACc	no	no	no	no	no	netilmicin, tobramycin, dibekacin, sisomicin, neomycin
GCF_000829275	NZ_AP014622.1	-1	1002833	1003024	2.1999999999999997e-129	0.99	192	AACe2	no	no	no	yes	no
GCF_000829275	NZ_AP014622.1	1	1277490	1277634	1.8e-51	0.97	145	AACf1	no	no	no	yes	no
GCF_002355875	NZ_AP014623.1	1	2089670	2089813	6.199999999999999e-55	0.98	144	AACf1	no	no	no	no	no	sisomicin, amikacin, netilmicin, isepamicin, tobramycin, kanamycin, dibekacin
GCF_002142475	NZ_AP014640.1	-2	122597	122739	7.7e-47	0.98	143	AACf1	yes	no	no	no	no
GCF_002142495	NZ_AP014644.1	-2	122597	122739	7.7e-47	0.98	143	AACf1	yes	no	no	no	no
GCF_000829255	NZ_AP014646.1	-2	1443169	1443360	2.3e-129	0.99	192	AACe2	no	no	no	yes	no
GCF_000828475	NZ_AP014648.1	3	760854	761115	2.5e-74	0.97	262	AACb	no	no	no	no	no		gentamicin
GCF_001547955	NZ_AP014651.1	3	1764385	1764561	1.9e-124	0.99	177	ANTd	no	no	yes	yes	no	sisomicin, tobramycin, gentamicin, dibekacin, kanamycin	gentamicin, kanamycin
GCF_001549655	NZ_AP014652.1	-3	909526	909778	1.1e-182	1.0	253	ANTb	no	no	yes	no	yes	kanamycin, isepamicin, tobramycin, neomycin, amikacin, dibekacin
GCF_001549675	NZ_AP014653.1	-3	909526	909778	1.1e-182	1.0	253	ANTb	no	no	yes	no	yes	kanamycin, dibekacin, neomycin, amikacin, tobramycin, isepamicin
GCF_002356575	NZ_AP014833.1	1	911607	911780	4.9e-52	0.98	174	AACg	no	no	no	no	no	netilmicin, isepamicin, sisomicin, kanamycin, dibekacin, tobramycin, amikacin
GCF_001548175	NZ_AP014864.1	2	944087	944259	7e-52	0.97	173	AACg	no	no	no	no	no	netilmicin, amikacin, tobramycin, isepamicin, sisomicin, dibekacin, kanamycin
GCF_002356675	NZ_AP014921.1	-2	681537	681714	1e-108	0.99	178	AACg	no	no	no	no	yes	amikacin, sisomicin, netilmicin, tobramycin, kanamycin, isepamicin, dibekacin	amikacin
GCF_002356175	NZ_AP014956.1	-2	812835	813087	1.9e-182	1.0	253	ANTb	no	no	yes	no	yes	amikacin, tobramycin, isepamicin, kanamycin, dibekacin, neomycin
GCF_001548375	NZ_AP017295.1	-3	639227	639401	2.5000000000000002e-48	0.97	175	ANTd	no	no	no	no	no	sisomicin, gentamicin, dibekacin, tobramycin, kanamycin	gentamicin, kanamycin
GCF_001548335	NZ_AP017302.1	-3	2160965	2161141	1.9e-124	0.99	177	ANTd	no	no	no	yes	no	dibekacin, gentamicin, sisomicin, kanamycin, tobramycin	kanamycin, gentamicin
GCF_001548335	NZ_AP017302.1	2	869635	869826	3.5e-128	0.99	192	AACe1	no	no	yes	yes	yes	amikacin, sisomicin, isepamicin, dibekacin, tobramycin, kanamycin, netilmicin	amikacin
GCF_001548455	NZ_AP017305.1	1	1173091	1173233	8.6e-45	0.98	143	AACf1	no	no	no	no	no
GCF_001548415	NZ_AP017320.1	-1	939599	939851	2.2e-182	1.0	253	ANTb	no	no	yes	no	yes	amikacin, dibekacin, tobramycin, kanamycin, isepamicin, neomycin
GCF_001548415	NZ_AP017321.1	3	523	700	1.8e-110	0.99	178	AACg	yes	no	yes	no	yes	tobramycin, netilmicin, isepamicin, kanamycin, amikacin, dibekacin, sisomicin
GCF_002357895	NZ_AP017618.1	2	34822	35107	2.1e-185	1.0	286	AACh	yes	no	yes	no	yes	tobramycin, dibekacin, netilmicin, sisomicin, gentamicin	gentamicin
GCF_002357875	NZ_AP017621.1	2	34822	35107	2.1e-185	1.0	286	AACh	yes	no	yes	no	yes	tobramycin, netilmicin, sisomicin, dibekacin, gentamicin	gentamicin
GCF_002355775	NZ_AP017624.1	2	1755799	1755979	1.1e-94	0.99	181	AACc	no	no	no	no	no	neomycin, tobramycin, netilmicin, sisomicin, dibekacin
GCF_002356495	NZ_AP017635.1	3	486790	486970	4.4e-95	0.99	181	AACc	no	no	no	no	no	neomycin, sisomicin, dibekacin, tobramycin, netilmicin
GCF_002356035	NZ_AP017900.1	3	504157	504300	1e-46	0.98	144	AACf1	no	no	no	no	no
GCF_002356215	NZ_AP017959.1	3	249510	249666	8.600000000000001e-74	0.98	157	AACa	no	no	no	no	no	gentamicin, fortimicin, sisomicin	gentamicin
GCF_002356335	NZ_AP018165.1	3	1509240	1509414	5.199999999999999e-69	0.97	175	AACc	no	no	no	no	no	dibekacin, netilmicin, neomycin, tobramycin, sisomicin
GCF_002368195	NZ_AP018178.1	1	1378638	1378781	4.1999999999999996e-47	0.99	144	AACf1	no	no	no	no	no
GCF_002368215	NZ_AP018184.1	1	637574	637748	6.6e-48	0.97	175	ANTd	no	no	no	no	no	dibekacin, gentamicin, sisomicin, kanamycin, tobramycin	gentamicin, kanamycin
GCF_002368255	NZ_AP018205.1	-1	44186	44328	8.5e-47	0.98	143	AACf1	yes	no	no	no	no
GCF_002368015	NZ_AP018217.1	-1	67547	67718	5e-50	0.96	172	ANTd	yes	no	no	no	no	kanamycin, gentamicin, tobramycin, sisomicin, dibekacin	gentamicin, kanamycin
GCF_002368095	NZ_AP018227.1	3	1067599	1067863	9.3e-64	0.95	265	AACb	no	no	no	no	no		gentamicin
GCF_002368295	NZ_AP018249.1	2	51365	51515	1e-67	0.97	151	AACa	yes	no	no	no	no	gentamicin, sisomicin, fortimicin	gentamicin
GCF_002368315	NZ_AP018298.1	-2	1204192	1204334	2.7e-46	0.98	143	AACf1	no	no	no	no	no
GCF_002368055	NZ_AP018308.1	-2	75505	75655	1.2e-67	0.97	151	AACa	yes	no	no	no	no	gentamicin, fortimicin, sisomicin	gentamicin
GCF_003609975	NZ_AP018400.1	1	181427	181565	1.6e-36	0.95	139	AACf1	no	no	no	no	no
GCF_003609715	NZ_AP018436.1	2	1528052	1528226	2.2e-70	0.97	175	AACc	no	no	no	no	no	dibekacin, netilmicin, neomycin, sisomicin, tobramycin
GCF_003966385	NZ_AP018539.1	3	24906	25182	1.2e-170	1.0	277	ANTa	yes	no	yes	no	yes	streptomycin	streptomycin
GCF_003115475	NZ_AP018557.1	3	1487	1680	1.9000000000000001e-119	0.99	194	AACe1	yes	no	yes	yes	no	kanamycin, isepamicin, netilmicin, dibekacin, amikacin, sisomicin, tobramycin	amikacin
GCF_003966585	NZ_AP018585.1	3	370219	370396	4.7e-109	0.99	178	AACg	no	no	no	no	yes	netilmicin, dibekacin, amikacin, tobramycin, sisomicin, kanamycin, isepamicin	amikacin
GCF_003966605	NZ_AP018586.1	2	85195	85372	4.6e-109	0.99	178	AACg	no	no	no	no	yes	tobramycin, kanamycin, netilmicin, sisomicin, dibekacin, amikacin, isepamicin	amikacin
GCF_003966625	NZ_AP018587.1	2	81352	81529	4.6e-109	0.99	178	AACg	no	no	no	no	yes	dibekacin, amikacin, tobramycin, sisomicin, kanamycin, isepamicin, netilmicin	amikacin
GCF_003584585	NZ_AP018672.1	2	13470	13755	7.5e-185	1.0	286	AACh	yes	no	yes	no	no	gentamicin, tobramycin, dibekacin, netilmicin, sisomicin	gentamicin
GCF_003584585	NZ_AP018673.1	3	14786	15071	1.4e-185	1.0	286	AACh	yes	no	yes	no	yes	dibekacin, netilmicin, gentamicin, sisomicin, tobramycin	gentamicin
GCF_003584585	NZ_AP018673.1	3	13789	13982	1.9e-129	0.99	194	AACe1	yes	no	no	yes	yes	isepamicin, tobramycin, dibekacin, amikacin, sisomicin, kanamycin, netilmicin	amikacin
GCF_003574235	NZ_AP018747.1	1	658717	658910	3.6e-126	0.99	194	AACe1	no	no	no	yes	yes	sisomicin, dibekacin, netilmicin, tobramycin, amikacin, kanamycin, isepamicin	amikacin
GCF_003574235	NZ_AP018748.1	2	87133	87325	2.4000000000000004e-130	0.99	193	AACe1	yes	no	yes	no	yes	amikacin, dibekacin, tobramycin, kanamycin, sisomicin, isepamicin, netilmicin	amikacin
GCF_003574235	NZ_AP018748.1	2	94515	94708	1.9e-127	0.99	194	AACe1	yes	no	yes	yes	yes	amikacin, sisomicin, kanamycin, tobramycin, netilmicin, dibekacin, isepamicin	amikacin
GCF_003574255	NZ_AP018750.1	2	681640	681833	3.7e-126	0.99	194	AACe1	no	no	no	yes	yes	netilmicin, dibekacin, isepamicin, kanamycin, tobramycin, amikacin, sisomicin	amikacin
GCF_003574255	NZ_AP018752.1	1	7393	7585	2.3e-131	0.99	193	AACe1	yes	no	no	yes	no	netilmicin, dibekacin, amikacin, tobramycin, isepamicin, sisomicin, kanamycin	amikacin
GCF_003574275	NZ_AP018753.1	1	681640	681833	3.7e-126	0.99	194	AACe1	no	no	no	yes	yes	netilmicin, sisomicin, dibekacin, amikacin, isepamicin, kanamycin, tobramycin	amikacin
GCF_003574275	NZ_AP018755.1	2	7379	7571	2.3e-131	0.99	193	AACe1	yes	no	no	yes	no	kanamycin, netilmicin, isepamicin, tobramycin, amikacin, dibekacin, sisomicin	amikacin
GCF_003925915	NZ_AP018758.1	3	1586	1781	1.1e-132	0.99	196	AACe1	yes	no	yes	yes	no	dibekacin, tobramycin, isepamicin, kanamycin, amikacin, sisomicin, netilmicin	amikacin
GCF_003966425	NZ_AP018799.1	-3	20544	20829	1.5e-184	1.0	286	AACh	yes	no	yes	no	yes	tobramycin, sisomicin, netilmicin, gentamicin, dibekacin	gentamicin
GCF_003966675	NZ_AP018824.1	1	922157	922336	7.2e-79	0.99	180	AACj	no	no	no	no	no	neomycin, netilmicin, dibekacin, tobramycin, sisomicin
GCF_003966545	NZ_AP018935.1	1	85887	86064	3.5e-109	0.99	178	AACg	no	no	no	no	yes	amikacin, tobramycin, netilmicin, dibekacin, isepamicin, sisomicin, kanamycin	amikacin
GCF_003967055	NZ_AP019009.1	1	1473307	1473449	1.1e-58	0.99	143	AACf1	no	no	no	no	no
GCF_003925855	NZ_AP019196.1	1	19818	19979	1.0000000000000001e-88	0.99	162	AACd	yes	no	no	yes	no	sisomicin, tobramycin, isepamicin, kanamycin, amikacin, dibekacin, netilmicin
GCF_003945405	NZ_AP019305.1	-2	750070	750247	5.3e-109	0.99	178	AACg	no	no	no	no	yes	netilmicin, tobramycin, isepamicin, amikacin, sisomicin, kanamycin, dibekacin	amikacin
GCF_003945425	NZ_AP019306.1	-3	785211	785388	5.4e-109	0.99	178	AACg	no	no	no	no	yes	sisomicin, kanamycin, tobramycin, isepamicin, amikacin, netilmicin, dibekacin	amikacin
GCF_003925875	NZ_AP019309.1	3	507397	507673	5.2e-176	1.0	277	ANTa	no	no	no	no	no	streptomycin	streptomycin
GCF_006741505	NZ_AP019692.1	2	846774	846917	1.6999999999999998e-69	0.99	144	AACf1	no	no	no	no	no
GCF_007185035	NZ_AP019752.1	1	3676	3928	3.6e-184	1.0	253	ANTb	yes	no	yes	no	yes	tobramycin, kanamycin, dibekacin, amikacin, isepamicin, neomycin
GCF_007185035	NZ_AP019752.1	1	5036	5213	1.6e-110	0.99	178	AACg	yes	no	yes	no	yes	kanamycin, tobramycin, amikacin, sisomicin, netilmicin, isepamicin, dibekacin
GCF_000487595	NZ_APAA01000151.1	-3	1847	1990	5.1000000000000005e-67	0.99	144	AACf1	no	no	no	no	no
GCF_000487655	NZ_APAD01000074.1	1	2468	2611	8.8e-68	0.99	144	AACf1	no	no	no	no	no
GCF_000487675	NZ_APAE01000386.1	-2	86	229	8e-68	0.99	144	AACf1	no	no	no	no	no
GCF_000487695	NZ_APAF01000291.1	2	746	888	1.9e-69	0.99	143	AACf1	no	no	no	no	no
GCF_000487715	NZ_APAG01000421.1	-1	113	256	1.1e-68	0.99	144	AACf1	no	no	no	no	no
GCF_000487735	NZ_APAH01000116.1	2	4659	4802	7.099999999999999e-68	0.99	144	AACf1	no	no	no	no	no
GCF_000487795	NZ_APAK01000147.1	2	5086	5229	1.2e-67	0.99	144	AACf1	no	no	no	no	no
GCF_000487815	NZ_APAL01000283.1	2	4915	5058	8.7e-68	0.99	144	AACf1	no	no	no	no	no
GCF_000487835	NZ_APAM01000126.1	1	11204	11347	8.4e-67	0.99	144	AACf1	no	no	no	no	no
GCF_000487875	NZ_APAO01000008.1	-2	15357	15500	2.8999999999999996e-68	0.99	144	AACf1	no	no	no	no	no
GCF_000487895	NZ_APAP01000113.1	-3	4824	4967	2.8999999999999996e-68	0.99	144	AACf1	no	no	no	no	no
GCF_000353935	NZ_APAW01000167.1	2	123	298	8.3e-102	0.99	176	AACa	no	no	no	yes	no	gentamicin, fortimicin, sisomicin	gentamicin
GCF_000353855	NZ_APBB01000171.1	2	105	280	1e-101	0.99	176	AACa	yes	no	no	yes	no	sisomicin, gentamicin, fortimicin
GCF_000353855	NZ_APBB01000182.1	2	121	281	4.6000000000000003e-88	0.99	161	AACd	no	no	no	no	no	amikacin, dibekacin, netilmicin, tobramycin, isepamicin, sisomicin, kanamycin
GCF_000354035	NZ_APBC01000161.1	2	132	307	1.3e-101	0.99	176	AACa	no	no	no	yes	no	fortimicin, sisomicin, gentamicin	gentamicin
GCF_000354055	NZ_APBD01000168.1	1	129	304	1.2e-101	0.99	176	AACa	no	no	no	yes	no	fortimicin, sisomicin, gentamicin	gentamicin
GCF_000354075	NZ_APBE01000049.1	1	213	392	1.6000000000000002e-123	1.0	180	AACj	no	no	no	no	no	netilmicin, sisomicin, tobramycin, dibekacin, neomycin
GCF_000354075	NZ_APBE01000152.1	3	75	250	9.7e-102	0.99	176	AACa	no	no	no	yes	no	fortimicin, sisomicin, gentamicin
GCF_000354095	NZ_APBF01000216.1	2	167	327	7e-88	0.99	161	AACd	no	no	no	no	no	kanamycin, sisomicin, amikacin, dibekacin, tobramycin, isepamicin, netilmicin
GCF_000354135	NZ_APBI01000231.1	1	166	326	8.000000000000001e-88	0.99	161	AACd	no	no	no	no	no	tobramycin, kanamycin, amikacin, netilmicin, isepamicin, sisomicin, dibekacin
GCF_000353795	NZ_APBJ01000047.1	3	192	371	1.8000000000000002e-123	1.0	180	AACj	no	no	no	no	no	netilmicin, tobramycin, dibekacin, neomycin, sisomicin
GCF_000353795	NZ_APBJ01000167.1	2	135	310	1.2e-101	0.99	176	AACa	no	no	no	yes	no	gentamicin, sisomicin, fortimicin
GCF_000353795	NZ_APBJ01000172.1	1	167	327	5.4e-88	0.99	161	AACd	no	no	no	no	no	sisomicin, kanamycin, tobramycin, isepamicin, netilmicin, dibekacin, amikacin
GCF_000353815	NZ_APBK01000048.1	3	232	411	2e-123	1.0	180	AACj	no	no	no	no	no	neomycin, tobramycin, sisomicin, dibekacin, netilmicin
GCF_000354155	NZ_APBL01000041.1	2	230	409	2.9e-123	1.0	180	AACj	no	no	no	no	no	neomycin, sisomicin, tobramycin, dibekacin, netilmicin
GCF_000354155	NZ_APBL01000254.1	1	125	300	1.8e-101	0.99	176	AACa	no	no	no	yes	no	sisomicin, gentamicin, fortimicin
GCF_000353565	NZ_APBN01000003.1	2	26437	26610	9.6e-48	0.97	174	AACg	no	no	no	no	no	kanamycin, netilmicin, dibekacin, amikacin, isepamicin, tobramycin, sisomicin
GCF_000353565	NZ_APBN01000011.1	2	5400	5676	5.9999999999999996e-114	0.99	277	ANTa	no	no	no	no	no	streptomycin
GCF_001051545	NZ_APGQ01000002.1	1	7947	8090	2.2e-67	0.99	144	AACf1	no	no	no	no	no
GCF_001051525	NZ_APGR01000145.1	2	7363	7506	9.7e-68	0.99	144	AACf1	no	no	no	no	no
GCF_001051535	NZ_APGS01000102.1	2	1162	1305	5.2999999999999995e-68	0.99	144	AACf1	no	no	no	no	no
GCF_001051555	NZ_APGT01000053.1	-2	127783	127926	7.800000000000001e-67	0.99	144	AACf1	no	no	no	no	no
GCF_001051615	NZ_APGU01000041.1	3	57597	57740	3.9000000000000005e-67	0.99	144	AACf1	no	no	no	no	no
GCF_001051605	NZ_APGV01000052.1	-1	57530	57673	2.9e-67	0.99	144	AACf1	no	no	no	no	no
GCF_001051625	NZ_APGW01000057.1	1	127843	127986	8.4e-67	0.99	144	AACf1	no	no	no	no	no
GCF_001051635	NZ_APGX01000047.1	-1	25721	25864	3e-67	0.99	144	AACf1	no	no	no	no	no
GCF_001051705	NZ_APGY01000056.1	-1	127844	127987	8.4e-67	0.99	144	AACf1	no	no	no	no	no
GCF_001051695	NZ_APGZ01000053.1	-1	127847	127990	8.6e-67	0.99	144	AACf1	no	no	no	no	no
GCF_001051685	NZ_APHA01000014.1	-2	127845	127988	4.9e-67	0.99	144	AACf1	no	no	no	no	no
GCF_001051715	NZ_APHB01000065.1	-1	127225	127368	7.5e-67	0.99	144	AACf1	no	no	no	no	no
GCF_001051775	NZ_APHD01000193.1	-3	345	488	3.9000000000000005e-67	0.99	144	AACf1	no	no	no	no	no
GCF_001051815	NZ_APHE01000040.1	3	9851	9994	1.3000000000000001e-67	0.99	144	AACf1	no	no	no	no	no
GCF_001051795	NZ_APHF01000090.1	-1	11936	12079	9.7e-68	0.99	144	AACf1	no	no	no	no	no
GCF_001051845	NZ_APHG01000140.1	2	4706	4849	9.3e-68	0.99	144	AACf1	no	no	no	no	no
GCF_000568275	NZ_APHO01000015.1	3	6223	6403	1.3e-103	0.99	181	AACc	no	no	no	no	no	neomycin, sisomicin, dibekacin, tobramycin, netilmicin
GCF_000497555	NZ_APHQ01000009.1	1	30176	30428	1.4e-86	0.95	253	APHf	no	no	no	no	no	streptomycin
GCF_000404045	NZ_APHV01000044.1	1	1235	1497	4.3e-137	0.98	263	APHf	no	no	no	no	no	streptomycin
GCF_000404005	NZ_APIV01000012.1	2	75345	75623	1.1e-96	0.98	279	APHb	no	no	no	no	no
GCF_000601415	NZ_APIX01000039.1	-2	374	517	9.3e-68	0.99	144	AACf1	no	no	no	no	no
GCF_000497675	NZ_APJD01000026.1	1	40810	41067	2.4e-87	0.95	258	APHf	no	no	no	no	no	streptomycin
GCF_000497655	NZ_APJE01000046.1	1	2417	2669	4.8e-88	0.95	253	APHf	no	no	no	no	no	streptomycin
GCF_000497635	NZ_APJF01000012.1	1	2345	2597	3.5e-88	0.95	253	APHf	no	no	no	no	no	streptomycin
GCF_000497615	NZ_APJG01000004.1	2	2401	2653	4e-87	0.95	253	APHf	no	no	no	no	no	streptomycin
GCF_000497595	NZ_APJH01000029.1	1	2345	2597	5.8e-87	0.95	253	APHf	no	no	no	no	no	streptomycin
GCF_000585935	NZ_APMG01000054.1	1	3981	4173	3.3000000000000002e-130	0.99	193	AACe1	yes	no	no	no	yes	kanamycin, netilmicin, dibekacin, amikacin, isepamicin, tobramycin, sisomicin	amikacin
GCF_000497345	NZ_APMW01000008.1	1	405	683	2.1e-155	0.99	279	ANTa	no	no	no	no	yes	streptomycin
GCF_000497365	NZ_APMX01000070.1	3	57	335	4.1e-155	0.99	279	ANTa	no	no	no	no	no	streptomycin
GCF_000406425	NZ_APVO01000124.1	1	174	366	2.0000000000000002e-131	0.99	193	AACe1	yes	no	no	no	yes	isepamicin, netilmicin, tobramycin, sisomicin, dibekacin, kanamycin, amikacin	amikacin
GCF_000406445	NZ_APVP01000058.1	3	350	690	3.8e-249	1.0	341	APHa	yes	no	no	no	no	hygromycin
GCF_000406445	NZ_APVP01000058.1	3	88	166	1.7e-55	0.99	79	AACi	yes	no	no	no	no	tobramycin, dibekacin, sisomicin, netilmicin, amikacin
GCF_000406445	NZ_APVP01000077.1	1	174	366	1.4e-131	0.99	193	AACe1	yes	no	no	no	yes	sisomicin, amikacin, isepamicin, kanamycin, tobramycin, dibekacin, netilmicin
GCF_000406525	NZ_APVQ01000021.1	3	1	192	1.5e-131	0.99	192	AACe1	yes	no	no	no	no	kanamycin, tobramycin, sisomicin, isepamicin, dibekacin, amikacin, netilmicin	amikacin
GCF_000406705	NZ_APVV01000232.1	3	1	192	8.5e-132	0.99	192	AACe1	yes	no	no	no	no	amikacin, tobramycin, netilmicin, dibekacin, sisomicin, isepamicin, kanamycin	amikacin
GCF_000406845	NZ_APVY01000155.1	3	1126	1318	1.1000000000000001e-130	0.99	193	AACe1	yes	no	no	no	yes	kanamycin, isepamicin, netilmicin, tobramycin, dibekacin, sisomicin, amikacin	amikacin
GCF_000406585	NZ_APWA01000122.1	1	174	366	1.9e-131	0.99	193	AACe1	yes	no	no	no	yes	netilmicin, tobramycin, sisomicin, kanamycin, amikacin, dibekacin, isepamicin	amikacin
GCF_000406625	NZ_APWB01000194.1	1	174	366	2.0000000000000002e-131	0.99	193	AACe1	yes	no	no	no	yes	isepamicin, netilmicin, sisomicin, dibekacin, amikacin, kanamycin, tobramycin	amikacin
GCF_000406745	NZ_APWG01000041.1	3	1	192	1.4e-131	0.99	192	AACe1	yes	no	no	no	no	tobramycin, amikacin, kanamycin, netilmicin, isepamicin, dibekacin, sisomicin	amikacin
GCF_000406885	NZ_APWJ01000108.1	3	1126	1318	5.2e-130	0.99	193	AACe1	yes	no	no	no	yes	isepamicin, kanamycin, sisomicin, netilmicin, amikacin, dibekacin, tobramycin	amikacin
GCF_000353585	NZ_APWL01000001.1	-1	439296	439439	1e-67	0.99	144	AACf1	no	no	no	no	no
GCF_000585915	NZ_AQCI01000051.1	1	3982	4174	3.7e-130	0.99	193	AACe1	yes	no	no	no	yes	dibekacin, sisomicin, amikacin, isepamicin, tobramycin, netilmicin, kanamycin	amikacin
GCF_000585955	NZ_AQCJ01000050.1	3	3981	4173	3.9999999999999995e-130	0.99	193	AACe1	yes	no	no	no	yes	sisomicin, kanamycin, netilmicin, tobramycin, isepamicin, amikacin, dibekacin	amikacin
GCF_000385985	NZ_AQGR01000106.1	1	116677	116955	9.6e-155	0.99	279	ANTa	no	no	no	no	no	streptomycin
GCF_000359745	NZ_AQHN01000055.1	2	98207	98462	3.3000000000000003e-80	0.95	256	APHf	no	no	no	no	no	streptomycin
GCF_000406405	NZ_AQOT01000126.1	3	352	692	2.7e-249	1.0	341	APHa	yes	no	no	no	no	hygromycin
GCF_000406405	NZ_AQOT01000126.1	3	90	168	1.2e-55	0.99	79	AACi	yes	no	no	no	no	dibekacin, amikacin, sisomicin, netilmicin, tobramycin
GCF_000633065	NZ_AQPK01000016.1	3	26480	26657	3.1e-109	0.99	178	AACg	no	no	no	no	no	dibekacin, isepamicin, kanamycin, sisomicin, netilmicin, tobramycin, amikacin	amikacin
GCF_000633065	NZ_AQPK01000016.1	2	29259	29532	3.8e-143	1.0	274	ANTa	no	no	no	no	no	streptomycin	streptomycin
GCF_000406385	NZ_AQQD01000059.1	2	138	314	4.1e-123	0.99	177	ANTd	no	no	no	yes	no	kanamycin, sisomicin, tobramycin, gentamicin, dibekacin	gentamicin, kanamycin
GCF_000599925	NZ_AQRD01000001.1	3	38997	39189	3.7e-130	0.99	193	AACe1	yes	no	yes	no	no	dibekacin, netilmicin, kanamycin, isepamicin, amikacin, tobramycin, sisomicin	amikacin
GCF_002705975	NZ_AQRJ01000057.1	1	10386	10690	1.1e-153	0.99	305	APHb	no	no	no	no	no
GCF_002705725	NZ_AQRK01000101.1	3	18865	19165	1.2e-116	0.98	301	APHb	no	no	no	no	no
GCF_002633395	NZ_AQTJ01000033.1	3	65039	65337	1.3000000000000001e-117	0.97	299	APHb	no	no	no	no	no
GCF_000410895	NZ_AQTK01000053.1	-2	57258	57402	4e-43	0.95	145	AACf1	no	no	no	no	no
GCF_000372205	NZ_AQUC01000006.1	2	275820	276081	5.3e-106	0.98	262	AACb	no	no	no	no	no
GCF_000372205	NZ_AQUC01000006.1	2	1007479	1007734	1.8e-76	0.97	256	APHf	no	no	no	no	no
GCF_000371905	NZ_AQUD01000001.1	3	107251	107512	5.2e-101	0.98	262	AACb	no	no	no	no	no
GCF_000371905	NZ_AQUD01000001.1	3	809791	810046	3.7e-74	0.96	256	APHf	no	no	no	no	no
GCF_000371885	NZ_AQUL01000001.1	1	2149141	2149311	2.7e-57	0.98	171	AACc	no	no	no	no	no	netilmicin, dibekacin, tobramycin, sisomicin, neomycin
GCF_000372305	NZ_AQUM01000001.1	1	1352176	1352437	4.6e-103	0.98	262	AACb	no	no	no	no	no
GCF_000372305	NZ_AQUM01000001.1	3	441178	441433	3.3999999999999997e-75	0.97	256	APHf	no	no	no	no	no
GCF_000372105	NZ_AQUN01000001.1	1	947584	947839	5.4e-74	0.96	256	APHf	no	no	no	no	no	streptomycin
GCF_000372345	NZ_AQUS01000301.1	3	35422	35500	1.7e-36	0.98	79	AACi	no	no	no	no	no	netilmicin, amikacin, dibekacin, tobramycin, sisomicin	gentamicin
GCF_000376125	NZ_AQWH01000005.1	2	5103	5368	1.0999999999999999e-116	0.99	266	AACh	yes	no	no	no	no	sisomicin, gentamicin, tobramycin, netilmicin, dibekacin	gentamicin
GCF_000375625	NZ_AQWO01000016.1	1	12711	13015	4.5e-163	1.0	305	APHb	no	no	no	no	no
GCF_000375585	NZ_AQWP01000002.1	2	248777	248855	2.4e-38	0.99	79	AACi	no	no	no	no	no	netilmicin, sisomicin, dibekacin, tobramycin, amikacin	gentamicin
GCF_002109185	NZ_AROK01000151.1	-1	40	235	2.5999999999999997e-129	0.99	196	AACe1	no	no	no	yes	no	amikacin, dibekacin, kanamycin, netilmicin, tobramycin, isepamicin, sisomicin	amikacin
GCF_002109215	NZ_AROO01000095.1	-3	1701	1844	1.3000000000000001e-67	0.99	144	AACf1	no	no	no	no	no
GCF_002109105	NZ_AROP01000014.1	-2	14785	14928	1.9e-67	0.99	144	AACf1	no	no	no	no	no
GCF_002109245	NZ_AROQ01000009.1	-1	14792	14935	1.1e-67	0.99	144	AACf1	no	no	no	no	no
GCF_002109055	NZ_AROS01000013.1	2	14752	14895	1.1e-67	0.99	144	AACf1	no	no	no	no	no
GCF_002109055	NZ_AROS01000174.1	-1	385	725	6.300000000000001e-249	1.0	341	APHa	no	no	no	no	no
GCF_002109055	NZ_AROS01000174.1	-1	123	201	2.2e-55	0.99	79	AACi	no	no	no	no	no
GCF_002109055	NZ_AROS01000189.1	-1	51	246	4e-129	0.99	196	AACe1	yes	no	no	yes	no
GCF_002109125	NZ_AROU01000148.1	-1	5480	5623	1.2e-67	0.99	144	AACf1	no	no	no	no	no
GCF_002109135	NZ_AROV01000173.1	-1	423	618	2.1999999999999997e-129	0.99	196	AACe1	no	no	no	no	yes	tobramycin, amikacin, dibekacin, sisomicin, isepamicin, kanamycin, netilmicin	amikacin
GCF_002191175	NZ_AROX01000118.1	3	5874	6054	7.4e-104	0.99	181	AACc	no	no	no	no	no	neomycin, dibekacin, netilmicin, tobramycin, sisomicin
GCF_000403765	NZ_AROY02000138.1	3	998	1172	1.0999999999999999e-62	0.98	175	AACc	no	no	no	no	yes	netilmicin, sisomicin, neomycin, dibekacin, tobramycin
GCF_000409105	NZ_ARPQ01000096.1	2	353	693	3.5e-249	1.0	341	APHa	yes	no	no	no	no	hygromycin
GCF_000409105	NZ_ARPQ01000096.1	2	91	169	1.4999999999999999e-55	0.99	79	AACi	yes	no	no	no	no	netilmicin, amikacin, tobramycin, dibekacin, sisomicin
GCF_000409125	NZ_ARPR01000239.1	2	20	213	4.6e-128	0.99	194	AACe1	yes	no	no	yes	no	dibekacin, sisomicin, netilmicin, amikacin, kanamycin, tobramycin, isepamicin	amikacin
GCF_000385155	NZ_ARRT01000006.1	1	292918	293180	2.4000000000000002e-106	0.98	263	AACb	no	no	no	no	no
GCF_000385155	NZ_ARRT01000006.1	1	1059233	1059488	4.1999999999999997e-75	0.97	256	APHf	no	no	no	no	no
GCF_000417105	NZ_ARRU01000017.1	3	172	364	1.3e-131	0.99	193	AACe1	yes	no	no	no	yes	dibekacin, isepamicin, sisomicin, amikacin, kanamycin, netilmicin, tobramycin	amikacin
GCF_000417125	NZ_ARRV01000068.1	1	174	366	1.9e-131	0.99	193	AACe1	yes	no	no	no	yes	sisomicin, tobramycin, isepamicin, amikacin, kanamycin, netilmicin, dibekacin	amikacin
GCF_000417305	NZ_ARRW01000078.1	3	352	692	3.3000000000000005e-249	1.0	341	APHa	yes	no	no	no	no	hygromycin
GCF_000417305	NZ_ARRW01000078.1	3	90	168	1.4999999999999999e-55	0.99	79	AACi	yes	no	no	no	no	tobramycin, netilmicin, amikacin, sisomicin, dibekacin
GCF_000417325	NZ_ARRX01000071.1	2	353	693	3.3000000000000005e-249	1.0	341	APHa	yes	no	no	no	no	hygromycin
GCF_000417325	NZ_ARRX01000071.1	2	91	169	1.4999999999999999e-55	0.99	79	AACi	yes	no	no	no	no	dibekacin, tobramycin, sisomicin, netilmicin, amikacin
GCF_000417345	NZ_ARRY01000112.1	3	352	692	3.2e-249	1.0	341	APHa	yes	no	no	no	no	hygromycin
GCF_000417345	NZ_ARRY01000112.1	3	90	168	1.4e-55	0.99	79	AACi	yes	no	no	no	no	amikacin, dibekacin, sisomicin, netilmicin, tobramycin
GCF_000417045	NZ_ARSE01000165.1	3	351	691	3.7000000000000003e-249	1.0	341	APHa	yes	no	no	no	no	hygromycin
GCF_000417045	NZ_ARSE01000165.1	3	89	167	1.5999999999999999e-55	0.99	79	AACi	yes	no	no	no	no	sisomicin, amikacin, netilmicin, dibekacin, tobramycin
GCF_000417165	NZ_ARSI01000080.1	1	174	366	1.3e-131	0.99	193	AACe1	yes	no	no	no	yes	netilmicin, dibekacin, tobramycin, isepamicin, kanamycin, amikacin, sisomicin	amikacin
GCF_000417145	NZ_ARSK01000204.1	3	352	692	4e-249	1.0	341	APHa	yes	no	no	no	no	hygromycin
GCF_000417145	NZ_ARSK01000204.1	3	90	168	1.7999999999999997e-55	0.99	79	AACi	yes	no	no	no	no	amikacin, tobramycin, netilmicin, dibekacin, sisomicin
GCF_000417445	NZ_ARSL01000123.1	1	353	693	2.6000000000000003e-249	1.0	341	APHa	yes	no	no	no	no	hygromycin
GCF_000417445	NZ_ARSL01000123.1	1	91	169	1.1e-55	0.99	79	AACi	yes	no	no	no	no	amikacin, dibekacin, tobramycin, netilmicin, sisomicin
GCF_000417365	NZ_ARSN01000073.1	3	1159	1351	6.3e-131	0.99	193	AACe1	yes	no	no	no	yes	amikacin, isepamicin, sisomicin, dibekacin, tobramycin, netilmicin, kanamycin	amikacin
GCF_000417385	NZ_ARSO01000105.1	3	1	193	6.8e-132	0.99	193	AACe1	yes	no	no	no	no	sisomicin, netilmicin, amikacin, isepamicin, tobramycin, dibekacin, kanamycin	amikacin
GCF_000417405	NZ_ARSP01000024.1	1	174	366	2.0000000000000002e-131	0.99	193	AACe1	yes	no	no	no	yes	isepamicin, netilmicin, sisomicin, dibekacin, tobramycin, amikacin, kanamycin	amikacin
GCF_000408965	NZ_ARVM01000112.1	1	173	365	1.8e-131	0.99	193	AACe1	yes	no	no	no	yes	isepamicin, sisomicin, netilmicin, amikacin, kanamycin, tobramycin, dibekacin	amikacin
GCF_000409045	NZ_ARVQ01000154.1	3	1	192	1.2e-131	0.99	192	AACe1	yes	no	no	no	no	sisomicin, netilmicin, dibekacin, kanamycin, isepamicin, tobramycin, amikacin	amikacin
GCF_000384315	NZ_ARVW01000001.1	2	2289623	2289887	3.3e-54	0.95	265	AACh	no	no	no	no	no
GCF_000384315	NZ_ARVW01000001.1	2	1916758	1916818	1.2e-14	0.96	61	APHe	no	no	no	no	no
GCF_000387405	NZ_ARXZ02000009.1	2	47794	47966	1.4e-49	0.97	173	AACg	no	no	no	no	no	netilmicin, dibekacin, amikacin, sisomicin, isepamicin, tobramycin, kanamycin
GCF_000410835	NZ_ARYD01000022.1	3	634	909	2.3e-133	0.99	276	ANTa	no	no	no	no	no	streptomycin	streptomycin
GCF_000412875	NZ_ARYP01000042.1	-1	203352	203495	1.3e-66	0.99	144	AACf1	no	no	no	no	no
GCF_000412895	NZ_ARYQ01000084.1	1	62809	62952	1.6e-67	0.99	144	AACf1	no	no	no	no	no
GCF_000412915	NZ_ARYR01000025.1	3	56603	56746	1.5e-67	0.99	144	AACf1	no	no	no	no	no
GCF_000412935	NZ_ARYS01000025.1	-1	57315	57458	1.7e-67	0.99	144	AACf1	no	no	no	no	no
GCF_000416295	NZ_ARYT01000045.1	3	53956	54099	2.8e-67	0.99	144	AACf1	no	no	no	no	no
GCF_000412855	NZ_ARYU01000064.1	1	51446	51589	1.3000000000000001e-67	0.99	144	AACf1	no	no	no	no	no
GCF_000412835	NZ_ARYV01000041.1	3	98403	98546	9.9e-68	0.99	144	AACf1	no	no	no	no	no
GCF_000412815	NZ_ARYW01000143.1	3	187727	187870	9.6e-67	0.99	144	AACf1	no	no	no	no	no
GCF_000412795	NZ_ARYX01000071.1	-1	184491	184634	8.3e-67	0.99	144	AACf1	no	no	no	no	no
GCF_000648355	NZ_ARZE01000079.1	-1	2178	2322	1.6e-45	0.95	145	AACf1	no	no	no	no	no
GCF_001445955	NZ_ARZF01000152.1	2	4455	4599	1.5e-46	0.95	145	AACf1	no	no	no	no	no
GCF_001445855	NZ_ARZG01000014.1	2	2527	2671	2.3999999999999997e-46	0.95	145	AACf1	no	no	no	no	no
GCF_001445865	NZ_ARZH01000205.1	2	36973	37117	2e-44	0.95	145	AACf1	no	no	no	no	no
GCF_001445975	NZ_ARZI01000133.1	1	5237	5381	6.5e-46	0.95	145	AACf1	no	no	no	no	no
GCF_001446005	NZ_ARZK01000034.1	-1	4420	4564	4.9e-46	0.95	145	AACf1	no	no	no	no	no
GCF_001446035	NZ_ARZL01000011.1	-2	5126	5270	1.1e-45	0.95	145	AACf1	no	no	no	no	no
GCF_001446055	NZ_ARZM01000059.1	2	4446	4590	6e-46	0.95	145	AACf1	no	no	no	no	no
GCF_001446095	NZ_ARZP01000134.1	3	5118	5262	6.300000000000001e-44	0.95	145	AACf1	no	no	no	no	no
GCF_001445875	NZ_ARZQ01000231.1	1	2563	2707	9.3e-46	0.95	145	AACf1	no	no	no	no	no
GCF_001446125	NZ_ARZU01000029.1	3	5128	5272	2.3e-46	0.95	145	AACf1	no	no	no	no	no
GCF_000411635	NZ_ASAM01000142.1	3	2456	2619	4.5e-81	0.99	164	AACd	no	no	no	no	no
GCF_002759775	NZ_ASAP01000046.1	1	3162	3339	1.1e-108	0.99	178	AACg	no	no	no	no	no	kanamycin, sisomicin, isepamicin, netilmicin, amikacin, dibekacin, tobramycin	amikacin
GCF_002759625	NZ_ASBM01000086.1	2	4276	4414	2.5e-37	0.95	139	AACf1	no	no	no	no	no
GCF_002759695	NZ_ASBN01000037.1	1	1082	1220	8.8e-37	0.96	139	AACf1	no	no	no	no	no
GCF_002759725	NZ_ASBO01000012.1	1	1541	1817	1.4e-169	1.0	277	ANTa	no	no	no	no	no	streptomycin	streptomycin
GCF_002760055	NZ_ASBQ01000014.1	3	1029	1167	3.5e-38	0.96	139	AACf1	no	no	no	no	no
GCF_002760105	NZ_ASBS01000027.1	3	8780	8918	3.6e-37	0.95	139	AACf1	no	no	no	no	no
GCF_002760125	NZ_ASBT01000008.1	3	8780	8918	3.4e-37	0.95	139	AACf1	no	no	no	no	no
GCF_002759675	NZ_ASBU01000004.1	3	3853	4129	1.9e-169	1.0	277	ANTa	no	no	no	no	no
GCF_002759675	NZ_ASBU01000121.1	2	7183	7321	3.6e-37	0.95	139	AACf1	no	no	no	no	no
GCF_002760225	NZ_ASBY01000033.1	3	7562	7739	3.4e-109	0.99	178	AACg	no	no	no	no	yes
GCF_002760225	NZ_ASBY01000033.1	2	6984	7260	6.5e-170	1.0	277	ANTa	no	no	no	no	no
GCF_002760225	NZ_ASBY01000090.1	3	13887	14025	8.8e-37	0.95	139	AACf1	no	no	no	no	no
GCF_002760245	NZ_ASCA01000037.1	3	148	325	2.2000000000000002e-110	0.99	178	AACg	yes	no	no	no	no	tobramycin, sisomicin, kanamycin, amikacin, dibekacin, isepamicin, netilmicin	amikacin
GCF_002760305	NZ_ASCF01000036.1	3	5408	5547	1.1e-35	0.96	140	AACf1	no	no	no	no	no
GCF_002760135	NZ_ASCG01000032.1	1	177	453	1.8e-169	1.0	277	ANTa	no	no	no	no	no
GCF_002760135	NZ_ASCG01000113.1	3	6372	6510	2.3e-37	0.95	139	AACf1	no	no	no	no	no
GCF_000453625	NZ_ASES01000005.1	1	73	252	7.9e-106	0.97	180	AACe1	no	no	no	no	no
GCF_000453625	NZ_ASES01000029.1	2	53	232	2.2000000000000002e-125	1.0	180	AACj	no	no	no	no	no
GCF_000453625	NZ_ASES01000046.1	3	59	219	3.9e-72	0.98	161	AACd	no	no	no	no	yes
GCF_000453605	NZ_ASET01000044.1	3	69	248	5.6e-122	1.0	180	AACj	no	no	no	no	no	netilmicin, dibekacin, neomycin, sisomicin, tobramycin
GCF_000453665	NZ_ASEV01000012.1	1	9	184	2.3e-103	0.99	176	AACa	yes	no	no	no	no	sisomicin, fortimicin, gentamicin
GCF_000453665	NZ_ASEV01000030.1	2	69	248	1e-123	1.0	180	AACj	no	no	no	no	no	tobramycin, dibekacin, sisomicin, neomycin, netilmicin
GCF_000453585	NZ_ASEW01000052.1	2	80	259	1.8e-119	1.0	180	AACj	no	no	no	no	no	sisomicin, neomycin, netilmicin, tobramycin, dibekacin
GCF_000453705	NZ_ASEX01000019.1	2	382	542	4.9e-88	0.99	161	AACd	yes	no	no	yes	no	sisomicin, dibekacin, netilmicin, isepamicin, amikacin, tobramycin, kanamycin
GCF_000453705	NZ_ASEX01000063.1	2	718	897	1e-123	1.0	180	AACj	no	no	no	no	no	netilmicin, sisomicin, dibekacin, neomycin, tobramycin
GCF_000453745	NZ_ASEY01000045.1	1	382	542	2.0000000000000001e-88	0.99	161	AACd	yes	no	no	yes	no	amikacin, tobramycin, netilmicin, sisomicin, isepamicin, kanamycin, dibekacin
GCF_000453645	NZ_ASEZ01000029.1	3	62	241	1.3000000000000001e-123	1.0	180	AACj	no	no	no	no	no	sisomicin, dibekacin, neomycin, netilmicin, tobramycin
GCF_000453565	NZ_ASFA01000057.1	3	68	247	1e-123	1.0	180	AACj	no	no	no	no	no	sisomicin, dibekacin, neomycin, tobramycin, netilmicin
GCF_000453765	NZ_ASFB01000015.1	1	23	198	1.1000000000000001e-101	0.99	176	AACa	yes	no	no	yes	no	gentamicin, fortimicin, sisomicin
GCF_000453765	NZ_ASFB01000088.1	3	83	262	1.8e-119	1.0	180	AACj	no	no	no	no	no	tobramycin, neomycin, dibekacin, netilmicin, sisomicin
GCF_000453785	NZ_ASFC01000130.1	2	16	191	9e-102	0.99	176	AACa	yes	no	no	yes	no	fortimicin, gentamicin, sisomicin	gentamicin
GCF_000453805	NZ_ASFD01000050.1	3	62	241	2.8e-120	1.0	180	AACj	no	no	no	no	no	tobramycin, netilmicin, neomycin, sisomicin, dibekacin
GCF_000453805	NZ_ASFD01000058.1	3	175	350	3.7e-102	0.99	176	AACa	yes	no	no	yes	no	gentamicin, fortimicin, sisomicin
GCF_000453845	NZ_ASFF01000076.1	2	1896	2075	8.5e-124	1.0	180	AACj	no	no	no	no	no	sisomicin, neomycin, dibekacin, tobramycin, netilmicin
GCF_000453865	NZ_ASFG01000001.1	1	75	254	8.3e-124	1.0	180	AACj	no	no	no	no	no	sisomicin, netilmicin, tobramycin, dibekacin, neomycin
GCF_000453905	NZ_ASFI01000051.1	3	1896	2075	9.3e-120	1.0	180	AACj	no	no	no	no	no	dibekacin, netilmicin, neomycin, sisomicin, tobramycin
GCF_000453905	NZ_ASFI01000112.1	3	319	494	3.1e-102	0.99	176	AACa	yes	no	no	no	no	fortimicin, gentamicin, sisomicin
GCF_000453965	NZ_ASFL01000006.1	3	16	192	2.1000000000000002e-126	0.99	177	ANTd	no	no	no	no	no	gentamicin, sisomicin, dibekacin, kanamycin, tobramycin
GCF_000453965	NZ_ASFL01000012.1	2	1896	2075	1.2e-119	1.0	180	AACj	no	no	no	no	no	tobramycin, sisomicin, netilmicin, neomycin, dibekacin
GCF_000453965	NZ_ASFL01000017.1	3	664	835	7.7e-47	0.95	172	AACg	yes	no	no	no	yes	tobramycin, dibekacin, sisomicin, amikacin, kanamycin, netilmicin, isepamicin
GCF_000453965	NZ_ASFL01000041.1	1	178	354	1.3e-126	0.99	177	ANTd	no	no	no	yes	no	dibekacin, kanamycin, tobramycin, gentamicin, sisomicin
GCF_000453985	NZ_ASFM01000019.1	1	1909	2088	1.5e-119	1.0	180	AACj	no	no	no	no	no	neomycin, dibekacin, netilmicin, tobramycin, sisomicin
GCF_000453985	NZ_ASFM01000077.1	3	664	835	9.799999999999999e-47	0.95	172	AACg	yes	no	no	no	yes	netilmicin, isepamicin, amikacin, tobramycin, kanamycin, sisomicin, dibekacin
GCF_000454005	NZ_ASFN01000015.1	3	139	318	2.3e-122	1.0	180	AACj	no	no	no	no	no	netilmicin, neomycin, tobramycin, dibekacin, sisomicin
GCF_000453025	NZ_ASFO01000086.1	2	431	602	8.799999999999999e-47	0.95	172	AACg	no	no	no	no	yes	sisomicin, netilmicin, dibekacin, isepamicin, amikacin, kanamycin, tobramycin
GCF_000453085	NZ_ASFR01000008.1	2	344	536	1.2000000000000002e-130	0.99	193	AACe1	yes	no	no	yes	yes	sisomicin, isepamicin, netilmicin, dibekacin, amikacin, kanamycin, tobramycin	amikacin
GCF_000453145	NZ_ASFU01000039.1	1	589	781	3.2e-131	0.99	193	AACe1	yes	no	no	yes	no	netilmicin, amikacin, kanamycin, tobramycin, isepamicin, sisomicin, dibekacin
GCF_000453145	NZ_ASFU01000047.1	2	1896	2075	9.2e-124	1.0	180	AACj	no	no	no	no	no	tobramycin, neomycin, netilmicin, dibekacin, sisomicin
GCF_000453205	NZ_ASFX01000018.1	2	73	252	5.1e-122	1.0	180	AACj	no	no	no	no	no	dibekacin, sisomicin, netilmicin, neomycin, tobramycin
GCF_000453285	NZ_ASGB01000082.1	3	64	243	1.3000000000000001e-123	1.0	180	AACj	no	no	no	no	no	netilmicin, dibekacin, neomycin, tobramycin, sisomicin
GCF_000453285	NZ_ASGB01000131.1	3	337	529	8.6e-132	0.99	193	AACe1	yes	no	no	no	no	tobramycin, sisomicin, amikacin, dibekacin, kanamycin, isepamicin, netilmicin
GCF_000453305	NZ_ASGC01000085.1	3	22	214	1.1e-132	0.99	193	AACe1	yes	no	no	no	no	dibekacin, amikacin, sisomicin, tobramycin, isepamicin, netilmicin, kanamycin
GCF_000453305	NZ_ASGC01000120.1	1	89	268	2e-113	1.0	180	AACj	no	no	no	no	no	netilmicin, sisomicin, neomycin, tobramycin, dibekacin
GCF_000453325	NZ_ASGD01000139.1	1	88	267	1.6e-113	1.0	180	AACj	no	no	no	no	no	neomycin, sisomicin, tobramycin, netilmicin, dibekacin
GCF_000453345	NZ_ASGE01000044.1	3	176	355	8.100000000000001e-124	1.0	180	AACj	no	no	no	no	no	netilmicin, tobramycin, dibekacin, sisomicin, neomycin
GCF_000453365	NZ_ASGF01000041.1	3	344	536	5.4e-132	0.99	193	AACe1	yes	no	no	no	no	netilmicin, amikacin, isepamicin, sisomicin, tobramycin, kanamycin, dibekacin	amikacin
GCF_000453385	NZ_ASGG01000089.1	1	64	243	1.5000000000000001e-123	1.0	180	AACj	no	no	no	no	no	neomycin, sisomicin, dibekacin, netilmicin, tobramycin
GCF_000453405	NZ_ASGH01000007.1	2	563	755	1.0000000000000001e-131	0.99	193	AACe1	yes	no	no	yes	no	tobramycin, sisomicin, amikacin, netilmicin, dibekacin, kanamycin, isepamicin	amikacin
GCF_000453465	NZ_ASGK01000043.1	1	65	244	4.4e-122	1.0	180	AACj	no	no	no	no	no	sisomicin, neomycin, dibekacin, netilmicin, tobramycin
GCF_000453505	NZ_ASGM01000107.1	2	56	235	9.800000000000001e-124	1.0	180	AACj	no	no	no	no	no	tobramycin, sisomicin, netilmicin, neomycin, dibekacin
GCF_000403115	NZ_ASHS01000073.1	3	53	305	8.5e-184	1.0	253	ANTb	yes	no	no	no	yes	neomycin, kanamycin, amikacin, dibekacin, tobramycin, isepamicin
GCF_000478275	NZ_ASJB01000045.1	3	5232	5406	6.5e-63	0.97	175	AACc	no	no	no	no	no	neomycin, tobramycin, sisomicin, dibekacin, netilmicin
GCF_000517845	NZ_ASPR01000014.1	3	3706	3879	1.2e-50	0.97	174	AACg	no	no	no	no	no	isepamicin, dibekacin, sisomicin, kanamycin, tobramycin, netilmicin, amikacin
GCF_000517885	NZ_ASPT01000074.1	2	8113	8283	1.2999999999999998e-43	0.95	171	AACg	no	no	no	no	no	kanamycin, netilmicin, amikacin, sisomicin, tobramycin, isepamicin, dibekacin
GCF_000517925	NZ_ASPV01000098.1	2	18179	18353	1.4e-44	0.97	175	AACg	no	no	no	no	no	netilmicin, kanamycin, amikacin, tobramycin, dibekacin, isepamicin, sisomicin
GCF_000517945	NZ_ASPW01000048.1	3	12725	12996	1.8e-110	0.97	272	ANTa	no	no	no	no	no	streptomycin
GCF_000517945	NZ_ASPW01000051.1	1	171318	171555	6.3e-41	0.97	238	ANTb	no	no	no	no	no	dibekacin, amikacin, isepamicin, tobramycin, kanamycin, neomycin
GCF_000517985	NZ_ASPY01000022.1	3	1160	1333	5.4e-47	0.97	174	AACg	no	no	no	no	no	tobramycin, kanamycin, dibekacin, netilmicin, isepamicin, amikacin, sisomicin
GCF_000518025	NZ_ASPZ01000065.1	3	670	842	6e-52	0.97	173	AACg	no	no	no	no	no	netilmicin, amikacin, dibekacin, sisomicin, kanamycin, tobramycin, isepamicin
GCF_000414075	NZ_ASQH01000008.1	1	42367	42511	9.100000000000001e-72	0.99	145	AACf1	no	no	no	no	no
GCF_001969965	NZ_ASQP01000057.1	3	6301	6608	1.2e-109	0.97	308	APHb	no	no	no	no	no
GCF_001969965	NZ_ASQP01000319.1	2	19337	19641	6.8e-165	0.99	305	APHb	no	no	no	no	no
GCF_000412395	NZ_ASQV01000100.1	1	5074	5330	6.9e-81	0.95	257	APHf	no	no	no	no	yes	streptomycin
GCF_000506925	NZ_ASRF01000003.1	2	60198	60341	5.2000000000000004e-67	0.99	144	AACf1	no	no	no	no	no
GCF_000401235	NZ_ASRU01000323.1	3	433	599	1.2e-47	0.95	167	AACg	no	no	no	no	no	netilmicin, amikacin, isepamicin, kanamycin, tobramycin, sisomicin, dibekacin
GCF_000520795	NZ_ASRZ01000213.1	1	9123	9400	1.5e-139	0.99	278	ANTa	no	no	no	no	no	streptomycin
GCF_000520795	NZ_ASRZ01000229.1	1	638	913	1.9000000000000002e-74	0.96	276	ANTa	no	no	no	no	no	streptomycin
GCF_000520755	NZ_ASSB01000067.1	3	16424	16700	1.2e-140	0.99	277	ANTa	no	no	no	no	no	streptomycin
GCF_000520755	NZ_ASSB01000392.1	2	1012	1289	2.9999999999999995e-70	0.95	278	ANTa	no	no	no	no	yes	streptomycin
GCF_000520715	NZ_ASSD01000124.1	2	2878	3138	7.399999999999999e-69	0.95	261	ANTa	no	no	no	no	no	streptomycin	streptomycin
GCF_000520695	NZ_ASSE01000173.1	3	1877	2048	1.3e-45	0.96	172	AACg	no	no	no	no	no	sisomicin, netilmicin, tobramycin, dibekacin, amikacin, isepamicin, kanamycin
GCF_000520655	NZ_ASSG01000527.1	1	589	764	3.3e-47	0.99	176	AACg	no	no	no	no	no	amikacin, kanamycin, sisomicin, netilmicin, tobramycin, dibekacin, isepamicin
GCF_000421995	NZ_ASTH01000015.1	3	5163	5340	2.6e-109	0.99	178	AACg	yes	no	yes	no	yes	netilmicin, kanamycin, tobramycin, amikacin, sisomicin, isepamicin, dibekacin
GCF_000421995	NZ_ASTH01000032.1	-1	103	155	6.7e-44	0.99	53	ANTe	yes	no	no	no	no	kanamycin, tobramycin, dibekacin, amikacin, neomycin, isepamicin
GCF_000407365	NZ_ASVU01000002.1	2	68610	68885	2.7000000000000003e-73	0.97	276	ANTa	no	no	no	no	no	streptomycin	streptomycin
GCF_000407425	NZ_ASVZ01000001.1	1	44351	44513	8.7e-61	0.98	163	AACd	no	no	no	no	no
GCF_000407465	NZ_ASWC01000001.1	2	161809	161970	5.2e-56	0.98	162	AACd	no	no	no	no	no
GCF_000407505	NZ_ASWE01000003.1	3	209349	209510	4.8999999999999995e-62	0.98	162	AACd	no	no	no	no	no
GCF_000407505	NZ_ASWE01000004.1	2	117566	117831	1.3e-77	0.96	266	ANTa	no	no	no	no	no
GCF_000407585	NZ_ASWK01000001.1	1	731944	732107	1.7e-61	0.98	164	AACd	no	no	no	no	no
GCF_000407625	NZ_ASWQ01000013.1	2	4459	4719	9.900000000000001e-168	0.99	261	ANTa	yes	no	no	no	yes	streptomycin	streptomycin
GCF_000438765	NZ_ASWX01000007.1	3	7899	8176	6.700000000000001e-80	0.98	278	ANTa	no	no	no	no	no	streptomycin	streptomycin
GCF_000411915	NZ_ASXD01000032.1	2	8638	8780	2.7e-36	0.97	143	AACf1	no	no	no	no	no
GCF_001526565	NZ_ASXZ01000023.1	1	25118	25257	2.1e-52	0.97	140	AACf1	no	no	no	no	no
GCF_001526545	NZ_ASYD01000022.1	1	25118	25257	2.2e-52	0.97	140	AACf1	no	no	no	no	no
GCF_000495995	NZ_ASYH01000052.1	3	71	211	1.9999999999999998e-42	0.97	141	AACf1	no	no	no	no	no	amikacin, dibekacin, tobramycin, kanamycin, sisomicin, netilmicin, isepamicin
GCF_000442355	NZ_ASZO01000001.1	-1	312	564	1.1e-182	1.0	253	ANTb	no	no	yes	no	yes	tobramycin, kanamycin, neomycin, dibekacin, amikacin, isepamicin
GCF_000647595	NZ_ATAJ02000025.1	1	15873	16129	2.8000000000000003e-80	0.95	257	APHf	no	no	no	no	no	streptomycin
GCF_000597925	NZ_ATBG01000029.1	-2	4137	4280	5.7e-54	0.98	144	AACf1	no	no	no	no	no	tobramycin, sisomicin, dibekacin, amikacin, isepamicin, netilmicin, kanamycin
GCF_004014805	NZ_ATDN01000045.1	-3	25683	25859	8.799999999999999e-83	0.99	177	AACc	no	no	no	no	no	sisomicin, tobramycin, dibekacin, neomycin, netilmicin
GCF_001581995	NZ_ATDR01000067.1	-2	34353	34534	7.8e-85	0.99	182	AACc	no	no	no	no	no	neomycin, netilmicin, dibekacin, sisomicin, tobramycin
GCF_000500025	NZ_ATEU01000031.1	-3	224295	224438	7.7e-67	0.99	144	AACf1	no	no	no	no	no
GCF_000439185	NZ_ATEZ01000151.1	2	583	923	4.600000000000001e-249	1.0	341	APHa	no	no	no	no	yes	hygromycin
GCF_000439185	NZ_ATEZ01000151.1	2	321	399	1.9e-55	0.99	79	AACi	no	no	no	no	yes	sisomicin, tobramycin, amikacin, netilmicin, dibekacin
GCF_000439185	NZ_ATEZ01000189.1	2	50	242	1.2e-131	0.99	193	AACe1	yes	no	no	no	no	isepamicin, amikacin, kanamycin, netilmicin, sisomicin, dibekacin, tobramycin
GCF_000416565	NZ_ATFA01000005.1	-3	127954	128097	1.6e-67	0.99	144	AACf1	no	no	no	no	no
GCF_000418575	NZ_ATFQ01000031.1	3	13379	13553	2e-70	0.97	175	AACc	no	no	no	no	no	tobramycin, dibekacin, neomycin, netilmicin, sisomicin
GCF_000418575	NZ_ATFQ01000044.1	-2	159	350	6.400000000000001e-130	0.99	192	AACe1	yes	no	no	yes	no	kanamycin, dibekacin, netilmicin, sisomicin, amikacin, isepamicin, tobramycin
GCF_000413855	NZ_ATGG01000010.1	3	11955	12099	7.4e-72	0.99	145	AACf1	no	no	no	no	no
GCF_000506945	NZ_ATHK01000017.1	-1	44966	45109	2.9e-67	0.99	144	AACf1	no	no	no	no	no
GCF_001582005	NZ_ATHW01000033.1	2	21852	22033	3.8e-85	0.99	182	AACc	no	no	no	no	no	netilmicin, dibekacin, neomycin, tobramycin, sisomicin
GCF_000417805	NZ_ATHY01000046.1	2	348	540	1.9999999999999998e-130	0.99	193	AACe1	yes	no	no	yes	no	dibekacin, kanamycin, tobramycin, amikacin, netilmicin, sisomicin, isepamicin	amikacin
GCF_000417785	NZ_ATHZ01000045.1	3	161	340	4.0000000000000006e-124	1.0	180	AACj	no	no	no	no	no	tobramycin, sisomicin, neomycin, netilmicin, dibekacin
GCF_000417785	NZ_ATHZ01000055.1	2	348	540	2.6e-130	0.99	193	AACe1	yes	no	no	yes	no	dibekacin, tobramycin, kanamycin, isepamicin, netilmicin, amikacin, sisomicin
GCF_000445385	NZ_ATJY01000040.1	-2	10110	10254	1.2e-44	0.95	145	AACf1	no	no	no	no	no
GCF_000482065	NZ_ATKA01000110.1	-2	52	247	7.7e-130	0.99	196	AACe1	yes	no	no	yes	yes	isepamicin, netilmicin, amikacin, dibekacin, sisomicin, kanamycin, tobramycin	amikacin
GCF_000416255	NZ_ATLM01000004.1	1	56820	57075	2.6e-75	0.95	256	APHf	no	no	no	no	no	streptomycin
GCF_000416215	NZ_ATLP01000035.1	-2	32898	33041	3.3e-54	0.98	144	AACf1	no	no	no	no	no
GCF_000442535	NZ_ATMS01000056.1	1	7644	7897	1.0999999999999999e-75	0.98	254	ANTb	no	no	no	no	no	neomycin, dibekacin, isepamicin, tobramycin, amikacin, kanamycin
GCF_000442555	NZ_ATMT01000104.1	3	47313	47566	8.5e-76	0.98	254	ANTb	no	no	no	no	no	neomycin, kanamycin, dibekacin, amikacin, tobramycin, isepamicin
GCF_000419625	NZ_ATTJ01000002.1	3	117421	117588	1.0999999999999999e-69	0.97	168	ANTd	no	no	no	no	no	gentamicin, tobramycin, sisomicin, dibekacin, kanamycin	kanamycin, gentamicin
GCF_000419785	NZ_ATTR01000001.1	3	35509	35587	1.8e-36	0.98	79	AACi	no	no	no	no	no	dibekacin, sisomicin, tobramycin, netilmicin, amikacin
GCF_000419785	NZ_ATTR01000008.1	1	15437	15679	2.4e-76	0.95	243	APHf	no	no	no	no	no	streptomycin
GCF_000420785	NZ_ATVP01000026.1	3	227	503	7.1e-178	1.0	277	ANTa	no	no	no	no	no	streptomycin	streptomycin
GCF_000420965	NZ_ATVY01000019.1	1	982	1246	1.8e-74	0.97	265	ANTa	no	no	no	no	no	streptomycin	streptomycin
GCF_000421045	NZ_ATWC01000025.1	1	8556	8821	4.3e-77	0.96	266	ANTa	no	no	no	no	no	streptomycin	streptomycin
GCF_000444835	NZ_ATWR02000004.1	-3	44405	44548	2.8e-67	0.99	144	AACf1	no	no	no	no	no
GCF_000421445	NZ_ATXA01000012.1	1	20730	20904	8.4e-59	0.97	175	AACc	no	no	no	no	no	tobramycin, sisomicin, neomycin, dibekacin, netilmicin
GCF_000421505	NZ_ATXD01000011.1	2	47890	48168	8.9e-70	0.95	279	ANTa	no	no	no	no	no	streptomycin	streptomycin
GCF_000427465	NZ_ATYB01000014.1	3	737043	737121	3.3e-35	0.99	79	AACi	no	no	no	no	no	sisomicin, netilmicin, tobramycin, amikacin, dibekacin	gentamicin
GCF_000427485	NZ_ATYC01000022.1	1	734069	734147	9.7e-37	0.98	79	AACi	no	no	no	no	no	dibekacin, amikacin, tobramycin, netilmicin, sisomicin	gentamicin
GCF_000427705	NZ_ATYN01000005.1	2	121108	121363	3.7e-76	0.96	256	APHf	no	no	no	no	no	streptomycin
GCF_000427745	NZ_ATYP01000035.1	2	18301	18379	2e-38	0.98	79	AACi	no	no	no	no	no	amikacin, sisomicin, tobramycin, netilmicin, dibekacin	gentamicin
GCF_000427765	NZ_ATYQ01000001.1	3	235196	235451	6.9e-76	0.96	256	APHf	no	no	no	no	no
GCF_000427765	NZ_ATYQ01000009.1	1	93283	93544	2.1e-104	0.98	262	AACb	no	no	no	no	no
GCF_000427785	NZ_ATYR01000004.1	3	68253	68395	3.7e-53	0.97	143	AACf1	no	no	no	no	no	tobramycin, dibekacin, kanamycin, sisomicin, amikacin, isepamicin, netilmicin
GCF_000427885	NZ_ATYW01000015.1	3	50192	50455	9.2e-91	0.98	264	AACb	no	no	no	no	no		gentamicin
GCF_000428065	NZ_ATZF01000010.1	1	37764	38016	1.4e-91	1.0	253	ANTb	no	no	no	no	no	isepamicin, kanamycin, amikacin, tobramycin, neomycin, dibekacin
GCF_000429585	NZ_AUCD01000024.1	1	5854	5996	8.699999999999999e-39	0.98	143	AACf1	no	no	no	no	no	sisomicin, tobramycin, dibekacin, kanamycin, amikacin, netilmicin, isepamicin
GCF_000429625	NZ_AUCF01000037.1	2	13754	14020	4.2e-112	0.99	267	AACh	no	no	no	no	no	gentamicin, netilmicin, dibekacin, sisomicin, tobramycin	gentamicin
GCF_000425885	NZ_AUEH01000043.1	3	7120	7261	2.0000000000000002e-39	0.96	142	AACf1	no	no	no	no	no
GCF_000426065	NZ_AUEQ01000001.1	1	146878	147059	3.5e-91	0.99	182	AACc	no	no	no	no	no	tobramycin, sisomicin, neomycin, dibekacin, netilmicin
GCF_000426285	NZ_AUFB01000005.1	2	11386	11639	2.5e-77	0.96	254	APHf	no	no	no	no	no	streptomycin
GCF_000426325	NZ_AUFD01000024.1	2	9839	9959	1.1999999999999998e-53	0.99	121	AACm	no	no	no	no	no
GCF_000426545	NZ_AUFO01000039.1	1	7220	7391	5.6999999999999995e-46	0.97	172	AACg	no	no	no	no	no	isepamicin, kanamycin, tobramycin, sisomicin, netilmicin, amikacin, dibekacin
GCF_000422985	NZ_AUHC01000005.1	1	22939	23085	1.4e-49	0.96	147	AACf1	no	no	no	no	no
GCF_000423565	NZ_AUIF01000030.1	1	8668	8807	9.5e-38	0.95	140	AACf1	no	no	no	no	no	sisomicin, amikacin, isepamicin, kanamycin, netilmicin, tobramycin, dibekacin
GCF_000423605	NZ_AUIH01000073.1	2	2766	2926	7.1e-65	0.98	161	AACd	no	no	no	no	yes	tobramycin, kanamycin, sisomicin, amikacin, dibekacin, netilmicin, isepamicin
GCF_000423665	NZ_AUIK01000008.1	1	13890	14062	2.6e-55	0.98	173	AACc	no	no	no	no	no	netilmicin, neomycin, dibekacin, sisomicin, tobramycin
GCF_000423765	NZ_AUIP01000021.1	1	8446	8722	2.5e-170	1.0	277	ANTa	no	no	no	no	no	streptomycin	streptomycin
GCF_000423925	NZ_AUIX01000009.1	1	64167	64431	5.6e-58	0.95	265	ANTa	no	no	no	no	no	streptomycin	streptomycin
GCF_000423985	NZ_AUJA01000020.1	2	11884	12149	1.5e-74	0.97	266	ANTa	no	no	no	no	no	streptomycin	streptomycin
GCF_000424145	NZ_AUJI01000031.1	2	12927	13190	2.8e-54	0.96	264	ANTa	no	no	no	no	no	streptomycin	streptomycin
GCF_000424405	NZ_AUJV01000011.1	3	6690	6955	2.3000000000000002e-74	0.97	266	ANTa	no	no	no	no	no	streptomycin	streptomycin
GCF_000424425	NZ_AUJW01000023.1	3	2071	2336	5.7e-75	0.97	266	ANTa	no	no	no	no	no	streptomycin	streptomycin
GCF_000424485	NZ_AUJZ01000006.1	2	66096	66360	8.400000000000001e-57	0.96	265	ANTa	no	no	no	no	no	streptomycin	streptomycin
GCF_000424625	NZ_AUKG01000001.1	1	93491	93669	1e-59	0.98	179	AACc	no	no	no	no	no	netilmicin, tobramycin, sisomicin, dibekacin, neomycin
GCF_000424785	NZ_AUKO01000004.1	3	166959	167228	8.499999999999999e-92	0.98	270	AACb	no	no	no	no	no		gentamicin
GCF_000424945	NZ_AUKV01000015.1	3	3583	3757	3.2e-54	0.97	175	AACc	no	no	no	no	no	neomycin, netilmicin, tobramycin, sisomicin, dibekacin
GCF_000425065	NZ_AULB01000013.1	1	60327	60610	4.3e-129	0.99	284	AACb	no	no	no	no	no
GCF_000422465	NZ_AULV01000014.1	3	19427	19705	3.4e-141	0.99	279	ANTa	no	no	no	no	no	streptomycin	streptomycin
GCF_000430765	NZ_AUMQ01000016.1	3	124759	124929	9.7e-45	0.95	171	AACg	no	no	no	no	no	kanamycin, netilmicin, tobramycin, amikacin, sisomicin, dibekacin, isepamicin
GCF_000430865	NZ_AUMV01000013.1	2	5068	5235	1.5e-69	0.97	168	ANTd	yes	no	no	no	no	kanamycin, gentamicin, dibekacin, sisomicin, tobramycin	gentamicin, kanamycin
GCF_000443145	NZ_AUMY01000009.1	-3	40446	40620	1.9e-69	0.97	175	AACc	no	no	no	no	no	netilmicin, neomycin, sisomicin, dibekacin, tobramycin
GCF_000709575	NZ_AUNH01000394.1	3	6239	6419	7.8e-104	0.99	181	AACc	no	no	no	no	no	dibekacin, sisomicin, tobramycin, netilmicin, neomycin
GCF_000709595	NZ_AUPO01000696.1	3	6231	6411	1.1e-103	0.99	181	AACc	no	no	no	no	no	tobramycin, dibekacin, sisomicin, netilmicin, neomycin
GCF_000443245	NZ_AUPT01000023.1	1	920	1172	1e-183	1.0	253	ANTb	yes	no	no	no	no	tobramycin, neomycin, amikacin, kanamycin, isepamicin, dibekacin
GCF_000443265	NZ_AUPU01000024.1	-2	882	1158	4.4e-114	0.99	277	ANTa	yes	no	no	no	no	streptomycin
GCF_000709615	NZ_AUPX01000337.1	3	6230	6410	6.8e-104	0.99	181	AACc	no	no	no	no	no	tobramycin, sisomicin, dibekacin, netilmicin, neomycin
GCF_000445495	NZ_AUQA01000003.1	2	39567	39843	2.6e-97	0.98	277	ANTa	no	no	no	no	no	streptomycin	streptomycin
GCF_000474415	NZ_AUQF01000049.1	-3	6754	6897	9.2e-68	0.99	144	AACf1	no	no	no	no	no
GCF_000474435	NZ_AUQG01000135.1	-1	581	724	8.299999999999999e-68	0.99	144	AACf1	no	no	no	no	no
GCF_000474455	NZ_AUQJ01000002.1	1	28305	28448	1.6e-67	0.99	144	AACf1	no	no	no	no	no
GCF_003408735	NZ_AUQK01000242.1	1	12332	12475	7.799999999999999e-70	0.99	144	AACf1	no	no	no	no	no
GCF_000474335	NZ_AUQL01000008.1	1	160950	161093	3.9000000000000005e-67	0.99	144	AACf1	no	no	no	no	no
GCF_000474475	NZ_AUQM01000007.1	1	160944	161087	3.6e-67	0.99	144	AACf1	no	no	no	no	no
GCF_000474355	NZ_AUQN01000009.1	3	160992	161135	4.4e-67	0.99	144	AACf1	no	no	no	no	no
GCF_000474495	NZ_AUQO01000064.1	-1	5152	5295	5.899999999999999e-68	0.99	144	AACf1	no	no	no	no	no
GCF_000474515	NZ_AUQP01000001.1	-2	127128	127271	6.8e-67	0.99	144	AACf1	no	no	no	no	no
GCF_000474535	NZ_AUQQ01000001.1	1	127781	127924	6.4e-67	0.99	144	AACf1	no	no	no	no	no
GCF_000474375	NZ_AUQR01000012.1	2	127842	127985	6.1e-67	0.99	144	AACf1	no	no	no	no	no
GCF_003408675	NZ_AUQS01000034.1	-3	59258	59401	1.1e-67	0.99	144	AACf1	no	no	no	no	no
GCF_000474555	NZ_AUQT01000001.1	-1	224450	224593	6.6e-67	0.99	144	AACf1	no	no	no	no	no
GCF_000474555	NZ_AUQT01000040.1	-3	277	562	4.6e-185	1.0	286	AACh	yes	no	no	no	no
GCF_000474395	NZ_AUQU01000034.1	1	58450	58593	2.8e-67	0.99	144	AACf1	no	no	no	no	no
GCF_000474395	NZ_AUQU01000038.1	3	277	562	4.3e-185	1.0	286	AACh	no	no	no	no	no
GCF_000474575	NZ_AUQV01000034.1	2	58509	58652	2.2e-67	0.99	144	AACf1	no	no	no	no	no
GCF_003413805	NZ_AURF01000144.1	2	8280	8423	6.7e-69	0.99	144	AACf1	no	no	no	no	no
GCF_003414035	NZ_AURG01000107.1	-2	8124	8267	8.200000000000001e-67	0.99	144	AACf1	no	no	no	no	no
GCF_003413995	NZ_AURH01000430.1	2	8191	8334	1.4999999999999998e-68	0.99	144	AACf1	no	no	no	no	no
GCF_003413965	NZ_AURI01000030.1	1	45035	45178	1.4999999999999998e-68	0.99	144	AACf1	no	no	no	no	no
GCF_003413985	NZ_AURJ01000123.1	3	6532	6675	3.9e-69	0.99	144	AACf1	no	no	no	no	no
GCF_003413815	NZ_AURK01000038.1	2	8191	8334	2.7e-69	0.99	144	AACf1	no	no	no	no	no
GCF_001682115	NZ_AURM01000001.1	-1	128012	128155	1.6e-66	0.99	144	AACf1	no	no	no	no	no
GCF_003413925	NZ_AURO01000128.1	3	44122	44265	1.3999999999999998e-68	0.99	144	AACf1	no	no	no	no	no
GCF_003413865	NZ_AURS01000010.1	2	15	297	2.2e-128	0.99	283	AACb	yes	no	no	no	no
GCF_003413865	NZ_AURS01000086.1	2	42370	42513	1.2e-68	0.99	144	AACf1	no	no	no	no	no
GCF_000467205	NZ_AURV01000143.1	1	35	228	5.1e-128	0.99	194	AACe1	yes	no	no	yes	no	tobramycin, kanamycin, sisomicin, amikacin, isepamicin, netilmicin, dibekacin	amikacin
GCF_001461765	NZ_AUSY01000050.1	1	5145	5412	9e-145	0.99	268	AACh	no	no	no	no	no	sisomicin, netilmicin, dibekacin, gentamicin, tobramycin	gentamicin
GCF_001461705	NZ_AUTA01000073.1	2	16096	16240	2.4e-55	0.97	145	AACf1	no	no	no	no	no	dibekacin, kanamycin, amikacin, netilmicin, sisomicin, isepamicin, tobramycin
GCF_000709655	NZ_AUTG01000454.1	1	6234	6414	8.300000000000001e-104	0.99	181	AACc	no	no	no	no	no	tobramycin, netilmicin, dibekacin, sisomicin, neomycin
GCF_000465195	NZ_AUVD01000009.1	-2	49332	49475	1.9e-67	0.99	144	AACf1	no	no	no	no	no
GCF_000363915	NZ_AUVF01000007.1	-3	97500	97674	6.9e-70	0.97	175	AACc	no	no	no	no	no	dibekacin, netilmicin, tobramycin, neomycin, sisomicin
GCF_000454565	NZ_AUVI01000120.1	3	5167	5311	2.3e-45	0.95	145	AACf1	no	no	no	no	no
GCF_000454625	NZ_AUVJ01000187.1	-1	5553	5697	4.5e-45	0.95	145	AACf1	no	no	no	no	no
GCF_000454605	NZ_AUVK01000025.1	3	5167	5311	3.0999999999999997e-46	0.95	145	AACf1	no	no	no	no	no
GCF_000454645	NZ_AUVL01000153.1	-3	5218	5362	5.7e-45	0.95	145	AACf1	no	no	no	no	no
GCF_000454585	NZ_AUVM01000071.1	3	5167	5311	3.2999999999999997e-46	0.95	145	AACf1	no	no	no	no	no
GCF_000454665	NZ_AUVN01000127.1	2	5553	5697	1.4e-45	0.95	145	AACf1	no	no	no	no	no
GCF_000454705	NZ_AUVO01000143.1	-2	5237	5381	4.0000000000000006e-45	0.95	145	AACf1	no	no	no	no	no
GCF_000454685	NZ_AUVP01000008.1	3	20743	20887	4.8e-45	0.95	145	AACf1	no	no	no	no	no
GCF_000441955	NZ_AUWL01000108.1	1	559	734	2.5e-101	0.99	176	AACa	no	no	no	yes	yes	sisomicin, fortimicin, gentamicin	gentamicin
GCF_000455145	NZ_AUWS01000045.1	3	18961	19141	4.2e-88	0.99	181	AACc	no	no	no	no	no	dibekacin, netilmicin, sisomicin, tobramycin, neomycin
GCF_000455165	NZ_AUWT01000028.1	-3	13255	13435	1.1e-74	0.98	181	AACc	no	no	no	no	no	neomycin, tobramycin, netilmicin, dibekacin, sisomicin
GCF_000477575	NZ_AUWV01000309.1	1	147	324	6.4e-110	0.99	178	AACg	yes	no	no	no	no	kanamycin, dibekacin, tobramycin, sisomicin, isepamicin, amikacin, netilmicin	amikacin
GCF_000477575	NZ_AUWV01000393.1	1	1	255	9.499999999999999e-166	1.0	255	ANTa	no	no	no	no	no	streptomycin	streptomycin
GCF_000477595	NZ_AUWW01000060.1	3	2506	2669	7.9e-81	0.99	164	AACd	no	no	no	no	yes
GCF_000477595	NZ_AUWW01000197.1	1	1	249	3.3e-160	1.0	249	ANTa	yes	no	no	no	no
GCF_000442045	NZ_AUWX01000268.1	2	1	250	3.3000000000000002e-161	1.0	250	ANTa	yes	no	no	no	no	streptomycin	streptomycin
GCF_000442045	NZ_AUWX01000309.1	2	146	323	5.6e-110	0.99	178	AACg	yes	no	no	no	no	kanamycin, dibekacin, amikacin, netilmicin, tobramycin, isepamicin, sisomicin	amikacin
GCF_000468255	NZ_AUXE01000001.1	-2	58486	58629	2.8e-67	0.99	144	AACf1	no	no	no	no	no
GCF_000468255	NZ_AUXE01000057.1	2	57	342	3.3e-185	1.0	286	AACh	yes	no	no	no	no
GCF_000688355	NZ_AUXR01000004.1	-1	201413	201556	2.3e-67	0.99	144	AACf1	no	no	no	no	no
GCF_000452965	NZ_AVAJ01000090.1	-2	4390	4534	1.1e-45	0.95	145	AACf1	no	no	no	no	no
GCF_000452945	NZ_AVAK01000054.1	-3	5554	5698	5.200000000000001e-44	0.95	145	AACf1	no	no	no	no	no
GCF_000452985	NZ_AVAL01000019.1	1	4461	4605	1.0000000000000001e-45	0.95	145	AACf1	no	no	no	no	no
GCF_000453005	NZ_AVAM01000037.1	-2	4431	4575	4.4e-44	0.95	145	AACf1	no	no	no	no	no
GCF_000474635	NZ_AVAN01000028.1	1	891	1083	3.5e-131	0.99	193	AACe1	no	no	no	yes	no	netilmicin, amikacin, sisomicin, kanamycin, isepamicin, tobramycin, dibekacin	amikacin
GCF_000500125	NZ_AVAP01000153.1	-1	5092	5420	3.4e-202	1.0	329	APHd1	no	no	no	no	no	spectinomycin
GCF_000480335	NZ_AVBB01000415.1	3	6266	6532	4.9e-102	0.98	267	ANTa	no	no	no	no	no	streptomycin	streptomycin
GCF_002200915	NZ_AVCW01000001.1	3	53894	54036	4.3e-50	0.98	143	AACf1	no	no	no	no	no	sisomicin, isepamicin, amikacin, tobramycin, kanamycin, dibekacin, netilmicin
GCF_002200865	NZ_AVDA01000036.1	2	534	674	2.8e-52	0.96	141	AACf1	no	no	no	no	no	tobramycin, amikacin, dibekacin, sisomicin, isepamicin, netilmicin, kanamycin
GCF_000477395	NZ_AVEZ01000047.1	1	10197	10460	6e-101	0.97	264	ANTa	no	no	no	no	no	streptomycin	streptomycin
GCF_000495875	NZ_AVFC01000089.1	1	1799	1991	1.9000000000000003e-130	0.99	193	AACe1	yes	no	no	no	no	amikacin, sisomicin, dibekacin, kanamycin, isepamicin, tobramycin, netilmicin	amikacin
GCF_000495895	NZ_AVFD01000033.1	1	174	366	1.5e-131	0.99	193	AACe1	yes	no	no	no	no	tobramycin, amikacin, isepamicin, dibekacin, netilmicin, kanamycin, sisomicin	amikacin
GCF_000449785	NZ_AVIM01000110.1	3	21713	21889	2.3e-103	0.99	177	AACg	no	no	yes	no	yes	kanamycin, netilmicin, dibekacin, amikacin, isepamicin, sisomicin, tobramycin
GCF_000450945	NZ_AVLM01000086.1	1	194	467	3e-143	1.0	274	ANTa	no	no	no	no	yes	streptomycin	streptomycin
GCF_000450985	NZ_AVMC01000064.1	1	18518	18792	3.6e-60	0.95	275	ANTa	no	no	no	no	no	streptomycin	streptomycin
GCF_000451745	NZ_AVMD01000031.1	1	352	625	5.4e-143	1.0	274	ANTa	no	no	no	no	no	streptomycin	streptomycin
GCF_000455845	NZ_AVNJ01000008.1	3	17122	17397	3.3999999999999996e-69	0.95	276	ANTa	no	no	no	no	no	streptomycin	streptomycin
GCF_000516575	NZ_AVOB01000028.1	2	67	246	1.4e-122	1.0	180	AACj	no	no	no	no	no	tobramycin, netilmicin, sisomicin, neomycin, dibekacin
GCF_000516595	NZ_AVOC01000002.1	3	728	907	8.4e-124	1.0	180	AACj	no	no	no	no	no	netilmicin, neomycin, sisomicin, dibekacin, tobramycin
GCF_000516635	NZ_AVOD01000004.1	1	1890	2069	1.6e-122	1.0	180	AACj	no	no	no	no	no	netilmicin, dibekacin, neomycin, tobramycin, sisomicin
GCF_000465675	NZ_AVOV01000046.1	-3	40648	40976	2.5000000000000003e-201	1.0	329	APHd1	no	no	no	no	no	spectinomycin
GCF_000465695	NZ_AVOW01000002.1	-3	11923	12251	4.4e-202	1.0	329	APHd1	no	no	no	no	no	spectinomycin
GCF_000465695	NZ_AVOW01000012.1	3	2845	3120	2.9e-69	0.95	276	ANTa	no	no	no	no	no	streptomycin
GCF_000474765	NZ_AVOY01000110.1	3	25193	25335	1.1e-55	0.95	143	AACf1	no	no	no	no	no
GCF_000474765	NZ_AVOY01000111.1	2	648	790	4.5e-56	0.95	143	AACf1	no	no	no	no	no
GCF_000681475	NZ_AVPA01000020.1	3	217	394	5.5000000000000006e-111	0.99	178	AACg	yes	no	no	no	yes	isepamicin, kanamycin, dibekacin, netilmicin, sisomicin, tobramycin, amikacin	amikacin
GCF_000775605	NZ_AVPF01000032.1	3	8346	8519	1.5e-48	0.97	174	AACg	no	no	no	no	no	sisomicin, kanamycin, dibekacin, amikacin, netilmicin, isepamicin, tobramycin
GCF_001951035	NZ_AVPO01000006.1	3	59	238	8.5e-124	1.0	180	AACj	no	no	no	no	no	tobramycin, sisomicin, neomycin, netilmicin, dibekacin
GCF_000465595	NZ_AVQG01000056.1	-2	67671	67909	9.6e-76	0.95	239	APHf	no	no	no	no	no	streptomycin
GCF_000465615	NZ_AVSR01000023.1	2	32894	33037	4.900000000000001e-59	0.98	144	AACf1	no	no	no	no	no
GCF_000464685	NZ_AWEO01000048.1	1	5142	5286	6.9e-46	0.95	145	AACf1	no	no	no	no	no
GCF_000465915	NZ_AWES01000018.1	2	13616	13891	8.9e-70	0.95	276	ANTa	no	no	no	no	no	streptomycin
GCF_000465915	NZ_AWES01000078.1	-2	42449	42777	4.8e-202	1.0	329	APHd1	no	no	no	no	no	spectinomycin
GCF_000465835	NZ_AWEU01000023.1	2	119629	119768	1.1e-51	0.96	140	AACf1	no	no	no	no	no
GCF_000565365	NZ_AWGN01000066.1	-3	485	629	4.8e-45	0.95	145	AACf1	no	no	no	no	no
GCF_000565405	NZ_AWGP01000064.1	-1	498	642	2.1e-45	0.95	145	AACf1	no	no	no	no	no
GCF_000565425	NZ_AWGQ01000004.1	-1	529	673	4.6e-45	0.95	145	AACf1	no	no	no	no	no
GCF_000565445	NZ_AWGR01000096.1	-3	484	628	1.9e-45	0.95	145	AACf1	no	no	no	no	no
GCF_000565465	NZ_AWGS01000004.1	-3	485	629	2.3e-45	0.95	145	AACf1	no	no	no	no	no
GCF_000699125	NZ_AWGV01000373.1	3	481	620	6.799999999999999e-53	0.97	140	AACf1	no	no	no	no	no
GCF_000471685	NZ_AWNM01000018.1	2	24603	24740	6.1e-52	0.95	138	AACf1	no	no	no	no	no
GCF_000465535	NZ_AWOI01000032.1	-1	27596	27739	3.6e-67	0.99	144	AACf1	no	no	no	no	no
GCF_000499865	NZ_AWOM01000049.1	3	352	692	3.9000000000000004e-249	1.0	341	APHa	yes	no	no	no	no	hygromycin
GCF_000499865	NZ_AWOM01000049.1	3	90	168	1.3e-55	0.99	79	AACi	yes	no	no	no	no	tobramycin, dibekacin, netilmicin, amikacin, sisomicin
GCF_000499865	NZ_AWOM01000062.1	2	40	233	3.1e-128	0.99	194	AACe1	yes	no	no	yes	no	sisomicin, isepamicin, kanamycin, amikacin, dibekacin, netilmicin, tobramycin
GCF_000498935	NZ_AWOQ01000684.1	1	632	931	4.3e-150	0.99	300	APHb	no	no	no	no	no
GCF_000472005	NZ_AWOW01000004.1	3	391	570	8.699999999999999e-102	1.0	180	AACj	no	no	no	no	no	netilmicin, neomycin, dibekacin, tobramycin, sisomicin
GCF_000468235	NZ_AWQT01000200.1	-2	479	807	1.1e-202	1.0	329	APHd1	no	no	no	no	no	spectinomycin
GCF_000468235	NZ_AWQT01000297.1	1	2148	2423	9.699999999999999e-70	0.95	276	ANTa	no	no	no	no	no	streptomycin
GCF_001951455	NZ_AWRC01000042.1	-2	10496	10776	1e-123	0.99	281	AACb	yes	no	no	yes	no		gentamicin
GCF_001951625	NZ_AWRD01000004.1	1	24161	24441	2.1000000000000003e-123	0.99	281	AACb	yes	no	yes	yes	no		gentamicin
GCF_001951445	NZ_AWRG01000012.1	3	130889	131032	2.7e-67	0.99	144	AACf1	no	no	no	no	no
GCF_001951445	NZ_AWRG01000065.1	3	24159	24439	1.5000000000000001e-123	0.99	281	AACb	yes	no	yes	yes	no
GCF_001951375	NZ_AWRJ01000103.1	2	302	478	3.6e-125	0.99	177	ANTd	yes	no	no	yes	no	dibekacin, kanamycin, tobramycin, gentamicin, sisomicin	kanamycin, gentamicin
GCF_001951595	NZ_AWRM01000064.1	-2	126705	126848	6.2e-67	0.99	144	AACf1	no	no	no	no	no
GCF_001951385	NZ_AWRN01000024.1	-1	24161	24441	2.1000000000000003e-123	0.99	281	AACb	yes	no	yes	yes	no		gentamicin
GCF_001951515	NZ_AWRO01000029.1	1	24159	24439	2.2e-123	0.99	281	AACb	yes	no	yes	yes	no		gentamicin
GCF_001951465	NZ_AWRP01000001.1	3	24159	24439	2.3000000000000002e-123	0.99	281	AACb	yes	no	yes	yes	no		gentamicin
GCF_001952135	NZ_AWRR01000001.1	2	11309	11589	9.800000000000001e-124	0.99	281	AACb	yes	no	no	yes	no		gentamicin
GCF_004936705	NZ_AWRS01000029.1	-1	11296	11576	1.1e-123	0.99	281	AACb	yes	no	no	yes	no		gentamicin
GCF_000497245	NZ_AWTC01000004.1	2	33228	33370	1.4e-42	0.97	143	AACf1	no	no	no	no	no	tobramycin, netilmicin, amikacin, dibekacin, sisomicin, isepamicin, kanamycin
GCF_000497245	NZ_AWTC01000005.1	2	70709	70983	5.6000000000000005e-89	0.97	275	ANTa	no	no	no	no	no	streptomycin
GCF_000499205	NZ_AWUK01000001.1	1	29696	29867	9.9e-51	0.97	172	AACg	no	no	no	no	no	amikacin, sisomicin, isepamicin, tobramycin, dibekacin, kanamycin, netilmicin
GCF_000499945	NZ_AWWO01000016.1	3	2489	2652	1.9000000000000002e-80	0.99	164	AACd	no	no	no	no	no
GCF_000472465	NZ_AXAK01000011.1	1	453	706	4e-140	0.99	254	AACh	no	no	no	no	no	tobramycin, dibekacin, sisomicin, gentamicin, netilmicin	gentamicin
GCF_000472865	NZ_AXAP01000045.1	1	8612	8869	2e-85	0.95	258	APHf	no	no	no	no	no	streptomycin
GCF_000504065	NZ_AXDB02000100.1	1	4438	4612	2.1e-62	0.98	175	AACc	no	no	no	no	no	netilmicin, neomycin, tobramycin, dibekacin, sisomicin
GCF_000500655	NZ_AXDS01000035.1	-2	5020	5164	3.2e-45	0.95	145	AACf1	no	no	no	no	no
GCF_000474865	NZ_AXLE01000002.1	3	758	950	1.9e-131	0.99	193	AACe1	yes	no	no	no	no	sisomicin, netilmicin, amikacin, dibekacin, tobramycin, kanamycin, isepamicin	amikacin
GCF_000474905	NZ_AXLF01000003.1	2	686629	686821	8.6e-129	0.99	193	AACe1	no	no	no	no	no	kanamycin, sisomicin, netilmicin, amikacin, isepamicin, dibekacin, tobramycin
GCF_000474905	NZ_AXLF01000005.1	2	4695	5035	2.8000000000000004e-249	1.0	341	APHa	yes	no	no	no	yes	hygromycin
GCF_000474905	NZ_AXLF01000005.1	2	4433	4511	7.799999999999999e-56	0.99	79	AACi	yes	no	no	no	yes	netilmicin, tobramycin, sisomicin, dibekacin, amikacin
GCF_000474905	NZ_AXLF01000005.1	3	2054	2246	8.6e-131	0.99	193	AACe1	yes	no	no	no	yes	netilmicin, kanamycin, isepamicin, tobramycin, amikacin, dibekacin, sisomicin
GCF_000474905	NZ_AXLF01000006.1	3	1027	1219	3.7e-131	0.99	193	AACe1	yes	no	no	no	no	dibekacin, tobramycin, isepamicin, netilmicin, kanamycin, sisomicin, amikacin
GCF_000474905	NZ_AXLF01000006.1	2	6680	6872	3.7e-131	0.99	193	AACe1	yes	no	no	no	yes	kanamycin, netilmicin, amikacin, isepamicin, dibekacin, sisomicin, tobramycin
GCF_000474825	NZ_AXLI01000004.1	2	23497	23765	4.9e-153	1.0	269	AACh	no	yes	no	no	yes	dibekacin, gentamicin, tobramycin, netilmicin, sisomicin	gentamicin
GCF_000474825	NZ_AXLI01000004.1	3	22606	22789	6.7e-104	0.98	184	AACe1	no	yes	no	yes	yes	netilmicin, sisomicin, gentamicin, tobramycin, dibekacin, kanamycin	gentamicin
GCF_000474785	NZ_AXLK01000004.1	3	43322	43514	2.2000000000000003e-130	0.99	193	AACe1	no	no	no	yes	no	netilmicin, tobramycin, isepamicin, sisomicin, dibekacin, kanamycin, amikacin	amikacin
GCF_000474785	NZ_AXLK01000007.1	3	50698	50966	7.2e-153	1.0	269	AACh	no	no	no	no	yes	netilmicin, tobramycin, gentamicin, dibekacin, sisomicin	gentamicin
GCF_000474785	NZ_AXLK01000007.1	1	49808	49991	4e-103	0.98	184	AACe1	no	no	no	yes	yes	netilmicin, sisomicin, tobramycin, gentamicin, dibekacin, kanamycin	gentamicin
GCF_000482385	NZ_AXVD01000003.1	3	64220	64363	2e-48	0.95	144	AACf1	no	no	no	no	no
GCF_000482765	NZ_AXWR01000002.1	1	49739	49879	8.5e-48	0.97	141	AACf1	no	no	no	no	no
GCF_000689555	NZ_AXZX01000099.1	-3	1677	1914	9.999999999999999e-64	0.96	238	APHf	no	no	no	no	yes	streptomycin
GCF_000689575	NZ_AXZY01000057.1	2	326	502	1.8e-102	0.98	177	AACe1	no	no	no	no	no
GCF_000689575	NZ_AXZY01000298.1	1	1557	1794	3.1e-63	0.96	238	APHf	no	no	no	no	no
GCF_000689595	NZ_AXZZ01000063.1	-2	5914	6152	2.3e-66	0.96	239	APHf	no	no	no	no	no	streptomycin
GCF_000484255	NZ_AYCL01000055.1	-2	162037	162180	1.8e-67	0.99	144	AACf1	no	no	no	no	no
GCF_000484135	NZ_AYCM01000039.1	3	59376	59519	6.6e-68	0.99	144	AACf1	no	no	no	no	no
GCF_000484075	NZ_AYCR01000013.1	-3	385	528	1.7999999999999998e-68	0.99	144	AACf1	no	no	no	no	no
GCF_000483895	NZ_AYCS01000056.1	-3	17348	17491	9.1e-68	0.99	144	AACf1	no	no	no	no	no
GCF_000484115	NZ_AYCT01000050.1	1	162011	162154	1.3000000000000001e-67	0.99	144	AACf1	no	no	no	no	no
GCF_000484415	NZ_AYCU01000038.1	2	53653	53796	5.699999999999999e-68	0.99	144	AACf1	no	no	no	no	no
GCF_000484375	NZ_AYCV01000057.1	1	21957	22100	6.2e-68	0.99	144	AACf1	no	no	no	no	no
GCF_000484395	NZ_AYCW01000058.1	3	162035	162178	1.9e-67	0.99	144	AACf1	no	no	no	no	no
GCF_000484055	NZ_AYCX01000031.1	2	12003	12146	3.1e-68	0.99	144	AACf1	no	no	no	no	no
GCF_000483875	NZ_AYCY01000067.1	-3	8645	8788	1.2e-68	0.99	144	AACf1	no	no	no	no	no
GCF_000483855	NZ_AYCZ01000054.1	-1	12653	12796	1.2e-68	0.99	144	AACf1	no	no	no	no	no
GCF_000484295	NZ_AYDA01000044.1	-3	80802	80945	1.1e-66	0.99	144	AACf1	no	no	no	no	no
GCF_000494345	NZ_AYDB01000019.1	-1	17446	17589	1.3999999999999998e-68	0.99	144	AACf1	no	no	no	no	no
GCF_000494405	NZ_AYDC01000021.1	-2	6626	6769	7.3e-69	0.99	144	AACf1	no	no	no	no	no
GCF_000494505	NZ_AYDD01000002.1	-3	1023	1166	6e-68	0.99	144	AACf1	no	no	no	no	no
GCF_000494325	NZ_AYDE01000006.1	-2	17494	17637	2.0999999999999997e-68	0.99	144	AACf1	no	no	no	no	no
GCF_000494425	NZ_AYDF01000015.1	-2	375	518	2.8999999999999996e-68	0.99	144	AACf1	no	no	no	no	no
GCF_000494445	NZ_AYDI01000011.1	-2	7920	8063	9.3e-68	0.99	144	AACf1	no	no	no	no	no
GCF_000494365	NZ_AYDJ01000013.1	-2	3512	3655	2.6e-68	0.99	144	AACf1	no	no	no	no	no
GCF_000483995	NZ_AYDO01000084.1	3	60089	60232	5.2999999999999995e-68	0.99	144	AACf1	no	no	no	no	no
GCF_000483915	NZ_AYDP01000169.1	-1	7866	8009	1.6e-68	0.99	144	AACf1	no	no	no	no	no
GCF_000484015	NZ_AYDQ01000073.1	1	162006	162149	1.7e-67	0.99	144	AACf1	no	no	no	no	no
GCF_000483975	NZ_AYDS01000026.1	-2	58237	58380	7.499999999999999e-68	0.99	144	AACf1	no	no	no	no	no
GCF_000484355	NZ_AYDT01000025.1	-1	649	792	4.7e-69	0.99	144	AACf1	no	no	no	no	no
GCF_000484335	NZ_AYDU01000035.1	1	19369	19512	6.3e-68	0.99	144	AACf1	no	no	no	no	no
GCF_000484315	NZ_AYDV01000021.1	-1	15849	15992	2.5e-68	0.99	144	AACf1	no	no	no	no	no
GCF_000483795	NZ_AYDX01000060.1	-1	607	750	1.3e-68	0.99	144	AACf1	no	no	no	no	no
GCF_000483835	NZ_AYDY01000019.1	2	7114	7257	1e-68	0.99	144	AACf1	no	no	no	no	no
GCF_000483735	NZ_AYDZ01000008.1	-2	27300	27443	4.099999999999999e-68	0.99	144	AACf1	no	no	no	no	no
GCF_000483775	NZ_AYEA01000042.1	-1	57386	57529	6.8999999999999995e-68	0.99	144	AACf1	no	no	no	no	no
GCF_000483955	NZ_AYEB01000008.1	2	5772	5915	4.099999999999999e-68	0.99	144	AACf1	no	no	no	no	no
GCF_000483755	NZ_AYEC01000075.1	-1	8204	8347	2.6e-68	0.99	144	AACf1	no	no	no	no	no
GCF_000483675	NZ_AYED01000057.1	1	619	762	2.2999999999999998e-69	0.99	144	AACf1	no	no	no	no	no
GCF_000484475	NZ_AYEG01000068.1	1	5913	6056	1.1e-68	0.99	144	AACf1	no	no	no	no	no
GCF_000494485	NZ_AYEI01000137.1	-2	3336	3479	1.4999999999999998e-68	0.99	144	AACf1	no	no	no	no	no
GCF_000484435	NZ_AYEJ01000056.1	1	60098	60241	4.5e-68	0.99	144	AACf1	no	no	no	no	no
GCF_000516035	NZ_AYEW01000073.1	2	340	532	2.9000000000000004e-130	0.99	193	AACe1	yes	no	no	yes	no	isepamicin, dibekacin, sisomicin, amikacin, tobramycin, netilmicin, kanamycin	amikacin
GCF_000516015	NZ_AYEX01000081.1	3	335	527	2.2000000000000003e-130	0.99	193	AACe1	yes	no	no	yes	no	netilmicin, amikacin, isepamicin, dibekacin, kanamycin, sisomicin, tobramycin
GCF_000516015	NZ_AYEX01000091.1	3	62	241	1.1e-123	1.0	180	AACj	no	no	no	no	no	dibekacin, neomycin, sisomicin, tobramycin, netilmicin
GCF_000515995	NZ_AYEY01000140.1	3	327	519	3.9999999999999995e-130	0.99	193	AACe1	yes	no	no	yes	no	amikacin, netilmicin, isepamicin, tobramycin, kanamycin, sisomicin, dibekacin	amikacin
GCF_000515875	NZ_AYEZ01000057.1	1	47	226	1.5000000000000001e-123	1.0	180	AACj	no	no	no	no	no	tobramycin, netilmicin, dibekacin, sisomicin, neomycin
GCF_000515975	NZ_AYFA01000114.1	2	328	520	2.1e-130	0.99	193	AACe1	yes	no	no	yes	no	kanamycin, amikacin, netilmicin, isepamicin, sisomicin, dibekacin, tobramycin	amikacin
GCF_000516375	NZ_AYFE01000065.1	2	467	752	4.9000000000000004e-186	1.0	286	AACh	yes	no	no	no	no	netilmicin, gentamicin, sisomicin, dibekacin, tobramycin
GCF_000516375	NZ_AYFE01000180.1	2	27	198	5.9e-48	0.95	172	AACg	no	no	no	no	no	amikacin, netilmicin, sisomicin, kanamycin, dibekacin, isepamicin, tobramycin
GCF_000516335	NZ_AYFG01000190.1	3	53	232	2.4e-125	1.0	180	AACj	no	no	no	no	no	netilmicin, tobramycin, dibekacin, sisomicin, neomycin
GCF_000516315	NZ_AYFH01000054.1	2	33	204	6.3e-47	0.95	172	AACg	no	no	no	no	yes	dibekacin, isepamicin, amikacin, netilmicin, tobramycin, sisomicin, kanamycin
GCF_000516315	NZ_AYFH01000145.1	2	473	758	9.7e-186	1.0	286	AACh	yes	no	no	no	no	sisomicin, gentamicin, netilmicin, dibekacin, tobramycin
GCF_000516295	NZ_AYFI01000005.1	2	1	171	1.9e-99	0.99	171	AACa	yes	no	no	yes	no	gentamicin, fortimicin, sisomicin	gentamicin
GCF_000516275	NZ_AYFJ01000030.1	1	33	318	1.2e-186	1.0	286	AACh	yes	no	no	no	no	dibekacin, tobramycin, gentamicin, sisomicin, netilmicin	gentamicin
GCF_000516255	NZ_AYFK01000044.1	3	129	308	1.5000000000000002e-124	1.0	180	AACj	no	no	no	no	no	sisomicin, dibekacin, tobramycin, netilmicin, neomycin
GCF_000516235	NZ_AYFL01000043.1	3	56	235	9.2e-124	1.0	180	AACj	no	no	no	no	no	neomycin, tobramycin, dibekacin, sisomicin, netilmicin
GCF_000516215	NZ_AYFM01000092.1	2	55	234	2.5e-123	1.0	180	AACj	no	no	no	no	no	tobramycin, netilmicin, dibekacin, sisomicin, neomycin
GCF_000516195	NZ_AYFN01000028.1	2	328	520	3.1e-130	0.99	193	AACe1	yes	no	no	yes	no	kanamycin, dibekacin, tobramycin, sisomicin, amikacin, netilmicin, isepamicin	amikacin
GCF_000516175	NZ_AYFO01000084.1	1	339	531	2.1e-130	0.99	193	AACe1	yes	no	no	yes	no	sisomicin, amikacin, netilmicin, isepamicin, kanamycin, tobramycin, dibekacin	amikacin
GCF_000516135	NZ_AYFQ01000015.1	2	589	765	1.7000000000000001e-125	0.99	177	ANTd	yes	no	no	yes	no	tobramycin, dibekacin, gentamicin, sisomicin, kanamycin	gentamicin, kanamycin
GCF_000517505	NZ_AYFR01000061.1	1	47	226	3.9e-124	1.0	180	AACj	no	no	no	no	yes	netilmicin, tobramycin, dibekacin, neomycin, sisomicin
GCF_000517505	NZ_AYFR01000063.1	1	327	519	1.6000000000000002e-130	0.99	193	AACe1	yes	no	no	yes	no	dibekacin, sisomicin, amikacin, netilmicin, isepamicin, kanamycin, tobramycin
GCF_000516055	NZ_AYFS01000051.1	2	54	233	2.2000000000000002e-125	1.0	180	AACj	no	no	no	no	no	tobramycin, sisomicin, neomycin, dibekacin, netilmicin
GCF_000516075	NZ_AYFT01000225.1	2	54	233	2.5000000000000004e-125	1.0	180	AACj	no	no	no	no	no	sisomicin, netilmicin, tobramycin, neomycin, dibekacin
GCF_000515855	NZ_AYFV01000047.1	3	341	517	1e-125	0.99	177	ANTd	yes	no	no	yes	no	kanamycin, gentamicin, dibekacin, sisomicin, tobramycin	gentamicin, kanamycin
GCF_000515855	NZ_AYFV01000092.1	2	475	760	8.4e-186	1.0	286	AACh	yes	no	no	no	no	netilmicin, tobramycin, dibekacin, gentamicin, sisomicin	gentamicin
GCF_000517485	NZ_AYFW01000041.1	1	56	235	1.5000000000000001e-123	1.0	180	AACj	no	no	no	no	no	dibekacin, netilmicin, neomycin, tobramycin, sisomicin
GCF_000515835	NZ_AYFX01000084.1	2	69	248	8.5e-124	1.0	180	AACj	no	no	no	no	no	tobramycin, neomycin, sisomicin, netilmicin, dibekacin
GCF_000515815	NZ_AYFY01000023.1	3	70	249	2.9e-123	1.0	180	AACj	no	no	no	no	no	tobramycin, neomycin, netilmicin, dibekacin, sisomicin
GCF_000515795	NZ_AYFZ01000021.1	1	58	237	1.6e-124	1.0	180	AACj	no	no	no	no	no	tobramycin, netilmicin, neomycin, sisomicin, dibekacin
GCF_000515795	NZ_AYFZ01000208.1	3	476	761	1.5e-185	1.0	286	AACh	yes	no	no	no	no	tobramycin, sisomicin, dibekacin, gentamicin, netilmicin
GCF_000515755	NZ_AYGB01000103.1	3	476	761	1.5e-185	1.0	286	AACh	yes	no	no	no	no	gentamicin, tobramycin, dibekacin, sisomicin, netilmicin
GCF_000515755	NZ_AYGB01000127.1	1	343	519	1.8e-125	0.99	177	ANTd	yes	no	no	yes	no	gentamicin, kanamycin, sisomicin, dibekacin, tobramycin
GCF_000515755	NZ_AYGB01000152.1	1	58	237	1.6e-124	1.0	180	AACj	no	no	no	no	no	netilmicin, dibekacin, sisomicin, neomycin, tobramycin
GCF_000515735	NZ_AYGC01000060.1	2	71	250	8.5e-124	1.0	180	AACj	no	no	no	no	no	neomycin, tobramycin, sisomicin, dibekacin, netilmicin
GCF_000515715	NZ_AYGD01000041.1	2	344	536	2.6e-130	0.99	193	AACe1	yes	no	no	yes	no	isepamicin, kanamycin, tobramycin, dibekacin, sisomicin, netilmicin, amikacin
GCF_000515715	NZ_AYGD01000076.1	2	71	250	1.4000000000000001e-123	1.0	180	AACj	no	no	no	no	no	sisomicin, netilmicin, tobramycin, neomycin, dibekacin
GCF_000515695	NZ_AYGE01000022.1	1	70	249	1.3000000000000001e-123	1.0	180	AACj	no	no	no	no	no	tobramycin, dibekacin, sisomicin, neomycin, netilmicin
GCF_000515695	NZ_AYGE01000131.1	1	343	535	2.7000000000000003e-130	0.99	193	AACe1	yes	no	no	yes	no	netilmicin, tobramycin, kanamycin, dibekacin, amikacin, sisomicin, isepamicin
GCF_000515675	NZ_AYGF01000045.1	1	68	247	4.7e-123	1.0	180	AACj	no	no	no	no	no	dibekacin, netilmicin, sisomicin, tobramycin, neomycin
GCF_000515655	NZ_AYGG01000022.1	3	70	249	5.700000000000001e-124	1.0	180	AACj	no	no	no	no	no	sisomicin, neomycin, netilmicin, tobramycin, dibekacin
GCF_000515635	NZ_AYGH01000042.1	3	70	249	8.6e-124	1.0	180	AACj	no	no	no	no	no	neomycin, sisomicin, netilmicin, tobramycin, dibekacin
GCF_000515615	NZ_AYGI01000032.1	1	70	249	8.700000000000001e-124	1.0	180	AACj	no	no	no	no	no	tobramycin, dibekacin, sisomicin, netilmicin, neomycin
GCF_000515575	NZ_AYGK01000007.1	1	343	519	1.7000000000000001e-125	0.99	177	ANTd	yes	no	no	yes	no	gentamicin, sisomicin, dibekacin, kanamycin, tobramycin
GCF_000515575	NZ_AYGK01000059.1	1	58	237	1.5000000000000002e-124	1.0	180	AACj	no	no	no	no	no	dibekacin, tobramycin, neomycin, sisomicin, netilmicin
GCF_000515555	NZ_AYGL01000053.1	3	339	531	1.2000000000000002e-130	0.99	193	AACe1	yes	no	no	yes	no	amikacin, isepamicin, kanamycin, sisomicin, netilmicin, dibekacin, tobramycin
GCF_000515555	NZ_AYGL01000064.1	3	66	245	7.400000000000001e-124	1.0	180	AACj	no	no	no	no	no	sisomicin, neomycin, tobramycin, netilmicin, dibekacin
GCF_000515535	NZ_AYGM01000057.1	3	104	389	1.9e-185	1.0	286	AACh	yes	no	no	no	no	dibekacin, netilmicin, gentamicin, sisomicin, tobramycin	gentamicin
GCF_000515475	NZ_AYGO01000139.1	2	71	250	2.2e-123	1.0	180	AACj	no	no	no	no	no	dibekacin, netilmicin, tobramycin, neomycin, sisomicin
GCF_000515455	NZ_AYGP01000021.1	3	68	247	1.1e-123	1.0	180	AACj	no	no	no	no	no	netilmicin, dibekacin, tobramycin, neomycin, sisomicin
GCF_000515455	NZ_AYGP01000058.1	3	1138	1313	1.6e-101	0.99	176	AACa	yes	no	no	yes	no	gentamicin, fortimicin, sisomicin
GCF_000515495	NZ_AYGR01000141.1	1	92	377	2.4e-185	1.0	286	AACh	yes	no	no	no	no	tobramycin, gentamicin, dibekacin, sisomicin, netilmicin
GCF_000515495	NZ_AYGR01000162.1	2	54	233	2.4e-125	1.0	180	AACj	no	no	no	no	no	sisomicin, netilmicin, tobramycin, neomycin, dibekacin
GCF_000513795	NZ_AYGS01000022.1	2	55	234	7.900000000000001e-124	1.0	180	AACj	no	no	no	no	no	sisomicin, dibekacin, neomycin, tobramycin, netilmicin
GCF_000498795	NZ_AYLY01000073.1	1	102	297	1.2999999999999999e-129	0.99	196	AACe1	yes	no	no	yes	yes	isepamicin, dibekacin, netilmicin, kanamycin, amikacin, sisomicin, tobramycin	amikacin
GCF_000633475	NZ_AYMH01000067.1	2	6337	6509	1.8e-49	0.97	173	AACg	no	no	no	no	no	kanamycin, sisomicin, isepamicin, amikacin, tobramycin, netilmicin, dibekacin
GCF_000633335	NZ_AYMO01000011.1	2	29596	29739	6.9e-60	0.98	144	AACf1	no	no	no	no	no
GCF_000633555	NZ_AYMT01000011.1	1	29676	29819	6.5e-60	0.98	144	AACf1	no	no	no	no	no
GCF_000633395	NZ_AYMU01000020.1	-1	47499	47643	4.4e-56	0.96	145	AACf1	no	no	no	no	no
GCF_000648075	NZ_AYND01000003.1	3	617	894	2.2e-80	0.98	278	ANTa	no	no	no	no	no	streptomycin	streptomycin
GCF_000506465	NZ_AYNG01000049.1	1	99	384	6e-186	1.0	286	AACh	yes	no	no	no	yes	dibekacin, netilmicin, gentamicin, tobramycin, sisomicin	gentamicin
GCF_000506465	NZ_AYNG01000051.1	-3	100	295	8.5e-130	0.99	196	AACe1	yes	no	no	yes	yes	netilmicin, sisomicin, dibekacin, amikacin, tobramycin, kanamycin, isepamicin	amikacin
GCF_000498875	NZ_AYOG01000094.1	1	102	297	1.5e-129	0.99	196	AACe1	yes	no	no	yes	yes	sisomicin, netilmicin, isepamicin, amikacin, dibekacin, kanamycin, tobramycin	amikacin
GCF_000516115	NZ_AYOI01000007.1	2	50953	51238	1e-183	1.0	286	AACh	no	no	no	no	yes	sisomicin, netilmicin, tobramycin, dibekacin, gentamicin	gentamicin
GCF_000648175	NZ_AYOK01000011.1	2	5878	6155	7.300000000000001e-80	0.98	278	ANTa	no	no	no	no	no	streptomycin	streptomycin
GCF_000503175	NZ_AYON01000248.1	-3	23	199	1.2000000000000002e-124	0.99	177	ANTd	yes	no	no	no	no	sisomicin, gentamicin, dibekacin, kanamycin, tobramycin	kanamycin, gentamicin
GCF_000498815	NZ_AYOO01000047.1	1	99	384	8.900000000000001e-186	1.0	286	AACh	yes	no	no	no	yes	dibekacin, tobramycin, netilmicin, gentamicin, sisomicin	gentamicin
GCF_000498815	NZ_AYOO01000050.1	1	102	297	1.2999999999999999e-129	0.99	196	AACe1	yes	no	no	yes	yes	kanamycin, netilmicin, amikacin, sisomicin, tobramycin, isepamicin, dibekacin	amikacin
GCF_000498835	NZ_AYOP01000098.1	-1	102	297	1.6999999999999997e-129	0.99	196	AACe1	yes	no	no	yes	yes	netilmicin, isepamicin, amikacin, sisomicin, kanamycin, tobramycin, dibekacin	amikacin
GCF_000695285	NZ_AYOV01000068.1	1	4219	4411	4.1000000000000006e-130	0.99	193	AACe1	yes	no	no	no	yes	sisomicin, netilmicin, kanamycin, dibekacin, isepamicin, amikacin, tobramycin	amikacin
GCF_000498775	NZ_AYQE01000032.1	2	103	296	2.3e-128	0.99	194	AACe1	yes	no	no	yes	yes	sisomicin, amikacin, netilmicin, kanamycin, dibekacin, tobramycin, isepamicin	amikacin
GCF_000503515	NZ_AYQW01000130.1	-2	33	318	1.8e-185	1.0	286	AACh	yes	no	no	no	no	netilmicin, tobramycin, gentamicin, dibekacin, sisomicin	gentamicin
GCF_000503515	NZ_AYQW01000136.1	-3	36	231	2.4999999999999998e-129	0.99	196	AACe1	yes	no	no	yes	no	kanamycin, sisomicin, amikacin, dibekacin, netilmicin, isepamicin, tobramycin	amikacin
GCF_000567865	NZ_AYSK01000176.1	-2	770	1035	6.399999999999999e-109	0.97	266	AACb	no	no	no	no	yes
GCF_000567865	NZ_AYSK01000201.1	3	77	268	6.6e-131	0.99	192	AACe1	no	no	no	yes	no
GCF_000567865	NZ_AYSK01000220.1	3	18440	18688	1.2e-158	1.0	249	ANTc	no	no	no	no	no
GCF_000567865	NZ_AYSK01000243.1	-1	2069	2260	1.7000000000000001e-128	0.99	192	AACe1	no	no	yes	yes	no
GCF_000508125	NZ_AYTJ01000027.1	3	33614	33889	7.900000000000001e-133	0.99	276	ANTa	no	no	no	no	no	streptomycin	streptomycin
GCF_000507145	NZ_AYTO01000034.1	3	67386	67663	1.9e-148	0.99	278	ANTa	no	no	no	no	no	streptomycin
GCF_000506385	NZ_AYUD01000018.1	3	52223	52366	8.5e-55	0.98	144	AACf1	no	no	no	no	no	netilmicin, kanamycin, amikacin, sisomicin, dibekacin, isepamicin, tobramycin
GCF_000505845	NZ_AYUE01000055.1	-1	5481	5624	2.6000000000000002e-67	0.99	144	AACf1	no	no	no	no	no
GCF_000505525	NZ_AYUN01000065.1	1	18812	18955	8e-67	0.99	144	AACf1	no	no	no	no	no
GCF_000505505	NZ_AYUO01000085.1	1	13381	13524	1.7999999999999998e-68	0.99	144	AACf1	no	no	no	no	no
GCF_000505465	NZ_AYUQ01000061.1	2	60260	60403	3.7e-67	0.99	144	AACf1	no	no	no	no	no
GCF_000505345	NZ_AYUR01000019.1	-1	25923	26066	2.0000000000000002e-66	0.99	144	AACf1	no	no	no	no	no
GCF_000505325	NZ_AYUS01000019.1	1	25923	26066	1.9000000000000001e-66	0.99	144	AACf1	no	no	no	no	no
GCF_000505445	NZ_AYUT01000016.1	-1	25923	26066	1.7e-66	0.99	144	AACf1	no	no	no	no	no
GCF_000505305	NZ_AYUU01000019.1	1	25918	26061	1.6e-66	0.99	144	AACf1	no	no	no	no	no
GCF_000505285	NZ_AYUV01000006.1	2	67402	67545	4.9e-66	0.99	144	AACf1	no	no	no	no	no
GCF_000505265	NZ_AYUW01000006.1	-2	67402	67545	5.1e-66	0.99	144	AACf1	no	no	no	no	no
GCF_000505245	NZ_AYUX01000039.1	-3	3214	3357	6.5e-67	0.99	144	AACf1	no	no	no	no	no
GCF_000505425	NZ_AYUY01000008.1	2	57658	57801	4.6e-66	0.99	144	AACf1	no	no	no	no	no
GCF_000505205	NZ_AYVA01000007.1	1	67514	67657	4.5000000000000003e-66	0.99	144	AACf1	no	no	no	no	no
GCF_000505405	NZ_AYVB01000009.1	-2	67452	67595	4.5000000000000003e-66	0.99	144	AACf1	no	no	no	no	no
GCF_000505165	NZ_AYVD01000007.1	-2	67545	67688	4.4e-66	0.99	144	AACf1	no	no	no	no	no
GCF_000505145	NZ_AYVG01000016.1	-1	25918	26061	1.8e-66	0.99	144	AACf1	no	no	no	no	no
GCF_000505125	NZ_AYVH01000224.1	1	1433	1576	1.4e-66	0.99	144	AACf1	no	no	no	no	no
GCF_000505105	NZ_AYVI01000139.1	3	6880	7023	5.2e-68	0.99	144	AACf1	no	no	no	no	no
GCF_000505085	NZ_AYVJ01000081.1	-1	2687	2830	4.199999999999999e-68	0.99	144	AACf1	no	no	no	no	no
GCF_000564855	NZ_AYXG01000139.1	2	31085	31388	7.1e-136	0.99	304	APHb	no	no	no	no	no
GCF_000571955	NZ_AYXQ01000012.1	3	24223	24395	1.4999999999999998e-49	0.97	173	AACg	no	no	no	no	no	sisomicin, amikacin, tobramycin, isepamicin, dibekacin, netilmicin, kanamycin
GCF_001436225	NZ_AYYO01000016.1	3	2037	2309	5.6e-57	0.95	273	ANTa	no	no	no	no	no	streptomycin	streptomycin
GCF_000506805	NZ_AZBO01000106.1	-3	7115	7371	2.6e-80	0.95	257	APHf	no	no	no	no	no	streptomycin
GCF_000516935	NZ_AZBT01000068.1	1	128	305	7.4e-111	0.99	178	AACg	yes	no	no	no	no	kanamycin, tobramycin, amikacin, sisomicin, dibekacin, isepamicin, netilmicin	amikacin
GCF_001435585	NZ_AZEC01000007.1	2	33688	33830	3.5e-35	0.96	143	AACf1	no	no	no	no	no
GCF_000506885	NZ_AZHU01000083.1	1	383	543	9.599999999999999e-83	0.98	161	AACa	no	no	no	yes	yes
GCF_000506885	NZ_AZHU01000099.1	-3	803	947	9.7e-53	0.97	145	AACf1	no	no	no	yes	yes
GCF_000506885	NZ_AZHU01000112.1	-3	2609	2874	3.7e-108	0.97	266	AACb	no	no	no	no	yes
GCF_000506885	NZ_AZHU01000189.1	2	17457	17713	2.2e-80	0.95	257	APHf	no	no	no	no	no
GCF_000524415	NZ_AZKO02000048.1	1	18384	18527	2e-68	0.99	144	AACf1	no	no	no	no	no
GCF_000524725	NZ_AZKP01000034.1	3	2692	2835	1.3000000000000001e-67	0.99	144	AACf1	no	no	no	no	no
GCF_000524965	NZ_AZKQ02000002.1	1	14156	14299	2.6999999999999997e-68	0.99	144	AACf1	no	no	no	no	no
GCF_000524745	NZ_AZKR01000025.1	-2	54888	55031	3.6e-67	0.99	144	AACf1	no	no	no	no	no
GCF_000524785	NZ_AZKT01000001.1	-2	44213	44356	3.5e-67	0.99	144	AACf1	no	no	no	no	no
GCF_000524825	NZ_AZKU01000005.1	-1	44213	44356	3e-67	0.99	144	AACf1	no	no	no	no	no
GCF_000524845	NZ_AZKX01000017.1	-1	39913	40056	4.8e-68	0.99	144	AACf1	no	no	no	no	no
GCF_000524865	NZ_AZKY01000055.1	-2	6091	6234	1.3999999999999998e-68	0.99	144	AACf1	no	no	no	no	no
GCF_000524905	NZ_AZKZ01000001.1	-2	74713	74856	1e-67	0.99	144	AACf1	no	no	no	no	no
GCF_000524925	NZ_AZLA01000009.1	-1	41777	41920	5.2e-68	0.99	144	AACf1	no	no	no	no	no
GCF_000524945	NZ_AZLB01000017.1	3	6527	6670	1e-67	0.99	144	AACf1	no	no	no	no	no
GCF_000524705	NZ_AZLC01000005.1	1	2673	2816	5.699999999999999e-68	0.99	144	AACf1	no	no	no	no	no
GCF_000732835	NZ_AZMZ01000054.1	2	158	335	7.8e-111	0.99	178	AACg	yes	no	no	no	no	dibekacin, isepamicin, netilmicin, sisomicin, tobramycin, kanamycin, amikacin	amikacin
GCF_001951785	NZ_AZNJ01000060.1	-2	44982	45125	1.6e-67	0.99	144	AACf1	no	no	no	no	no
GCF_001951835	NZ_AZNK01000044.1	-2	174424	174567	3.3e-67	0.99	144	AACf1	no	no	no	no	no
GCF_000510665	NZ_AZNW01000058.1	2	11320	11398	9.599999999999999e-39	0.98	79	AACi	no	no	no	no	no	netilmicin, amikacin, dibekacin, tobramycin, sisomicin	gentamicin
GCF_000565725	NZ_AZOR01000238.1	3	32	225	1.8e-131	0.99	194	AACe1	yes	no	no	yes	no	isepamicin, kanamycin, dibekacin, netilmicin, tobramycin, sisomicin, amikacin	amikacin
GCF_000521345	NZ_AZQO01000021.1	3	11014	11290	1.9999999999999998e-84	0.97	277	ANTa	no	no	no	no	no	streptomycin	streptomycin
GCF_000582885	NZ_AZQS01000002.1	2	145756	146034	8.3e-156	0.99	279	ANTa	no	no	no	no	no	streptomycin
GCF_000585435	NZ_AZQY01000015.1	3	1844	1982	3.1e-45	0.96	139	AACf1	no	no	no	no	no
GCF_000521885	NZ_AZRG01000013.1	2	13292	13435	8.900000000000001e-67	0.99	144	AACf1	no	no	no	no	no
GCF_003073355	NZ_AZSP01000002.1	3	14269	14562	6.4e-98	0.96	294	APHb	no	no	no	no	no
GCF_000518045	NZ_AZSS01000320.1	1	3177	3468	1.4000000000000001e-98	0.97	292	APHb	no	no	no	no	no
GCF_001507775	NZ_AZSY01000009.1	3	5803	6066	6.100000000000001e-101	0.97	264	ANTa	no	no	no	no	no	streptomycin	streptomycin
GCF_000564935	NZ_AZTG01000016.1	2	746	1022	1e-177	1.0	277	ANTa	no	no	no	no	yes	streptomycin	streptomycin
GCF_000564915	NZ_AZTI01000020.1	2	728	1004	1.2999999999999998e-177	1.0	277	ANTa	no	no	no	no	yes	streptomycin	streptomycin
GCF_000526975	NZ_AZUH01000013.1	3	11554	11726	9.9e-80	0.99	173	ANTd	no	no	no	no	no	sisomicin, gentamicin, kanamycin, dibekacin, tobramycin	gentamicin, kanamycin
GCF_000526995	NZ_AZUI01000001.1	3	281314	281592	7e-70	0.95	279	ANTa	no	no	no	no	no	streptomycin	streptomycin
GCF_000527075	NZ_AZUM01000005.1	2	47188	47467	8.5e-118	0.99	280	AACb	no	no	no	no	no
GCF_000513975	NZ_AZVA01000040.1	3	2126	2395	4.4e-151	0.99	270	AACh	no	no	no	no	no	tobramycin, gentamicin, netilmicin, sisomicin, dibekacin	gentamicin
GCF_000514195	NZ_AZVL01000004.1	2	2075	2333	1.4e-73	0.95	259	APHf	no	no	no	no	no	streptomycin
GCF_001970895	NZ_AZYS01000009.1	-1	6534	6677	1.2e-67	0.99	144	AACf1	no	no	no	no	no
GCF_001970965	NZ_AZYT01000002.1	-2	66316	66459	1.9e-67	0.99	144	AACf1	no	no	no	no	no
GCF_000241305	NZ_BAEH01000009.1	2	14867	15037	7.3e-57	0.98	171	AACc	no	no	no	no	no	neomycin, sisomicin, dibekacin, netilmicin, tobramycin
GCF_000248075	NZ_BAFB01000065.1	2	39612	39787	2.8e-54	0.96	176	AACc	no	no	no	no	no	neomycin, sisomicin, dibekacin, tobramycin, netilmicin
GCF_000248055	NZ_BAFC01000058.1	3	1311	1484	7.4999999999999995e-56	0.96	174	AACc	no	no	no	no	no	sisomicin, netilmicin, neomycin, tobramycin, dibekacin
GCF_000308915	NZ_BAFI01000024.1	1	276	453	1.7e-109	0.99	178	AACg	yes	no	no	no	yes	sisomicin, netilmicin, isepamicin, amikacin, kanamycin, tobramycin, dibekacin
GCF_000308915	NZ_BAFI01000029.1	-3	47	299	5.8e-184	1.0	253	ANTb	yes	no	no	no	no	isepamicin, tobramycin, kanamycin, dibekacin, neomycin, amikacin
GCF_000296695	NZ_BAFK01000008.1	3	10649	10798	5.6e-67	0.97	150	AACa	no	no	no	no	no	fortimicin, gentamicin, sisomicin	gentamicin
GCF_000308815	NZ_BAFX01000032.1	3	8905	9049	1.0999999999999999e-47	0.99	145	AACf1	no	no	no	no	no
GCF_000508965	NZ_BAHV02000008.1	3	48742	49006	4.5e-64	0.96	265	ANTa	no	no	no	no	no	streptomycin	streptomycin
GCF_000471805	NZ_BAHY01000018.1	3	11684	11825	2.2e-45	0.97	142	AACf1	no	no	no	no	no	sisomicin, netilmicin, kanamycin, dibekacin, amikacin, tobramycin, isepamicin
GCF_000471825	NZ_BAHZ01000015.1	1	9930	10194	4.0000000000000004e-72	0.97	265	ANTa	no	no	no	no	no
GCF_000471825	NZ_BAHZ01000055.1	2	11797	11946	3.1e-50	0.96	150	AACd	no	no	no	no	no
GCF_000471825	NZ_BAHZ01000111.1	1	2021	2294	7.6e-128	0.99	274	ANTa	no	no	no	no	no
GCF_000471825	NZ_BAHZ01000192.1	3	3762	4019	1.4e-58	0.95	258	ANTa	no	no	no	no	no
GCF_000509065	NZ_BAID02000300.1	2	589	862	7.6e-144	1.0	274	ANTa	no	no	no	no	no	streptomycin	streptomycin
GCF_000509065	NZ_BAID02000314.1	-2	134	311	4.4000000000000005e-110	0.99	178	AACg	yes	no	no	no	no	tobramycin, netilmicin, amikacin, dibekacin, sisomicin, isepamicin, kanamycin	amikacin
GCF_000471745	NZ_BAIG01000076.1	3	3454	3727	6.800000000000001e-128	0.99	274	ANTa	no	no	no	no	no	streptomycin	streptomycin
GCF_000509145	NZ_BAIJ02000006.1	-3	918	1191	2.9999999999999998e-142	1.0	274	ANTa	no	no	yes	no	no	streptomycin
GCF_000509145	NZ_BAIJ02000073.1	1	43	224	3.2e-34	0.95	182	AACg	no	no	no	no	no	tobramycin, dibekacin, kanamycin, isepamicin, amikacin, sisomicin, netilmicin
GCF_000509145	NZ_BAIJ02000132.1	1	6752	7014	6.799999999999999e-69	0.96	263	ANTa	no	no	no	no	no	streptomycin
GCF_000509185	NZ_BAIL02000027.1	3	7201	7474	1.0999999999999999e-127	0.99	274	ANTa	no	no	no	no	no	streptomycin	streptomycin
GCF_000509185	NZ_BAIL02000029.1	-2	3705	3973	1.1999999999999999e-61	0.96	269	ANTa	no	no	no	no	no	streptomycin	streptomycin
GCF_000509185	NZ_BAIL02000053.1	2	11710	11974	2.7e-72	0.97	265	ANTa	no	no	no	no	no	streptomycin	streptomycin
GCF_000315235	NZ_BALG01000022.1	1	73	342	2e-106	0.98	270	ANTa	no	no	no	no	no	streptomycin	streptomycin
GCF_000747645	NZ_BALZ01000092.1	1	1513	1791	1.1e-155	0.99	279	ANTa	no	no	no	no	yes	streptomycin
GCF_000964445	NZ_BANG01000025.1	1	4210	4454	4.1e-70	0.95	245	APHf	no	no	no	no	no	streptomycin
GCF_000333035	NZ_BANU01000006.1	3	43650	43833	1.4e-51	0.96	184	AACc	no	no	no	no	no	sisomicin, netilmicin, neomycin, tobramycin, dibekacin
GCF_000367365	NZ_BARF01000042.1	1	16164	16341	2.2e-50	0.96	178	AACc	no	no	no	no	no	sisomicin, neomycin, netilmicin, tobramycin, dibekacin
GCF_000376565	NZ_BARG01000029.1	3	11290	11466	3.2e-50	0.97	177	AACc	no	no	no	no	no	dibekacin, neomycin, tobramycin, sisomicin, netilmicin
GCF_000509285	NZ_BARZ01000047.1	2	6433	6613	1.8e-103	0.99	181	AACc	no	no	no	no	no	dibekacin, tobramycin, neomycin, netilmicin, sisomicin
GCF_000509305	NZ_BASA01000056.1	3	217	409	2.9e-131	0.99	193	AACe1	yes	no	no	yes	no	netilmicin, kanamycin, tobramycin, isepamicin, sisomicin, amikacin, dibekacin	amikacin
GCF_000509325	NZ_BASB01000022.1	3	60020	60212	1.6999999999999997e-129	0.99	193	AACe1	no	no	no	yes	no	dibekacin, netilmicin, isepamicin, amikacin, sisomicin, kanamycin, tobramycin	amikacin
GCF_000509345	NZ_BASC01000036.1	2	417	609	2.9e-131	0.99	193	AACe1	yes	no	no	no	no	sisomicin, dibekacin, isepamicin, tobramycin, amikacin, kanamycin, netilmicin	amikacin
GCF_000509345	NZ_BASC01000062.1	1	1387	1562	1.9e-101	0.99	176	AACa	no	no	no	yes	no	sisomicin, gentamicin, fortimicin	gentamicin
GCF_000474255	NZ_BATO01000084.1	-1	5503	5759	4.8e-72	0.96	257	APHf	no	no	no	no	no	streptomycin
GCF_000474195	NZ_BATY01000094.1	2	686	953	3.2000000000000003e-71	0.95	268	ANTa	no	no	no	no	no	streptomycin	streptomycin
GCF_000485815	NZ_BAUB01000002.1	1	73032	73188	8.2e-74	0.98	157	AACa	no	no	no	no	no	sisomicin, fortimicin, gentamicin	gentamicin
GCF_000513155	NZ_BAUY01000003.1	3	7905	8077	7.4e-47	0.97	173	AACg	no	no	no	no	no	kanamycin, sisomicin, dibekacin, amikacin, tobramycin, isepamicin, netilmicin
GCF_000576305	NZ_BAVZ01000001.1	1	204104	204277	8.4e-49	0.96	174	AACg	no	no	no	no	no	amikacin, kanamycin, dibekacin, isepamicin, sisomicin, tobramycin, netilmicin
GCF_000576325	NZ_BAWA01000002.1	1	61719	61998	9.2e-67	0.95	280	ANTa	no	no	no	no	no	streptomycin	streptomycin
GCF_000576345	NZ_BAWB01000068.1	2	2024	2303	6.1e-68	0.95	280	ANTa	no	no	no	no	no	streptomycin	streptomycin
GCF_000583715	NZ_BAWD02000034.1	1	7421	7564	1.2999999999999999e-46	0.98	144	AACf1	no	no	no	no	no
GCF_000586495	NZ_BAWL01000049.1	2	1514	1787	3.3e-96	0.98	274	ANTa	no	no	no	no	no	streptomycin	streptomycin
GCF_000696225	NZ_BAWN01000081.1	2	57	218	3.1e-81	0.99	162	AACd	no	no	no	yes	no	kanamycin, tobramycin, dibekacin, sisomicin, netilmicin, isepamicin, amikacin
GCF_000648295	NZ_BAWP01000048.1	3	2531	2798	5.5e-72	0.96	268	ANTa	no	no	no	no	yes	streptomycin	streptomycin
GCF_000698105	NZ_BAWZ01000011.1	3	18257	18488	8.6e-29	0.95	232	ANTb	no	no	no	no	no	dibekacin, amikacin, neomycin, tobramycin, isepamicin, kanamycin
GCF_000698105	NZ_BAWZ01000022.1	3	15631	15891	8.7e-88	0.96	261	ANTa	no	no	no	no	no	streptomycin
GCF_000698145	NZ_BAXB01000001.1	3	23534	23795	9e-88	0.96	262	ANTa	no	no	no	no	no	streptomycin
GCF_000698145	NZ_BAXB01000015.1	2	14231	14462	5.500000000000001e-28	0.95	232	ANTb	no	no	no	no	no	kanamycin, tobramycin, neomycin, dibekacin, amikacin, isepamicin
GCF_001310595	NZ_BAXP01000002.1	2	70669	70948	1.2e-66	0.95	280	ANTa	no	no	no	no	no	streptomycin	streptomycin
GCF_000698205	NZ_BAXY01000008.1	2	68147	68289	2.4e-58	0.98	143	AACf1	no	no	no	no	no	kanamycin, isepamicin, dibekacin, netilmicin, amikacin, sisomicin, tobramycin
GCF_000694995	NZ_BAYP01000020.1	3	16825	17100	4.9e-69	0.95	276	ANTa	no	no	no	no	no	streptomycin
GCF_000694995	NZ_BAYP01000031.1	2	42320	42648	1.3000000000000001e-201	1.0	329	APHd1	no	no	no	no	no	spectinomycin
GCF_000695015	NZ_BAYQ01000003.1	2	39341	39669	3.7e-202	1.0	329	APHd1	no	no	no	no	no	spectinomycin
GCF_000711175	NZ_BAYU01000009.1	2	7751	7893	1.8000000000000001e-22	0.95	143	AACf1	no	no	no	no	no	amikacin, tobramycin, dibekacin, kanamycin, isepamicin, netilmicin, sisomicin
GCF_000699225	NZ_BAZA01000120.1	1	3471	3801	4.5e-203	0.99	331	APHd1	no	no	no	no	no	spectinomycin
GCF_000710955	NZ_BAZE01000019.1	2	5844	6148	7.600000000000001e-164	0.99	305	APHb	no	no	no	no	no
GCF_001315125	NZ_BAZT01000001.1	1	204104	204277	8.4e-49	0.96	174	AACg	no	no	no	no	no	netilmicin, sisomicin, amikacin, kanamycin, dibekacin, isepamicin, tobramycin
GCF_001311055	NZ_BBAC01000015.1	1	2019	2291	6.3e-57	0.95	273	ANTa	no	no	no	no	no	streptomycin	streptomycin
GCF_000739915	NZ_BBJT01000015.1	2	26170	26447	7.3e-143	0.99	278	ANTa	no	no	no	no	no	streptomycin
GCF_000974385	NZ_BBKC01000074.1	-2	48	300	1.2e-183	1.0	253	ANTb	yes	no	no	no	yes	tobramycin, neomycin, kanamycin, isepamicin, dibekacin, amikacin
GCF_000974385	NZ_BBKC01000087.1	-2	135	312	1.8e-110	0.99	178	AACg	yes	no	no	no	no	amikacin, netilmicin, dibekacin, sisomicin, tobramycin, isepamicin, kanamycin
GCF_000759735	NZ_BBMV01000012.1	2	59008	59254	3.3000000000000003e-81	0.95	247	APHf	no	no	no	no	no	streptomycin
GCF_000760415	NZ_BBNG01000017.1	1	39	218	7.6e-124	1.0	180	AACj	no	no	no	no	no	dibekacin, neomycin, sisomicin, netilmicin, tobramycin
GCF_000760475	NZ_BBNJ01000014.1	2	30	209	6.1e-121	1.0	180	AACj	no	no	no	no	no	sisomicin, netilmicin, tobramycin, dibekacin, neomycin
GCF_000760475	NZ_BBNJ01000034.1	2	1750	1913	6.8e-114	0.99	164	ANTd	no	no	no	no	no	sisomicin, tobramycin, gentamicin, dibekacin, kanamycin
GCF_000829715	NZ_BBNO01000008.1	3	192075	192251	6.900000000000001e-59	0.97	177	AACc	no	no	no	no	no	netilmicin, dibekacin, tobramycin, neomycin, sisomicin
GCF_001652895	NZ_BBON01000086.1	1	15657	15960	2.3e-165	0.99	304	APHb	no	no	no	no	no
GCF_001652895	NZ_BBON01000134.1	1	13835	13897	4.1e-45	0.99	63	APHe	no	no	no	no	no
GCF_000775895	NZ_BBOO01000014.1	2	67	246	1e-101	1.0	180	AACj	no	no	no	no	no	sisomicin, netilmicin, dibekacin, neomycin, tobramycin
GCF_000775855	NZ_BBOQ01000015.1	2	30	209	6.5e-121	1.0	180	AACj	no	no	no	no	no	netilmicin, sisomicin, dibekacin, neomycin, tobramycin
GCF_000775855	NZ_BBOQ01000039.1	3	911	1087	3.3e-123	0.99	177	ANTd	yes	no	no	yes	no	dibekacin, sisomicin, kanamycin, tobramycin, gentamicin
GCF_000775835	NZ_BBOR01000026.1	2	36	215	5.8e-121	1.0	180	AACj	no	no	no	no	no	tobramycin, sisomicin, dibekacin, netilmicin, neomycin
GCF_000775815	NZ_BBOS01000134.1	2	236	427	2.7000000000000003e-130	0.99	192	AACe1	no	no	no	yes	no	tobramycin, netilmicin, kanamycin, isepamicin, dibekacin, sisomicin, amikacin	amikacin
GCF_000775815	NZ_BBOS01000138.1	3	2	178	1.8e-126	0.99	177	ANTd	yes	no	no	no	no	gentamicin, kanamycin, tobramycin, dibekacin, sisomicin	gentamicin, kanamycin
GCF_001553435	NZ_BBOU01000050.1	3	28858	29102	1.7e-119	0.99	245	APHg	no	no	no	no	no
GCF_001553435	NZ_BBOU01000080.1	1	1885	1947	2.3e-45	0.99	63	APHe	no	no	no	no	no
GCF_001553455	NZ_BBOX01000009.1	3	25138	25382	7.0000000000000006e-118	0.99	245	APHg	no	no	no	no	no
GCF_001553455	NZ_BBOX01000282.1	1	11461	11764	2.9e-165	0.99	304	APHb	no	no	no	no	no
GCF_001553475	NZ_BBOY01000265.1	2	4339	4401	2.6e-45	0.99	63	APHe	no	no	no	no	yes
GCF_000787795	NZ_BBPN01000045.1	3	2848	3022	1.3e-52	0.96	175	AACc	no	no	no	no	no	netilmicin, dibekacin, tobramycin, neomycin, sisomicin
GCF_000787855	NZ_BBPQ01000005.1	3	11050	11224	4.2e-53	0.96	175	AACc	no	no	no	no	no	tobramycin, dibekacin, neomycin, sisomicin, netilmicin
GCF_000829755	NZ_BBPT01000013.1	3	470	798	1.8e-110	0.98	329	APHd1	no	no	no	no	no	spectinomycin
GCF_000813225	NZ_BBQB01000009.1	2	62723	62866	5.999999999999999e-54	0.98	144	AACf1	no	no	no	no	no	tobramycin, kanamycin, amikacin, isepamicin, sisomicin, netilmicin, dibekacin
GCF_000813365	NZ_BBQG01000033.1	1	26372	26653	6.9e-107	0.99	282	AACb	no	yes	no	no	no
GCF_000818215	NZ_BBQU01000019.1	1	33	212	4.3e-97	1.0	180	AACj	no	no	no	no	no	sisomicin, dibekacin, neomycin, netilmicin, tobramycin
GCF_001417695	NZ_BBRS01000032.1	3	15066	15356	1.2e-103	0.96	291	APHb	no	no	no	no	no
GCF_000830135	NZ_BBSE01000020.1	1	12198	12340	3.6999999999999996e-68	0.98	143	AACf1	no	no	no	no	no
GCF_001319805	NZ_BBSK01000120.1	-1	4122	4360	1.4e-64	0.95	239	APHf	no	no	no	no	no	streptomycin
GCF_000836075	NZ_BBSP01000031.1	1	1465	1641	2.9e-123	0.99	177	ANTd	yes	no	no	yes	no	tobramycin, sisomicin, kanamycin, dibekacin, gentamicin	kanamycin, gentamicin
GCF_000876055	NZ_BBTC01000018.1	1	39	218	7.900000000000001e-124	1.0	180	AACj	no	no	no	no	no	netilmicin, dibekacin, sisomicin, neomycin, tobramycin
GCF_000876095	NZ_BBTE01000015.1	1	36	215	6.2e-121	1.0	180	AACj	no	no	no	no	no	sisomicin, netilmicin, neomycin, dibekacin, tobramycin
GCF_000876095	NZ_BBTE01000035.1	2	279	455	3.2000000000000005e-123	0.99	177	ANTd	no	no	no	no	no	kanamycin, tobramycin, dibekacin, sisomicin, gentamicin
GCF_000876115	NZ_BBTF01000032.1	1	70	249	1.1999999999999999e-92	1.0	180	AACj	no	no	no	no	no	netilmicin, sisomicin, tobramycin, dibekacin, neomycin
GCF_000931715	NZ_BBTL01000003.1	3	37798	37941	1.2e-62	0.98	144	AACf1	no	no	no	no	no
GCF_000931775	NZ_BBTO01000012.1	3	35	214	8.4e-106	1.0	180	AACj	no	no	no	no	no	neomycin, sisomicin, dibekacin, tobramycin, netilmicin
GCF_000931895	NZ_BBTQ01000062.1	2	704	893	5.9e-111	0.99	190	AACe1	no	no	no	yes	yes
GCF_000934145	NZ_BBTT01000001.1	1	50	229	8.6e-84	1.0	180	AACj	no	yes	no	no	no	tobramycin, neomycin, sisomicin, dibekacin, netilmicin
GCF_000949755	NZ_BBTY01000050.1	3	721	910	3.9e-111	0.99	190	AACe1	no	no	no	yes	yes
GCF_000949775	NZ_BBTZ01000080.1	2	704	893	7.2e-111	0.99	190	AACe1	no	no	no	yes	yes
GCF_000949815	NZ_BBUB01000001.1	1	50	229	1e-83	1.0	180	AACj	no	yes	no	no	no	dibekacin, tobramycin, neomycin, netilmicin, sisomicin
GCF_000950675	NZ_BBUG01000034.1	2	12931	13206	7.599999999999999e-68	0.95	276	ANTa	no	no	no	no	no	streptomycin	streptomycin
GCF_000950695	NZ_BBUH01000034.1	2	12931	13206	8.199999999999999e-68	0.95	276	ANTa	no	no	no	no	no	streptomycin	streptomycin
GCF_000950745	NZ_BBUI01000027.1	1	1014	1289	1e-71	0.95	276	ANTa	no	no	no	no	no	streptomycin	streptomycin
GCF_000953915	NZ_BBUJ01000020.1	3	16825	17100	4.2999999999999995e-69	0.95	276	ANTa	no	no	no	no	no	streptomycin	streptomycin
GCF_000953935	NZ_BBUK01000072.1	3	4525	4800	7.199999999999999e-69	0.95	276	ANTa	no	no	no	no	yes	streptomycin	streptomycin
GCF_000974705	NZ_BBUN01000260.1	2	374	554	6.9e-89	0.99	181	AACc	no	no	no	no	no	netilmicin, tobramycin, sisomicin, neomycin, dibekacin
GCF_000953895	NZ_BBUQ01000006.1	3	306	489	2.6e-104	0.98	184	AACe1	no	no	no	yes	no	sisomicin, tobramycin, netilmicin, dibekacin, gentamicin, kanamycin	gentamicin
GCF_000953895	NZ_BBUQ01000130.1	2	30	223	5.1e-131	0.99	194	AACe1	yes	no	no	no	no	netilmicin, sisomicin, tobramycin, isepamicin, kanamycin, dibekacin, amikacin	amikacin
GCF_001592505	NZ_BBUS01000062.1	2	498	674	8e-121	0.99	177	ANTd	yes	no	no	yes	no	sisomicin, tobramycin, kanamycin, gentamicin, dibekacin	kanamycin, gentamicin
GCF_001592525	NZ_BBUT01000096.1	1	499	675	5.9e-121	0.99	177	ANTd	yes	no	no	yes	no	kanamycin, gentamicin, tobramycin, dibekacin, sisomicin	kanamycin, gentamicin
GCF_001590865	NZ_BBUY01000001.1	2	106066	106186	6.6e-64	1.0	121	AACm	no	no	no	no	no
GCF_001590865	NZ_BBUY01000013.1	1	17589	17763	5.1e-63	0.98	175	AACc	no	no	no	no	no
GCF_001192655	NZ_BBVC01000065.1	-2	2659	2990	1.8e-116	0.97	332	APHd1	no	no	no	no	no	spectinomycin
GCF_001485215	NZ_BBWW01000002.1	3	64398	64541	1.2999999999999998e-47	0.99	144	AACf1	no	no	no	no	no
GCF_001015005	NZ_BBWX01000037.1	3	1894	2170	5.5e-85	0.97	277	ANTa	no	no	no	no	yes	streptomycin	streptomycin
GCF_001192935	NZ_BBYQ01000004.1	2	36949	37092	4.6e-46	0.98	144	AACf1	no	no	no	no	no
GCF_001293595	NZ_BBZE01000009.1	1	66861	67032	6.5e-52	0.97	172	AACc	no	no	no	no	no	sisomicin, neomycin, dibekacin, netilmicin, tobramycin
GCF_001305055	NZ_BBZX01000003.1	1	78086	78350	8e-64	0.96	265	ANTa	no	no	no	no	no	streptomycin	streptomycin
GCF_001305075	NZ_BBZY01000003.1	-3	14259	14532	4.9999999999999995e-142	1.0	274	ANTa	no	no	no	no	no	streptomycin	streptomycin
GCF_001305115	NZ_BCAA01000008.1	2	19769	20042	1e-141	1.0	274	ANTa	no	no	yes	no	no	streptomycin	streptomycin
GCF_001570645	NZ_BCAN01000079.1	2	9818	10062	1.5e-119	0.99	245	APHg	no	no	no	no	no	spectinomycin
GCF_001753855	NZ_BCAQ01000168.1	3	6	188	1.2e-111	0.99	183	AACe1	no	no	no	yes	yes
GCF_001753855	NZ_BCAQ01000182.1	-2	591	774	1.1e-104	0.98	184	AACe1	no	no	no	yes	no
GCF_001753855	NZ_BCAQ01000201.1	3	33	194	1e-90	0.99	162	AACd	yes	no	no	no	no
GCF_001319995	NZ_BCAS01000206.1	-2	7	189	1.9e-111	0.98	183	AACe1	no	no	no	yes	yes
GCF_001320085	NZ_BCAU01000089.1	2	973	1216	5.9e-82	0.95	244	APHf	no	no	no	no	no	streptomycin
GCF_001320125	NZ_BCAV01000087.1	-3	776	937	1.4e-85	0.99	162	AACd	no	no	no	yes	yes	sisomicin, isepamicin, dibekacin, kanamycin, tobramycin, amikacin, netilmicin
GCF_001753895	NZ_BCAW01000218.1	-1	1	190	7.2e-130	1.0	190	AACe1	yes	no	no	no	no	dibekacin, kanamycin, amikacin, isepamicin, sisomicin, netilmicin, tobramycin	amikacin
GCF_001320165	NZ_BCAX01000074.1	1	4697	4858	3.1e-89	0.99	162	AACd	no	no	no	yes	no	sisomicin, dibekacin, netilmicin, isepamicin, tobramycin, kanamycin, amikacin
GCF_001320295	NZ_BCBB01000011.1	-1	1	190	4.4000000000000005e-130	1.0	190	AACe1	yes	no	no	no	no	kanamycin, tobramycin, amikacin, dibekacin, sisomicin, netilmicin, isepamicin
GCF_001320295	NZ_BCBB01000121.1	-2	323	484	8.7e-85	0.99	162	AACd	no	no	no	yes	no	dibekacin, isepamicin, netilmicin, amikacin, sisomicin, kanamycin, tobramycin
GCF_001753935	NZ_BCBC01000197.1	-1	237	428	6.000000000000001e-131	0.99	192	AACe1	no	no	no	no	no	sisomicin, netilmicin, isepamicin, dibekacin, tobramycin, amikacin, kanamycin	amikacin
GCF_001320345	NZ_BCBD01000273.1	1	543	732	6.5e-113	0.99	190	AACe1	no	no	no	yes	no
GCF_001320385	NZ_BCBE01000104.1	1	3859	4049	5e-111	0.99	191	AACe1	no	no	no	yes	yes
GCF_001320565	NZ_BCBI01000002.1	-3	44659	44897	4.7e-74	0.96	239	APHf	no	no	no	no	no	streptomycin
GCF_001320705	NZ_BCBL01000046.1	-2	19004	19147	1.6e-50	0.97	144	AACf1	no	no	no	no	no	sisomicin, amikacin, kanamycin, netilmicin, isepamicin, dibekacin, tobramycin
GCF_001320785	NZ_BCBN01000019.1	2	8387	8642	2.2e-76	0.95	256	APHf	no	no	no	no	no	streptomycin
GCF_001320835	NZ_BCBO01000052.1	-1	8409	8664	3.6999999999999997e-75	0.95	256	APHf	no	no	no	no	no	streptomycin
GCF_001320885	NZ_BCBQ01000002.1	-1	18615	18853	5.4e-74	0.96	239	APHf	no	no	no	no	no	streptomycin
GCF_001320925	NZ_BCBS01000274.1	-3	9	204	7.4e-132	0.99	196	AACe1	no	no	no	yes	no
GCF_001320925	NZ_BCBS01000290.1	3	300	490	2.7999999999999998e-112	0.98	191	AACe1	no	no	no	yes	no
GCF_001321005	NZ_BCBU01000102.1	-1	4697	4858	4.7e-89	0.99	162	AACd	no	no	no	yes	no	amikacin, netilmicin, dibekacin, isepamicin, sisomicin, kanamycin, tobramycin
GCF_001748105	NZ_BCLL01000019.1	1	67	319	6e-184	1.0	253	ANTb	yes	no	no	no	no	kanamycin, neomycin, tobramycin, isepamicin, amikacin, dibekacin
GCF_001748105	NZ_BCLL01000038.1	3	39	216	6e-111	0.99	178	AACg	yes	no	no	no	no	kanamycin, isepamicin, sisomicin, dibekacin, amikacin, tobramycin, netilmicin
GCF_001748125	NZ_BCLM01000022.1	3	65	317	5.6e-184	1.0	253	ANTb	yes	no	no	no	no	isepamicin, neomycin, dibekacin, kanamycin, tobramycin, amikacin
GCF_001748125	NZ_BCLM01000030.1	-1	153	330	7.8e-111	0.99	178	AACg	yes	no	no	no	no	netilmicin, isepamicin, tobramycin, dibekacin, amikacin, kanamycin, sisomicin
GCF_001485105	NZ_BCMK01000039.1	3	25380	25659	3.6e-125	0.99	280	AACb	no	no	no	no	no
GCF_001485105	NZ_BCMK01000052.1	3	14435	14719	1.1999999999999999e-43	0.97	285	APHb	no	no	no	no	no
GCF_001485105	NZ_BCMK01000092.1	1	11327	11616	4.3e-97	0.96	290	APHb	no	no	no	no	no
GCF_001949645	NZ_BCML01000050.1	1	21109	21398	6.999999999999999e-97	0.96	290	APHb	no	no	no	no	no
GCF_001949645	NZ_BCML01000053.1	1	14460	14744	1.1e-43	0.97	285	APHb	no	no	no	no	no
GCF_001949645	NZ_BCML01000058.1	2	10332	10611	2.6e-125	0.99	280	AACb	no	no	no	no	no
GCF_001570725	NZ_BCNV01000001.1	3	184714	184887	5.8999999999999996e-49	0.97	174	AACg	no	no	no	no	no	amikacin, netilmicin, kanamycin, isepamicin, dibekacin, tobramycin, sisomicin
GCF_001569545	NZ_BCNZ01000065.1	-2	16610	16787	4.4e-93	0.99	178	AACa	no	no	no	yes	yes
GCF_001569545	NZ_BCNZ01000080.1	3	191985	192128	1.7e-66	0.99	144	AACf1	no	no	no	no	no
GCF_001569565	NZ_BCOA01000055.1	-2	16550	16727	3.7e-93	0.99	178	AACa	no	no	no	yes	yes
GCF_001569565	NZ_BCOA01000087.1	-2	52985	53128	1.6e-66	0.99	144	AACf1	no	no	no	no	no
GCF_001569585	NZ_BCOB01000082.1	-3	130729	130872	7.3e-66	0.99	144	AACf1	no	no	no	no	no
GCF_001569605	NZ_BCOC01000160.1	-2	47533	47676	3.1000000000000003e-66	0.99	144	AACf1	no	no	no	no	no
GCF_001569625	NZ_BCOD01000055.1	-1	147666	147809	9.2e-67	0.99	144	AACf1	no	no	no	no	no
GCF_001569645	NZ_BCOE01000077.1	-1	27070	27213	8.499999999999999e-68	0.99	144	AACf1	no	no	no	no	no
[truncated: 44,054 more rows]
