# Supplementary material for: Ecology, more than antibiotics consumption, is the major predictor for the global distribution of aminoglycoside-modifying enzymes
Source: eLife. 2023 Feb 14;12:e77015. doi: 10.7554/eLife.77015 (PMC9928423; doi:10.7554/eLife.77015)
Supplement: Source data 3. [file elife-77015-data3.csv]

Sampling_year	IMAGE24_Region	Biomes	CHG	Number_of_sampled_genes
1905	Rest South America	Human samples	AACf1	2
1921	Western Europe	Domestic animals	AACc	1
1939	Western Europe	Farms, cattles	AACf1	1
1939	Western Europe	Human samples	AACf1	1
1940	USA	Agrosystems	APHb	1
1940	USA	Soil	ANTa	1
1941	USA	Domestic animals	AACf1	1
1942	China+	Farms, cattles	AACf1	1
1944	China+	Clinical samples	AACf1	1
1944	Southeastern Asia	Clinical samples	AACf1	1
1944	USA	Soil	AACf1	1
1947	USA	Clinical samples	APHd1	1
1949	Turkey	Human samples	AACf1	2
1949	USA	Farms, cattles	AACc	1
1949	USA	Freshwater	AACf1	1
1950	Japan	Clinical samples	AACg	1
1951	India+	Agrosystems	AACf1	1
1951	Southern Africa	Agrosystems	AACf1	1
1952	Canada	Agrosystems	AACf1	1
1952	Western Africa	Farms, cattles	AACf1	1
1953	Oceania	Agrosystems	AACf1	2
1953	USA	Soil	APHb	1
1954	Japan	Soil	AACc	1
1955	China+	Clinical samples	AACf1	1
1955	Oceania	Flora, fauna	APHf	1
1956	China+	Farms, cattles	AACf1	1
1956	Oceania	Agrosystems	AACf1	1
1956	USA	Soil	AACg	1
1956	Western Europe	Agrosystems	AACf1	1
1957	USA	Human samples	AACg	1
1958	Southern Africa	Soil	AACc	1
1958	Southern Africa	Soil	APHb	1
1958	Western Africa	Human samples	AACf1	1
1958	Western Europe	Human samples	AACf1	1
1960	India+	Clinical samples	AACf1	1
1960	Oceania	Agrosystems	AACf1	1
1960	Western Europe	Soil	APHb	1
1961	Central Europe	Farms, cattles	AACf1	3
1961	Central Europe	Freshwater	AACf1	1
1961	Northern Africa	Human samples	AACf1	1
1961	Western Europe	Soil	APHb	1
1962	Rest South America	Clinical samples	AACf1	1
1963	USA	Domestic animals	APHf	1
1963	USA	Freshwater	AACa	1
1964	USA	Freshwater	AACd	1
1964	USA	Human samples	AACf1	2
1964	Western Europe	Farms, cattles	AACc	1
1964	Western Europe	Human samples	ANTa	2
1967	China+	Soil	AACc	1
1967	USA	Agrosystems	AACa	1
1967	Western Europe	Freshwater	AACg	1
1967	Western Europe	Human samples	ANTa	7
1968	Japan	Soil	AACc	1
1968	Japan	Soil	AACm	1
1970	Central Europe	Soil	AACi	1
1970	Japan	Human samples	APHf	1
1970	Japan	Soil	AACc	1
1970	USA	Soil	AACd	1
1970	USA	Soil	AACg	1
1971	Middle East	Human samples	AACf1	1
1972	Japan	Soil	AACc	1
1972	Southeastern Asia	Human samples	AACf1	1
1972	Western Europe	Human samples	AACf1	1
1973	Oceania	Clinical samples	ANTa	1
1973	Southeastern Asia	Human samples	AACf1	1
1973	USA	Clinical samples	AACf1	1
1973	USA	Human samples	AACf1	1
1973	Western Europe	Farms, cattles	AACf1	1
1973	Western Europe	Sludge, waste	AACf1	1
1974	Brazil	Agrosystems	APHf	1
1975	USA	Farms, cattles	APHf	1
1975	USA	Human samples	AACf1	1
1976	Indonesia+	Human samples	AACf1	1
1976	Middle East	Soil	AACg	1
1977	Japan	Soil	APHb	1
1977	USA	Human samples	AACf1	1
1978	India+	Farms, cattles	AACg	1
1978	USA	Agrosystems	APHb	1
1978	Western Europe	Clinical samples	AACf1	1
1979	USA	Clinical samples	AACf1	1
1979	USA	Clinical samples	ANTa	1
1979	USA	Clinical samples	APHd1	1
1979	USA	Freshwater	ANTa	1
1979	USA	Human samples	AACf1	2
1979	Western Europe	Clinical samples	APHf	2
1980	Eastern Africa	Human samples	AACf1	1
1980	Oceania	Clinical samples	AACf1	1
1980	Oceania	Human samples	AACf1	2
1980	USA	Clinical samples	APHd1	2
1980	USA	Farms, cattles	AACb	1
1980	USA	Farms, cattles	APHf	3
1980	USA	Freshwater	APHd1	1
1980	USA	Human samples	AACf1	1
1980	USA	Soil	AACf1	1
1980	Western Europe	Agrosystems	AACb	1
1980	Western Europe	Clinical samples	AACf1	1
1981	Canada	Clinical samples	APHd1	1
1981	Oceania	Clinical samples	AACg	1
1981	Oceania	Human samples	AACf1	3
1981	USA	Freshwater	APHd1	1
1981	Western Europe	Clinical samples	ANTa	1
1981	Western Europe	Human samples	AACf1	2
1981	Western Europe	Human samples	AACj	1
1982	Japan	Clinical samples	ANTb	1
1982	Oceania	Human samples	AACf1	3
1982	Rest Central America	Human habitat	APHd1	1
1982	Rest South America	Agrosystems	AACf1	1
1982	USA	Clinical samples	AACf1	1
1982	USA	Clinical samples	ANTa	1
1982	USA	Clinical samples	APHd1	2
1982	USA	Human samples	APHf	1
1982	Western Europe	Clinical samples	AACj	1
1982	Western Europe	Human samples	AACa	1
1982	Western Europe	Human samples	AACj	1
1983	Brazil	Clinical samples	AACf1	8
1983	Brazil	Clinical samples	ANTd	4
1983	Indonesia+	Human samples	AACf1	1
1983	Middle East	Agrosystems	AACf1	1
1983	Oceania	Human samples	AACf1	4
1983	USA	Agrosystems	AACb	1
1983	USA	Agrosystems	APHf	1
1983	USA	Clinical samples	AACf1	1
1983	USA	Farms, cattles	AACi	1
1983	USA	Farms, cattles	APHa	1
1983	USA	Human samples	AACf1	2
1983	Western Europe	Clinical samples	APHf	1
1983	Western Europe	Human habitat	ANTa	1
1983	Western Europe	Human habitat	APHd1	1
1984	Brazil	Clinical samples	AACe1	1
1984	Brazil	Clinical samples	AACf1	6
1984	Brazil	Clinical samples	ANTd	3
1984	Oceania	Human samples	AACf1	3
1984	USA	Clinical samples	AACf1	1
1984	Western Europe	Clinical samples	AACj	1
1984	Western Europe	Clinical samples	ANTa	1
1984	Western Europe	Clinical samples	ANTd	1
1984	Western Europe	Clinical samples	APHd1	1
1984	Western Europe	Human samples	ANTa	1
1985	Brazil	Clinical samples	AACf1	4
1985	Oceania	Human samples	AACf1	4
1985	USA	Clinical samples	AACb	1
1985	USA	Human samples	AACf1	1
1985	Western Europe	Clinical samples	AACe1	2
1985	Western Europe	Clinical samples	ANTd	1
1986	Brazil	Clinical samples	AACe1	4
1986	Brazil	Clinical samples	AACf1	9
1986	Oceania	Human samples	AACf1	2
1986	USA	Clinical samples	AACf1	2
1986	USA	Domestic animals	AACf1	1
1986	USA	Human samples	AACf1	1
1986	Western Europe	Clinical samples	ANTa	2
1986	Western Europe	Clinical samples	APHd1	2
1987	USA	Clinical samples	AACf1	1
1987	USA	Farms, cattles	AACf1	3
1987	USA	Farms, cattles	APHf	1
1987	Western Europe	Clinical samples	AACg	1
1987	Western Europe	Clinical samples	APHd1	1
1987	Western Europe	Human samples	AACf1	1
1987	Western Europe	Soil	AACi	1
1988	Brazil	Clinical samples	AACf1	1
1988	China+	Soil	AACb	1
1988	India+	Clinical samples	AACf1	1
1988	India+	Human samples	AACf1	1
1988	Southeastern Asia	Clinical samples	AACf1	2
1988	Southeastern Asia	Human samples	AACf1	1
1988	USA	Clinical samples	AACf1	1
1988	USA	Clinical samples	APHd1	1
1988	USA	Farms, cattles	AACb	1
1988	USA	Farms, cattles	AACi	3
1988	USA	Farms, cattles	APHa	2
1988	USA	Farms, cattles	APHf	2
1988	USA	Human habitat	AACf1	1
1988	Western Europe	Clinical samples	ANTa	4
1988	Western Europe	Clinical samples	ANTd	1
1988	Western Europe	Clinical samples	APHd1	2
1988	Western Europe	Clinical samples	APHf	3
1988	Western Europe	Farms, cattles	ANTd	1
1988	Western Europe	Human samples	AACf1	1
1989	Southeastern Asia	Clinical samples	AACf1	1
1989	Ukraine+	Farms, cattles	ANTa	1
1989	USA	Clinical samples	AACf1	1
1989	Western Europe	Clinical samples	ANTa	2
1989	Western Europe	Clinical samples	APHd1	8
1989	Western Europe	Clinical samples	APHf	2
1990	Asia-Stan	Agrosystems	ANTa	1
1990	Brazil	Clinical samples	AACf1	1
1990	Canada	Clinical samples	APHf	1
1990	Central Europe	Clinical samples	AACf1	1
1990	China+	Soil	AACg	1
1990	Oceania	Human samples	AACf1	1
1990	USA	Agrosystems	ANTa	1
1990	USA	Clinical samples	AACf1	1
1990	USA	Farms, cattles	AACb	10
1990	USA	Farms, cattles	AACf1	1
1990	USA	Farms, cattles	AACi	4
1990	USA	Farms, cattles	APHa	3
1990	USA	Farms, cattles	APHf	1
1990	Western Europe	Clinical samples	AACc	1
1990	Western Europe	Farms, cattles	AACf1	2
1990	Western Europe	Farms, cattles	ANTa	1
1990	Western Europe	Human samples	AACf1	5
1990	Western Europe	Human samples	AACg	1
1990	Western Europe	Human samples	AACj	1
1990	Western Europe	Human samples	ANTb	1
1991	Brazil	Clinical samples	AACf1	1
1991	Canada	Clinical samples	AACe1	1
1991	Canada	Clinical samples	APHf	1
1991	Oceania	Clinical samples	AACf1	2
1991	Oceania	Human samples	AACf1	2
1991	USA	Agrosystems	APHb	1
1991	USA	Clinical samples	AACe1	1
1991	USA	Clinical samples	ANTa	1
1991	USA	Clinical samples	APHf	8
1991	Western Europe	Clinical samples	AACe1	1
1991	Western Europe	Clinical samples	AACj	1
1991	Western Europe	Clinical samples	APHd1	3
1991	Western Europe	Clinical samples	APHf	2
1991	Western Europe	Farms, cattles	AACf1	5
1991	Western Europe	Human samples	AACf1	9
1992	Brazil	Agrosystems	APHf	1
1992	Brazil	Clinical samples	AACf1	2
1992	Canada	Clinical samples	AACe1	1
1992	Canada	Clinical samples	APHf	2
1992	Central Europe	Human samples	ANTb	1
1992	India+	Agrosystems	AACf1	1
1992	Japan	Agrosystems	ANTa	1
1992	Oceania	Clinical samples	AACf1	1
1992	Oceania	Farms, cattles	AACf1	1
1992	Oceania	Farms, cattles	APHb	1
1992	Oceania	Human samples	AACf1	8
1992	USA	Clinical samples	AACa	1
1992	USA	Clinical samples	AACb	1
1992	USA	Clinical samples	AACe1	1
1992	USA	Clinical samples	AACf1	1
1992	USA	Clinical samples	AACg	1
1992	USA	Clinical samples	AACh	1
1992	USA	Clinical samples	ANTd	1
1992	USA	Clinical samples	APHf	1
1992	USA	Farms, cattles	AACf1	1
1992	USA	Farms, cattles	ANTd	1
1992	USA	Farms, cattles	APHf	1
1992	Western Europe	Clinical samples	AACc	4
1992	Western Europe	Clinical samples	AACe1	8
1992	Western Europe	Clinical samples	ANTa	2
1992	Western Europe	Clinical samples	ANTd	6
1992	Western Europe	Clinical samples	APHd1	4
1992	Western Europe	Clinical samples	APHf	6
1992	Western Europe	Farms, cattles	AACf1	4
1992	Western Europe	Human samples	AACf1	12
1992	Western Europe	Human samples	AACg	1
1992	Western Europe	Human samples	ANTb	1
1993	Brazil	Clinical samples	AACf1	1
1993	Brazil	Human samples	AACg	1
1993	Canada	Clinical samples	AACe1	1
1993	Canada	Clinical samples	APHf	2
1993	Central Europe	Clinical samples	AACj	2
1993	Japan	Soil	ANTa	1
1993	Japan	Soil	ANTb	1
1993	Oceania	Clinical samples	AACf1	1
1993	Oceania	Human samples	AACf1	7
1993	Rest South America	Soil	AACc	1
1993	Rest South America	Soil	APHc	1
1993	Southeastern Asia	Clinical samples	AACf1	3
1993	Southeastern Asia	Human samples	AACf1	7
1993	USA	Clinical samples	AACe1	1
1993	USA	Clinical samples	ANTa	1
1993	USA	Clinical samples	APHf	1
1993	USA	Farms, cattles	AACb	2
1993	USA	Farms, cattles	APHf	1
1993	USA	Soil	AACg	1
1993	Western Europe	Clinical samples	AACc	2
1993	Western Europe	Clinical samples	AACe1	1
1993	Western Europe	Clinical samples	AACg	1
1993	Western Europe	Clinical samples	ANTa	3
1993	Western Europe	Clinical samples	ANTb	1
1993	Western Europe	Clinical samples	APHd1	3
1993	Western Europe	Clinical samples	APHf	4
1993	Western Europe	Domestic animals	AACd	1
1993	Western Europe	Farms, cattles	AACf1	8
1993	Western Europe	Farms, cattles	AACi	1
1993	Western Europe	Farms, cattles	ANTa	1
1993	Western Europe	Farms, cattles	APHa	1
1993	Western Europe	Human samples	AACf1	10
1993	Western Europe	Sludge, waste	AACa	1
1994	Brazil	Soil	AACg	1
1994	Canada	Clinical samples	APHf	10
1994	Central Europe	Clinical samples	AACf1	1
1994	Central Europe	Clinical samples	AACj	1
1994	Central Europe	Farms, cattles	AACf1	1
1994	Japan	Farms, cattles	AACf1	1
1994	Oceania	Clinical samples	AACf1	4
1994	Oceania	Human samples	AACf1	14
1994	Rest South America	Clinical samples	AACe1	1
1994	Rest South America	Clinical samples	AACh	1
1994	Southeastern Asia	Clinical samples	AACf1	1
1994	Southeastern Asia	Human samples	AACf1	51
1994	Southern Africa	Clinical samples	AACh	1
1994	USA	Clinical samples	AACf1	2
1994	USA	Clinical samples	ANTd	2
1994	USA	Farms, cattles	AACb	1
1994	Western Europe	Clinical samples	AACc	10
1994	Western Europe	Clinical samples	AACe1	1
1994	Western Europe	Clinical samples	ANTa	6
1994	Western Europe	Clinical samples	APHd1	12
1994	Western Europe	Clinical samples	APHf	1
1994	Western Europe	Domestic animals	AACf1	2
1994	Western Europe	Farms, cattles	AACf1	21
1994	Western Europe	Farms, cattles	AACi	1
1994	Western Europe	Farms, cattles	APHa	1
1994	Western Europe	Human samples	AACf1	16
1994	Western Europe	Human samples	AACg	1
1994	Western Europe	Soil	ANTa	1
1995	Brazil	Clinical samples	AACf1	1
1995	Brazil	Farms, cattles	AACf1	1
1995	Canada	Clinical samples	AACe1	2
1995	Canada	Clinical samples	APHf	4
1995	India+	Clinical samples	AACe1	1
1995	Oceania	Clinical samples	AACf1	3
1995	Oceania	Human samples	AACf1	2
1995	Oceania	Sludge, waste	AACj	1
1995	Rest South America	Clinical samples	AACc	1
1995	Southeastern Asia	Clinical samples	AACf1	1
1995	Southeastern Asia	Human samples	AACf1	20
1995	USA	Clinical samples	AACb	2
1995	USA	Clinical samples	AACf1	1
1995	USA	Clinical samples	AACg	1
1995	USA	Clinical samples	ANTa	1
1995	USA	Clinical samples	APHf	2
1995	USA	Farms, cattles	AACf1	1
1995	USA	Flora, fauna	AACb	3
1995	USA	Human samples	AACf1	1
1995	Western Europe	Agrosystems	AACi	1
1995	Western Europe	Clinical samples	AACc	12
1995	Western Europe	Clinical samples	AACe1	1
1995	Western Europe	Clinical samples	AACg	1
1995	Western Europe	Clinical samples	ANTa	12
1995	Western Europe	Clinical samples	APHd1	9
1995	Western Europe	Clinical samples	APHf	2
1995	Western Europe	Domestic animals	AACf1	1
1995	Western Europe	Farms, cattles	AACf1	18
1995	Western Europe	Freshwater	APHf	1
1995	Western Europe	Human samples	AACf1	21
1996	Brazil	Clinical samples	AACg	2
1996	Brazil	Clinical samples	ANTa	1
1996	Brazil	Farms, cattles	AACf1	1
1996	Brazil	Soil	AACm	1
1996	Canada	Clinical samples	AACe1	4
1996	Canada	Clinical samples	APHf	17
1996	Central Europe	Clinical samples	AACg	3
1996	China+	Agrosystems	ANTa	1
1996	China+	Clinical samples	AACf1	1
1996	China+	Farms, cattles	AACh	1
1996	India+	Clinical samples	APHf	1
1996	Japan	Clinical samples	AACg	1
1996	Japan	Clinical samples	ANTb	2
1996	Oceania	Clinical samples	AACf1	2
1996	Oceania	Human samples	AACf1	10
1996	Rest South America	Clinical samples	AACg	3
1996	Rest South America	Clinical samples	ANTa	2
1996	Rest South America	Farms, cattles	AACg	1
1996	Southeastern Asia	Agrosystems	AACf1	4
1996	Southeastern Asia	Clinical samples	AACf1	3
1996	Southeastern Asia	Farms, cattles	AACf1	2
1996	Southeastern Asia	Flora, fauna	AACf1	1
1996	Southeastern Asia	Human samples	AACf1	20
1996	USA	Human samples	AACg	1
1996	USA	Human samples	AACj	1
1996	Western Europe	Agrosystems	AACg	1
1996	Western Europe	Clinical samples	AACa	1
1996	Western Europe	Clinical samples	AACc	4
1996	Western Europe	Clinical samples	AACg	3
1996	Western Europe	Clinical samples	ANTa	9
1996	Western Europe	Clinical samples	ANTb	2
1996	Western Europe	Clinical samples	APHd1	7
1996	Western Europe	Clinical samples	APHf	1
1996	Western Europe	Farms, cattles	AACf1	18
1996	Western Europe	Farms, cattles	AACi	1
1996	Western Europe	Farms, cattles	APHa	1
1996	Western Europe	Human samples	AACf1	24
1997	Brazil	Clinical samples	AACe1	1
1997	Brazil	Clinical samples	AACf1	1
1997	Brazil	Farms, cattles	AACf1	1
1997	Canada	Clinical samples	AACe1	3
1997	Canada	Clinical samples	APHf	5
1997	Central Europe	Clinical samples	AACe1	2
1997	Central Europe	Clinical samples	AACf1	2
1997	Central Europe	Clinical samples	APHf	2
1997	Eastern Africa	Human samples	AACf1	1
1997	Oceania	Clinical samples	AACf1	3
1997	Oceania	Farms, cattles	AACf1	1
1997	Oceania	Farms, cattles	AACg	1
1997	Rest South America	Clinical samples	AACe1	1
1997	Southeastern Asia	Farms, cattles	AACf1	10
1997	Southeastern Asia	Human samples	AACf1	21
1997	Southern Africa	Clinical samples	AACf1	1
1997	Turkey	Clinical samples	AACa	1
1997	Turkey	Clinical samples	AACe1	1
1997	Turkey	Clinical samples	ANTd	1
1997	Turkey	Clinical samples	APHf	2
1997	USA	Clinical samples	AACc	2
1997	USA	Clinical samples	AACd	1
1997	USA	Clinical samples	AACe1	1
1997	USA	Clinical samples	ANTa	1
1997	USA	Clinical samples	APHf	3
1997	USA	Farms, cattles	AACb	1
1997	USA	Farms, cattles	AACf1	2
1997	USA	Farms, cattles	AACi	1
1997	USA	Farms, cattles	APHa	1
1997	USA	Human samples	AACf1	1
1997	USA	Human samples	AACh	1
1997	USA	Human samples	ANTd	1
1997	USA	Human samples	APHf	1
1997	Western Europe	Clinical samples	AACa	1
1997	Western Europe	Clinical samples	AACc	9
1997	Western Europe	Clinical samples	AACd	1
1997	Western Europe	Clinical samples	AACe1	6
1997	Western Europe	Clinical samples	AACf1	1
1997	Western Europe	Clinical samples	AACi	1
1997	Western Europe	Clinical samples	ANTd	2
1997	Western Europe	Clinical samples	APHf	2
1997	Western Europe	Domestic animals	AACf1	1
1997	Western Europe	Farms, cattles	AACf1	9
1997	Western Europe	Farms, cattles	AACi	2
1997	Western Europe	Farms, cattles	ANTa	1
1997	Western Europe	Farms, cattles	APHa	2
1997	Western Europe	Human samples	AACf1	19
1998	Brazil	Agrosystems	AACf1	1
1998	Brazil	Clinical samples	AACf1	1
1998	Canada	Clinical samples	AACe1	2
1998	Canada	Clinical samples	APHf	2
1998	China+	Clinical samples	AACc	1
1998	China+	Clinical samples	AACf1	1
1998	China+	Human samples	AACf1	5
1998	Eastern Africa	Human samples	AACf1	1
1998	Northern Africa	Clinical samples	APHf	1
1998	Oceania	Clinical samples	AACf1	2
1998	Oceania	Clinical samples	AACg	1
1998	Oceania	Clinical samples	ANTa	1
1998	Oceania	Farms, cattles	AACf1	1
1998	Oceania	Farms, cattles	ANTd	1
1998	Oceania	Human samples	AACf1	6
1998	Oceania	Soil	AACb	1
1998	Oceania	Soil	APHf	2
1998	Rest South America	Clinical samples	AACc	1
1998	Rest South America	Human samples	AACf1	1
1998	Russia+	Clinical samples	AACg	2
1998	Russia+	Soil	AACg	1
1998	Southeastern Asia	Human samples	AACf1	8
1998	Southern Africa	Clinical samples	AACf1	1
1998	USA	Agrosystems	AACf1	1
1998	USA	Farms, cattles	AACh	1
1998	Western Africa	Human samples	AACf1	3
1998	Western Europe	Agrosystems	AACb	1
1998	Western Europe	Agrosystems	APHf	1
1998	Western Europe	Clinical samples	AACc	10
1998	Western Europe	Clinical samples	AACe1	1
1998	Western Europe	Clinical samples	APHd1	1
1998	Western Europe	Domestic animals	ANTa	1
1998	Western Europe	Farms, cattles	AACf1	7
1998	Western Europe	Farms, cattles	AACg	1
1998	Western Europe	Human samples	AACd	1
1998	Western Europe	Human samples	AACf1	16
1998	Western Europe	Human samples	AACg	2
1998	Western Europe	Human samples	ANTa	1
1999	Brazil	Agrosystems	APHf	1
1999	Brazil	Clinical samples	AACf1	1
1999	Canada	Clinical samples	APHf	1
1999	Canada	Human samples	AACf1	5
1999	China+	Clinical samples	AACh	1
1999	China+	Clinical samples	AACj	1
1999	China+	Farms, cattles	AACf1	1
1999	China+	Farms, cattles	AACh	1
1999	China+	Soil	AACg	1
1999	Indonesia+	Freshwater	ANTa	1
1999	Northern Africa	Human samples	AACf1	3
1999	Oceania	Clinical samples	AACf1	1
1999	Oceania	Human samples	AACf1	1
1999	Oceania	Human samples	AACj	2
1999	Oceania	Human samples	ANTd	2
1999	Rest South America	Human samples	AACf1	1
1999	Southeastern Asia	Clinical samples	AACf1	1
1999	Southeastern Asia	Human samples	AACf1	1
1999	Southern Africa	Agrosystems	APHb	1
1999	Southern Africa	Clinical samples	AACf1	2
1999	USA	Clinical samples	AACc	3
1999	USA	Clinical samples	AACf1	3
1999	USA	Clinical samples	AACg	4
1999	USA	Clinical samples	ANTb	5
1999	USA	Farms, cattles	AACb	1
1999	USA	Farms, cattles	AACc	1
1999	USA	Farms, cattles	AACf1	3
1999	USA	Farms, cattles	ANTd	1
1999	USA	Farms, cattles	APHb	1
1999	USA	Human samples	AACg	1
1999	USA	Human samples	AACh	1
1999	USA	Human samples	ANTb	1
1999	USA	Human samples	ANTd	2
1999	Western Africa	Human samples	AACf1	2
1999	Western Europe	Clinical samples	AACc	14
1999	Western Europe	Clinical samples	AACe1	1
1999	Western Europe	Clinical samples	ANTa	4
1999	Western Europe	Clinical samples	APHd1	6
1999	Western Europe	Farms, cattles	AACd	1
1999	Western Europe	Farms, cattles	AACf1	5
1999	Western Europe	Human samples	AACf1	11
1999	Western Europe	Human samples	AACg	1
1999	Western Europe	Human samples	ANTb	1
1999	Western Europe	Human samples	APHf	1
2000	Brazil	Clinical samples	AACf1	2
2000	Brazil	Farms, cattles	AACf1	1
2000	Canada	Clinical samples	AACc	1
2000	Canada	Clinical samples	AACe1	2
2000	Canada	Clinical samples	APHf	3
2000	Canada	Farms, cattles	AACf1	1
2000	Canada	Human samples	AACf1	10
2000	Canada	Human samples	AACi	1
2000	Canada	Human samples	APHa	1
2000	China+	Clinical samples	AACc	1
2000	China+	Clinical samples	AACf1	1
2000	China+	Farms, cattles	AACf1	3
2000	China+	Freshwater	AACd	1
2000	China+	Human samples	AACf1	5
2000	China+	Human samples	AACi	1
2000	China+	Human samples	APHa	1
2000	China+	Soil	AACm	1
2000	Indonesia+	Human samples	AACf1	1
2000	Japan	Sludge, waste	AACa	1
2000	Mexico	Agrosystems	AACb	1
2000	Mexico	Clinical samples	AACf1	1
2000	Northern Africa	Human samples	AACf1	5
2000	Oceania	Clinical samples	AACa	1
2000	Oceania	Clinical samples	AACc	1
2000	Oceania	Clinical samples	AACf1	5
2000	Oceania	Clinical samples	AACj	2
2000	Rest South America	Human samples	AACf1	1
2000	Southeastern Asia	Clinical samples	AACc	1
2000	Southeastern Asia	Clinical samples	AACf1	2
2000	Southeastern Asia	Clinical samples	ANTa	3
2000	Southeastern Asia	Human samples	AACf1	5
2000	Southeastern Asia	Soil	AACf1	1
2000	Southern Africa	Clinical samples	AACf1	1
2000	USA	Clinical samples	AACc	1
2000	USA	Clinical samples	AACf1	2
2000	USA	Clinical samples	AACg	2
2000	USA	Clinical samples	ANTa	2
2000	USA	Clinical samples	ANTb	1
2000	USA	Farms, cattles	AACb	1
2000	USA	Farms, cattles	AACf1	3
2000	USA	Farms, cattles	ANTd	2
2000	USA	Freshwater	AACc	1
2000	USA	Human samples	AACf1	2
2000	Western Africa	Human samples	AACf1	1
2000	Western Europe	Clinical samples	AACc	5
2000	Western Europe	Clinical samples	AACd	2
2000	Western Europe	Clinical samples	AACf1	2
2000	Western Europe	Clinical samples	ANTa	3
2000	Western Europe	Clinical samples	APHd1	3
2000	Western Europe	Farms, cattles	AACf1	1
2000	Western Europe	Flora, fauna	AACg	1
2000	Western Europe	Human samples	AACf1	6
2000	Western Europe	Human samples	ANTa	1
2001	Canada	Clinical samples	AACf1	1
2001	Canada	Human samples	AACf1	28
2001	Canada	Human samples	AACi	1
2001	Canada	Human samples	APHa	1
2001	Central Europe	Clinical samples	AACf1	3
2001	China+	Clinical samples	AACf1	1
2001	China+	Farms, cattles	AACh	2
2001	China+	Human samples	AACf1	1
2001	Eastern Africa	Human samples	AACf1	1
2001	India+	Human samples	AACf1	1
2001	Mexico	Clinical samples	AACc	1
2001	Oceania	Clinical samples	AACc	2
2001	Oceania	Clinical samples	AACf1	8
2001	Oceania	Clinical samples	AACg	1
2001	Oceania	Farms, cattles	AACf1	1
2001	Oceania	Human samples	AACf1	3
2001	Rest South America	Clinical samples	AACg	15
2001	Rest South America	Clinical samples	ANTa	16
2001	Rest South America	Human samples	AACf1	1
2001	Southeastern Asia	Clinical samples	AACf1	1
2001	Southeastern Asia	Clinical samples	ANTa	6
2001	Southeastern Asia	Human samples	AACf1	2
2001	Turkey	Human samples	AACf1	1
2001	USA	Clinical samples	AACg	2
2001	USA	Clinical samples	ANTb	7
2001	USA	Clinical samples	ANTd	1
2001	USA	Farms, cattles	AACb	2
2001	USA	Farms, cattles	AACf1	4
2001	USA	Farms, cattles	AACi	1
2001	USA	Farms, cattles	APHa	1
2001	USA	Farms, cattles	APHf	2
2001	USA	Human samples	AACf1	5
2001	USA	Human samples	AACg	1
2001	Western Europe	Clinical samples	AACa	1
2001	Western Europe	Clinical samples	AACc	34
2001	Western Europe	Clinical samples	AACd	1
2001	Western Europe	Clinical samples	AACe1	2
2001	Western Europe	Clinical samples	AACf1	1
2001	Western Europe	Clinical samples	ANTb	1
2001	Western Europe	Clinical samples	ANTd	1
2001	Western Europe	Clinical samples	APHd1	1
2001	Western Europe	Farms, cattles	AACd	1
2001	Western Europe	Farms, cattles	AACf1	2
2001	Western Europe	Human samples	AACf1	6
2001	Western Europe	Human samples	ANTa	1
2002	Brazil	Clinical samples	AACc	2
2002	Brazil	Clinical samples	AACe1	2
2002	Brazil	Clinical samples	AACg	1
2002	Brazil	Clinical samples	ANTa	1
2002	Canada	Clinical samples	APHf	2
2002	Canada	Farms, cattles	AACf1	1
2002	Canada	Human samples	AACf1	7
2002	China+	Farms, cattles	AACf1	1
2002	China+	Farms, cattles	AACh	3
2002	China+	Farms, cattles	ANTa	1
2002	China+	Human samples	AACf1	10
2002	Eastern Africa	Human samples	AACf1	2
2002	India+	Human samples	AACf1	1
2002	Indonesia+	Human samples	AACf1	2
2002	Japan	Soil	AACf1	1
2002	Mexico	Clinical samples	AACf1	2
2002	Middle East	Clinical samples	AACh	1
2002	Northern Africa	Human samples	AACe1	1
2002	Northern Africa	Human samples	AACh	1
2002	Oceania	Clinical samples	AACa	2
2002	Oceania	Clinical samples	AACc	5
2002	Oceania	Clinical samples	AACf1	1
2002	Oceania	Clinical samples	AACj	6
2002	Oceania	Clinical samples	ANTd	2
2002	Oceania	Human samples	AACf1	3
2002	Rest South America	Clinical samples	AACg	4
2002	Rest South America	Clinical samples	ANTa	3
2002	Rest South America	Human samples	AACf1	1
2002	Rest South America	Soil	APHf	1
2002	Southeastern Asia	Clinical samples	AACf1	5
2002	Southeastern Asia	Clinical samples	ANTa	2
2002	Southeastern Asia	Domestic animals	AACf1	1
2002	Southeastern Asia	Human samples	AACf1	12
2002	Southern Africa	Clinical samples	AACc	1
2002	Southern Africa	Clinical samples	AACf1	1
2002	USA	Clinical samples	AACc	3
2002	USA	Clinical samples	AACe1	1
2002	USA	Clinical samples	AACi	2
2002	USA	Clinical samples	ANTb	1
2002	USA	Clinical samples	APHa	2
2002	USA	Farms, cattles	AACb	2
2002	USA	Farms, cattles	AACf1	13
2002	USA	Farms, cattles	ANTd	1
2002	USA	Farms, cattles	APHf	1
2002	USA	Human samples	AACc	2
2002	USA	Human samples	AACf1	2
2002	Western Africa	Human samples	AACf1	3
2002	Western Europe	Agrosystems	AACf1	1
2002	Western Europe	Agrosystems	AACg	1
2002	Western Europe	Clinical samples	AACc	16
2002	Western Europe	Clinical samples	AACd	1
2002	Western Europe	Clinical samples	AACe1	7
2002	Western Europe	Clinical samples	AACf1	5
2002	Western Europe	Clinical samples	AACg	5
2002	Western Europe	Clinical samples	AACh	7
2002	Western Europe	Clinical samples	ANTa	11
2002	Western Europe	Clinical samples	ANTb	14
2002	Western Europe	Clinical samples	ANTd	1
2002	Western Europe	Clinical samples	APHd1	10
2002	Western Europe	Farms, cattles	AACd	1
2002	Western Europe	Farms, cattles	AACf1	7
2002	Western Europe	Freshwater	APHf	1
2002	Western Europe	Human samples	AACf1	10
2003	Brazil	Clinical samples	AACe1	1
2003	Brazil	Clinical samples	AACf1	1
2003	Brazil	Clinical samples	AACj	1
2003	Brazil	Clinical samples	ANTd	1
2003	Canada	Clinical samples	APHf	1
2003	Canada	Farms, cattles	AACf1	1
2003	Central Europe	Clinical samples	AACe1	1
2003	China+	Agrosystems	ANTa	1
2003	China+	Clinical samples	AACf1	1
2003	China+	Clinical samples	AACj	1
2003	China+	Farms, cattles	AACh	1
2003	China+	Freshwater	AACf1	1
2003	India+	Human samples	AACf1	20
2003	Indonesia+	Human samples	AACf1	2
2003	Korea	Clinical samples	AACe1	1
2003	Korea	Clinical samples	AACh	2
2003	Northern Africa	Human samples	AACe1	1
2003	Oceania	Clinical samples	AACc	8
2003	Oceania	Clinical samples	AACf1	14
2003	Oceania	Clinical samples	AACg	1
2003	Oceania	Clinical samples	ANTb	1
2003	Oceania	Human samples	AACf1	1
2003	Oceania	Human samples	ANTb	1
2003	Rest Central America	Clinical samples	AACc	13
2003	Rest South America	Clinical samples	AACf1	1
2003	Southeastern Asia	Clinical samples	AACc	2
2003	Southeastern Asia	Clinical samples	ANTa	1
2003	Southeastern Asia	Human samples	AACf1	15
2003	Southeastern Asia	Human samples	AACi	1
2003	USA	Clinical samples	AACc	3
2003	USA	Clinical samples	AACe1	2
2003	USA	Clinical samples	AACg	23
2003	USA	Clinical samples	AACh	2
2003	USA	Clinical samples	AACj	4
2003	USA	Clinical samples	ANTa	1
2003	USA	Clinical samples	ANTb	298
2003	USA	Clinical samples	ANTd	5
2003	USA	Clinical samples	APHf	1
2003	USA	Domestic animals	AACf1	1
2003	USA	Domestic animals	AACg	1
2003	USA	Domestic animals	ANTb	1
2003	USA	Farms, cattles	AACb	5
2003	USA	Farms, cattles	AACe1	1
2003	USA	Farms, cattles	AACf1	12
2003	USA	Farms, cattles	AACh	1
2003	USA	Farms, cattles	AACi	1
2003	USA	Farms, cattles	APHa	1
2003	USA	Farms, cattles	APHf	2
2003	USA	Human habitat	APHf	2
2003	USA	Human samples	AACg	1
2003	USA	Human samples	AACj	3
2003	USA	Human samples	ANTb	17
2003	USA	Sludge, waste	APHf	1
2003	USA	Soil	AACc	1
2003	Western Europe	Agrosystems	AACf1	1
2003	Western Europe	Clinical samples	AACc	26
2003	Western Europe	Clinical samples	AACe1	14
2003	Western Europe	Clinical samples	AACf1	9
2003	Western Europe	Clinical samples	AACg	1
2003	Western Europe	Clinical samples	AACh	14
2003	Western Europe	Clinical samples	AACj	3
2003	Western Europe	Clinical samples	ANTd	3
2003	Western Europe	Clinical samples	APHd1	1
2003	Western Europe	Clinical samples	APHf	1
2003	Western Europe	Farms, cattles	AACf1	6
2003	Western Europe	Farms, cattles	AACi	1
2003	Western Europe	Farms, cattles	ANTa	1
2003	Western Europe	Farms, cattles	APHa	1
2003	Western Europe	Human samples	AACf1	8
2003	Western Europe	Human samples	AACj	1
2003	Western Europe	Soil	AACf1	3
2004	Brazil	Clinical samples	AACc	1
2004	Brazil	Clinical samples	AACe1	4
2004	Brazil	Clinical samples	AACj	2
2004	Brazil	Clinical samples	ANTd	2
2004	Brazil	Farms, cattles	AACf1	1
2004	Canada	Clinical samples	AACf1	1
2004	Canada	Clinical samples	APHf	1
2004	Canada	Farms, cattles	AACf1	10
2004	Central Europe	Clinical samples	ANTb	1
2004	Central Europe	Farms, cattles	AACf1	1
2004	China+	Clinical samples	AACj	1
2004	China+	Farms, cattles	AACe1	1
2004	China+	Farms, cattles	AACh	1
2004	China+	Human samples	AACf1	2
2004	China+	Human samples	AACi	1
2004	China+	Human samples	APHa	1
2004	China+	Soil	AACc	1
2004	China+	Soil	AACh	1
2004	Eastern Africa	Human samples	AACf1	1
2004	India+	Clinical samples	AACb	2
2004	India+	Clinical samples	AACf1	1
2004	India+	Clinical samples	APHf	1
2004	Indonesia+	Human samples	AACf1	2
2004	Japan	Clinical samples	ANTd	1
2004	Middle East	Clinical samples	AACh	1
2004	Oceania	Clinical samples	AACc	12
2004	Oceania	Clinical samples	AACf1	2
2004	Oceania	Farms, cattles	AACf1	6
2004	Oceania	Human samples	AACf1	5
2004	Rest Central America	Clinical samples	AACc	10
2004	Rest South America	Clinical samples	AACg	2
2004	Rest South America	Farms, cattles	AACf1	2
2004	Rest South America	Flora, fauna	AACc	1
2004	Rest South America	Human samples	AACf1	1
2004	Russia+	Farms, cattles	ANTa	1
2004	Russia+	Farms, cattles	ANTb	1
2004	Southeastern Asia	Clinical samples	AACc	1
2004	Southeastern Asia	Clinical samples	AACf1	5
2004	Southeastern Asia	Clinical samples	ANTa	4
2004	Southeastern Asia	Human samples	AACf1	5
2004	Southeastern Asia	Soil	AACc	1
2004	Southern Africa	Clinical samples	AACf1	2
2004	Southern Africa	Human samples	AACf1	2
2004	Ukraine+	Human samples	AACf1	1
2004	USA	Agrosystems	ANTb	1
2004	USA	Clinical samples	AACa	3
2004	USA	Clinical samples	AACb	1
2004	USA	Clinical samples	AACc	3
2004	USA	Clinical samples	AACf1	1
2004	USA	Clinical samples	AACg	31
2004	USA	Clinical samples	AACh	1
2004	USA	Clinical samples	AACj	5
2004	USA	Clinical samples	ANTa	1
2004	USA	Clinical samples	ANTb	479
2004	USA	Clinical samples	ANTd	4
2004	USA	Clinical samples	ANTe	5
2004	USA	Clinical samples	APHd1	1
2004	USA	Clinical samples	APHf	1
2004	USA	Domestic animals	AACh	1
2004	USA	Farms, cattles	AACb	3
2004	USA	Farms, cattles	AACf1	9
2004	USA	Farms, cattles	ANTd	2
2004	USA	Freshwater	AACc	1
2004	USA	Human habitat	AACc	1
2004	USA	Human habitat	ANTa	1
2004	USA	Human habitat	APHd1	2
2004	USA	Human habitat	APHf	1
2004	USA	Human samples	AACc	1
2004	USA	Human samples	AACg	5
2004	USA	Human samples	ANTb	99
2004	USA	Human samples	ANTd	1
2004	USA	Human samples	ANTe	1
2004	Western Africa	Human samples	AACf1	4
2004	Western Europe	Clinical samples	AACc	45
2004	Western Europe	Clinical samples	AACe1	21
2004	Western Europe	Clinical samples	AACf1	18
2004	Western Europe	Clinical samples	AACg	2
2004	Western Europe	Clinical samples	AACh	15
2004	Western Europe	Clinical samples	AACi	1
2004	Western Europe	Clinical samples	AACj	4
2004	Western Europe	Clinical samples	ANTa	7
2004	Western Europe	Clinical samples	ANTb	5
2004	Western Europe	Clinical samples	ANTd	6
2004	Western Europe	Clinical samples	APHa	1
2004	Western Europe	Clinical samples	APHd1	6
2004	Western Europe	Clinical samples	APHf	1
2004	Western Europe	Farms, cattles	AACf1	9
2004	Western Europe	Farms, cattles	ANTa	2
2004	Western Europe	Farms, cattles	APHb	2
2004	Western Europe	Flora, fauna	AACg	1
2004	Western Europe	Human samples	AACe1	1
2004	Western Europe	Human samples	AACf1	4
2004	Western Europe	Human samples	APHf	1
2005	Brazil	Clinical samples	AACe1	1
2005	Brazil	Clinical samples	AACf1	1
2005	Brazil	Clinical samples	APHf	1
2005	Canada	Clinical samples	ANTa	1
2005	Canada	Clinical samples	APHd1	1
2005	Canada	Clinical samples	APHf	1
2005	Canada	Farms, cattles	AACf1	20
2005	Central Europe	Clinical samples	AACc	2
2005	China+	Clinical samples	AACa	1
2005	China+	Clinical samples	AACe1	2
2005	China+	Clinical samples	AACh	4
2005	China+	Clinical samples	AACj	1
2005	China+	Clinical samples	ANTa	1
2005	China+	Farms, cattles	ANTa	1
2005	China+	Freshwater	APHd1	1
2005	China+	Soil	ANTa	2
2005	India+	Agrosystems	APHf	1
2005	India+	Farms, cattles	AACf1	1
2005	India+	Soil	ANTa	1
2005	Indonesia+	Human samples	AACf1	4
2005	Mexico	Clinical samples	AACc	1
2005	Mexico	Clinical samples	AACf1	2
2005	Middle East	Clinical samples	AACe1	1
2005	Middle East	Clinical samples	AACf1	2
2005	Middle East	Clinical samples	AACh	2
2005	Middle East	Clinical samples	AACj	3
2005	Middle East	Soil	ANTa	1
2005	Northern Africa	Clinical samples	AACg	1
2005	Northern Africa	Clinical samples	ANTa	1
2005	Oceania	Clinical samples	AACc	11
2005	Oceania	Clinical samples	AACf1	1
2005	Oceania	Clinical samples	AACg	1
2005	Oceania	Clinical samples	ANTb	1
2005	Oceania	Farms, cattles	AACf1	3
2005	Oceania	Farms, cattles	APHf	1
2005	Oceania	Human samples	AACf1	1
2005	Rest Central America	Clinical samples	AACc	3
2005	Rest South America	Clinical samples	AACg	6
2005	Rest South America	Clinical samples	ANTa	1
2005	Southeastern Asia	Clinical samples	ANTa	10
2005	Southeastern Asia	Domestic animals	AACf1	3
2005	Southeastern Asia	Farms, cattles	AACf1	1
2005	Southeastern Asia	Human samples	AACf1	1
2005	Southern Africa	Human samples	AACf1	4
2005	USA	Clinical samples	AACa	1
2005	USA	Clinical samples	AACb	1
2005	USA	Clinical samples	AACc	10
2005	USA	Clinical samples	AACd	2
2005	USA	Clinical samples	AACe1	33
2005	USA	Clinical samples	AACf1	6
2005	USA	Clinical samples	AACg	6
2005	USA	Clinical samples	AACh	6
2005	USA	Clinical samples	AACj	16
2005	USA	Clinical samples	ANTa	2
2005	USA	Clinical samples	ANTb	13
2005	USA	Clinical samples	ANTd	24
2005	USA	Clinical samples	APHd1	2
2005	USA	Clinical samples	APHf	47
2005	USA	Domestic animals	AACf1	1
2005	USA	Farms, cattles	AACb	4
2005	USA	Farms, cattles	AACf1	11
2005	USA	Farms, cattles	AACg	4
2005	USA	Farms, cattles	AACi	1
2005	USA	Farms, cattles	ANTa	1
2005	USA	Farms, cattles	ANTd	1
2005	USA	Farms, cattles	APHa	1
2005	USA	Freshwater	AACd	1
2005	USA	Freshwater	ANTa	1
2005	USA	Human samples	AACb	2
2005	USA	Human samples	AACc	1
2005	USA	Human samples	AACe1	2
2005	USA	Human samples	AACf1	3
2005	USA	Human samples	AACj	3
2005	USA	Human samples	ANTb	4
2005	USA	Sludge, waste	AACf1	1
2005	USA	Sludge, waste	APHf	1
2005	USA	Soil	APHb	1
2005	Western Africa	Human samples	AACf1	2
2005	Western Europe	Clinical samples	AACa	1
2005	Western Europe	Clinical samples	AACc	25
2005	Western Europe	Clinical samples	AACe1	19
2005	Western Europe	Clinical samples	AACf1	16
2005	Western Europe	Clinical samples	AACg	3
2005	Western Europe	Clinical samples	AACh	12
2005	Western Europe	Clinical samples	AACj	1
2005	Western Europe	Clinical samples	ANTa	4
2005	Western Europe	Clinical samples	ANTb	11
2005	Western Europe	Clinical samples	ANTd	4
2005	Western Europe	Clinical samples	APHd1	4
2005	Western Europe	Farms, cattles	AACf1	10
2005	Western Europe	Farms, cattles	AACg	1
2005	Western Europe	Farms, cattles	ANTa	1
2005	Western Europe	Farms, cattles	ANTb	2
2005	Western Europe	Freshwater	APHd1	1
2005	Western Europe	Human samples	AACf1	6
2006	Brazil	Clinical samples	AACe1	1
2006	Brazil	Farms, cattles	AACf1	12
2006	Brazil	Farms, cattles	AACi	1
2006	Brazil	Farms, cattles	APHa	1
2006	Canada	Clinical samples	APHf	4
2006	Canada	Farms, cattles	AACf1	30
2006	Central Europe	Soil	ANTa	1
2006	China+	Agrosystems	AACf1	1
2006	China+	Clinical samples	AACc	1
2006	China+	Clinical samples	AACe1	2
2006	China+	Clinical samples	AACh	2
2006	China+	Clinical samples	ANTd	2
2006	China+	Clinical samples	APHf	1
2006	China+	Farms, cattles	AACf1	1
2006	China+	Farms, cattles	AACh	1
2006	China+	Soil	AACf1	1
2006	India+	Clinical samples	AACe1	2
2006	India+	Clinical samples	AACh	3
2006	India+	Human samples	AACg	1
2006	Indonesia+	Human samples	AACf1	7
2006	Korea	Clinical samples	AACf1	1
2006	Korea	Clinical samples	AACh	1
2006	Mexico	Clinical samples	AACg	2
2006	Mexico	Clinical samples	ANTb	2
2006	Middle East	Clinical samples	AACf1	1
2006	Middle East	Human samples	AACf1	1
2006	Oceania	Clinical samples	AACc	13
2006	Oceania	Clinical samples	AACe1	1
2006	Oceania	Clinical samples	AACf1	1
2006	Oceania	Clinical samples	AACj	1
2006	Oceania	Clinical samples	APHf	2
2006	Oceania	Farms, cattles	AACf1	3
2006	Oceania	Human samples	AACf1	1
2006	Oceania	Soil	AACf1	7
2006	Rest Central America	Agrosystems	AACf1	1
2006	Rest Central America	Clinical samples	AACc	10
2006	Rest South America	Clinical samples	AACc	2
2006	Rest South America	Clinical samples	AACg	15
2006	Rest South America	Clinical samples	ANTa	19
2006	Rest South America	Human samples	AACf1	1
2006	Russia+	Farms, cattles	AACc	1
2006	Russia+	Freshwater	AACf1	1
2006	Southeastern Asia	Clinical samples	AACf1	75
2006	Southeastern Asia	Clinical samples	AACg	1
2006	Southeastern Asia	Clinical samples	ANTa	7
2006	Southeastern Asia	Farms, cattles	ANTa	8
2006	Southern Africa	Human samples	AACf1	6
2006	Turkey	Clinical samples	AACg	9
2006	Turkey	Clinical samples	AACj	1
2006	Turkey	Farms, cattles	AACb	1
2006	Turkey	Farms, cattles	AACf1	2
2006	USA	Clinical samples	AACa	1
2006	USA	Clinical samples	AACc	3
2006	USA	Clinical samples	AACe1	5
2006	USA	Clinical samples	AACf1	9
2006	USA	Clinical samples	AACg	4
2006	USA	Clinical samples	AACh	7
2006	USA	Clinical samples	AACj	8
2006	USA	Clinical samples	ANTd	6
2006	USA	Clinical samples	APHd1	3
2006	USA	Clinical samples	APHf	3
2006	USA	Farms, cattles	AACf1	7
2006	USA	Farms, cattles	AACg	4
2006	USA	Farms, cattles	APHf	2
2006	USA	Freshwater	AACf1	2
2006	USA	Freshwater	APHf	1
2006	USA	Human habitat	AACf1	4
2006	USA	Human habitat	APHf	4
2006	USA	Human samples	AACf1	4
2006	USA	Human samples	AACg	1
2006	USA	Human samples	AACj	3
2006	USA	Human samples	ANTa	1
2006	USA	Sludge, waste	AACe1	1
2006	USA	Sludge, waste	AACh	1
2006	USA	Soil	AACf1	1
2006	USA	Soil	AACg	1
2006	USA	Soil	ANTb	1
2006	Western Africa	Human samples	AACf1	7
2006	Western Europe	Clinical samples	AACc	31
2006	Western Europe	Clinical samples	AACd	1
2006	Western Europe	Clinical samples	AACe1	19
2006	Western Europe	Clinical samples	AACf1	14
2006	Western Europe	Clinical samples	AACg	6
2006	Western Europe	Clinical samples	AACh	18
2006	Western Europe	Clinical samples	AACj	3
2006	Western Europe	Clinical samples	ANTa	14
2006	Western Europe	Clinical samples	ANTb	5
2006	Western Europe	Clinical samples	ANTd	2
2006	Western Europe	Clinical samples	ANTe	1
2006	Western Europe	Clinical samples	APHd1	23
2006	Western Europe	Clinical samples	APHf	1
2006	Western Europe	Farms, cattles	AACd	2
2006	Western Europe	Farms, cattles	AACf1	4
2006	Western Europe	Farms, cattles	AACg	2
2006	Western Europe	Farms, cattles	ANTb	2
2006	Western Europe	Freshwater	AACf1	1
2006	Western Europe	Human samples	AACf1	3
2006	Western Europe	Human samples	AACh	2
2006	Western Europe	Human samples	ANTa	1
2006	Western Europe	Human samples	ANTb	1
2006	Western Europe	Human samples	APHd1	1
2007	Brazil	Clinical samples	AACc	1
2007	Brazil	Clinical samples	AACe1	6
2007	Brazil	Clinical samples	AACh	1
2007	Canada	Clinical samples	AACa	1
2007	Canada	Clinical samples	AACj	1
2007	Canada	Clinical samples	APHf	2
2007	Central Europe	Clinical samples	AACe1	3
2007	Central Europe	Clinical samples	AACf1	1
2007	Central Europe	Clinical samples	APHf	2
2007	Central Europe	Human samples	AACg	1
2007	China+	Agrosystems	ANTb	1
2007	China+	Clinical samples	AACc	3
2007	China+	Clinical samples	AACf1	1
2007	China+	Clinical samples	AACj	1
2007	China+	Farms, cattles	AACe1	1
2007	China+	Farms, cattles	AACh	1
2007	China+	Farms, cattles	AACi	1
2007	China+	Farms, cattles	ANTa	1
2007	China+	Farms, cattles	APHa	1
2007	China+	Flora, fauna	APHb	1
2007	China+	Human samples	AACf1	2
2007	China+	Soil	ANTa	1
2007	China+	Soil	ANTb	1
2007	Eastern Africa	Human samples	AACf1	15
2007	India+	Clinical samples	AACe1	1
2007	India+	Clinical samples	AACf1	1
2007	India+	Clinical samples	ANTd	2
2007	India+	Clinical samples	APHf	2
2007	India+	Freshwater	AACf1	1
2007	India+	Freshwater	ANTa	1
2007	India+	Human samples	AACf1	1
2007	India+	Soil	AACf1	1
2007	India+	Soil	AACj	1
2007	Indonesia+	Human samples	AACf1	4
2007	Japan	Agrosystems	AACf1	1
2007	Korea	Clinical samples	APHf	1
2007	Mexico	Clinical samples	AACg	1
2007	Middle East	Clinical samples	AACf1	1
2007	Middle East	Human samples	AACf1	1
2007	Northern Africa	Human samples	AACf1	1
2007	Oceania	Clinical samples	AACc	12
2007	Oceania	Clinical samples	AACe1	5
2007	Oceania	Clinical samples	AACf1	2
2007	Oceania	Clinical samples	AACg	1
2007	Oceania	Clinical samples	ANTb	1
2007	Oceania	Clinical samples	APHf	6
2007	Oceania	Farms, cattles	AACf1	2
2007	Oceania	Farms, cattles	AACh	1
2007	Oceania	Human samples	AACe1	1
2007	Oceania	Human samples	AACf1	6
2007	Oceania	Human samples	APHf	1
2007	Rest Central America	Clinical samples	AACc	4
2007	Rest South America	Clinical samples	AACg	8
2007	Rest South America	Clinical samples	ANTa	12
2007	Rest South America	Human samples	AACc	3
2007	Southeastern Asia	Clinical samples	AACc	1
2007	Southeastern Asia	Clinical samples	AACf1	38
2007	Southeastern Asia	Clinical samples	ANTa	2
2007	Southeastern Asia	Farms, cattles	ANTa	3
2007	Southeastern Asia	Human samples	AACf1	2
2007	Southeastern Asia	Soil	AACf1	3
2007	Southern Africa	Human samples	AACf1	6
2007	Turkey	Clinical samples	AACg	14
2007	USA	Agrosystems	AACf1	23
2007	USA	Clinical samples	AACa	13
2007	USA	Clinical samples	AACb	1
2007	USA	Clinical samples	AACc	7
2007	USA	Clinical samples	AACd	2
2007	USA	Clinical samples	AACe1	31
2007	USA	Clinical samples	AACf1	3
2007	USA	Clinical samples	AACg	11
2007	USA	Clinical samples	AACh	20
2007	USA	Clinical samples	AACj	45
2007	USA	Clinical samples	ANTa	2
2007	USA	Clinical samples	ANTb	26
2007	USA	Clinical samples	ANTd	14
2007	USA	Clinical samples	APHf	2
2007	USA	Domestic animals	AACh	1
2007	USA	Farms, cattles	AACb	1
2007	USA	Farms, cattles	AACe1	2
2007	USA	Farms, cattles	AACf1	10
2007	USA	Farms, cattles	AACh	2
2007	USA	Farms, cattles	AACi	1
2007	USA	Farms, cattles	ANTa	1
2007	USA	Farms, cattles	ANTb	1
2007	USA	Farms, cattles	APHa	1
2007	USA	Farms, cattles	APHf	2
2007	USA	Human habitat	AACf1	2
2007	USA	Human habitat	ANTa	2
2007	USA	Human habitat	APHf	1
2007	USA	Human samples	AACb	1
2007	USA	Human samples	AACe1	3
2007	USA	Human samples	AACf1	7
2007	USA	Human samples	AACg	1
2007	USA	Human samples	AACh	2
2007	USA	Human samples	AACi	1
2007	USA	Human samples	AACj	4
2007	USA	Human samples	ANTb	2
2007	Western Africa	Farms, cattles	AACa	1
2007	Western Africa	Farms, cattles	AACf1	1
2007	Western Africa	Human samples	AACf1	6
2007	Western Europe	Clinical samples	AACc	26
2007	Western Europe	Clinical samples	AACd	2
2007	Western Europe	Clinical samples	AACe1	26
2007	Western Europe	Clinical samples	AACf1	9
2007	Western Europe	Clinical samples	AACg	3
2007	Western Europe	Clinical samples	AACh	16
2007	Western Europe	Clinical samples	AACj	3
2007	Western Europe	Clinical samples	ANTa	10
2007	Western Europe	Clinical samples	ANTb	4
2007	Western Europe	Clinical samples	ANTd	3
2007	Western Europe	Clinical samples	APHc	1
2007	Western Europe	Clinical samples	APHd1	15
2007	Western Europe	Clinical samples	APHf	1
2007	Western Europe	Farms, cattles	AACf1	5
2007	Western Europe	Farms, cattles	ANTa	6
2007	Western Europe	Human samples	AACd	1
2007	Western Europe	Human samples	AACe1	1
2007	Western Europe	Human samples	AACf1	2
2007	Western Europe	Human samples	AACg	1
2007	Western Europe	Human samples	ANTa	1
2007	Western Europe	Human samples	ANTb	1
2007	Western Europe	Soil	AACf1	1
2008	Brazil	Clinical samples	AACe1	3
2008	Brazil	Clinical samples	APHf	1
2008	Brazil	Farms, cattles	AACd	1
2008	Brazil	Human habitat	AACf1	1
2008	Brazil	Human samples	AACe1	1
2008	Canada	Clinical samples	APHf	3
2008	Canada	Human habitat	AACf1	1
2008	Canada	Human samples	AACf1	3
2008	Central Europe	Clinical samples	AACe1	1
2008	Central Europe	Clinical samples	AACf1	1
2008	Central Europe	Clinical samples	APHf	1
2008	Central Europe	Soil	ANTa	1
2008	China+	Clinical samples	AACc	1
2008	China+	Clinical samples	AACg	1
2008	China+	Farms, cattles	AACe1	1
2008	China+	Farms, cattles	AACf1	1
2008	China+	Farms, cattles	AACg	3
2008	China+	Farms, cattles	AACi	1
2008	China+	Farms, cattles	APHa	1
2008	China+	Freshwater	AACf1	1
2008	China+	Human samples	AACf1	1
2008	China+	Soil	AACc	1
2008	China+	Soil	ANTa	1
2008	Eastern Africa	Human samples	AACf1	25
2008	India+	Clinical samples	AACf1	1
2008	India+	Clinical samples	AACg	1
2008	India+	Clinical samples	AACh	1
2008	India+	Clinical samples	ANTd	1
2008	India+	Clinical samples	APHf	3
2008	India+	Human samples	AACf1	1
2008	India+	Sludge, waste	AACg	1
2008	Indonesia+	Human samples	AACf1	8
2008	Japan	Freshwater	AACj	1
2008	Japan	Soil	APHf	1
2008	Korea	Clinical samples	AACe1	1
2008	Korea	Clinical samples	APHf	1
2008	Mexico	Clinical samples	AACg	2
2008	Mexico	Clinical samples	ANTb	1
2008	Middle East	Clinical samples	AACf1	2
2008	Middle East	Human habitat	AACf1	1
2008	Middle East	Human samples	AACf1	2
2008	Oceania	Clinical samples	AACa	1
2008	Oceania	Clinical samples	AACc	12
2008	Oceania	Clinical samples	AACf1	3
2008	Oceania	Clinical samples	AACg	3
2008	Oceania	Clinical samples	AACj	1
2008	Oceania	Clinical samples	ANTd	1
2008	Oceania	Human samples	AACf1	31
2008	Rest Central America	Clinical samples	AACc	4
2008	Rest South America	Clinical samples	AACg	1
2008	Rest South America	Clinical samples	ANTa	2
2008	Rest South America	Human samples	AACc	9
2008	Russia+	Clinical samples	AACc	1
2008	Southeastern Asia	Clinical samples	AACf1	10
2008	Southeastern Asia	Clinical samples	ANTa	8
2008	Southeastern Asia	Human samples	AACf1	13
2008	Southeastern Asia	Human samples	AACi	1
2008	Southeastern Asia	Soil	AACf1	1
2008	Southern Africa	Clinical samples	AACc	15
2008	Southern Africa	Clinical samples	AACg	5
2008	Southern Africa	Clinical samples	ANTa	4
2008	Southern Africa	Freshwater	AACm	1
2008	Southern Africa	Human samples	AACf1	9
2008	Turkey	Clinical samples	AACg	4
2008	Turkey	Clinical samples	ANTb	1
2008	USA	Clinical samples	AACa	10
2008	USA	Clinical samples	AACc	5
2008	USA	Clinical samples	AACe1	29
2008	USA	Clinical samples	AACf1	19
2008	USA	Clinical samples	AACg	6
2008	USA	Clinical samples	AACh	16
2008	USA	Clinical samples	AACi	1
2008	USA	Clinical samples	AACj	47
2008	USA	Clinical samples	ANTa	4
2008	USA	Clinical samples	ANTd	4
2008	USA	Clinical samples	APHa	1
2008	USA	Clinical samples	APHf	1
2008	USA	Farms, cattles	AACf1	17
2008	USA	Farms, cattles	AACh	5
2008	USA	Farms, cattles	ANTd	3
2008	USA	Human habitat	APHd1	1
2008	USA	Human samples	AACc	2
2008	USA	Human samples	AACe1	1
2008	USA	Human samples	AACf1	6
2008	USA	Human samples	AACg	1
2008	USA	Human samples	AACj	1
2008	USA	Human samples	ANTb	14
2008	USA	Human samples	ANTe	2
2008	Western Africa	Human samples	AACf1	2
2008	Western Europe	Agrosystems	AACf1	3
2008	Western Europe	Clinical samples	AACa	8
2008	Western Europe	Clinical samples	AACc	50
2008	Western Europe	Clinical samples	AACd	2
2008	Western Europe	Clinical samples	AACe1	19
2008	Western Europe	Clinical samples	AACf1	11
2008	Western Europe	Clinical samples	AACg	2
2008	Western Europe	Clinical samples	AACh	9
2008	Western Europe	Clinical samples	AACi	1
2008	Western Europe	Clinical samples	AACj	7
2008	Western Europe	Clinical samples	ANTa	9
2008	Western Europe	Clinical samples	ANTb	3
2008	Western Europe	Clinical samples	ANTd	3
2008	Western Europe	Clinical samples	APHa	1
2008	Western Europe	Clinical samples	APHc	1
2008	Western Europe	Clinical samples	APHd1	5
2008	Western Europe	Clinical samples	APHf	6
2008	Western Europe	Domestic animals	AACg	2
2008	Western Europe	Domestic animals	ANTa	2
2008	Western Europe	Farms, cattles	AACf1	11
2008	Western Europe	Farms, cattles	AACg	1
2008	Western Europe	Farms, cattles	ANTa	5
2008	Western Europe	Farms, cattles	ANTb	1
2008	Western Europe	Human samples	AACc	1
2008	Western Europe	Human samples	AACf1	5
2008	Western Europe	Human samples	AACg	28
2008	Western Europe	Human samples	AACj	1
2008	Western Europe	Human samples	ANTa	45
2008	Western Europe	Human samples	ANTb	19
2008	Western Europe	Human samples	APHf	1
2008	Western Europe	Sludge, waste	AACf1	1
2009	Brazil	Agrosystems	AACg	2
2009	Brazil	Clinical samples	ANTb	7
2009	Brazil	Clinical samples	APHd2	2
2009	Canada	Clinical samples	APHf	3
2009	Canada	Farms, cattles	AACd	5
2009	Canada	Farms, cattles	AACf1	1
2009	Canada	Farms, cattles	ANTa	1
2009	Canada	Human habitat	AACf1	7
2009	Canada	Human samples	AACf1	2
2009	Central Europe	Clinical samples	AACe1	2
2009	Central Europe	Clinical samples	AACf1	1
2009	Central Europe	Clinical samples	APHf	1
2009	China+	Clinical samples	AACa	2
2009	China+	Clinical samples	AACc	4
2009	China+	Clinical samples	AACe1	3
2009	China+	Clinical samples	AACf1	1
2009	China+	Clinical samples	AACh	1
2009	China+	Clinical samples	AACj	4
2009	China+	Farms, cattles	AACg	4
2009	China+	Farms, cattles	ANTa	3
2009	China+	Farms, cattles	ANTb	3
2009	China+	Flora, fauna	AACg	1
2009	China+	Human habitat	ANTa	1
2009	China+	Human habitat	APHd1	1
2009	China+	Sludge, waste	AACh	1
2009	Eastern Africa	Clinical samples	AACf1	1
2009	Eastern Africa	Farms, cattles	AACf1	1
2009	Eastern Africa	Human samples	AACc	2
2009	Eastern Africa	Human samples	AACf1	4
2009	India+	Agrosystems	AACf1	1
2009	India+	Clinical samples	AACc	1
2009	India+	Clinical samples	AACe1	11
2009	India+	Clinical samples	AACh	9
2009	India+	Clinical samples	APHf	2
2009	India+	Freshwater	AACf1	1
2009	Indonesia+	Human samples	AACf1	15
2009	Japan	Clinical samples	AACd	2
2009	Japan	Clinical samples	AACe1	3
2009	Korea	Clinical samples	AACf1	1
2009	Korea	Clinical samples	AACg	1
2009	Korea	Clinical samples	ANTa	1
2009	Korea	Clinical samples	ANTb	1
2009	Korea	Domestic animals	AACg	1
2009	Korea	Domestic animals	ANTa	1
2009	Middle East	Clinical samples	ANTa	1
2009	Middle East	Human samples	AACf1	5
2009	Northern Africa	Soil	ANTa	1
2009	Northern Africa	Soil	ANTb	1
2009	Oceania	Clinical samples	AACc	11
2009	Oceania	Clinical samples	AACf1	1
2009	Oceania	Clinical samples	AACj	1
2009	Oceania	Clinical samples	ANTb	2
2009	Oceania	Farms, cattles	AACi	1
2009	Oceania	Farms, cattles	APHa	1
2009	Oceania	Human samples	AACf1	7
2009	Rest Central America	Clinical samples	AACc	7
2009	Rest Central America	Clinical samples	AACe1	1
2009	Rest Central America	Clinical samples	AACj	1
2009	Rest South America	Clinical samples	AACc	2
2009	Rest South America	Clinical samples	AACg	1
2009	Rest South America	Clinical samples	AACh	1
2009	Rest South America	Farms, cattles	AACf1	1
2009	Rest South America	Human samples	AACc	116
2009	Rest South America	Human samples	AACf1	10
2009	Rest South America	Soil	AACf1	1
2009	Rest South America	Soil	APHb	1
2009	Rest South America	Soil	APHf	1
2009	Russia+	Clinical samples	AACg	1
2009	Russia+	Clinical samples	ANTb	1
2009	Southeastern Asia	Clinical samples	AACa	2
2009	Southeastern Asia	Clinical samples	AACf1	8
2009	Southeastern Asia	Clinical samples	ANTa	9
2009	Southeastern Asia	Flora, fauna	AACf1	1
2009	Southeastern Asia	Human samples	AACf1	14
2009	Southern Africa	Clinical samples	AACc	2
2009	Southern Africa	Clinical samples	AACh	1
2009	Southern Africa	Clinical samples	APHf	2
2009	Southern Africa	Human samples	AACf1	10
2009	Southern Africa	Human samples	AACg	2
2009	Southern Africa	Soil	ANTa	1
2009	Turkey	Clinical samples	AACg	3
2009	USA	Agrosystems	AACf1	5
2009	USA	Clinical samples	AACa	1
2009	USA	Clinical samples	AACc	2
2009	USA	Clinical samples	AACd	2
2009	USA	Clinical samples	AACe1	23
2009	USA	Clinical samples	AACf1	13
2009	USA	Clinical samples	AACg	6
2009	USA	Clinical samples	AACh	21
2009	USA	Clinical samples	AACj	27
2009	USA	Clinical samples	ANTa	1
2009	USA	Clinical samples	ANTb	8
2009	USA	Clinical samples	ANTd	5
2009	USA	Clinical samples	APHd1	1
2009	USA	Clinical samples	APHf	1
2009	USA	Farms, cattles	AACb	6
2009	USA	Farms, cattles	AACf1	22
2009	USA	Farms, cattles	AACg	1
2009	USA	Farms, cattles	ANTa	2
2009	USA	Farms, cattles	ANTd	1
2009	USA	Farms, cattles	APHf	3
2009	USA	Farms, cattles	APHh	1
2009	USA	Freshwater	AACf1	3
2009	USA	Human samples	AACb	1
2009	USA	Human samples	AACf1	6
2009	USA	Human samples	AACg	8
2009	USA	Human samples	AACh	1
2009	USA	Human samples	ANTb	33
2009	USA	Human samples	ANTe	5
2009	USA	Human samples	APHf	1
2009	USA	Soil	AACf1	1
2009	Western Africa	Agrosystems	AACf1	1
2009	Western Africa	Clinical samples	AACf1	15
2009	Western Africa	Farms, cattles	AACf1	6
2009	Western Africa	Human samples	AACf1	5
2009	Western Europe	Clinical samples	AACa	2
2009	Western Europe	Clinical samples	AACb	3
2009	Western Europe	Clinical samples	AACc	53
2009	Western Europe	Clinical samples	AACe1	8
2009	Western Europe	Clinical samples	AACf1	13
2009	Western Europe	Clinical samples	AACg	10
2009	Western Europe	Clinical samples	AACh	3
2009	Western Europe	Clinical samples	AACi	1
2009	Western Europe	Clinical samples	ANTa	10
2009	Western Europe	Clinical samples	ANTb	6
2009	Western Europe	Clinical samples	ANTc	1
2009	Western Europe	Clinical samples	ANTd	2
2009	Western Europe	Clinical samples	APHa	1
2009	Western Europe	Clinical samples	APHd1	7
2009	Western Europe	Clinical samples	APHf	1
2009	Western Europe	Farms, cattles	AACe1	1
2009	Western Europe	Farms, cattles	AACf1	4
2009	Western Europe	Farms, cattles	AACf2	2
2009	Western Europe	Farms, cattles	AACg	3
2009	Western Europe	Farms, cattles	AACh	3
2009	Western Europe	Farms, cattles	ANTa	3
2009	Western Europe	Farms, cattles	ANTb	2
2009	Western Europe	Farms, cattles	ANTd	3
2009	Western Europe	Flora, fauna	AACe1	1
2009	Western Europe	Flora, fauna	AACh	1
2009	Western Europe	Human samples	AACe1	1
2009	Western Europe	Human samples	AACf1	9
2009	Western Europe	Human samples	AACg	44
2009	Western Europe	Human samples	ANTa	54
2009	Western Europe	Human samples	ANTb	28
2009	Western Europe	Sludge, waste	AACf1	5
2010	Brazil	Agrosystems	AACg	1
2010	Brazil	Clinical samples	AACe1	2
2010	Brazil	Clinical samples	AACf1	1
2010	Brazil	Clinical samples	AACj	1
2010	Brazil	Farms, cattles	AACf1	9
2010	Brazil	Flora, fauna	APHb	1
2010	Brazil	Soil	APHb	1
2010	Canada	Clinical samples	AACj	2
2010	Canada	Clinical samples	APHf	5
2010	Canada	Farms, cattles	AACf1	1
2010	Canada	Human habitat	AACf1	2
2010	Canada	Human samples	AACf1	1
2010	Central Europe	Clinical samples	AACe1	2
2010	Central Europe	Clinical samples	AACf1	1
2010	Central Europe	Clinical samples	AACh	1
2010	Central Europe	Clinical samples	AACj	1
2010	Central Europe	Flora, fauna	AACe1	2
2010	Central Europe	Flora, fauna	AACh	2
2010	China+	Agrosystems	AACb	1
2010	China+	Agrosystems	ANTa	1
2010	China+	Agrosystems	ANTb	1
2010	China+	Clinical samples	AACa	1
2010	China+	Clinical samples	AACc	2
2010	China+	Clinical samples	AACe1	9
2010	China+	Clinical samples	AACf1	3
2010	China+	Clinical samples	AACh	1
2010	China+	Clinical samples	AACj	4
2010	China+	Clinical samples	ANTb	1
2010	China+	Clinical samples	ANTd	2
2010	China+	Clinical samples	APHd2	1
2010	China+	Clinical samples	APHf	2
2010	China+	Farms, cattles	AACe1	1
2010	China+	Farms, cattles	AACf1	2
2010	China+	Farms, cattles	AACi	1
2010	China+	Farms, cattles	APHa	1
2010	China+	Freshwater	AACg	1
2010	China+	Human samples	AACf1	1
2010	China+	Human samples	AACh	1
2010	China+	Soil	AACm	2
2010	China+	Soil	ANTa	2
2010	Eastern Africa	Human samples	AACc	8
2010	India+	Clinical samples	AACe1	2
2010	India+	Clinical samples	AACg	1
2010	India+	Clinical samples	AACh	1
2010	India+	Freshwater	ANTa	1
2010	India+	Human samples	AACf1	6
2010	Indonesia+	Human samples	AACf1	23
2010	Japan	Clinical samples	AACe1	2
2010	Japan	Clinical samples	AACf1	1
2010	Japan	Clinical samples	APHf	3
2010	Japan	Freshwater	ANTa	5
2010	Japan	Soil	APHb	1
2010	Korea	Clinical samples	APHf	3
2010	Korea	Farms, cattles	AACg	1
2010	Korea	Farms, cattles	ANTa	1
2010	Korea	Human samples	AACe1	1
2010	Korea	Human samples	AACj	1
2010	Korea	Sludge, waste	AACh	3
2010	Mexico	Agrosystems	AACf1	1
2010	Mexico	Clinical samples	AACg	1
2010	Middle East	Human samples	AACf1	2
2010	Middle East	Human samples	AACh	3
2010	Oceania	Clinical samples	AACc	23
2010	Oceania	Clinical samples	AACf1	8
2010	Oceania	Farms, cattles	AACf1	2
2010	Oceania	Human samples	AACf1	11
2010	Oceania	Human samples	AACj	1
2010	Oceania	Soil	AACc	2
2010	Oceania	Soil	AACf1	3
2010	Oceania	Soil	APHf	1
2010	Rest Central America	Clinical samples	AACc	2
2010	Rest Central America	Soil	AACc	2
2010	Rest Central America	Soil	APHb	3
2010	Rest South America	Agrosystems	AACb	2
2010	Rest South America	Agrosystems	APHb	1
2010	Rest South America	Clinical samples	AACe1	3
2010	Rest South America	Clinical samples	AACh	2
2010	Rest South America	Flora, fauna	AACf1	3
2010	Rest South America	Human samples	AACc	15
2010	Rest South America	Human samples	AACf1	2
2010	Rest South America	Soil	AACc	1
2010	Rest South America	Soil	APHb	1
2010	Russia+	Clinical samples	AACc	1
2010	Russia+	Clinical samples	ANTa	1
2010	Southeastern Asia	Clinical samples	AACc	3
2010	Southeastern Asia	Clinical samples	AACf1	22
2010	Southeastern Asia	Clinical samples	AACh	1
2010	Southeastern Asia	Clinical samples	ANTa	6
2010	Southeastern Asia	Human samples	AACa	1
2010	Southeastern Asia	Human samples	AACd	2
2010	Southeastern Asia	Human samples	AACf1	22
2010	Southeastern Asia	Human samples	AACj	7
2010	Southeastern Asia	Human samples	ANTd	1
2010	Southern Africa	Clinical samples	AACc	21
2010	Southern Africa	Human habitat	APHb	1
2010	Southern Africa	Human samples	AACf1	21
2010	Turkey	Clinical samples	AACg	1
2010	Turkey	Clinical samples	ANTa	2
2010	USA	Agrosystems	AACc	1
2010	USA	Agrosystems	AACf1	12
2010	USA	Agrosystems	APHb	1
2010	USA	Clinical samples	AACa	4
2010	USA	Clinical samples	AACb	5
2010	USA	Clinical samples	AACc	2
2010	USA	Clinical samples	AACe1	29
2010	USA	Clinical samples	AACf1	26
2010	USA	Clinical samples	AACg	3
2010	USA	Clinical samples	AACh	27
2010	USA	Clinical samples	AACi	1
2010	USA	Clinical samples	AACj	15
2010	USA	Clinical samples	ANTa	1
2010	USA	Clinical samples	ANTb	8
2010	USA	Clinical samples	ANTd	6
2010	USA	Clinical samples	APHa	1
2010	USA	Farms, cattles	AACb	16
2010	USA	Farms, cattles	AACf1	73
2010	USA	Farms, cattles	AACg	13
2010	USA	Farms, cattles	AACh	2
2010	USA	Farms, cattles	ANTa	3
2010	USA	Farms, cattles	ANTb	52
2010	USA	Farms, cattles	ANTd	1
2010	USA	Farms, cattles	ANTe	4
2010	USA	Farms, cattles	APHf	1
2010	USA	Flora, fauna	AACf1	2
2010	USA	Freshwater	AACf1	6
2010	USA	Human habitat	AACg	1
2010	USA	Human habitat	ANTa	1
2010	USA	Human samples	AACb	1
2010	USA	Human samples	AACe1	3
2010	USA	Human samples	AACf1	12
2010	USA	Human samples	AACg	2
2010	USA	Human samples	AACh	3
2010	USA	Human samples	ANTb	16
2010	USA	Soil	AACc	6
2010	USA	Soil	AACf1	8
2010	USA	Soil	ANTa	1
2010	USA	Soil	APHb	7
2010	USA	Soil	APHf	1
2010	Western Africa	Clinical samples	AACf1	16
2010	Western Africa	Farms, cattles	AACf1	2
2010	Western Europe	Clinical samples	AACa	4
2010	Western Europe	Clinical samples	AACb	1
2010	Western Europe	Clinical samples	AACc	59
2010	Western Europe	Clinical samples	AACd	1
2010	Western Europe	Clinical samples	AACe1	23
2010	Western Europe	Clinical samples	AACe2	1
2010	Western Europe	Clinical samples	AACf1	15
2010	Western Europe	Clinical samples	AACg	4
2010	Western Europe	Clinical samples	AACh	11
2010	Western Europe	Clinical samples	AACj	1
2010	Western Europe	Clinical samples	ANTa	13
2010	Western Europe	Clinical samples	ANTb	6
2010	Western Europe	Clinical samples	ANTd	4
2010	Western Europe	Clinical samples	APHd1	5
2010	Western Europe	Clinical samples	APHf	4
2010	Western Europe	Farms, cattles	AACf1	11
2010	Western Europe	Farms, cattles	AACg	7
2010	Western Europe	Farms, cattles	ANTa	6
2010	Western Europe	Farms, cattles	ANTb	3
2010	Western Europe	Human samples	AACd	1
2010	Western Europe	Human samples	AACe1	1
2010	Western Europe	Human samples	AACf1	2
2010	Western Europe	Human samples	ANTa	1
2010	Western Europe	Soil	AACb	1
2010	Western Europe	Soil	AACc	1
2011	Brazil	Clinical samples	AACe1	1
2011	Brazil	Clinical samples	AACg	5
2011	Brazil	Clinical samples	AACj	3
2011	Brazil	Clinical samples	ANTa	6
2011	Brazil	Farms, cattles	AACf1	1
2011	Brazil	Farms, cattles	AACh	1
2011	Canada	Clinical samples	APHf	1
2011	Central Europe	Clinical samples	AACa	1
2011	Central Europe	Clinical samples	AACf1	1
2011	Central Europe	Clinical samples	AACj	2
2011	Central Europe	Freshwater	AACb	3
2011	Central Europe	Human samples	APHd2	1
2011	China+	Agrosystems	AACf1	2
2011	China+	Agrosystems	AACg	1
2011	China+	Clinical samples	AACa	1
2011	China+	Clinical samples	AACc	1
2011	China+	Clinical samples	AACe1	14
2011	China+	Clinical samples	AACf1	1
2011	China+	Clinical samples	AACg	5
2011	China+	Clinical samples	AACh	3
2011	China+	Clinical samples	AACj	14
2011	China+	Clinical samples	ANTa	2
2011	China+	Clinical samples	ANTb	1
2011	China+	Farms, cattles	AACg	3
2011	China+	Farms, cattles	ANTa	4
2011	China+	Flora, fauna	ANTa	1
2011	China+	Flora, fauna	ANTb	1
2011	China+	Freshwater	AACa	1
2011	China+	Freshwater	AACf1	1
2011	China+	Freshwater	ANTa	1
2011	China+	Human habitat	AACd	2
2011	China+	Human samples	AACf1	4
2011	China+	Human samples	ANTd	1
2011	China+	Sludge, waste	AACa	1
2011	China+	Soil	AACf1	3
2011	China+	Soil	AACg	4
2011	China+	Soil	ANTa	3
2011	China+	Soil	ANTb	1
2011	China+	Soil	APHh	3
2011	Eastern Africa	Human samples	AACc	1
2011	Eastern Africa	Human samples	AACe1	1
2011	Eastern Africa	Human samples	AACf1	1
2011	Eastern Africa	Human samples	AACh	1
2011	India+	Clinical samples	AACc	1
2011	India+	Clinical samples	AACf1	29
2011	India+	Freshwater	ANTa	1
2011	India+	Human samples	AACf1	17
2011	India+	Soil	AACc	2
2011	India+	Soil	APHb	1
2011	Indonesia+	Human samples	AACf1	13
2011	Japan	Clinical samples	AACd	1
2011	Japan	Freshwater	APHf	1
2011	Korea	Agrosystems	AACf1	1
2011	Korea	Clinical samples	AACg	1
2011	Korea	Farms, cattles	AACg	4
2011	Korea	Farms, cattles	ANTa	4
2011	Mexico	Clinical samples	AACf1	1
2011	Mexico	Clinical samples	AACg	4
2011	Mexico	Clinical samples	AACh	1
2011	Mexico	Clinical samples	ANTb	1
2011	Mexico	Freshwater	APHf	3
2011	Middle East	Clinical samples	AACf1	1
2011	Middle East	Farms, cattles	AACf1	2
2011	Middle East	Human samples	AACf1	3
2011	Middle East	Soil	ANTa	1
2011	Middle East	Soil	ANTb	1
2011	Northern Africa	Clinical samples	AACe1	1
2011	Northern Africa	Soil	APHb	1
2011	Oceania	Clinical samples	AACc	25
2011	Oceania	Clinical samples	AACf1	9
2011	Oceania	Clinical samples	APHf	3
2011	Oceania	Human samples	AACf1	39
2011	Oceania	Soil	AACf1	4
2011	Rest Central America	Clinical samples	AACc	1
2011	Rest South America	Clinical samples	AACg	5
2011	Rest South America	Clinical samples	AACh	3
2011	Rest South America	Clinical samples	ANTa	5
2011	Rest South America	Farms, cattles	AACd	2
2011	Rest South America	Farms, cattles	AACf1	1
2011	Rest South America	Flora, fauna	AACf1	2
2011	Rest South America	Human samples	AACc	70
2011	Rest South America	Human samples	AACe1	2
2011	Russia+	Clinical samples	AACg	3
2011	Southeastern Asia	Clinical samples	AACd	3
2011	Southeastern Asia	Clinical samples	AACe1	3
2011	Southeastern Asia	Clinical samples	AACf1	40
2011	Southeastern Asia	Clinical samples	AACh	1
2011	Southeastern Asia	Clinical samples	AACj	1
2011	Southeastern Asia	Clinical samples	ANTa	2
2011	Southeastern Asia	Clinical samples	ANTd	1
2011	Southeastern Asia	Freshwater	AACg	2
2011	Southeastern Asia	Freshwater	ANTa	5
2011	Southeastern Asia	Freshwater	ANTb	3
2011	Southeastern Asia	Human samples	AACf1	3
2011	Southeastern Asia	Human samples	ANTa	1
2011	Southern Africa	Clinical samples	AACc	9
2011	Southern Africa	Farms, cattles	AACc	1
2011	Southern Africa	Human samples	AACf1	42
2011	Ukraine+	Clinical samples	AACc	7
2011	USA	Agrosystems	AACf1	26
2011	USA	Clinical samples	AACa	1
2011	USA	Clinical samples	AACb	7
2011	USA	Clinical samples	AACc	2
2011	USA	Clinical samples	AACe1	15
2011	USA	Clinical samples	AACf1	60
2011	USA	Clinical samples	AACg	10
2011	USA	Clinical samples	AACh	30
2011	USA	Clinical samples	AACi	2
2011	USA	Clinical samples	AACj	22
2011	USA	Clinical samples	ANTa	2
2011	USA	Clinical samples	ANTb	51
2011	USA	Clinical samples	ANTd	14
2011	USA	Clinical samples	APHa	2
2011	USA	Clinical samples	APHd1	2
2011	USA	Clinical samples	APHf	2
2011	USA	Farms, cattles	AACb	16
2011	USA	Farms, cattles	AACe1	2
2011	USA	Farms, cattles	AACf1	146
2011	USA	Farms, cattles	AACg	2
2011	USA	Farms, cattles	AACh	13
2011	USA	Farms, cattles	AACi	2
2011	USA	Farms, cattles	ANTa	2
2011	USA	Farms, cattles	ANTd	3
2011	USA	Farms, cattles	APHa	2
2011	USA	Farms, cattles	APHf	5
2011	USA	Freshwater	AACf1	9
2011	USA	Human habitat	AACf1	1
2011	USA	Human habitat	ANTd	1
2011	USA	Human samples	AACc	2
2011	USA	Human samples	AACe1	1
2011	USA	Human samples	AACf1	9
2011	USA	Human samples	AACh	1
2011	USA	Human samples	ANTb	1
2011	USA	Soil	AACf1	3
2011	USA	Soil	AACg	1
2011	Western Africa	Clinical samples	AACf1	5
2011	Western Europe	Clinical samples	AACa	7
2011	Western Europe	Clinical samples	AACb	1
2011	Western Europe	Clinical samples	AACc	144
2011	Western Europe	Clinical samples	AACd	6
2011	Western Europe	Clinical samples	AACe1	9
2011	Western Europe	Clinical samples	AACf1	9
2011	Western Europe	Clinical samples	AACh	14
2011	Western Europe	Clinical samples	AACj	4
2011	Western Europe	Clinical samples	ANTa	9
2011	Western Europe	Clinical samples	ANTd	3
2011	Western Europe	Clinical samples	APHd1	10
2011	Western Europe	Clinical samples	APHf	8
2011	Western Europe	Domestic animals	ANTa	1
2011	Western Europe	Farms, cattles	AACd	3
2011	Western Europe	Farms, cattles	AACf1	6
2011	Western Europe	Farms, cattles	AACg	3
2011	Western Europe	Farms, cattles	ANTa	9
2011	Western Europe	Farms, cattles	ANTb	3
2011	Western Europe	Flora, fauna	AACe1	1
2011	Western Europe	Flora, fauna	AACh	1
2011	Western Europe	Human samples	AACf1	13
2011	Western Europe	Human samples	AACg	22
2011	Western Europe	Human samples	ANTa	10
2011	Western Europe	Human samples	ANTb	10
2011	Western Europe	Human samples	ANTd	2
2011	Western Europe	Sludge, waste	APHd1	1
2012	Brazil	Agrosystems	AACf1	1
2012	Brazil	Clinical samples	AACe1	5
2012	Brazil	Clinical samples	AACf1	1
2012	Brazil	Clinical samples	AACg	4
2012	Brazil	Clinical samples	AACh	1
2012	Brazil	Clinical samples	ANTa	3
2012	Brazil	Clinical samples	ANTb	4
2012	Brazil	Clinical samples	ANTd	1
2012	Brazil	Clinical samples	APHf	1
2012	Brazil	Farms, cattles	AACf1	3
2012	Canada	Human samples	AACf1	1
2012	Central Europe	Clinical samples	AACb	4
2012	Central Europe	Clinical samples	AACe1	118
2012	Central Europe	Clinical samples	AACh	71
2012	Central Europe	Clinical samples	ANTd	7
2012	Central Europe	Clinical samples	APHf	2
2012	China+	Agrosystems	AACb	1
2012	China+	Agrosystems	AACf1	1
2012	China+	Agrosystems	ANTa	2
2012	China+	Agrosystems	APHg	1
2012	China+	Clinical samples	AACa	6
2012	China+	Clinical samples	AACc	2
2012	China+	Clinical samples	AACd	1
2012	China+	Clinical samples	AACe1	11
2012	China+	Clinical samples	AACg	2
2012	China+	Clinical samples	AACh	12
2012	China+	Clinical samples	AACi	1
2012	China+	Clinical samples	AACj	15
2012	China+	Clinical samples	ANTa	3
2012	China+	Clinical samples	ANTb	1
2012	China+	Clinical samples	APHa	1
2012	China+	Clinical samples	APHd1	1
2012	China+	Clinical samples	APHf	1
2012	China+	Farms, cattles	AACe1	6
2012	China+	Farms, cattles	AACg	1
2012	China+	Farms, cattles	AACh	18
2012	China+	Farms, cattles	AACi	3
2012	China+	Farms, cattles	ANTa	4
2012	China+	Farms, cattles	APHa	3
2012	China+	Freshwater	ANTa	1
2012	China+	Freshwater	APHd1	2
2012	China+	Human samples	AACa	1
2012	China+	Human samples	AACe1	3
2012	China+	Human samples	AACh	1
2012	China+	Human samples	AACj	7
2012	China+	Soil	AACf1	1
2012	China+	Soil	AACg	1
2012	China+	Soil	ANTa	4
2012	China+	Soil	ANTb	1
2012	India+	Clinical samples	AACb	1
2012	India+	Clinical samples	AACe1	74
2012	India+	Clinical samples	AACh	54
2012	India+	Clinical samples	AACm	1
2012	India+	Clinical samples	ANTc	1
2012	India+	Clinical samples	ANTd	8
2012	India+	Clinical samples	APHb	1
2012	India+	Farms, cattles	AACf1	1
2012	India+	Human samples	AACe1	1
2012	India+	Human samples	AACf1	18
2012	India+	Human samples	ANTb	1
2012	India+	Human samples	ANTd	1
2012	Indonesia+	Human samples	AACf1	2
2012	Japan	Farms, cattles	AACh	1
2012	Japan	Farms, cattles	AACi	1
2012	Japan	Farms, cattles	APHa	1
2012	Japan	Farms, cattles	APHf	1
2012	Japan	Human samples	AACd	1
2012	Japan	Human samples	AACe1	1
2012	Japan	Human samples	AACe2	2
2012	Japan	Human samples	AACf1	1
2012	Korea	Agrosystems	ANTa	1
2012	Korea	Clinical samples	APHf	1
2012	Korea	Farms, cattles	AACg	1
2012	Korea	Farms, cattles	ANTa	1
2012	Mexico	Clinical samples	AACg	2
2012	Mexico	Clinical samples	ANTb	6
2012	Mexico	Clinical samples	APHf	1
2012	Middle East	Clinical samples	AACe1	3
2012	Middle East	Clinical samples	AACh	1
2012	Middle East	Clinical samples	AACj	2
2012	Middle East	Clinical samples	APHf	1
2012	Middle East	Freshwater	AACg	1
2012	Middle East	Freshwater	ANTa	1
2012	Middle East	Human samples	AACj	2
2012	Northern Africa	Clinical samples	AACa	1
2012	Northern Africa	Clinical samples	AACe1	3
2012	Oceania	Clinical samples	AACc	20
2012	Oceania	Clinical samples	AACe1	2
2012	Oceania	Clinical samples	AACg	1
2012	Oceania	Clinical samples	AACh	1
2012	Oceania	Clinical samples	ANTb	1
2012	Oceania	Clinical samples	ANTc	1
2012	Oceania	Clinical samples	ANTd	1
2012	Oceania	Human samples	AACf1	79
2012	Rest Central America	Clinical samples	AACe1	1
2012	Rest Central America	Clinical samples	AACg	2
2012	Rest Central America	Clinical samples	AACh	2
2012	Rest Central America	Clinical samples	AACi	1
2012	Rest Central America	Clinical samples	AACj	1
2012	Rest Central America	Clinical samples	ANTb	1
2012	Rest Central America	Clinical samples	APHa	1
2012	Rest Central America	Human samples	AACh	1
2012	Rest South America	Clinical samples	AACa	3
2012	Rest South America	Clinical samples	AACe1	2
2012	Rest South America	Clinical samples	AACf1	1
2012	Rest South America	Clinical samples	AACg	7
2012	Rest South America	Clinical samples	AACh	4
2012	Rest South America	Clinical samples	AACj	1
2012	Rest South America	Clinical samples	ANTa	3
2012	Rest South America	Clinical samples	ANTb	3
2012	Rest South America	Clinical samples	ANTd	5
2012	Rest South America	Clinical samples	APHf	5
2012	Rest South America	Farms, cattles	AACb	3
2012	Rest South America	Farms, cattles	AACf1	6
2012	Rest South America	Flora, fauna	AACf1	21
2012	Rest South America	Human samples	AACc	20
2012	Rest South America	Human samples	AACe1	3
2012	Rest South America	Human samples	AACf1	5
2012	Rest South America	Human samples	AACh	2
2012	Rest South America	Human samples	ANTd	1
2012	Rest South America	Human samples	APHf	2
2012	Southeastern Asia	Clinical samples	AACc	1
2012	Southeastern Asia	Clinical samples	AACe1	8
2012	Southeastern Asia	Clinical samples	AACf1	63
2012	Southeastern Asia	Clinical samples	AACg	3
2012	Southeastern Asia	Clinical samples	AACh	1
2012	Southeastern Asia	Clinical samples	ANTb	1
2012	Southeastern Asia	Clinical samples	ANTd	2
2012	Southeastern Asia	Clinical samples	APHf	3
2012	Southeastern Asia	Flora, fauna	AACc	2
2012	Southeastern Asia	Human samples	AACe1	1
2012	Southeastern Asia	Human samples	AACf1	5
2012	Southeastern Asia	Human samples	ANTd	1
2012	Southeastern Asia	Human samples	APHf	1
2012	Southeastern Asia	Soil	AACf1	1
2012	Southern Africa	Clinical samples	AACc	2
2012	Southern Africa	Clinical samples	AACe1	1
2012	Southern Africa	Human samples	AACa	1
2012	Southern Africa	Human samples	AACf1	29
2012	Southern Africa	Human samples	APHf	1
2012	Ukraine+	Clinical samples	AACc	11
2012	USA	Agrosystems	AACf1	12
2012	USA	Clinical samples	AACa	12
2012	USA	Clinical samples	AACb	29
2012	USA	Clinical samples	AACc	3
2012	USA	Clinical samples	AACd	1
2012	USA	Clinical samples	AACe1	44
2012	USA	Clinical samples	AACf1	90
2012	USA	Clinical samples	AACg	17
2012	USA	Clinical samples	AACh	22
2012	USA	Clinical samples	AACi	8
2012	USA	Clinical samples	AACj	14
2012	USA	Clinical samples	ANTa	2
2012	USA	Clinical samples	ANTb	75
2012	USA	Clinical samples	ANTd	8
2012	USA	Clinical samples	ANTe	1
2012	USA	Clinical samples	APHa	7
2012	USA	Clinical samples	APHf	9
2012	USA	Farms, cattles	AACa	2
2012	USA	Farms, cattles	AACb	18
2012	USA	Farms, cattles	AACe1	1
2012	USA	Farms, cattles	AACf1	82
2012	USA	Farms, cattles	AACg	5
2012	USA	Farms, cattles	AACh	4
2012	USA	Farms, cattles	AACi	2
2012	USA	Farms, cattles	ANTa	6
2012	USA	Farms, cattles	ANTd	4
2012	USA	Farms, cattles	APHa	2
2012	USA	Freshwater	AACb	1
2012	USA	Freshwater	AACf1	52
2012	USA	Freshwater	ANTa	2
2012	USA	Freshwater	APHf	1
2012	USA	Human samples	AACa	2
2012	USA	Human samples	AACb	1
2012	USA	Human samples	AACc	4
2012	USA	Human samples	AACe1	3
2012	USA	Human samples	AACf1	21
2012	USA	Human samples	AACg	16
2012	USA	Human samples	AACj	2
2012	USA	Human samples	ANTa	1
2012	USA	Human samples	ANTb	38
2012	USA	Human samples	ANTd	2
2012	USA	Human samples	APHd1	1
2012	USA	Human samples	APHf	1
2012	USA	Soil	AACf1	11
2012	USA	Soil	AACg	1
2012	Western Africa	Clinical samples	AACf1	6
2012	Western Europe	Agrosystems	AACc	1
2012	Western Europe	Agrosystems	AACe1	2
2012	Western Europe	Agrosystems	AACf1	6
2012	Western Europe	Agrosystems	AACg	2
2012	Western Europe	Agrosystems	AACh	4
2012	Western Europe	Agrosystems	ANTa	1
2012	Western Europe	Agrosystems	APHb	1
2012	Western Europe	Agrosystems	APHf	5
2012	Western Europe	Clinical samples	AACa	2
2012	Western Europe	Clinical samples	AACc	127
2012	Western Europe	Clinical samples	AACd	1
2012	Western Europe	Clinical samples	AACe1	55
2012	Western Europe	Clinical samples	AACf1	3
2012	Western Europe	Clinical samples	AACg	3
2012	Western Europe	Clinical samples	AACh	53
2012	Western Europe	Clinical samples	AACi	1
2012	Western Europe	Clinical samples	ANTa	14
2012	Western Europe	Clinical samples	ANTd	5
2012	Western Europe	Clinical samples	ANTe	1
2012	Western Europe	Clinical samples	APHa	1
2012	Western Europe	Clinical samples	APHd1	18
2012	Western Europe	Clinical samples	APHf	8
2012	Western Europe	Farms, cattles	AACg	2
2012	Western Europe	Farms, cattles	ANTa	8
2012	Western Europe	Farms, cattles	APHf	2
2012	Western Europe	Freshwater	AACc	2
2012	Western Europe	Freshwater	AACf1	1
2012	Western Europe	Human samples	AACe1	1
2012	Western Europe	Human samples	AACf1	2
2012	Western Europe	Human samples	AACh	2
2012	Western Europe	Human samples	ANTd	1
2012	Western Europe	Soil	AACf1	1
2012	Western Europe	Soil	AACg	1
2012	Western Europe	Soil	ANTa	1
2012	Western Europe	Soil	APHf	1
2013	Brazil	Agrosystems	AACf1	1
2013	Brazil	Clinical samples	AACe1	2
2013	Brazil	Clinical samples	AACh	1
2013	Brazil	Clinical samples	ANTa	1
2013	Brazil	Clinical samples	ANTd	1
2013	Brazil	Farms, cattles	AACf1	1
2013	Canada	Clinical samples	AACf1	1
2013	Canada	Clinical samples	AACj	3
2013	Canada	Farms, cattles	ANTa	2
2013	Canada	Farms, cattles	ANTb	1
2013	Canada	Flora, fauna	AACd	1
2013	Central Europe	Clinical samples	AACe1	69
2013	Central Europe	Clinical samples	AACh	39
2013	Central Europe	Human samples	AACe1	1
2013	China+	Agrosystems	AACf1	1
2013	China+	Agrosystems	ANTa	1
2013	China+	Clinical samples	AACa	6
2013	China+	Clinical samples	AACd	1
2013	China+	Clinical samples	AACe1	19
2013	China+	Clinical samples	AACf1	2
2013	China+	Clinical samples	AACg	1
2013	China+	Clinical samples	AACh	6
2013	China+	Clinical samples	AACi	1
2013	China+	Clinical samples	AACj	32
2013	China+	Clinical samples	ANTa	2
2013	China+	Clinical samples	ANTb	1
2013	China+	Clinical samples	APHa	1
2013	China+	Clinical samples	APHf	2
2013	China+	Farms, cattles	AACg	1
2013	China+	Farms, cattles	AACh	1
2013	China+	Farms, cattles	AACi	2
2013	China+	Farms, cattles	ANTa	1
[truncated: 791 more rows]
