# Supplementary material for: Ecology, more than antibiotics consumption, is the major predictor for the global distribution of aminoglycoside-modifying enzymes
Source: eLife. 2023 Feb 14;12:e77015. doi: 10.7554/eLife.77015 (PMC9928423; doi:10.7554/eLife.77015)
Supplement: Source data 4. [file elife-77015-data4.csv]

CHG	enzymatic_function	sequence_accession	database
AACa	N-acetyltransferase	X15852.1	NCBI Nucleotide
AACa	N-acetyltransferase	AF550679.1	NCBI Nucleotide
AACa	N-acetyltransferase	L06157.1	NCBI Nucleotide
AACa	N-acetyltransferase	AJ511268.1	NCBI Nucleotide
AACa	N-acetyltransferase	AY458224.1	NCBI Nucleotide
AACa	N-acetyltransferase	AY463797.8	NCBI Nucleotide
AACa	N-acetyltransferase	DQ520937.1	NCBI Nucleotide
AACa	N-acetyltransferase	1BO4	UniProt
AACa	N-acetyltransferase	4YFJ	UniProt
AACb	N-acetyltransferase	X13543	NCBI Nucleotide
AACb	N-acetyltransferase	X55652	NCBI Nucleotide
AACb	N-acetyltransferase	L06160	NCBI Nucleotide
AACb	N-acetyltransferase	L06161	NCBI Nucleotide
AACb	N-acetyltransferase	X01385.1	NCBI Nucleotide
AACb	N-acetyltransferase	M88012	NCBI Nucleotide
AACb	N-acetyltransferase	M22999	NCBI Nucleotide
AACb	N-acetyltransferase	M55426	NCBI Nucleotide
AACb	N-acetyltransferase	M55427	NCBI Nucleotide
AACb	N-acetyltransferase	AB028210	NCBI Nucleotide
AACb	N-acetyltransferase	X01385.1	NCBI Nucleotide
AACc	N-acetyltransferase	L06156.2	NCBI Nucleotide
AACc	N-acetyltransferase	CP001658.1	NCBI Nucleotide
AACc	N-acetyltransferase	NC_002945.4	NCBI Nucleotide
AACc	N-acetyltransferase	NC_008596.1	NCBI Nucleotide
AACc	N-acetyltransferase	5US1	UniProt
AACc	N-acetyltransferase	1M44	UniProt
AACc	N-acetyltransferase	1M4D	UniProt
AACc	N-acetyltransferase	1M4G	UniProt
AACc	N-acetyltransferase	1M4I	UniProt
AACd	N-acetyltransferase	M86913.1	NCBI Nucleotide
AACd	N-acetyltransferase	AF047479.2	NCBI Nucleotide
AACd	N-acetyltransferase	M18967.1	NCBI Nucleotide
AACd	N-acetyltransferase	L12710.1	NCBI Nucleotide
AACd	N-acetyltransferase	Z54241.1	NCBI Nucleotide
AACd	N-acetyltransferase	AF047556.1	NCBI Nucleotide
AACd	N-acetyltransferase	AB104852.1	NCBI Nucleotide
AACd	N-acetyltransferase	AB462903.1	NCBI Nucleotide
AACd	N-acetyltransferase	EU886977.1	NCBI Nucleotide
AACd	N-acetyltransferase	2A4N	UniProt
AACd	N-acetyltransferase	5E+096	UniProt
AACd	N-acetyltransferase	1B87	UniProt
AACe	N-acetyltransferase	AF479774.1	NCBI Nucleotide
AACe	N-acetyltransferase	M23634.1	NCBI Nucleotide
AACe	N-acetyltransferase	M21682.1	NCBI Nucleotide
AACe	N-acetyltransferase	L25617.1	NCBI Nucleotide
AACe	N-acetyltransferase	AJ584652.2	NCBI Nucleotide
AACe	N-acetyltransferase	L25666.1	NCBI Nucleotide
AACe	N-acetyltransferase	X60321.1	NCBI Nucleotide
AACe	N-acetyltransferase	S49888.1	NCBI Nucleotide
AACe	N-acetyltransferase	Y11946.1	NCBI Nucleotide
AACe	N-acetyltransferase	Y11947.1	NCBI Nucleotide
AACe	N-acetyltransferase	AF043381.1	NCBI Nucleotide
AACe	N-acetyltransferase	AY136758.1	NCBI Nucleotide
AACe	N-acetyltransferase	M29695.1	NCBI Nucleotide
AACe	N-acetyltransferase	L06163.1	NCBI Nucleotide
AACe	N-acetyltransferase	NC_012555.1	NCBI Nucleotide
AACe	N-acetyltransferase	2QIR	UniProt
AACe	N-acetyltransferase	1V0C	UniProt
AACe	N-acetyltransferase	2BUE	UniProt
AACe	N-acetyltransferase	2VQY	UniProt
AACf	N-acetyltransferase	M94066.1	NCBI Nucleotide
AACf	N-acetyltransferase	X55353.1	NCBI Nucleotide
AACf	N-acetyltransferase	L09246.1	NCBI Nucleotide
AACf	N-acetyltransferase	L29044.1	NCBI Nucleotide
AACf	N-acetyltransferase	L29045.1	NCBI Nucleotide
AACf	N-acetyltransferase	L29510.1	NCBI Nucleotide
AACf	N-acetyltransferase	U13880.2	NCBI Nucleotide
AACf	N-acetyltransferase	AF031326.1	NCBI Nucleotide
AACf	N-acetyltransferase	AF031327.1	NCBI Nucleotide
AACf	N-acetyltransferase	AF031328.1	NCBI Nucleotide
AACf	N-acetyltransferase	AF031329.1	NCBI Nucleotide
AACf	N-acetyltransferase	AF031330.1	NCBI Nucleotide
AACf	N-acetyltransferase	AF031331.1	NCBI Nucleotide
AACf	N-acetyltransferase	AF140221.1	NCBI Nucleotide
AACf	N-acetyltransferase	AF031332.1	NCBI Nucleotide
AACf	N-acetyltransferase	AF144881.1	NCBI Nucleotide
AACf	N-acetyltransferase	NC_003197.2	NCBI Nucleotide
AACf	N-acetyltransferase	AB119105.1	NCBI Nucleotide
AACf	N-acetyltransferase	1S60	UniProt
AACf	N-acetyltransferase	2VBQ	UniProt
AACf	N-acetyltransferase	1S3Z	UniProt
AACf	N-acetyltransferase	1S5K	UniProt
AACf	N-acetyltransferase	4F0Y	UniProt
AACf	N-acetyltransferase	4EVY	UniProt
AACg	N-acetyltransferase	M18086.1	NCBI Nucleotide
AACg	N-acetyltransferase	AF337947.1	NCBI Nucleotide
AACg	N-acetyltransferase	6BFF	UniProt
AACg	N-acetyltransferase	6BFH	UniProt
AACg	N-acetyltransferase	4QC6	UniProt
AACh	N-acetyltransferase	M97172	NCBI Nucleotide
AACh	N-acetyltransferase	X54723	NCBI Nucleotide
AACi	N-acetyltransferase	AJ493432	NCBI Nucleotide
AACj	N-acetyltransferase	CP001172.1	NCBI Nucleotide
AACk	N-acetyltransferase	NC_009838.1	NCBI Nucleotide
AACl	N-acetyltransferase	NC_009140.1	NCBI Nucleotide
AACm	N-acetyltransferase	AB116646.1	NCBI Nucleotide
AACn	N-acetyltransferase	4E+080	UniProt
ANTa	nucleotidyltransferase	AY712687.1	NCBI Nucleotide
ANTa	nucleotidyltransferase	NC_008445.1	NCBI Nucleotide
ANTa	nucleotidyltransferase	AJ489618.1	NCBI Nucleotide
ANTa	nucleotidyltransferase	M26879.1	NCBI Nucleotide
ANTa	nucleotidyltransferase	NC_013853.1	NCBI Nucleotide
ANTa	nucleotidyltransferase	AB247327.1	NCBI Nucleotide
ANTa	nucleotidyltransferase	GQ900487.1	NCBI Nucleotide
ANTa	nucleotidyltransferase	NC_012924.1	NCBI Nucleotide
ANTa	nucleotidyltransferase	NC_006663.1	NCBI Nucleotide
ANTa	nucleotidyltransferase	NZ_ABDU01000081.2	NCBI Nucleotide
ANTa	nucleotidyltransferase	FN594949.1	NCBI Nucleotide
ANTa	nucleotidyltransferase	2PBE	UniProt
ANTb	nucleotidyltransferase	M19465.1	NCBI Nucleotide
ANTb	nucleotidyltransferase	1KNY	UniProt
ANTc	nucleotidyltransferase	M98270.1	NCBI Nucleotide
ANTc	nucleotidyltransferase	AY114142.1	NCBI Nucleotide
ANTc	nucleotidyltransferase	4EBJ	UniProt
ANTc	nucleotidyltransferase	4EBK	UniProt
ANTd	nucleotidyltransferase	X04555.1	NCBI Nucleotide
ANTd	nucleotidyltransferase	4XJE	UniProt
ANTd	nucleotidyltransferase	5CFT	UniProt
ANTd	nucleotidyltransferase	5CFS	UniProt
ANTd	nucleotidyltransferase	5CFU	UniProt
ANTd	nucleotidyltransferase	4WQK	UniProt
ANTd	nucleotidyltransferase	4WQL	UniProt
ANTd	nucleotidyltransferase	5KQJ	UniProt
ANTe	nucleotidyltransferase	U35229.1	NCBI Nucleotide
ANTf	nucleotidyltransferase	X02588.1	NCBI Nucleotide
ANTf	nucleotidyltransferase	M69221	NCBI Nucleotide
ANTf	nucleotidyltransferase	X02340.1	NCBI Nucleotide
ANTf	nucleotidyltransferase	NC_010870.1	NCBI Nucleotide
ANTf	nucleotidyltransferase	NC_002928.3	NCBI Nucleotide
ANTf	nucleotidyltransferase	NC_010558.1	NCBI Nucleotide
ANTf	nucleotidyltransferase	AF137361.1	NCBI Nucleotide
ANTf	nucleotidyltransferase	AM087411.1	NCBI Nucleotide
ANTf	nucleotidyltransferase	AB114632.1	NCBI Nucleotide
ANTf	nucleotidyltransferase	AY139603.1	NCBI Nucleotide
ANTf	nucleotidyltransferase	NC_003227.1	NCBI Nucleotide
ANTf	nucleotidyltransferase	AM087405.1	NCBI Nucleotide
ANTf	nucleotidyltransferase	AJ567827.1	NCBI Nucleotide
ANTf	nucleotidyltransferase	AY758206.1	NCBI Nucleotide
ANTf	nucleotidyltransferase	FJ381668.1	NCBI Nucleotide
ANTf	nucleotidyltransferase	NC_010643.1	NCBI Nucleotide
ANTf	nucleotidyltransferase	AJ884726.1	NCBI Nucleotide
ANTf	nucleotidyltransferase	DQ393783.1	NCBI Nucleotide
ANTf	nucleotidyltransferase	EU675686.2	NCBI Nucleotide
ANTf	nucleotidyltransferase	FJ460181.2	NCBI Nucleotide
ANTf	nucleotidyltransferase	AY171244.1	NCBI Nucleotide
ANTf	nucleotidyltransferase	AM261837.1	NCBI Nucleotide
ANTf	nucleotidyltransferase	AJ809407.1	NCBI Nucleotide
ANTf	nucleotidyltransferase	DQ677333.1	NCBI Nucleotide
ANTf	nucleotidyltransferase	4CS6	UniProt
ANTf	nucleotidyltransferase	5G4A	UniProt
APHa	phosphotransferase	V01499.1	NCBI Nucleotide
APHa	phosphotransferase	3W0O	UniProt
APHa	phosphotransferase	3TYK	UniProt
APHa	phosphotransferase	3W0M	UniProt
APHa	phosphotransferase	3W0N	UniProt
APHb	phosphotransferase	Y00459	NCBI Nucleotide
APHb	phosphotransferase	X05648	NCBI Nucleotide
APHc	phosphotransferase	M28829.1	NCBI Nucleotide
APHc	phosphotransferase	V00359.1	NCBI Nucleotide
APHc	phosphotransferase	M20305.1	NCBI Nucleotide
APHc	phosphotransferase	V00618.1	NCBI Nucleotide
APHc	phosphotransferase	NC_002516.2	NCBI Nucleotide
APHc	phosphotransferase	V01547.1	NCBI Nucleotide
APHc	phosphotransferase	X03364.1	NCBI Nucleotide
APHc	phosphotransferase	K00432.1	NCBI Nucleotide
APHc	phosphotransferase	M22126.1	NCBI Nucleotide
APHc	phosphotransferase	S81599.1	NCBI Nucleotide
APHc	phosphotransferase	X07753.1	NCBI Nucleotide
APHc	phosphotransferase	M29953.1	NCBI Nucleotide
APHc	phosphotransferase	X53527.1	NCBI Nucleotide
APHc	phosphotransferase	DQ336355.1	NCBI Nucleotide
APHc	phosphotransferase	4EJ7	UniProt
APHc	phosphotransferase	4FEU	UniProt
APHc	phosphotransferase	4FEV	UniProt
APHc	phosphotransferase	4FEX	UniProt
APHc	phosphotransferase	4FEW	UniProt
APHc	phosphotransferase	2BKK	UniProt
APHd	phosphotransferase	CR628337.1	NCBI Nucleotide
APHd	phosphotransferase	U94857.1	NCBI Nucleotide
APHd	phosphotransferase	3I0O	UniProt
APHd	phosphotransferase	3I0Q	UniProt
APHd	phosphotransferase	3I1A	UniProt
APHd	phosphotransferase	3Q2M	UniProt
APHe	phosphotransferase	X03615.1	NCBI Nucleotide
APHf	phosphotransferase	X01702	NCBI Nucleotide
APHg	phosphotransferase	U70376.2	NCBI Nucleotide
APHh	phosphotransferase	U51479.1	NCBI Nucleotide
APHi	phosphotransferase	GU235985	NCBI Nucleotide
APHi	phosphotransferase	AP003367.1	NCBI Nucleotide
APHi	phosphotransferase	AF207840.1	NCBI Nucleotide
APHi	phosphotransferase	AF337947.1	NCBI Nucleotide
APHi	phosphotransferase	AF016483.1	NCBI Nucleotide
APHi	phosphotransferase	AY939911.1	NCBI Nucleotide
APHi	phosphotransferase	4DCA	UniProt
APHi	phosphotransferase	3HAM	UniProt
APHi	phosphotransferase	3HAV	UniProt
APHi	phosphotransferase	5C4K	UniProt
APHi	phosphotransferase	5C4L	UniProt
APHi	phosphotransferase	4N57	UniProt
APHi	phosphotransferase	4DT8	UniProt
APHi	phosphotransferase	4DT9	UniProt
APHi	phosphotransferase	4DTA	UniProt
APHi	phosphotransferase	3SG8	UniProt
APHi	phosphotransferase	3SG9	UniProt
