# Supplementary material for: Ecology, more than antibiotics consumption, is the major predictor for the global distribution of aminoglycoside-modifying enzymes
Source: eLife. 2023 Feb 14;12:e77015. doi: 10.7554/eLife.77015 (PMC9928423; doi:10.7554/eLife.77015)
Supplement: Supplementary file 1. [file elife-77015-supp1.doc]

**Supplementary file 1a: Summary of the selected model for AACa.** *: p<0.05, **: p<0.01, ***: p<0.001.

| Autoregression coefficient φ = -0.6, Matérn smoothness ν = 2.5 × 10-2, Matérn scaling ρ = 8.9 | | | | |
| --- | --- | --- | --- | --- |
| **Variable** | **Estimate** | **Conditional standard error** | **t** | **p** |
| *Intercept* | -9.1 | 1.1 | -8.3 | 1.1 × 10-16 *** |
| *Domestic animals* | -28.4 | 6.2 × 106 | -4.6 × 10-6 | 1.0 |
| *Farms* | -28.5 | 1.6 × 106 | -1.8 × 10-5 | 1.0 |
| *Flora, fauna* | -29.5 | 8.8 × 106 | -3.4 × 10-6 | 1.0 |
| *Human samples* | -28.1 | 2.1 × 106 | -1.3 × 10-5 | 1.0 |
| *Human habitat* | -27.6 | 1.3 × 107 | -2.1 × 10-6 | 1.0 |
| *Freshwater* | -29.9 | 9.1 × 106 | -3.3 × 10-6 | 1.0 |
| *Clinical samples* | 1.9 | 0.8 | 2.5 | 1.4 × 10-2 * |
| *Sludge, waste* | -27.9 | 4.5 × 106 | -6.1 × 10-6 | 1.0 |
| *Soil* | -28.9 | 6.2 × 106 | -4.7 × 10-6 | 1.0 |
| *Aminoglycosides* | 0.5 | 0.2 | 2.0 | 4.7 × 10-2 * |

**Supplementary file 1b: Summary of the selected model for AACb.** *: p<0.05, **: p<0.01, ***: p<0.001.

| Autoregression coefficient φ = 0.6, Matérn smoothness ν = 0.8, Matérn scaling ρ = 4.9 | | | | |
| --- | --- | --- | --- | --- |
| **Variable** | **Estimate** | **Conditional standard error** | **t** | **p** |
| *Intercept* | -12.8 | 3.5 | -3.7 | 2.4 × 10-4 *** |
| *Domestic animals* | -24.2 | 6.5 × 104 | -3.7 × 10-4 | 1.0 |
| *Farms* | -5.0 | 0.6 | -8.0 | 8.9 × 10-16 *** |
| *Flora, fauna* | -25.0 | 2.1 × 105 | -1.2 × 10-4 | 1.0 |
| *Human samples* | -24.8 | 3.7 × 104 | -6.8 × 10-4 | 1.0 |
| *Human habitat* | -24.7 | 2.5 × 105 | -9.7 × 10-5 | 1.0 |
| *Freshwater* | -2.6 | 1.9 | -1.4 | 0.2 |
| *Clinical samples* | -4.9 | 0.6 | -7.8 | 8.4 × 10-15 *** |
| *Sludge, waste* | -24.7 | 3.7 × 104 | -6.6 × 10-4 | 1.0 |
| *Soil* | -3.1 | 1.4 | -2.1 | 3.3 × 10-2 * |
| *Aminoglycosides* | -1.8 | 1.7 | -1.1 | 0.3 |
| *Trade* | -0.7 | 0.4 | -1.9 | 5.8 × 10-2 |
| *Migration* | 1.8 | 0.9 | 2.0 | 4.5 × 10-2 * |
| *Domestic animals × Aminoglycosides* | 5.9 | 2.1 × 105 | 2.8 × 10-5 | 1.0 |
| *Farms × Aminoglycosides* | 5.1 | 2.0 | 2.5 | 1.2 × 10-2 * |
| *Flora, fauna × Aminoglycosides* | 0.2 | 9.6 × 105 | 2.5 × 10-7 | 1.0 |
| *Human samples × Aminoglycosides* | 2.9 | 8.1 × 104 | 3.6 × 10-5 | 1.0 |
| *Human habitat × Aminoglycosides* | 2.9 | 8.4 × 105 | 3.5 × 10-6 | 1.0 |
| *Freshwater × Aminoglycosides* | 4.6 | 2.7 | 1.7 | 8.6 × 10-2 |
| *Clinical samples × Aminoglycosides* | 5.4 | 1.7 | 3.1 | 1.7 × 10-3 ** |
| *Sludge, waste × Aminoglycosides* | 3.7 | 1.5 × 105 | 2.5 × 10-5 | 1.0 |
| *Soil × Aminoglycosides* | 3.3 | 3.7 | 0.9 | 0.4 |

**Supplementary file 1c: Summary of the selected model for AACc.** *: p<0.05, **: p<0.01, ***: p<0.001.

| Autoregression coefficient φ = 0.1, Matérn smoothness ν = 15.7, Matérn scaling ρ = 8.3 | | | | |
| --- | --- | --- | --- | --- |
| **Variable** | **Estimate** | **Conditional standard error** | **t** | **p** |
| *Intercept* | -21.2 | 4.2 | -5.1 | 3.6 × 10-7 *** |
| *Domestic animals* | -2.0 × 102 | 5.1 × 106 | -4.0 × 10-5 | 1.0 |
| *Farms* | -3.2 × 102 | 1.4 × 106 | -2.2 × 10-4 | 1.0 |
| *Flora, fauna* | -3.8 × 102 | 7.7 × 106 | -4.9 × 10-5 | 1.0 |
| *Human samples* | 2.8 | 1.7 | 1.7 | 9.1 × 10-2 |
| *Human habitat* | -2.1 × 102 | 1.4 × 107 | -1.5 × 10-5 | 1.0 |
| *Freshwater* | -2.7 × 103 | 8.6 × 106 | -3.2 × 10-4 | 1.0 |
| *Clinical samples* | 7.0 | 1.1 | 6.4 | 2.0 × 10-10 *** |
| *Sludge, waste* | -4.7 × 102 | 1.0 × 107 | -4.5 × 10-5 | 1.0 |
| *Soil* | 5.0 | 1.6 | 3.1 | 2.2 × 10-3 ** |
| *Aminoglycosides* | 5.1 | 1.4 | 3.7 | 2.5 × 10-4 *** |
| *Trade* | -1.7 | 0.3 | -4.9 | 8.6 × 10-7 *** |
| *Migration* | 2.8 | 0.8 | 3.6 | 3.1 × 10-4 *** |
| *Domestic animals × Aminoglycosides* | 87.1 | 2.1 × 106 | 4.1 × 10-5 | 1.0 |
| *Farms × Aminoglycosides* | 56.5 | 2.6 × 105 | 2.2 × 10-4 | 1.0 |
| *Flora, fauna × Aminoglycosides* | 2.4 × 102 | 4.9 × 106 | 5.0 × 10-5 | 1.0 |
| *Human samples × Aminoglycosides* | -4.1 | 3.1 | -1.3 | 0.2 |
| *Human habitat × Aminoglycosides* | 1.9 × 102 | 3.0 × 107 | 6.5 × 10-6 | 1.0 |
| *Freshwater × Aminoglycosides* | 2.1 × 103 | 1.1 × 107 | 1.9 × 10-4 | 1.0 |
| *Clinical samples × Aminoglycosides* | -1.2 | 1.4 | -0.9 | 0.4 |
| *Sludge, waste × Aminoglycosides* | -3.8 × 102 | 3.1 × 107 | -1.2 × 10-5 | 1.0 |
| *Soil × Aminoglycosides* | -1.2 | 3.2 | -0.4 | 0.7 |

**Supplementary file 1d: Summary of the selected model for AACd.** *: p<0.05, **: p<0.01, ***: p<0.001.

| Autoregression coefficient φ = 0.4, Matérn smoothness ν = 16.7, Matérn scaling ρ = 1.3 | | | | |
| --- | --- | --- | --- | --- |
| **Variable** | **Estimate** | **Conditional standard error** | **t** | **p** |
| *Intercept* | -38.5 | 2.8 × 106 | -1.4 × 10-5 | 1.0 |
| *Domestic animals* | 0.1 | 7.9 × 106 | 1.5 × 10-8 | 1.0 |
| *Farms* | 27.8 | 2.8 × 106 | 9.9 × 10-6 | 1.0 |
| *Flora, fauna* | 33.5 | 2.8 × 106 | 1.2 × 10-5 | 1.0 |
| *Human samples* | 31.7 | 2.8 × 106 | 1.1 × 10-5 | 1.0 |
| *Human habitat* | -0.8 | 1.3 × 107 | -6.4 × 10-8 | 1.0 |
| *Freshwater* | -0.2 | 9.1 × 106 | -1.9 × 10-8 | 1.0 |
| *Clinical samples* | 32.5 | 2.8 × 106 | 1.2 × 10-5 | 1.0 |
| *Sludge, waste* | 0.2 | 1.1 × 107 | 1.5 × 10-8 | 1.0 |
| *Soil* | 0.4 | 6.4 × 106 | 6.9 × 10-8 | 1.0 |
| *Aminoglycosides* | -0.3 | 4.3 × 106 | -6.8 × 10-8 | 1.0 |
| *Domestic animals × Aminoglycosides* | -0.7 | 1.6 × 107 | -4.3 × 10-8 | 1.0 |
| *Farms × Aminoglycosides* | -9.8 | 4.3 × 106 | -2.3 × 10-6 | 1.0 |
| *Flora, fauna × Aminoglycosides* | -3.9 | 4.3 × 106 | -9.0 × 10-7 | 1.0 |
| *Human samples × Aminoglycosides* | -5.7 × 10-2 | 4.3 × 106 | -1.3 × 10-8 | 1.0 |
| *Human habitat × Aminoglycosides* | -3.3 | 2.6 × 107 | -1.3 × 10-7 | 1.0 |
| *Freshwater × Aminoglycosides* | -5.9 × 10-2 | 1.2 × 107 | -4.8 × 10-9 | 1.0 |
| *Clinical samples × Aminoglycosides* | 0.2 | 4.3 × 106 | 4.6 × 10-8 | 1.0 |
| *Sludge, waste × Aminoglycosides* | -2.5 | 3.2 × 107 | -7.9 × 10-8 | 1.0 |
| *Soil × Aminoglycosides* | -0.4 | 9.2 × 106 | -4.0 × 10-8 | 1.0 |

**Supplementary file 1e: Summary of the selected model for AACe1.** *: p<0.05, **: p<0.01, ***: p<0.001.

| Autoregression coefficient φ = 0.6, Matérn smoothness ν = 0.4, Matérn scaling ρ = 0.1 | | | | |
| --- | --- | --- | --- | --- |
| **Variable** | **Estimate** | **Conditional standard error** | **t** | **p** |
| *Intercept* | -7.0 | 1.8 | -3.8 | 1.4 × 10-4 *** |
| *Domestic animals* | -64.8 | 1.6 × 106 | -3.9 × 10-5 | 1.0 |
| *Farms* | -2.3 | 1.9 | -1.2 | 0.2 |
| *Flora, fauna* | -3.2 | 6.5 | -0.5 | 0.6 |
| *Human samples* | 2.4 | 1.6 | 1.5 | 0.1 |
| *Human habitat* | -6.8 × 102 | 1.2 × 106 | -5.6 × 10-4 | 1.0 |
| *Freshwater* | -31.9 | 8.7 × 106 | -3.7 × 10-6 | 1.0 |
| *Clinical samples* | 3.7 | 1.6 | 2.3 | 2.0 × 10-2 * |
| *Sludge, waste* | -3.7 | 10.6 | -0.4 | 0.7 |
| *Soil* | -31.6 | 6.8 × 106 | -4.7 × 10-6 | 1.0 |
| *Aminoglycosides* | 0.2 | 8.1 × 10-2 | 2.9 | 3.7 × 10-3 ** |
| *Trade* | 0.8 | 1.7 | 0.5 | 0.6 |
| *Migration* | -2.1 | 2.7 | -0.8 | 0.4 |
| *Domestic animals × Trade* | 15.1 | 6.0 × 105 | 2.5 × 10-5 | 1.0 |
| *Farms × Trade* | 3.0 | 1.9 | 1.6 | 0.1 |
| *Flora, fauna × Trade* | -16.2 | 10.5 | -1.6 | 0.1 |
| *Human samples × Trade* | -0.2 | 1.7 | -9.8 × 10-2 | 0.9 |
| *Human habitat × Trade* | 8.5 × 102 | 1.5 × 106 | 5.6 × 10-4 | 1.0 |
| *Freshwater × Trade* | -0.9 | 1.2 × 107 | -7.4 × 10-8 | 1.0 |
| *Clinical samples × Trade* | -0.9 | 1.7 | -0.5 | 0.6 |
| *Sludge, waste × Trade* | 1.4 × 10-2 | 7.1 | 1.9 × 10-3 | 1.0 |
| *Soil × Trade* | -1.0 | 8.5 × 106 | -1.2 × 10-7 | 1.0 |
| *Domestic animals × Migration* | 3.8 | 7.3 × 105 | 5.1 × 10-6 | 1.0 |
| *Farms × Migration* | -2.0 | 2.9 | -0.7 | 0.5 |
| *Flora, fauna × Migration* | 3.3 | 3.0 | 1.1 | 0.3 |
| *Human samples × Migration* | 1.5 | 2.7 | 0.5 | 0.6 |
| *Human habitat × Migration* | -1.2 × 103 | 2.1 × 106 | -5.6 × 10-4 | 1.0 |
| *Freshwater × Migration* | 2.2 | 1.1 × 107 | 1.9 × 10-7 | 1.0 |
| *Clinical samples × Migration* | 2.0 | 2.7 | 0.7 | 0.5 |
| *Sludge, waste × Migration* | 4.3 | 7.1 | 0.6 | 0.5 |
| *Soil × Migration* | 1.9 | 8.3 × 106 | 2.3 × 10-7 | 1.0 |

**Supplementary file 1f: Summary of the selected model for AACf1.** *: p<0.05, **: p<0.01, ***: p<0.001.

| Autoregression coefficient φ = -1.0, Matérn smoothness ν = 16.7, Matérn scaling ρ = 1.5 | | | | |
| --- | --- | --- | --- | --- |
| **Variable** | **Estimate** | **Conditional standard error** | **t** | **p** |
| *Intercept* | -4.6 | 1.6 | -2.9 | 3.3 × 10-3 ** |
| *Domestic animals* | -2.0 × 102 | 2.0 × 106 | -1.0 × 10-4 | 1.0 |
| *Farms* | 0.2 | 0.6 | 0.3 | 0.8 |
| *Flora, fauna* | -33.2 | 1.1 × 107 | -3.0 × 10-6 | 1.0 |
| *Human samples* | 0.6 | 0.6 | 1.0 | 0.3 |
| *Human habitat* | 1.8 | 1.1 | 1.7 | 9.0 × 10-2 |
| *Freshwater* | -1.4 | 1.4 | -1.0 | 0.3 |
| *Clinical samples* | -1.1 | 0.6 | -1.9 | 5.8 × 10-2 |
| *Sludge, waste* | -1.9 × 102 | 1.1 × 106 | -1.7 × 10-4 | 1.0 |
| *Soil* | 1.1 | 0.7 | 1.6 | 0.1 |
| *Aminoglycosides* | -1.6 | 0.7 | -2.2 | 3.0 × 10-2 * |
| *Trade* | 1.0 | 0.6 | 1.6 | 0.1 |
| *Migration* | -0.7 | 0.5 | -1.5 | 0.1 |
| *Domestic animals × Aminoglycosides* | -1.8 × 102 | 1.1 × 107 | -1.6 × 10-5 | 1.0 |
| *Farms × Aminoglycosides* | 0.9 | 0.8 | 1.1 | 0.2 |
| *Flora, fauna × Aminoglycosides* | -0.2 | 1.5 × 107 | -1.1 × 10-8 | 1.0 |
| *Human samples × Aminoglycosides* | 4.7 × 10-3 | 0.9 | 5.5 × 10-3 | 1.0 |
| *Human habitat × Aminoglycosides* | -0.5 | 1.8 | -0.3 | 0.8 |
| *Freshwater × Aminoglycosides* | -1.6 | 1.9 | -0.9 | 0.4 |
| *Clinical samples × Aminoglycosides* | 2.1 | 0.7 | 2.8 | 4.8 × 10-3 ** |
| *Sludge, waste × Aminoglycosides* | -2.4 × 102 | 1.5 × 106 | -1.5 × 10-4 | 1.0 |
| *Soil × Aminoglycosides* | 2.6 | 0.8 | 3.1 | 1.7 × 10-3 ** |
| *Domestic animals × Trade* | 37.6 | 6.1 × 105 | 6.2 × 10-5 | 1.0 |
| *Farms × Trade* | -2.0 | 0.6 | -3.5 | 5.0 × 10-4 *** |
| *Flora, fauna × Trade* | -1.9 × 10-5 | 1.4 × 107 | -1.3 × 10-12 | 1.0 |
| *Human samples × Trade* | -1.6 | 0.6 | -2.8 | 5.0 × 10-3 ** |
| *Human habitat × Trade* | -0.6 | 1.1 | -0.5 | 0.6 |
| *Freshwater × Trade* | 2.4 | 1.3 | 1.9 | 5.9 × 10-2 |
| *Clinical samples × Trade* | -1.4 | 0.6 | -2.4 | 1.5 × 10-2 * |
| *Sludge, waste × Trade* | -1.2 × 102 | 7.2 × 105 | -1.7 × 10-4 | 1.0 |
| *Soil × Trade* | -2.2 | 0.8 | -2.9 | 3.4 × 10-3 ** |
| *Domestic animals × Migration* | 47.1 | 4.3 × 106 | 1.1 × 10-5 | 1.0 |
| *Farms × Migration* | 1.8 | 0.5 | 3.8 | 1.8 × 10-4 *** |
| *Flora, fauna × Migration* | 0.6 | 1.1 × 107 | 5.4 × 10-8 | 1.0 |
| *Human samples × Migration* | 1.8 | 0.5 | 3.7 | 2.4 × 10-4 *** |
| *Human habitat × Migration* | 0.2 | 1.5 | 0.2 | 0.9 |
| *Freshwater × Migration* | -3.0 | 1.2 | -2.5 | 1.2 × 10-2 * |
| *Clinical samples × Migration* | 1.1 | 0.5 | 2.3 | 2.3 × 10-2 * |
| *Sludge, waste × Migration* | -22.1 | 2.0 × 105 | -1.1 × 10-4 | 1.0 |
| *Soil × Migration* | 1.1 | 0.8 | 1.4 | 0.1 |

**Supplementary file 1g: Summary of the selected model for AACg.** *: p<0.05, **: p<0.01, ***: p<0.001.

| Autoregression coefficient φ = 0.9, Matérn smoothness ν = 1.3 × 10-2, Matérn scaling ρ = 0.5 | | | | |
| --- | --- | --- | --- | --- |
| **Variable** | **Estimate** | **Conditional standard error** | **t** | **p** |
| *Intercept* | -5.1 | 1.0 | -5.0 | 7.4 × 10-7 *** |
| *Domestic animals* | 0.5 | 1.5 | 0.3 | 0.8 |
| *Farms* | 0.3 | 0.9 | 0.3 | 0.7 |
| *Flora, fauna* | -6.4 × 102 | 6.8 × 105 | -9.4 × 10-4 | 1.0 |
| *Human samples* | 1.3 | 0.8 | 1.6 | 0.1 |
| *Human habitat* | -62.2 | 8.2 × 104 | -7.6 × 10-4 | 1.0 |
| *Freshwater* | -23.0 | 1.4 × 105 | -1.6 × 10-4 | 1.0 |
| *Clinical samples* | 6.7 × 10-2 | 0.8 | 8.2 × 10-2 | 0.9 |
| *Sludge, waste* | -23.8 | 3.0 × 105 | -8.0 × 10-5 | 1.0 |
| *Soil* | -3.8 × 102 | 1.9 × 105 | -2.0 × 10-3 | 1.0 |
| *Aminoglycosides* | -1.6 | 1.7 | -0.9 | 0.3 |
| *Trade* | -1.6 × 10-2 | 0.4 | -4.4 × 10-2 | 1.0 |
| *Migration* | -9.0 × 10-2 | 0.5 | -0.2 | 0.9 |
| *Domestic animals × Aminoglycosides* | 2.8 | 2.1 | 1.4 | 0.2 |
| *Farms × Aminoglycosides* | 1.9 | 1.8 | 1.1 | 0.3 |
| *Flora, fauna × Aminoglycosides* | -2.9 × 102 | 1.2 × 106 | -2.4 × 10-4 | 1.0 |
| *Human samples × Aminoglycosides* | 0.5 | 1.8 | 0.3 | 0.8 |
| *Human habitat × Aminoglycosides* | -45.0 | 8.8 × 104 | -5.1 × 10-4 | 1.0 |
| *Freshwater × Aminoglycosides* | 1.7 | 2.1 × 105 | 8.0 × 10-6 | 1.0 |
| *Clinical samples × Aminoglycosides* | 1.2 | 1.7 | 0.7 | 0.5 |
| *Sludge, waste × Aminoglycosides* | 1.3 | 6.7 × 105 | 1.9 × 10-6 | 1.0 |
| *Soil × Aminoglycosides* | -2.9 × 102 | 2.5 × 105 | -1.2 × 10-3 | 1.0 |
| *Domestic animals × Trade* | 0.3 | 0.7 | 0.4 | 0.7 |
| *Farms × Trade* | 0.4 | 0.4 | 1.0 | 0.3 |
| *Flora, fauna × Trade* | 1.1 × 102 | 1.1 × 105 | 1.0 × 10-3 | 1.0 |
| *Human samples × Trade* | 0.3 | 0.4 | 0.9 | 0.4 |
| *Human habitat × Trade* | 31.7 | 5.7 × 104 | 5.5 × 10-4 | 1.0 |
| *Freshwater × Trade* | -0.4 | 1.2 × 105 | -3.3 × 10-6 | 1.0 |
| *Clinical samples × Trade* | 1.4 × 10-2 | 0.4 | 3.9 × 10-2 | 1.0 |
| *Sludge, waste × Trade* | -0.2 | 2.5 × 105 | -9.7 × 10-7 | 1.0 |
| *Soil × Trade* | 1.2 × 102 | 5.7 × 104 | 2.2 × 10-3 | 1.0 |
| *Domestic animals × Migration* | -5.6 × 10-2 | 1.0 | -5.4 × 10-2 | 1.0 |
| *Farms × Migration* | -0.4 | 0.6 | -0.8 | 0.4 |
| *Flora, fauna × Migration* | -5.6 × 102 | 4.5 × 105 | -1.2 × 10-3 | 1.0 |
| *Human samples × Migration* | -5.8 × 10-2 | 0.5 | -0.1 | 0.9 |
| *Human habitat × Migration* | -3.6 | 8.0 × 104 | -4.4 × 10-5 | 1.0 |
| *Freshwater × Migration* | 0.3 | 1.5 × 105 | 2.2 × 10-6 | 1.0 |
| *Clinical samples × Migration* | 1.1 | 0.5 | 2.1 | 3.6 × 10-2 * |
| *Sludge, waste × Migration* | 0.2 | 3.2 × 105 | 6.8 × 10-7 | 1.0 |
| *Soil × Migration* | 11.3 | 4.2 × 104 | 2.7 × 10-4 | 1.0 |

**Supplementary file 1h: Summary of the selected model for ANTa.** *: p<0.05, **: p<0.01, ***: p<0.001.

| Autoregression coefficient φ = 0.5, Matérn smoothness ν = 0.1, Matérn scaling ρ = 0.2 | | | | |
| --- | --- | --- | --- | --- |
| **Variable** | **Estimate** | **Conditional standard error** | **t** | **p** |
| *Intercept* | -4.3 | 0.6 | -7.6 | 3.9 × 10-14 *** |
| *Domestic animals* | -2.6 | 1.7 | -1.5 | 0.1 |
| *Farms* | -1.0 | 0.5 | -1.9 | 6.3 × 10-2 |
| *Flora, fauna* | -1.0 | 2.5 | -0.4 | 0.7 |
| *Human samples* | 0.5 | 0.5 | 1.0 | 0.3 |
| *Human habitat* | -0.4 | 1.9 | -0.2 | 0.8 |
| *Freshwater* | -32.8 | 8.5 × 106 | -3.9 × 10-6 | 1.0 |
| *Clinical samples* | -1.0 | 0.5 | -2.1 | 3.4 × 10-2 * |
| *Sludge, waste* | -1.9 | 1.4 | -1.3 | 0.2 |
| *Soil* | -0.2 | 0.9 | -0.2 | 0.8 |
| *Trade* | 1.0 | 0.6 | 1.7 | 9.6 × 10-2 |
| *Migration* | -0.2 | 0.7 | -0.3 | 0.8 |
| *Domestic animals × Trade* | 1.7 | 1.4 | 1.3 | 0.2 |
| *Farms × Trade* | -0.1 | 0.6 | -0.2 | 0.9 |
| *Flora, fauna × Trade* | -0.1 | 2.6 | -4.9 × 10-2 | 1.0 |
| *Human samples × Trade* | -0.8 | 0.6 | -1.4 | 0.2 |
| *Human habitat × Trade* | 4.2 | 3.3 | 1.3 | 0.2 |
| *Freshwater × Trade* | -1.4 | 9.5 × 106 | -1.4 × 10-7 | 1.0 |
| *Clinical samples × Trade* | -0.8 | 0.6 | -1.4 | 0.2 |
| *Sludge, waste × Trade* | 1.5 | 7.9 | 0.2 | 0.9 |
| *Soil × Trade* | -4.0 | 1.9 | -2.1 | 3.8 × 10-2 * |
| *Domestic animals × Migration* | -3.7 | 2.3 | -1.6 | 0.1 |
| *Farms × Migration* | -1.2 | 0.9 | -1.4 | 0.2 |
| *Flora, fauna × Migration* | -1.3 | 4.1 | -0.3 | 0.8 |
| *Human samples × Migration* | 0.1 | 0.8 | 0.2 | 0.9 |
| *Human habitat × Migration* | -6.8 | 4.2 | -1.6 | 0.1 |
| *Freshwater × Migration* | 0.5 | 1.1 × 107 | 4.2 × 10-8 | 1.0 |
| *Clinical samples × Migration* | 1.1 | 0.7 | 1.5 | 0.1 |
| *Sludge, waste × Migration* | 3.3 × 10-2 | 2.9 | 1.2 × 10-2 | 1.0 |
| *Soil × Migration* | 1.1 | 0.8 | 1.4 | 0.2 |

**Supplementary file 1i: Summary of the selected model for ANTb.** *: p<0.05, **: p<0.01, ***: p<0.001.

| Autoregression coefficient φ = 0.4, Matérn smoothness ν = 16.7, Matérn scaling ρ = 1.7 | | | | |
| --- | --- | --- | --- | --- |
| **Variable** | **Estimate** | **Conditional standard error** | **t** | **p** |
| *Intercept* | -35.8 | 3.6 × 106 | -1.0 × 10-5 | 1.0 |
| *Domestic animals* | -44.4 | 6.8 × 106 | -6.5 × 10-6 | 1.0 |
| *Farms* | 29.8 | 3.6 × 106 | 8.4 × 10-6 | 1.0 |
| *Flora, fauna* | -45.4 | 8.5 × 106 | -5.3 × 10-6 | 1.0 |
| *Human samples* | 31.2 | 3.6 × 106 | 8.8 × 10-6 | 1.0 |
| *Human habitat* | -44.6 | 1.1 × 107 | -4.1 × 10-6 | 1.0 |
| *Freshwater* | -47.3 | 9.2 × 106 | -5.2 × 10-6 | 1.0 |
| *Clinical samples* | 30.0 | 3.6 × 106 | 8.4 × 10-6 | 1.0 |
| *Sludge, waste* | -43.3 | 5.7 × 106 | -7.5 × 10-6 | 1.0 |
| *Soil* | -45.2 | 6.6 × 106 | -6.8 × 10-6 | 1.0 |
| *Aminoglycosides* | -0.3 | 0.3 | -0.9 | 0.4 |
| *Trade* | 0.6 | 0.2 | 3.4 | 8.1 × 10-4 *** |
| *Migration* | -0.4 | 0.3 | -1.1 | 0.3 |

**Supplementary file 1j: Summary of the selected model for ANTb.** *: p<0.05, **: p<0.01, ***: p<0.001.

| Autoregression coefficient φ = -0.9, Matérn smoothness ν = 16.7, Matérn scaling ρ = 2.9 | | | | |
| --- | --- | --- | --- | --- |
| **Variable** | **Estimate** | **Conditional standard error** | **t** | **p** |
| *Intercept* | -32.0 | 2.8 × 105 | -1.2 × 10-4 | 1.0 |
| *Domestic animals* | -50.2 | 5.8 × 106 | -8.7 × 10-6 | 1.0 |
| *Farms* | 25.0 | 2.8 × 105 | 9.1 × 10-5 | 1.0 |
| *Flora, fauna* | -52.0 | 7.8 × 106 | -6.7 × 10-6 | 1.0 |
| *Human samples* | 26.1 | 2.8 × 105 | 9.5 × 10-5 | 1.0 |
| *Human habitat* | -50.0 | 1.0 × 107 | -4.8 × 10-6 | 1.0 |
| *Freshwater* | -58.8 | 8.5 × 106 | -7.0 × 10-6 | 1.0 |
| *Clinical samples* | 26.5 | 2.8 × 105 | 9.6 × 10-5 | 1.0 |
| *Sludge, waste* | -49.0 | 4.5 × 106 | -1.1 × 10-5 | 1.0 |
| *Soil* | -53.6 | 5.6 × 106 | -9.6 × 10-6 | 1.0 |

**Supplementary file 1k: Summary of the selected model for APHa.** *: p<0.05, **: p<0.01, ***: p<0.001.

| Autoregression coefficient φ = -4.0 × 10-4, Matérn smoothness ν = 3.6, Matérn scaling ρ = 8.0 | | | | |
| --- | --- | --- | --- | --- |
| **Variable** | **Estimate** | **Conditional standard error** | **t** | **p** |
| *Intercept* | -41.3 | 2.8 × 106 | -1.5 × 10-5 | 1.0 |
| *Domestic animals* | 4.3 | 6.8 × 106 | 6.4 × 10-7 | 1.0 |
| *Farms* | 36.1 | 2.8 × 106 | 1.3 × 10-5 | 1.0 |
| *Flora, fauna* | 4.0 | 9.8 × 106 | 4.1 × 10-7 | 1.0 |
| *Human samples* | 4.4 | 3.5 × 106 | 1.3 × 10-6 | 1.0 |
| *Human habitat* | 2.6 | 1.2 × 107 | 2.2 × 10-7 | 1.0 |
| *Freshwater* | 4.6 | 9.1 × 106 | 5.1 × 10-7 | 1.0 |
| *Clinical samples* | 33.1 | 2.8 × 106 | 1.2 × 10-5 | 1.0 |
| *Sludge, waste* | 2.1 | 5.3 × 106 | 3.9 × 10-7 | 1.0 |
| *Soil* | 3.9 | 7.0 × 106 | 5.6 × 10-7 | 1.0 |
| *Trade* | 0.9 | 0.1 | 6.6 | 5.3 × 10-11 *** |
| *Migration* | 0.2 | 0.2 | 0.7 | 0.5 |

**Supplementary file 1l: Summary of the selected model for APHd1.** *: p<0.05, **: p<0.01, ***: p<0.001.

| Autoregression coefficient φ = -7.6 × 10-9, Matérn smoothness ν = 16.7, Matérn scaling ρ = 3.3 | | | | |
| --- | --- | --- | --- | --- |
| **Variable** | **Estimate** | **Conditional standard error** | **t** | **p** |
| *Intercept* | -38.6 | 3.0 × 106 | -1.3 × 10-5 | 1.0 |
| *Domestic animals* | -1.4 | 7.1 × 106 | -2.0 × 10-7 | 1.0 |
| *Farms* | -0.5 | 3.4 × 106 | -1.4 × 10-7 | 1.0 |
| *Flora, fauna* | 0.5 | 9.4 × 106 | 5.3 × 10-8 | 1.0 |
| *Human samples* | 28.5 | 3.0 × 106 | 9.4 × 10-6 | 1.0 |
| *Human habitat* | 1.0 | 1.2 × 107 | 8.6 × 10-8 | 1.0 |
| *Freshwater* | 31.0 | 3.0 × 106 | 1.0 × 10-5 | 1.0 |
| *Clinical samples* | 30.8 | 3.0 × 106 | 1.0 × 10-5 | 1.0 |
| *Sludge, waste* | 30.9 | 3.0 × 106 | 1.0 × 10-5 | 1.0 |
| *Soil* | 0.4 | 6.8 × 106 | 5.4 × 10-8 | 1.0 |
| *Aminoglycosides* | -3.5 | 1.2 | -3.0 | 3.1 × 10-3 ** |
| *Trade* | 0.3 | 0.3 | 1.0 | 0.3 |
| *Migration* | 0.7 | 0.4 | 1.7 | 9.4 × 10-2 |

**Supplementary file 1m: Summary of the selected model for AACh.** *: p<0.05, **: p<0.01, ***: p<0.001.

| Autoregression coefficient φ = -0.9, Matérn smoothness ν = 16.7, Matérn scaling ρ = 1.5 | | | | |
| --- | --- | --- | --- | --- |
| **Variable** | **Estimate** | **Conditional standard error** | **t** | **p** |
| *Intercept* | -6.8 | 1.4 | -4.9 | 1.1 × 10-6 *** |
| *Domestic animals* | -17.2 | 12.8 | -1.3 | 0.2 |
| *Farms* | 1.1 | 1.2 | 0.8 | 0.4 |
| *Flora, fauna* | -1.5 | 4.8 | -0.3 | 0.8 |
| *Human samples* | 1.6 | 1.3 | 1.2 | 0.2 |
| *Human habitat* | -1.3 × 102 | 1.9 × 106 | -6.7 × 10-5 | 1.0 |
| *Freshwater* | -30.5 | 8.7 × 106 | -3.5 × 10-6 | 1.0 |
| *Clinical samples* | 2.9 | 1.2 | 2.4 | 1.5 × 10-2 * |
| *Sludge, waste* | 1.6 | 2.4 | 0.7 | 0.5 |
| *Soil* | -30.4 | 7.5 × 106 | -4.0 × 10-6 | 1.0 |
| *Trade* | 0.3 | 0.7 | 0.4 | 0.7 |
| *Migration* | 0.8 | 1.2 | 0.6 | 0.5 |
| *Domestic animals × Trade* | -1.5 | 1.0 | -1.5 | 0.1 |
| *Farms × Trade* | 0.4 | 0.8 | 0.5 | 0.6 |
| *Flora, fauna × Trade* | -10.5 | 6.8 | -1.5 | 0.1 |
| *Human samples × Trade* | 0.3 | 0.8 | 0.4 | 0.7 |
| *Human habitat × Trade* | 1.2 × 102 | 1.4 × 106 | 8.5 × 10-5 | 1.0 |
| *Freshwater × Trade* | -0.4 | 1.0 × 107 | -4.0 × 10-8 | 1.0 |
| *Clinical samples × Trade* | -0.3 | 0.7 | -0.4 | 0.7 |
| *Sludge, waste × Trade* | -6.1 × 10-2 | 1.6 | -3.8 × 10-2 | 1.0 |
| *Soil × Trade* | -0.5 | 7.3 × 106 | -6.9 × 10-8 | 1.0 |
| *Domestic animals × Migration* | 16.8 | 9.5 | 1.8 | 7.6 × 10-2 |
| *Farms × Migration* | -1.9 | 1.3 | -1.5 | 0.1 |
| *Flora, fauna × Migration* | -0.9 | 1.6 | -0.5 | 0.6 |
| *Human samples × Migration* | -0.5 | 1.3 | -0.4 | 0.7 |
| *Human habitat × Migration* | -1.6 × 102 | 2.0 × 106 | -8.0 × 10-5 | 1.0 |
| *Freshwater × Migration* | -1.0 | 1.0 × 107 | -9.4 × 10-8 | 1.0 |
| *Clinical samples × Migration* | -1.2 | 1.2 | -0.9 | 0.3 |
| *Sludge, waste × Migration* | 0.4 | 1.9 | 0.2 | 0.8 |
| *Soil × Migration* | -0.9 | 7.5 × 106 | -1.2 × 10-7 | 1.0 |

**Supplementary file 1n: Summary of the selected model for AACi.** *: p<0.05, **: p<0.01, ***: p<0.001.

| Autoregression coefficient φ = 0.9, Matérn smoothness ν = 6.0 × 10-3, Matérn scaling ρ = 9.7 | | | | |
| --- | --- | --- | --- | --- |
| **Variable** | **Estimate** | **Conditional standard error** | **t** | **p** |
| *Intercept* | -38.6 | 3.1 × 106 | -1.2 × 10-5 | 1.0 |
| *Domestic animals* | 1.3 | 6.9 × 106 | 1.9 × 10-7 | 1.0 |
| *Farms* | 33.3 | 3.1 × 106 | 1.1 × 10-5 | 1.0 |
| *Flora, fauna* | 1.1 | 9.2 × 106 | 1.2 × 10-7 | 1.0 |
| *Human samples* | 2.1 | 3.7 × 106 | 5.6 × 10-7 | 1.0 |
| *Human habitat* | 0.4 | 1.2 × 107 | 2.9 × 10-8 | 1.0 |
| *Freshwater* | 1.5 | 9.1 × 106 | 1.7 × 10-7 | 1.0 |
| *Clinical samples* | 30.5 | 3.1 × 106 | 9.9 × 10-6 | 1.0 |
| *Sludge, waste* | -1.2 | 5.5 × 106 | -2.3 × 10-7 | 1.0 |
| *Soil* | 1.3 | 7.3 × 106 | 1.7 × 10-7 | 1.0 |
| *Trade* | 1.1 | 0.2 | 5.2 | 1.5 × 10-7 *** |
| *Migration* | 0.1 | 0.3 | 0.3 | 0.7 |

**Supplementary file 1o: Summary of the selected model for AACj.** *: p<0.05, **: p<0.01, ***: p<0.001.

| Autoregression coefficient φ = -0.7, Matérn smoothness ν = 16.7, Matérn scaling ρ = 4.2 | | | | |
| --- | --- | --- | --- | --- |
| **Variable** | **Estimate** | **Conditional standard error** | **t** | **p** |
| *Intercept* | -40.8 | 3.6 × 106 | -1.1 × 10-5 | 1.0 |
| *Domestic animals* | 1.6 | 7.2 × 106 | 2.3 × 10-7 | 1.0 |
| *Farms* | 1.6 | 3.9 × 106 | 4.2 × 10-7 | 1.0 |
| *Flora, fauna* | -0.2 | 10.0 × 106 | -2.1 × 10-8 | 1.0 |
| *Human samples* | 28.9 | 3.6 × 106 | 8.0 × 10-6 | 1.0 |
| *Human habitat* | 1.4 | 1.2 × 107 | 1.1 × 10-7 | 1.0 |
| *Freshwater* | -0.2 | 9.4 × 106 | -2.6 × 10-8 | 1.0 |
| *Clinical samples* | 31.7 | 3.6 × 106 | 8.8 × 10-6 | 1.0 |
| *Sludge, waste* | 2.5 | 5.8 × 106 | 4.4 × 10-7 | 1.0 |
| *Soil* | 1.4 | 7.1 × 106 | 1.9 × 10-7 | 1.0 |
| *Trade* | 1.1 | 0.4 | 2.5 | 1.1 × 10-2 * |
| *Migration* | -0.4 | 0.3 | -1.4 | 0.2 |

**Supplementary file 1p: Summary of the selected model for APHf.** *: p<0.05, **: p<0.01, ***: p<0.001.

| Autoregression coefficient φ = -0.2, Matérn smoothness ν = 0.5, Matérn scaling ρ = 0.2 | | | | |
| --- | --- | --- | --- | --- |
| **Variable** | **Estimate** | **Conditional standard error** | **t** | **p** |
| *Intercept* | -7.0 | 2.9 | -2.5 | 1.4 × 10-2 * |
| *Domestic animals* | -29.4 | 2.2 × 105 | -1.4 × 10-4 | 1.0 |
| *Farms* | -5.5 | 1.9 | -2.8 | 4.5 × 10-3 ** |
| *Flora, fauna* | -27.7 | 3.2 × 107 | -8.8 × 10-7 | 1.0 |
| *Human samples* | -0.5 | 0.7 | -0.7 | 0.5 |
| *Human habitat* | -21.2 | 4.0 × 107 | -5.3 × 10-7 | 1.0 |
| *Freshwater* | -1.6 × 103 | 5.2 × 106 | -3.1 × 10-4 | 1.0 |
| *Clinical samples* | -0.8 | 0.5 | -1.6 | 0.1 |
| *Sludge, waste* | -37.5 | 3.4 × 106 | -1.1 × 10-5 | 1.0 |
| *Soil* | -30.2 | 5.4 × 104 | -5.6 × 10-4 | 1.0 |
| *Aminoglycosides* | -0.9 | 0.2 | -4.1 | 4.8 × 10-5 *** |
| *Trade* | -1.7 | 0.2 | -7.6 | 2.1 × 10-14 *** |
| *Migration* | -1.7 | 0.8 | -2.2 | 2.4 × 10-2 * |
| *Domestic animals × Aminoglycosides* | 7.6 | 1.2 × 105 | 6.5 × 10-5 | 1.0 |
| *Farms × Aminoglycosides* | 9.6 × 10-2 | 1.6 | 6.0 × 10-2 | 1.0 |
| *Flora, fauna × Aminoglycosides* | -1.2 | 4.0 × 107 | -3.1 × 10-8 | 1.0 |
| *Human samples × Aminoglycosides* | 0.7 | 0.6 | 1.0 | 0.3 |
| *Human habitat × Aminoglycosides* | -45.9 | 1.4 × 107 | -3.2 × 10-6 | 1.0 |
| *Freshwater × Aminoglycosides* | 5.1 × 102 | 1.7 × 106 | 3.1 × 10-4 | 1.0 |
| *Clinical samples × Aminoglycosides* | 1.4 | 0.3 | 5.7 | 1.6 × 10-8 *** |
| *Sludge, waste × Aminoglycosides* | 41.7 | 7.3 × 106 | 5.7 × 10-6 | 1.0 |
| *Soil × Aminoglycosides* | 13.9 | 2.4 × 104 | 5.8 × 10-4 | 1.0 |
| *Domestic animals × Trade* | 2.4 | 6.1 × 104 | 3.9 × 10-5 | 1.0 |
| *Farms × Trade* | 2.6 | 1.0 | 2.6 | 8.7 × 10-3 ** |
| *Flora, fauna × Trade* | -1.0 | 1.8 × 107 | -5.2 × 10-8 | 1.0 |
| *Human samples × Trade* | -2.5 × 10-2 | 1.2 | -2.1 × 10-2 | 1.0 |
| *Human habitat × Trade* | 11.7 | 5.4 × 107 | 2.2 × 10-7 | 1.0 |
| *Freshwater × Trade* | -2.7 × 103 | 8.7 × 106 | -3.1 × 10-4 | 1.0 |
| *Clinical samples × Trade* | -1.8 | 0.8 | -2.4 | 1.8 × 10-2 * |
| *Sludge, waste × Trade* | 14.5 | 4.0 × 106 | 3.7 × 10-6 | 1.0 |
| *Soil × Trade* | 5.8 | 1.3 × 104 | 4.6 × 10-4 | 1.0 |
| *Domestic animals × Migration* | -3.4 | 2.3 × 105 | -1.5 × 10-5 | 1.0 |
| *Farms × Migration* | -8.7 | 2.8 | -3.2 | 1.5 × 10-3 ** |
| *Flora, fauna × Migration* | -2.6 | 6.0 × 107 | -4.4 × 10-8 | 1.0 |
| *Human samples × Migration* | -3.1 | 0.9 | -3.5 | 4.9 × 10-4 *** |
| *Human habitat × Migration* | 60.1 | 7.8 × 107 | 7.8 × 10-7 | 1.0 |
| *Freshwater × Migration* | -1.7 × 102 | 6.0 × 105 | -2.9 × 10-4 | 1.0 |
| *Clinical samples × Migration* | -2.3 | 0.4 | -6.2 | 4.2 × 10-10 *** |
| *Sludge, waste × Migration* | -19.2 | 5.2 × 106 | -3.7 × 10-6 | 1.0 |
| *Soil × Migration* | -7.5 | 3.5 × 104 | -2.1 × 10-4 | 1.0 |
